# Supplementary material for: Spatial, temporal, and inter-subject variation of the metabolome along the human upper intestinal tract
Source: Research Square preprint supplement (doi:10.21203/rs.3.rs-2099937/v1), 2022-10-06
Supplement: Supplementary file 2 [file c47c1b0652261eb6b7a89cba.xlsx]

## Sheet: Table S1
identifier	m/z	Retention time / Retention Index	Metabolite name	Superclass	Class	Subclass	Parent Level 1	ChemRICH class	MSI level	Analytical platform	Adduct type	Formula	InChIKey	SMILES	Pubchem CID	MS/MS spectrum (LCMS); MS spectrum (GCMS)	1411	1412	1413	1414	1415	1416	1417	1418	1419	1420	1421	1422	1423	1424	1425	1426	1427	1428	1429	1430	1431	1432	1433	1434	1435	1436	1437	1438	1439	1440	1441	1442	1443
1.26_247.13	247.133	1.256	(+)-Abscisic acid	Lipids and lipid-like molecules	Prenol lipids	Sesquiterpenoids	Abscisic acids and derivatives	phenolic natural products	1	HILIC ESI+	[M+H-H2O]+	C15H20O4	JLIDBLDQVAYHNE-LXGGSRJLSA-N	CC1=CC(=O)CC(C1(/C=C/C(=C\C(=O)O)/C)O)(C)C	5375199	53.03873:2334 55.05447:3316 69.03355:33389 70.45348:2246 79.05412:3058 81.06976:9573 83.04915:29814 88.0426:1963 91.05461:5638 93.03347:4450 93.06988:12175 95.0492:5666 97.02834:14714 105.06976:12415 107.08567:19938 109.02851:46237 109.06479:26294 109.10108:4912 111.04371:10412 113.06104:2405 117.07014:2458 119.085:19629 121.02853:9370 121.06477:37044 121.10108:13137 124.08701:3684 125.16309:2439…	36919	349128	4001	nd	76495	79878	27953	32503	18135	28881	72306	804714	652786	nd	nd	22809	25667	32114	224141	222286	318844	295663	nd	nd	49318	26948	8696	8607	22728	7186	10557	42756	9379
9.54_191.07	191.066	9.54	Asp-Gly	Organic acids and derivatives	Carboxylic acids and derivatives	Amino acids, peptides, and analogues	Peptides	di-peptides	1	HILIC ESI+	[M+H]+	C6H10N2O5	JHFNSBBHKSZXKB-VKHMYHEASA-N	C([C@@H](C(=O)NCC(=O)O)N)C(=O)O	151148	56.04978:17967 59.0607:7384 66.87727:8226 68.17255:7203 70.02882:207291 70.96667:7587 74.02376:7291 76.03935:807738 82.78242:8025 85.03969:229270 88.03934:3268954 99.00755:30289 99.05505:53698 110.02369:2736476 113.03452:179160 127.05019:300523 128.0341:14684 131.04506:998114 134.04514:11030 138.01857:262588 142.42377:9236 145.06061:149028 155.04488:66499 156.02901:2036459 159.12482:10275 173.055…	389034	72803	299622	207878	nd	1562617	2229	3340	186383	168413	1315857	26063	452145	642521	225207	277818	187288	167922	193390	30264	27179	3616	788092	3640	449854	5115	285323	543950	224221	617664	70331	5307	2778
26704	239	521803	1,2,4-benzenetriol	Benzenoids	Phenols	Benzenetriols and derivatives	Hydroxyquinols and derivatives	phenolic natural products	1	GCMS		C6H6O3	GGNQRNBDZQJCCN-UHFFFAOYSA-N	C1=CC(=C(C=C1O)O)O	10787	85:1133.0 87:801.0 88:613.0 89:323.0 90:201.0 91:4251.0 92:550.0 93:2640.0 94:75.0 95:856.0 96:293.0 97:2058.0 98:1945.0 99:1192.0 102:257.0 103:4006.0 104:998.0 105:3856.0 106:458.0 107:1359.0 108:659.0 109:1498.0 110:602.0 111:733.0 112:2965.0 113:841.0 114:144.0 115:1465.0 116:550.0 117:1017.0 118:106.0 119:3737.0 120:807.0 121:962.0 122:372.0 123:430.0 124:258.0 126:4.0 130:103.0 131:2962.0 1…	1539	2032	1020	634	9372	1579	15670	3226	5897	19985	883	1061	2928	19621	1371	1443	1572	2873	1449	2353	11374	6583	4984	17153	3912	5246	1732	2353	3701	9404	616	1613	1186
16557	318	651472	1,2-anhydro-myo-inositol	Organoheterocyclic compounds	Oxepanes		Oxepanes	phenolic natural products	1	GCMS		C6H10O5	ZHMWOVGZCINIHW-FTYOSCRSSA-N	[C@@H]1([C@@H]([C@H]([C@H]2[C@@H]([C@@H]1O)O2)O)O)O	119054	85:790.0 86:151.0 87:1307.0 88:8.0 90:93.0 91:58.0 95:305.0 97:198.0 98:63.0 99:708.0 101:2297.0 102:106.0 103:7446.0 104:505.0 109:190.0 110:51.0 111:679.0 112:156.0 113:813.0 116:1127.0 119:592.0 124:1.0 125:76.0 126:241.0 127:578.0 129:10841.0 131:3376.0 132:122.0 133:9161.0 134:1359.0 135:672.0 137:79.0 138:32.0 139:109.0 140:12.0 141:333.0 142:319.0 143:2694.0 144:231.0 146:121.0 147:30131.0…	8344	5733	1105	30558	548	31856	2557	1580	973	547	1288	1634	2172	3626	1700	1134	1061	4883	1116	1039	1514	1978	7106	325	555	3253	1246	797	415	338	7430	208	518
1.97_209.07	209.067	1.969	1,3,7-Trimethyluric acid	Organoheterocyclic compounds	Imidazopyrimidines	Purines and purine derivatives	Xanthines	nucleoside metabolite	1	HILIC ESI-	[M-H]-	C8H10N4O3	BYXCFUMGEBZDDI-UHFFFAOYSA-N	CN1C2=C(NC1=O)N(C(=O)N(C2=O)C)C	79437	52.75546:2588 59.0125:3226 59.48342:2913 73.33606:2984 85.47195:3062 106.62775:3577 110.9569:5424 124.05054:62050 137.02196:58738 152.04526:14099 170.05583:6252 179.02011:4773 194.04385:515357 208.85538:6542 209.06738:2409122	405466	319577	53709	87077	123032	1967044	241152	123466	104249	87533	30579	733241	215923	108931	2948640	620663	276831	169968	199413	719373	710187	379330	83885	189914	622349	473745	825469	1213	24696	15990	88112	227948	114744
4.30_195.05	195.052	4.303	1,7-Dimethyluric acid	Organoheterocyclic compounds	Imidazopyrimidines	Purines and purine derivatives	Xanthines	nucleoside metabolite	1	HILIC ESI-	[M-H]-	C7H8N4O3	NOFNCLGCUJJPKU-UHFFFAOYSA-N	CN1C2=C(NC1=O)NC(=O)N(C2=O)C	91611	62.38041:13821 110.03486:159847 123.00636:25381 124.05042:326510 136.03784:32902 137.02229:199933 138.03001:66431 152.04575:101993 160.84109:24559 170.05641:31713 180.02821:3849283 186.07516:13847 195.05185:14000025	6456789	15857339	5111445	3708277	7579700	19988733	6802327	6942399	6205563	9758309	4416488	16829044	11915073	5232278	9326651	7188426	6627613	6758896	11075304	21618383	19832299	13083495	4895122	10394618	16298377	12120758	39264299	173245	6896525	3398474	4953539	8943795	8375632
16713	299	679596	1-hexadecanol	Lipids and lipid-like molecules	Fatty Acyls	Fatty alcohols	Long-chain fatty alcohols	fatty alcohols	1	GCMS		C16H34O	BXWNKGSJHAJOGX-UHFFFAOYSA-N	CCCCCCCCCCCCCCCCO	2682	85:705.0 86:51.0 89:1086.0 90:140.0 91:307.0 97:1910.0 98:76.0 99:149.0 100:37.0 101:703.0 102:99.0 103:1810.0 104:22.0 106:25.0 110:37.0 111:800.0 112:61.0 113:101.0 114:49.0 115:16.0 117:120.0 125:182.0 127:25.0 129:351.0 130:47.0 142:3.0 143:136.0 144:18.0 145:15.0 157:186.0 184:83.0 187:40.0 189:14.0 201:2.0 204:93.0 205:304.0 206:39.0 209:9.0 217:431.0 218:22.0 219:17.0 227:8.0 229:22.0 231:…	516	1443	1596	1639	5506	1788	7094	1359	1028	2069	716	274	1096	603	680	1008	1479	1876	491	515	1421	726	580	362	980	135	1879	171	346	399	96	194	1035
14692	361	1123027	1-kestose	Organic oxygen compounds	Organooxygen compounds	Carbohydrates and carbohydrate conjugates	Oligosaccharides	sugars	1	GCMS		C18H32O16	VAWYEUIPHLMNNF-OESPXIITSA-N	C([C@@H]1[C@H]([C@@H]([C@H]([C@H](O1)O[C@]2([C@H]([C@@H]([C@H](O2)CO)O)O)CO[C@]3([C@H]([C@@H]([C@H](O3)CO)O)O)CO)O)O)O)O	440080	85:82.0 86:7.0 87:73.0 88:49.0 89:205.0 90:6.0 91:36.0 92:11.0 93:9.0 94:6.0 95:27.0 96:65.0 97:71.0 98:15.0 99:87.0 100:11.0 101:252.0 102:170.0 103:4097.0 104:359.0 105:175.0 106:23.0 107:40.0 108:5.0 109:193.0 110:14.0 111:55.0 112:15.0 113:139.0 114:34.0 115:149.0 116:95.0 117:736.0 118:77.0 119:85.0 120:6.0 121:16.0 122:12.0 123:22.0 124:13.0 125:21.0 126:24.0 127:99.0 128:17.0 129:2764.0 13…	25077	231	60233	56942	785	264339	458	377	204	299	95319	396	517	62781	1041	672	705	738	568	192	253	446	2080	469	346	297	825	285	292	240	937	180	285
5.82_298.11	298.115	5.82	1-Methylguanosine	Nucleosides, nucleotides, and analogues	Purine nucleosides		Purine nucleosides	nucleoside metabolite	1	HILIC ESI+	[M+H]+	C11H15N5O5	UTAIYTHAJQNQDW-KQYNXXCUSA-N	CN1C(N)=NC2=C(N=CN2[C@@H]2O[C@H](CO)[C@@H](O)[C@H]2O)C1=O	96373	50.58628:2473 68.03947:2331 69.0337:3756 72.79224:2394 87.04434:3123 101.06001:3233 119.12873:2563 135.02979:2652 147.06537:3283 150.2291:2108 152.0567:594590 166.07239:122012 184.50636:2192 196.98178:13864 224.07686:2541	1081065	549420	673446	919194	nd	2343406	11848	77942	nd	nd	840743	386585	23899	1088113	598645	39752	nd	114346	550380	198765	182991	138288	212018	4378	40763	281277	nd	173521	27411	nd	270178	139592	53038
6.21_137.07	137.071	6.206	1-Methylnicotinamide	Organoheterocyclic compounds	Pyridines and derivatives	Pyridinecarboxylic acids and derivatives	Pyridinecarboxamides	nucleoside metabolite	1	HILIC ESI+	[M]+	C7H9N2O	LDHMAVIPBRSVRG-UHFFFAOYSA-O	C[N+]1=CC=CC(=C1)C(=O)N	457	50.57256:1820 65.04363:1685 67.55415:1824 95.06036:19408 96.27197:1842 109.07642:1754 137.07126:3751	157090	6080	131420	77936	nd	375824	8949	5748	5628	11287	31134	6585	nd	49444	2283248	216363	166326	150849	4369	19244	39397	15653	175518	4362	13223	39910	9415	89857	723717	nd	79236	11203	7482
2070	371	901749	1-monopalmitin	Lipids and lipid-like molecules	Glycerolipids	Monoradylglycerols	Monoacylglycerols	glycerides	1	GCMS		C19H38O4	QHZLMUACJMDIAE-UHFFFAOYSA-N	CCCCCCCCCCCCCCCC(=O)OCC(CO)O	14900	85:11049.0 86:1066.0 87:1727.0 88:2503.0 89:4332.0 90:546.0 91:849.0 93:1712.0 94:656.0 95:11870.0 96:1156.0 97:8236.0 98:3082.0 99:3966.0 100:546.0 101:20046.0 102:2216.0 103:20674.0 104:2095.0 105:2096.0 106:183.0 107:1123.0 108:131.0 109:6523.0 110:712.0 111:3012.0 112:681.0 113:1739.0 114:217.0 115:2374.0 116:10634.0 117:15865.0 118:1742.0 119:1613.0 120:72.0 121:1202.0 122:204.0 123:3774.0 1…	4185	4034	6423	9533	14014	3277	17271	4665	1937	6620	2105	2298	7262	4611	3475	2153	6843	7164	3083	4817	6457	5918	2213	9974	8154	1912	6638	6198	5238	3797	403	966	5156
648	203	959214	1-monostearin	Lipids and lipid-like molecules	Glycerolipids	Monoradylglycerols	Monoacylglycerols	glycerides	1	GCMS		C21H42O4	VBICKXHEKHSIBG-UHFFFAOYSA-N	CCCCCCCCCCCCCCCCCC(=O)OCC(CO)O	24699	85:2387.0 86:245.0 88:342.0 89:880.0 90:108.0 91:126.0 93:404.0 94:183.0 95:2259.0 96:306.0 97:2167.0 98:609.0 99:768.0 100:91.0 101:4087.0 102:436.0 103:4290.0 104:462.0 105:416.0 106:95.0 107:246.0 108:39.0 109:1410.0 110:130.0 111:1003.0 112:196.0 113:337.0 114:74.0 115:511.0 116:2218.0 117:3517.0 118:444.0 119:328.0 120:48.0 121:179.0 122:22.0 123:677.0 124:97.0 125:278.0 128:153.0 129:4761.0…	4347	902	1143	2407	13340	4920	8974	3534	3578	8119	504	1072	2599	5101	4825	4728	5391	6140	2738	3174	5811	4383	1521	6789	4334	548	2208	2381	3507	2198	2120	2136	3599
62493	271	550289	2,4-hexadienedioic acid	Lipids and lipid-like molecules	Fatty Acyls	Fatty acids and conjugates	Medium-chain fatty acids	unsaturated fatty acids	1	GCMS		C6H6O4	TXXHDPDFNKHHGW-CCAGOZQPSA-N	C(=C\C(=O)O)\C=C/C(=O)O	5280518	85:97.0 136:3.0 138:15.0 147:858.0 164:57.0 167:23.0 168:31.0 169:583.0 182:396.0 190:40.0 196:312.0 210:90.0 217:262.0 228:11.0 242:47.0 244:425.0 245:476.0 270:63.0 271:2159.0 272:522.0 285:37.0 286:187.0 287:96.0 288:60.0 296:6.0 307:154.0 361:29.0 375:3.0 436:9.0 484:4.0 488:11.0	5079	2652	5111	3479	45005	1950	34920	3694	12933	5504	975	2574	4610	2612	14390	5424	3552	3924	3526	5327	2961	4851	1417	5625	1983	2384	5415	2540	9009	3682	1214	2650	3631
9.90_189.09	189.087	9.9	2,6-Diaminopimelic acid	Organic acids and derivatives	Carboxylic acids and derivatives	Amino acids, peptides, and analogues	Amino acids and derivatives	dicarboxylic acids	1	HILIC ESI-	[M-H]-	C7H14N2O4	GMKMEZVLHJARHF-UHFFFAOYSA-N	C(CC(C(=O)O)N)CC(C(=O)O)N	53448507	50.83942:2267 55.54129:2628 57.03293:2499 57.1699:1850 72.0077:35533 72.04411:4573 74.02331:11763 82.06486:4755 83.01258:3537 83.04906:2502 97.07605:2956 101.02318:29697 101.40452:2054 108.04459:3988 109.07554:3581 110.0599:9450 111.0439:61725 111.05239:3363 125.07063:4611 126.05494:38730 127.00254:3119 127.08644:40820 128.07043:336985 139.61349:2100 143.08194:2925 145.097:25811 171.07655:143713 …	634	15483	nd	401	3185	nd	5690	34301	27046	12193	nd	32003	27432	526	558	45120	21160	20432	62583	144694	123068	167246	7562	36889	94825	12801	91381	7672	36394	79835	nd	60521	33740
1.36_162.05	162.055	1.364	2,8-Quinolinediol	Organoheterocyclic compounds	Quinolines and derivatives	Quinolones and derivatives	Quinolones and derivatives	indoles	1	HILIC ESI+	[M+H]+	C9H7NO2	ZXZKYYHTWHJHFT-UHFFFAOYSA-N	C1=CC2=C(C(=C1)O)NC(=O)C=C2	97250	61.24891:1816 82.69893:1851 90.88068:1957 144.0451:2556 162.05487:972802	278035	nd	83491	307504	3992	271044	nd	nd	nd	nd	402861	nd	nd	441630	nd	nd	2063	nd	nd	nd	11630	nd	nd	nd	nd	nd	17599	nd	nd	nd	341969	nd	nd
160842	130	285825	2-aminobutyric acid	Organic acids and derivatives	Carboxylic acids and derivatives	Amino acids, peptides, and analogues	Amino acids and derivatives	butyrates	1	GCMS		C4H9NO2	QWCKQJZIFLGMSD-UHFFFAOYSA-N	CCC(C(=O)O)N	6657	85:2349.0 86:7340.0 87:2626.0 88:1175.0 89:967.0 93:154.0 94:231.0 95:643.0 96:816.0 98:6012.0 99:1182.0 100:17704.0 101:5509.0 102:2953.0 103:8799.0 104:770.0 105:1178.0 107:62.0 109:384.0 111:91.0 112:296.0 113:378.0 114:7166.0 115:3812.0 116:1978.0 117:3932.0 118:356.0 119:558.0 120:162.0 126:773.0 128:1855.0 129:1466.0 130:243176.0 131:34789.0 132:12476.0 133:8893.0 134:1271.0 135:699.0 136:8…	3761	27157	30376	5943	24835	1997	64825	28262	38106	14099	1466	7814	19023	3479	6401	24449	29547	42510	15496	33416	46928	90889	658	74679	32929	10919	44104	8639	20075	15833	609	6974	33364
6.00_226.08	226.083	6.005	2'-Deoxycytidine	Nucleosides, nucleotides, and analogues	Pyrimidine nucleosides	Pyrimidine 2'-deoxyribonucleosides	Pyrimidine 2'-deoxyribonucleosides	nucleoside metabolite	1	HILIC ESI-	[M-H]-	C9H13N3O4	CKTSBUTUHBMZGZ-SHYZEUOFSA-N	C1[C@@H]([C@H](O[C@H]1N2C=CC(=NC2=O)N)CO)O	13711	51.67918:1944 54.2357:2130 56.19544:1881 66.03346:7893 73.53805:1988 89.09651:2194 93.04445:121876 132.10378:2198 135.05521:16823 136.05049:3106 200.6478:2803 200.66602:3624 226.08191:13979	nd	14626	4251	151128	414	2461	5299	575	nd	nd	723	22314	20989	30256	nd	328	577	nd	1536	773	604	1095	14812	10888	2530	31868	3385	nd	11547	1525	1422	8092	1348
6.55_268.10	268.104	6.547	2'-Deoxyguanosine	Nucleosides, nucleotides, and analogues	Purine nucleosides	Purine 2'-deoxyribonucleosides	Purine 2'-deoxyribonucleosides	nucleoside metabolite	1	HILIC ESI+	[M+H]+	C10H13N5O4	YKBGVTZYEHREMT-KVQBGUIXSA-N	C1[C@@H]([C@H](O[C@H]1N2C=NC3=C2N=C(NC3=O)N)CO)O	187790	61.81278:2650 71.04945:1964 73.02836:3147 81.0332:3199 81.48027:1949 90.46106:1981 95.8149:2008 99.0439:8647 103.50243:2332 115.99194:2135 117.05463:39280 129.40533:2180 152.05663:797724 153.04115:2789 224.46324:2233	629640	1311899	297669	2345774	7816	1421955	123715	nd	27431	3478	4473397	396615	224727	592616	319198	77369	nd	4402	108226	13785	117440	nd	1487417	119830	276489	409870	411795	249220	529136	51004	2654	379755	71465
1208	189	433456	2-deoxytetronic acid	Organic acids and derivatives	Hydroxy acids and derivatives	Beta hydroxy acids and derivatives	Beta hydroxy acids and derivatives	hydroxybutyrates	1	GCMS		C4H8O4	DZAIOXUZHHTJKN-UHFFFAOYSA-N	C(C(CO)O)C(=O)O	150929	85:3678.0 86:419.0 87:1070.0 88:693.0 89:3868.0 90:231.0 91:269.0 92:61.0 94:196.0 96:136.0 97:220.0 98:279.0 99:1268.0 100:276.0 101:10175.0 102:1066.0 103:3549.0 104:443.0 105:707.0 106:118.0 107:102.0 108:142.0 109:54.0 111:177.0 112:57.0 113:377.0 114:530.0 115:1621.0 116:869.0 117:12125.0 118:1194.0 119:1640.0 120:183.0 121:154.0 123:18.0 127:243.0 129:6961.0 130:984.0 131:3106.0 132:474.0 1…	1628	317	1544	1474	4465	627	1462	1765	486	3219	1024	1098	1832	1404	3145	2363	987	2152	879	1864	2086	1496	620	4187	2331	688	4181	3102	1528	3873	289	533	1665
3.15_227.07	227.067	3.153	2-Deoxyuridine	Nucleosides, nucleotides, and analogues	Pyrimidine nucleosides	Pyrimidine 2'-deoxyribonucleosides	Pyrimidine 2'-deoxyribonucleosides	nucleoside metabolite	1	HILIC ESI-	[M-H]-	C9H12N2O5	MXHRCPNRJAMMIM-SHYZEUOFSA-N	C1[C@@H]([C@H](O[C@H]1N2C=CC(=O)NC2=O)CO)O	13712	61.85702:1902 66.03366:4336 67.20231:1795 94.02848:32197 94.03474:2769 116.29935:2029 136.03941:12808 157.99249:2385 161.33652:2281 163.04121:2686 184.06053:86159 203.78072:3250 216.53026:2296 227.06645:23549	653222	6647753	138130	209520	41755	1929180	423289	90583	122007	21050	3782306	2261575	318621	171680	227558	44643	nd	1529	814582	250124	162632	66685	3427520	930585	2337540	394065	1689287	13139	482269	280004	57189	791167	91160
64653	247	508940	2-hydroxyglutaric acid	Organic acids and derivatives	Hydroxy acids and derivatives	Short-chain hydroxy acids and derivatives	Short-chain hydroxy acids and derivatives	amino acids	1	GCMS		C5H8O5	HWXBTNAVRSUOJR-UHFFFAOYSA-N	C(CC(=O)O)C(C(=O)O)O	43	85:49170.0 94:4316.0 95:8610.0 96:411.0 99:3425.0 101:2531.0 107:138.0 108:287.0 109:460.0 112:3773.0 116:10630.0 117:5990.0 129:189957.0 130:27268.0 131:17646.0 133:14331.0 134:3025.0 135:3017.0 143:753.0 145:236.0 147:66751.0 148:9317.0 149:28512.0 150:3531.0 151:2259.0 157:51462.0 159:7840.0 161:1150.0 162:214.0 163:4874.0 165:462.0 169:1849.0 170:49.0 185:1987.0 186:1991.0 190:250.0 192:795.0…	3734	5023	812	1654	2430	4576	4194	2362	3069	1586	233	3213	5656	1404	3005	2068	1584	3242	1733	2055	1514	1941	1060	2813	12786	4458	2018	1068	168	1914	196	2171	2780
106285	159	323093	2-hydroxyhexanoic acid	Lipids and lipid-like molecules	Fatty Acyls	Fatty acids and conjugates	Medium-chain fatty acids	hydroxy FAs	1	GCMS		C6H12O3	NYHNVHGFPZAZGA-UHFFFAOYSA-N	CCCCC(C(=O)O)O	99824	85:2528.0 86:217.0 89:1183.0 91:1239.0 92:10.0 95:533.0 96:320.0 97:3794.0 99:1207.0 100:413.0 101:9121.0 102:2348.0 103:244244.0 104:22720.0 105:10978.0 106:385.0 107:98.0 111:328.0 113:645.0 114:79.0 115:3049.0 116:1091.0 117:13399.0 118:1166.0 119:2183.0 120:143.0 121:80.0 123:138.0 125:211.0 126:184.0 127:839.0 128:82.0 129:7199.0 130:1397.0 131:13592.0 132:1792.0 133:21896.0 134:3009.0 135:1…	760	5334	702	437	2272	992	2776	7821	9512	1460	2480	3744	5155	947	432	1766	1422	1835	3724	5228	4343	2343	1367	5850	6173	4509	1980	2723	4265	3224	154	4477	1303
4.25_283.10	283.104	4.254	2'-O-Methylinosine	Nucleosides, nucleotides, and analogues	Purine nucleosides		Purine nucleosides	nucleoside metabolite	1	HILIC ESI+	[M+H]+	C11H14N4O5	HPHXOIULGYVAKW-IOSLPCCCSA-N	COC1C(C(OC1N2C=NC3=C2N=CNC3=O)CO)O	10062287	58.88362:1916 62.79564:2137 65.17855:2192 89.05951:4238 127.99294:2062 137.04581:103896 200.3418:4923 208.85661:1971 211.92372:1843 270.59451:2298 283.11435:2146 283.16656:4367	139356	346540	3549	36667	nd	168202	2978	6403	nd	nd	326360	172209	nd	76385	7652	nd	nd	nd	233635	67096	54815	16763	256372	nd	nd	105521	nd	5457	3809	nd	nd	5706	5018
2.40_257.08	257.078	2.399	2'-O-Methyluridine	Nucleosides, nucleotides, and analogues	Pyrimidine nucleosides		Pyrimidine nucleosides	nucleoside metabolite	1	HILIC ESI-	[M-H]-	C10H14N2O6	SXUXMRMBWZCMEN-ZOQUXTDFSA-N	CO[C@@H]1[C@@H]([C@H](O[C@H]1N2C=CC(=O)NC2=O)CO)O	102212	65.01333:2405 81.67902:1903 94.02856:2276 103.24758:2169 104.87342:2092 107.58268:2075 109.01567:4356 116.07063:8308 124.03926:34345 125.57214:2401 148.80328:2062 153.05473:2815 166.05136:2256 171.14902:5131 182.08224:2911 203.38223:2464 213.14886:9044 214.07158:130553 257.03043:2568 257.07974:18835 257.10736:3711 257.13925:19887	77284	328367	6502	58226	1047	194772	28399	65383	45880	633	195072	256124	27728	48661	31559	12767	nd	nd	240926	163476	144621	76056	265936	388239	247824	155808	11474	nd	7596	8910	29239	71900	41821
1.37_165.05	165.055	1.366	3-(3-Hydroxyphenyl)propionic acid	Phenylpropanoids and polyketides	Phenylpropanoic acids		Phenylpropanoic acids	phenolic natural products	1	HILIC ESI-	[M-H]-	C9H10O3	QVWAEZJXDYOKEH-UHFFFAOYSA-N	C1=CC(=CC(=C1)O)CCC(=O)O	91	59.01249:36485 63.97233:2799 65.03836:6745 67.01775:2710 79.05374:4676 80.02521:11236 81.03345:4094 91.05429:30657 92.02528:26097 93.0332:62704 93.06969:18875 95.01254:3420 106.04118:158510 107.04903:129663 108.02048:23263 109.02815:13849 117.03298:10319 119.04904:4091734 120.05239:67537 120.69811:5597 121.02829:190224 121.06461:7223925 121.43223:4576 122.06792:127159 133.68785:3260 135.04449:204…	2793992	51815801	57449	32869	45032555	6206036	11588010	10918884	21880628	26405416	1435571	80721246	63843587	53506	423505	8851293	4657683	1998791	4797153	9151285	12349994	8251040	4517993	3059069	42295540	7704992	110482198	420478	5340013	14892968	804071	3155185	6301643
110341	179	598147	3-(4-hydroxyphenyl)propionic acid	Phenylpropanoids and polyketides	Phenylpropanoic acids		Phenylpropanoic acids	phenylpropionates	1	GCMS		C9H10O3	NMHMNPHRMNGLLB-UHFFFAOYSA-N	C1=CC(=CC=C1CCC(=O)O)O	10394	85:576.0 87:354.0 88:431.0 89:1639.0 90:679.0 91:2659.0 92:227.0 93:254.0 95:404.0 97:47.0 99:124.0 101:578.0 102:306.0 104:649.0 105:1003.0 107:471.0 110:63.0 115:641.0 116:1512.0 117:868.0 118:186.0 119:494.0 120:81.0 121:377.0 123:164.0 124:62.0 127:41.0 131:1081.0 133:818.0 134:134.0 135:1445.0 136:155.0 137:195.0 140:1363.0 141:53.0 145:234.0 147:1204.0 148:168.0 149:1752.0 150:374.0 151:130…	1465	6658	1501	1804	28548	1316	8118	9537	5251	22367	509	4222	21851	1895	696	2937	6152	9294	5236	6867	26049	18982	683	6036	11123	7428	10408	3488	8241	2005	168	2120	2709
2.30_167.03	167.034	2.299	3,4-Dihydroxyphenylacetic acid	Benzenoids	Phenols	Benzenediols	Catechols	phenylacetates	1	HILIC ESI-	[M-H]-	C8H8O4	CFFZDZCDUFSOFZ-UHFFFAOYSA-N	C1=CC(=C(C=C1CC(=O)O)O)O	547	56.76364:2278 56.89678:1953 62.05491:1767 62.15488:1996 63.14993:1777 80.69124:1853 95.04908:2308 96.80159:1735 98.78987:1796 110.26123:2119 116.70103:2132 117.37087:2012 123.04393:334819 124.04728:2512 132.86668:63101 151.56905:2014 151.97731:1936 162.44759:2250 167.02023:3866 167.03482:49219	34421	498309	47479	36057	2164025	111437	184745	131996	161474	40645	59862	289514	440646	49257	54334	37106	71344	28819	111701	120078	91892	131028	42139	124080	192544	118291	127955	101906	80548	43287	66431	80327	63942
102714	231	588886	3,6-anhydro-D-galactose	Organoheterocyclic compounds	Tetrahydrofurans		Tetrahydrofurans	sugars	1	GCMS		C6H10O5	WZYRMLAWNVOIEX-BGPJRJDNSA-N	C1[C@H]([C@@H]([C@H](O1)[C@H](C=O)O)O)O	16069996	85:192.0 86:135.0 87:64.0 88:217.0 89:4369.0 90:296.0 91:328.0 92:63.0 93:171.0 94:173.0 95:2021.0 96:291.0 97:94.0 98:608.0 99:333.0 100:613.0 101:2506.0 102:326.0 103:4816.0 104:494.0 105:1735.0 106:197.0 107:96.0 108:60.0 109:30.0 110:66.0 111:435.0 112:245.0 113:287.0 114:68.0 115:458.0 116:580.0 117:2812.0 118:407.0 119:583.0 121:215.0 122:64.0 123:123.0 124:59.0 125:104.0 126:952.0 127:256.…	2882	3977	2174	9015	4888	7353	1824	1218	1351	2090	925	1313	3236	3711	1010	1869	1783	2932	1757	4563	7398	5573	856	2858	7630	3397	15478	1154	2056	2140	1474	1233	2752
16782	231	587617	3,6-anhydro-D-glucose	Organoheterocyclic compounds	Tetrahydrofurans		Tetrahydrofurans	sugars	1	GCMS		C6H10O5	WZYRMLAWNVOIEX-SLPGGIOYSA-N	C1[C@H]([C@H]([C@H](O1)[C@H](C=O)O)O)O	16069993	85:2651.0 86:1379.0 87:3019.0 88:1300.0 89:25434.0 90:2285.0 91:1263.0 92:115.0 93:1209.0 94:1132.0 95:14971.0 96:2959.0 97:1423.0 98:4240.0 99:2750.0 100:4219.0 101:13829.0 102:3622.0 103:44711.0 104:3976.0 105:12724.0 106:1217.0 107:496.0 108:481.0 109:489.0 110:986.0 111:2472.0 112:1444.0 113:1770.0 114:861.0 115:3085.0 116:3634.0 117:19400.0 118:2401.0 119:3534.0 120:636.0 121:1755.0 122:419.…	4098	3977	2174	9436	1668	6092	1733	1218	1351	2090	925	2096	3236	4189	2279	1869	1783	2932	1757	5191	9412	5573	856	2858	7630	3397	15670	3160	2056	2198	1525	1233	2752
68084	248	455267	3-aminoisobutyric acid	Organic acids and derivatives	Carboxylic acids and derivatives	Amino acids, peptides, and analogues	Amino acids and derivatives	amino acids	1	GCMS		C4H9NO2	QCHPKSFMDHPSNR-UHFFFAOYSA-N	CC(CN)C(=O)O	64956	86:338518.0 87:46881.0 88:16592.0 99:1719.0 100:184623.0 101:23299.0 102:35160.0 103:16116.0 104:4899.0 113:5017.0 114:8548.0 115:3909.0 116:23405.0 117:18916.0 118:5795.0 119:6263.0 120:431.0 122:605.0 130:36886.0 131:26230.0 132:14131.0 133:54171.0 134:10324.0 135:989.0 136:144.0 144:5214.0 146:15280.0 147:92433.0 148:14500.0 149:6149.0 150:1268.0 157:1090.0 158:5311.0 160:11439.0 162:1053.0 17…	139	383	695	394	1984	133	1071	3306	605	658	177	793	4870	334	1129	4224	1661	4689	1952	2908	1881	282	725	1406	5638	181	2374	4843	264	340	11	1026	141
215853	156	525893	3-Aminopiperidine-2,6-dione	Organic acids and derivatives	Carboxylic acids and derivatives	Amino acids, peptides, and analogues	Amino acids and derivatives	di-peptides	1	GCMS		C5H8N2O2	NPWMTBZSRRLQNJ-UHFFFAOYSA-N	C1CC(=O)NC(=O)C1N	134508	85:6557.0 86:3382.0 92:43.0 94:225.0 95:211.0 97:365.0 98:2675.0 99:2953.0 100:7113.0 101:3220.0 106:82.0 108:195.0 110:581.0 111:400.0 112:4029.0 113:2102.0 114:2003.0 115:1921.0 116:17844.0 117:3573.0 118:1437.0 119:557.0 121:1648.0 122:20.0 123:33.0 124:139.0 126:467.0 127:579.0 128:1787.0 129:3959.0 130:2661.0 132:634.0 133:3611.0 134:400.0 135:376.0 138:92.0 139:170.0 140:7311.0 141:2540.0 1…	1742	25622	2532	5017	4976	10148	7827	12929	7368	2322	5707	1123	1764	3418	12737	2468	9731	1680	1241	1455	4532	1356	16103	4439	3856	4049	2985	1295	14485	1444	2433	1538	3293
32360	164	527648	3-hydroxyphenylacetic acid	Benzenoids	Phenols	1-hydroxy-4-unsubstituted benzenoids	1-hydroxy-4-unsubstituted benzenoids	phenylacetates	1	GCMS		C8H8O3	FVMDYYGIDFPZAX-UHFFFAOYSA-N	C1=CC(=CC(=C1)O)CC(=O)O	12122	88:403.0 89:1968.0 90:785.0 91:466.0 92:69.0 94:4.0 95:264.0 96:6.0 97:9.0 98:68.0 99:48.0 100:15.0 101:501.0 102:233.0 103:1057.0 104:282.0 105:1724.0 106:281.0 107:122.0 108:247.0 109:95.0 110:133.0 111:66.0 112:213.0 113:330.0 114:171.0 115:2107.0 116:239.0 117:2387.0 118:279.0 119:250.0 121:128.0 122:5.0 123:17.0 124:48.0 126:30.0 127:55.0 128:255.0 129:2636.0 130:687.0 131:1253.0 132:157.0 1…	627	261	876	2359	3829	568	3278	394	1647	727	271	268	1539	684	700	1515	1842	1106	2045	20767	5975	4460	638	3348	1452	887	10295	1591	1206	831	165	142	608
2.85_263.02	263.023	2.85	3-Methoxy-4-hydroxyphenylglycol sulfate	Benzenoids	Phenols	Methoxyphenols	Methoxyphenols	steroid and conjugates	1	HILIC ESI-	[M-H]-	C9H12O7S	SBKADJXSGGTEPN-UHFFFAOYSA-N	COC1=C(C=CC(=C1)C(CO)OS(=O)(=O)O)O	3035420	52.66817:1849 76.53355:2319 79.95614:12083 96.95885:3710 112.46529:2097 114.90009:2308 143.30658:2113 150.03122:54397 165.05492:103266 183.06558:15137 203.00124:10308 212.72208:2014 263.02335:93920	167018	1794	80776	66978	nd	634776	nd	nd	nd	779	107653	nd	nd	82220	224647	nd	1009	nd	2528	nd	nd	nd	126958	nd	nd	nd	nd	nd	nd	nd	29863	2202	1934
1.14_123.04	123.044	1.143	3-Methylcatechol	Benzenoids	Phenols	Benzenediols	Catechols	phenolic natural products	1	HILIC ESI-	[M-H]-	C7H8O2	PGSWEKYNAOWQDF-UHFFFAOYSA-N	CC1=C(C(=CC=C1)O)O	340	77.15457:2139 84.38985:1832 108.02085:3346 122.03608:11038 123.04406:78664	1000	326046	9926	51887	424573	23872	104126	191400	232225	8644	19058	308106	263392	20751	14056	15311	8221	13097	563974	79750	15209	156570	60285	275445	109533	544045	9994	3685	15730	56947	508468	422404	170087
9.50_168.08	168.077	9.496	3-Methylhistidine	Organic acids and derivatives	Carboxylic acids and derivatives	Amino acids, peptides, and analogues	Amino acids and derivatives	methylated amino acid	1	HILIC ESI-	[M-H]-	C7H11N3O2	JDHILDINMRGULE-LURJTMIESA-N	CN1C=NC=C1C[C@@H](C(=O)O)N	64969	70.10339:2056 72.00771:22241 76.69037:1891 93.04457:4695 115.62549:2024 136.37662:2006 150.06714:3904 151.05023:84601 168.03122:9902 168.07698:186730	1121	6501	nd	893	6140	nd	3405	10455	7031	20865	nd	7684	4262	nd	98518	1224	477	2258	167906	692904	356009	145626	39802	61631	131166	21550	115816	nd	26917	19994	28280	18960	24426
4.38_283.10	283.104	4.378	3'-O-Methylinosine	Nucleosides, nucleotides, and analogues	Purine nucleosides		Purine nucleosides	nucleoside metabolite	1	HILIC ESI+	[M+H]+	C11H14N4O5	ABXDBVMGRKZFRC-VTFQDDHLSA-N	COC1[C@H](O[C@H](C1O)N2C=NC3=C2N=CNC3=O)CO	135121872	54.79305:2313 57.03344:2586 65.67649:2113 68.6734:1931 83.57337:2363 88.07563:2312 89.05939:10915 100.50189:2252 102.408:2073 111.54974:2063 113.95747:1969 114.81139:2062 133.04803:2220 133.08572:2637 137.04572:9451 151.06128:885153 164.14105:2343 167.19792:2503 199.52031:2296	904490	34338	445985	716615	nd	1588825	3867	4213	nd	nd	778936	4614	23824	804680	534038	nd	nd	7285	27568	614	1703	nd	79409	nd	3255	42507	nd	nd	155816	nd	207430	nd	nd
2.09_165.05	165.055	2.089	3-Phenyllactic acid	Phenylpropanoids and polyketides	Phenylpropanoic acids		Phenylpropanoic acids	nucleoside metabolite	1	HILIC ESI-	[M-H]-	C9H10O3	VOXXWSYKYCBWHO-UHFFFAOYSA-N	C1=CC=C(C=C1)CC(C(=O)O)O	3848	55.63946:1936 72.99187:19359 74.34238:1829 88.92857:2113 93.04478:3452 107.57566:2485 119.04884:20111 120.81429:1731 121.02833:17678 121.03901:4201 147.04425:98610 150.03064:9752 164.83562:10210 165.01801:4272 165.05453:44634 165.0674:2146	108009	602998	15709	8588	151255	579113	85065	930179	662015	104575	1939309	367306	231539	14780	36590	260135	97379	119943	161556	670567	218074	348436	1022789	139523	690609	225996	638805	24041	372013	275205	39202	514818	185819
85123	233	325027	4-hydroxybutyric acid	Lipids and lipid-like molecules	Fatty Acyls	Fatty acids and conjugates	Hydroxy fatty acids	hydroxybutyrates	1	GCMS		C4H8O3	SJZRECIVHVDYJC-UHFFFAOYSA-N	C(CC(=O)O)CO	10413	85:1473.0 86:1030.0 88:1141.0 90:78.0 97:88.0 99:1509.0 100:534.0 101:1470.0 102:152.0 103:1274.0 104:135.0 105:287.0 109:555.0 110:127.0 111:131.0 113:83.0 115:915.0 116:653.0 117:10011.0 118:922.0 119:717.0 129:821.0 130:174.0 131:930.0 132:466.0 133:1873.0 134:148.0 143:2878.0 144:298.0 147:42121.0 148:6583.0 149:3200.0 150:406.0 151:85.0 157:102.0 187:41.0 192:99.0 204:836.0 205:197.0 222:17.…	391	551	760	600	3517	253	14108	788	3427	1761	238	780	2382	1105	202	2159	1643	2310	850	1719	1864	1750	279	2096	2220	1427	1929	817	906	990	92	580	1611
5.85_194.05	194.045	5.846	4-Hydroxyhippuric acid	Benzenoids	Benzene and substituted derivatives	Benzoic acids and derivatives	Benzamides	phenolic natural products	1	HILIC ESI-	[M-H]-	C9H9NO4	ZMHLUFWWWPBTIU-UHFFFAOYSA-N	C1=CC(=CC=C1C(=O)NCC(=O)O)O	151012	74.02341:21498 74.94664:2131 93.03326:84935 100.00269:129322 100.01012:4176 150.0551:32831 194.04541:19661	47906	41374	27504	32907	1438	200116	7452	70479	39718	10922	43200	41012	7888	37870	156175	39065	34196	79803	34076	29739	53788	38997	83003	12940	37030	142275	20421	20307	206981	67533	13768	96139	54538
1.05_179.03	179.034	1.055	4-Hydroxyphenylpyruvic acid	Benzenoids	Benzene and substituted derivatives	Phenylpyruvic acid derivatives	Phenylpyruvic acid derivatives	nucleoside metabolite	1	HILIC ESI-	[M-H]-	C9H8O4	KKADPXVIOXHVKN-UHFFFAOYSA-N	C1=CC(=CC=C1CC(=O)C(=O)O)O	979	52.06295:1593 54.13511:1806 61.76381:2163 74.0249:2042 92.02544:2151 108.02054:25588 136.0157:12208 151.03937:7818 178.90335:2583 179.03406:93694	26617	37528	23162	23063	16372	63128	16298	23915	24212	9340	35884	34206	17085	26695	25580	15311	31408	21422	35077	26287	24153	51169	27193	19382	41133	39593	32534	65727	26727	16585	21647	48277	18286
1.27_144.05	144.048	1.272	4-Methyl-5-thiazoleethanol	Organoheterocyclic compounds	Azoles	Thiazoles	4,5-disubstituted thiazoles	organosulfate	1	HILIC ESI+	[M+H]+	C6H9NOS	BKAWJIRCKVUVED-UHFFFAOYSA-N	CC1=C(SC=N1)CCO	1136	59.80291:1638 63.74769:1805 68.9746:1955 69.37393:1771 113.02946:3021 115.01213:1831 126.03719:2386 144.04753:19806 144.0807:7210	4367	91662	nd	nd	40187	27862	33553	144609	233132	61354	nd	52943	34176	55931	6627	34910	60792	48232	36240	52577	106398	54298	43144	38473	186851	30851	189067	nd	9978	24901	89145	36316	51248
2.84_182.05	182.045	2.837	4-Pyridoxic acid	Organoheterocyclic compounds	Pyridines and derivatives	Pyridinecarboxylic acids and derivatives	Pyridinecarboxylic acids	nucleoside metabolite	1	HILIC ESI-	[M-H]-	C8H9NO4	HXACOUQIXZGNBF-UHFFFAOYSA-N	CC1=NC=C(C(=C1O)C(=O)O)CO	6723	55.10346:2085 63.65017:2204 94.02844:12121 108.04423:94719 111.04395:7961 120.04427:10484 138.05486:510851 139.05829:4536 151.91862:2232 182.045:209494	83368	453799	25819	42337	161012	761566	280428	164550	168476	68017	62653	688116	299204	57564	204415	116976	81176	79387	785247	3230883	2754319	940903	257399	223858	1159608	348013	1829957	5512	265230	258497	103096	211118	199534
1676	174	540425	5-aminovaleric acid	Organic acids and derivatives	Carboxylic acids and derivatives	Amino acids, peptides, and analogues	Amino acids and derivatives	amino acids	1	GCMS		C5H11NO2	JJMDCOVWQOJGCB-UHFFFAOYSA-N	C(CCN)CC(=O)O	138	85:369.0 86:10350.0 87:1290.0 88:826.0 89:171.0 90:349.0 91:794.0 92:175.0 93:16.0 94:755.0 98:386.0 99:226.0 100:8033.0 101:1381.0 102:1524.0 103:1205.0 104:425.0 105:143.0 106:393.0 107:239.0 108:12.0 111:7.0 112:401.0 113:1004.0 114:819.0 115:408.0 116:220.0 117:634.0 118:164.0 119:364.0 120:371.0 121:525.0 122:101.0 124:97.0 125:53.0 126:1504.0 127:324.0 128:185.0 129:1067.0 130:2254.0 131:17…	463	259833	36484	22731	90647	36004	173939	307789	323551	102676	3116	266062	1389666	94043	27700	157241	586708	477599	65654	118592	992120	610745	45	1516331	294074	5176	91601	161081	2512976	555714	8136	136380	49177
2.49_298.10	298.097	2.493	5'-Methylthioadenosine	Nucleosides, nucleotides, and analogues	5'-deoxyribonucleosides	5'-deoxy-5'-thionucleosides	5'-deoxy-5'-thionucleosides	nucleoside metabolite	1	HILIC ESI+	[M+H]+	C11H15N5O3S	WUUGFSXJNOTRMR-IOSLPCCCSA-N	CSC[C@@H]1[C@H]([C@H]([C@@H](O1)N2C=NC3=C2N=CN=C3N)O)O	439176	61.01084:26293 66.36467:1957 75.02612:12447 97.02844:15276 98.93249:2055 101.62106:2366 136.06174:365042 145.03217:15295 163.04169:12231 234.82452:2231 264.4585:2300 298.09705:45018	85018	nd	108648	248139	nd	2666732	10885	nd	nd	nd	352574	35676	3931	158366	119734	512089	331139	269302	12126	nd	nd	nd	26848	133611	nd	403257	nd	28854	227442	nd	310133	95219	100657
4.37_257.08	257.078	4.365	5-Methyluridine	Nucleosides, nucleotides, and analogues	Pyrimidine nucleosides		Pyrimidine nucleosides	nucleoside metabolite	1	HILIC ESI-	[M-H]-	C10H14N2O6	DWRXFEITVBNRMK-JXOAFFINSA-N	CC1=CN(C(=O)NC1=O)[C@H]2[C@@H]([C@@H]([C@H](O2)CO)O)O	445408	53.19907:2165 65.66941:2380 66.95411:1946 75.52533:2208 79.02387:2022 80.04916:2920 85.96125:2202 95.28232:1901 96.04423:3513 124.03928:47434 125.03433:42416 167.04527:48278 197.08116:2414 199.18813:4779 209.35118:2138 210.94855:3450 214.07097:10563 220.84462:2475 235.25508:2102 257.07803:84810 257.10446:4998 257.12891:2605	47984	382832	3807	24563	7666	85098	47455	20885	10200	605	108423	272369	113264	34096	19132	13311	nd	nd	236441	53318	16734	8190	216680	172941	128311	265815	59266	5090	93511	23561	1814	300466	39075
33458	319	596111	6-deoxyglucitol	Organic oxygen compounds	Organooxygen compounds	Carbohydrates and carbohydrate conjugates	Monosaccharides	sugar alcohols	1	GCMS		C6H14O5	SKCKOFZKJLZSFA-JGWLITMVSA-N	C[C@H]([C@H]([C@@H]([C@H](CO)O)O)O)O	151266	85:700.0 86:543.0 87:861.0 88:477.0 89:2187.0 90:170.0 91:80.0 95:702.0 98:1.0 99:585.0 100:206.0 101:3261.0 102:617.0 103:11118.0 104:1086.0 105:590.0 107:33.0 110:22.0 111:180.0 112:30.0 113:432.0 114:101.0 115:1563.0 116:1327.0 117:44565.0 118:4828.0 119:2295.0 120:120.0 121:2.0 123:33.0 125:17.0 127:236.0 128:1.0 129:11360.0 130:1455.0 131:5741.0 132:609.0 133:5630.0 134:701.0 135:477.0 140:2…	247	2208	405	596	427	1562	821	153	1181	430	235	339	1425	608	411	430	196	953	935	809	1862	2656	108	385	365	130	168	129	211	217	83	104	1576
85102	117	573663	6-deoxyglucose	Organic oxygen compounds	Organooxygen compounds	Carbohydrates and carbohydrate conjugates	Monosaccharides	nucleoside metabolite	1	GCMS		C6H12O5	PNNNRSAQSRJVSB-JGWLITMVSA-N	C[C@H]([C@H]([C@@H]([C@H](C=O)O)O)O)O	441480	85:1382.0 86:894.0 87:839.0 88:367.0 89:5317.0 90:407.0 91:305.0 95:82.0 96:126.0 97:153.0 98:192.0 99:868.0 100:2605.0 101:2321.0 102:1181.0 103:5551.0 104:561.0 105:2504.0 106:242.0 107:146.0 108:149.0 109:70.0 110:120.0 111:250.0 112:338.0 113:533.0 114:1548.0 115:2124.0 116:1054.0 117:90320.0 118:9236.0 119:3823.0 120:191.0 121:50.0 122:58.0 124:133.0 125:98.0 126:205.0 127:703.0 128:771.0 12…	840441	399474	257441	62442	311709	184752	225354	103791	89377	19077	27733	2503100	97541	433012	653367	44997	9614	34606	917224	151050	42656	35189	761713	53143	381250	2157426	35907	962853	43250	146195	13156	2853638	174921
1.31_152.07	152.07	1.315	Acetaminophen	Benzenoids	Phenols	1-hydroxy-2-unsubstituted benzenoids	1-hydroxy-2-unsubstituted benzenoids	drugs	1	HILIC ESI+	[M+H]+	C8H9NO2	RZVAJINKPMORJF-UHFFFAOYSA-N	CC(=O)NC1=CC=C(C=C1)O	1983	59.04938:93780 93.0216:1958 96.0807:24496 106.06458:2107 110.06001:315093 117.09073:10823 118.26679:1804 124.07545:9828 132.69067:2486 134.05954:11731 134.09578:3284 152.07042:476704 152.10612:14925	75608	117806	72084	80989	54410	164181	57614	274460	177185	72991	80398	110694	104348	94648	60617	88030	43821	66215	68098	54928	58071	47329	88750	139426	143411	137796	108164	71657	62852	46772	77770	85077	62964
AA			Acetic Acid	Organic acids and derivatives	Carboxylic acids and derivatives	Carboxylic acids	Carboxylic acids	SCFAs	1	SCFA_GC		C2H4O2	QTBSBXVTEAMEQO-UHFFFAOYSA-N	CC(=O)O	176		828	3274	857	468	2859	785	994	2085	1996	1407	811	3226	3720	630	690	1399	1479	2216	1499	2201	1846	1841	679	2380	2468	2029	2458	1385	2258	2084	276	2111	1686
7.17_204.12	204.123	7.166	Acetylcarnitine	Lipids and lipid-like molecules	Fatty Acyls	Fatty acid esters	Acyl carnitines	carnitines	1	HILIC ESI+	[M]+	C9H18NO4	RDHQFKQIGNGIED-MRVPVSSYSA-O	CC(=O)O[C@H](CC(=O)O)C[N+](C)(C)C	439756	60.04496:2612 60.08096:23908 67.34689:2127 70.06522:3239 84.04432:10918 85.02836:98994 98.06024:2149 109.07582:13502 113.11548:4687 123.08089:4581 126.05503:21542 127.3514:2082 128.67476:2384 129.13896:3355 130.14207:11786 138.05505:18463 144.06512:16748 145.04932:20786 151.07591:2421 168.06488:2697 181.8844:2463 186.05833:2077 186.07629:3631 186.11272:9858 187.09624:4784 203.17651:3224 204.12358…	173451434	805994	2760203	82965035	159876	1974625949	268694	13378520	10973787	155615	1328626	862822	855711	82375918	8249564	15286512	10575258	31674254	5216828	3004052	1733863	1074626	6391671	293770	3003262	32288903	598290	11848475	218735	3782439	18216049	10553194	5374971
8.38_159.08	159.077	8.381	Ala-Ala	Organic acids and derivatives	Carboxylic acids and derivatives	Amino acids, peptides, and analogues	Peptides	di-peptides	1	HILIC ESI-	[M-H]-	C6H12N2O3	DEFJQIDDEAULHB-QWWZWVQMSA-N	C[C@H](C(=O)N[C@H](C)C(=O)O)N	5460362	57.67804:1810 58.47054:1996 60.60439:1700 61.98706:7762 62.55013:2092 83.42344:1931 87.05521:4622 88.03922:39552 97.06428:2883 98.02394:2978 98.05946:2572 103.97324:1849 114.93314:2764 115.08653:23157 116.03415:3186 116.92762:8867 138.75026:1886 156.49263:1901 156.88063:1686 158.75:2092 159.07693:61861 159.10039:2418	890471	1997054	705467	1528026	64283	286069	129747	2712194	2337334	45046	309778	1297623	1189383	947593	832358	1266554	641048	1140211	2736214	2174007	4478001	2127277	4574805	1150052	4155220	4373197	327427	340733	1936141	2042352	728617	1752079	1826659
7.72_203.14	203.139	7.719	Ala-Ile	Organic acids and derivatives	Carboxylic acids and derivatives	Amino acids, peptides, and analogues	Peptides	di-peptides	1	HILIC ESI+	[M+H]+	C9H18N2O3	ZSOICJZJSRWNHX-ACZMJKKPSA-N	CC[C@H](C)[C@@H](C(=O)[O-])NC(=O)[C@H](C)[NH3+]	7408078	50.25323:5030 86.09655:303944 97.02855:21932 100.0758:80903 105.07471:5492 114.09169:8936 132.10214:49299 203.0528:2388459 203.13754:54727	674680	1019586	890895	1101709	263758	523207	251121	429109	523622	380274	413788	644861	538261	1028485	1627204	629537	461097	325364	694673	505451	269151	210856	1974607	715530	836425	1234809	793348	683816	1486711	708042	1116163	792754	549651
8.65_177.06	177.062	8.655	Allantoic acid	Organic acids and derivatives	Carboxylic acids and derivatives	Amino acids, peptides, and analogues	Amino acids and derivatives	oligopeptides	1	HILIC ESI+	[M+H]+	C4H8N4O4	NUCLJNSWZCHRKL-UHFFFAOYSA-N	C(C(=O)O)(NC(=O)N)NC(=O)N	203	61.03986:120774 74.02367:16041 85.65791:2080 86.99673:2063 95.01283:10570 117.02964:19521 129.01842:2220 134.05608:9489 141.0172:2716 141.28949:2102 149.02322:2116	392106	603139	79252	133064	nd	708045	17230	49561	2180	nd	583493	209389	nd	295631	13618	43454	99376	138131	3042	8248	55934	28280	45026	nd	46426	141003	nd	7069	nd	25103	nd	63230	55303
5.67_157.04	157.036	5.673	Allantoin	Organoheterocyclic compounds	Azoles	Imidazoles	Imidazoles	hydantoins	1	HILIC ESI-	[M-H]-	C4H6N4O3	POJWUDADGALRAB-UHFFFAOYSA-N	C1(C(=O)NC(=O)N1)NC(=O)N	204	56.58817:2210 57.97437:2820 61.98722:3152 71.02386:3350 97.00314:47201 113.05977:4204 114.02975:35458 140.0092:2674 156.99568:3251 157.03625:3598 157.0498:3464 157.08688:2374	8157876	936264	2499090	4560284	2851	35544869	71316	170890	48015	5764	10417537	813609	77298	3744697	1344277	659749	594811	2621826	431823	236303	271991	325226	10194217	10964	221691	1740478	205716	92023	141016	102015	1954357	895736	1114842
418006	118	182466	allylbenzene	Benzenoids	Benzene and substituted derivatives		Benzene and substituted derivatives	phenolic natural products	1	GCMS		C9H10	HJWLCRVIBGQPNF-UHFFFAOYSA-N	C=CCC1=CC=CC=C1	9309	85:304.0 86:108.0 91:1809.0 102:729.0 103:4473.0 104:257.0 114:32.0 115:2983.0 116:472.0 117:6101.0 118:6165.0 119:280.0 125:48.0 128:190.0 137:70.0 139:40.0 143:99.0 144:50.0 149:94.0 150:51.0 157:71.0 158:35.0 161:49.0 162:32.0 171:66.0 172:27.0 176:25.0 213:51.0 219:38.0 227:15.0 240:16.0 245:23.0 286:15.0 310:11.0 317:13.0 322:12.0 323:15.0 351:14.0 354:12.0 361:13.0 383:13.0 385:14.0 386:18.…	1017161	28206	1897791	871248	22693	349	4557	1426537	20781	3105932	539264	608656	1812660	1634689	3322	1763581	1584850	1924242	1185076	1169333	1206040	1651773	492940	1393	947	208343	2654878	668750	1348	1142247	227328	455369	1021792
413	218	455754	aminomalonate	Organic acids and derivatives	Carboxylic acids and derivatives	Amino acids, peptides, and analogues	Amino acids and derivatives	malonates	1	GCMS		C3H5NO4	JINBYESILADKFW-UHFFFAOYSA-N	C(C(=O)O)(C(=O)O)N	100714	86:2942.0 88:141.0 89:112.0 91:83.0 95:21.0 96:52.0 99:117.0 100:1404.0 101:500.0 102:258.0 103:262.0 105:161.0 113:119.0 114:63.0 115:110.0 116:295.0 117:454.0 119:188.0 120:63.0 121:40.0 122:45.0 131:1530.0 132:103.0 133:2100.0 134:376.0 143:19.0 144:92.0 147:5888.0 148:433.0 149:305.0 152:37.0 154:11.0 158:171.0 160:45.0 161:81.0 164:29.0 167:17.0 173:76.0 174:1023.0 175:272.0 176:72.0 178:67.…	1151	7687	2628	1777	15682	3364	12045	27787	3554	1366	1127	5750	43568	1830	3593	34310	12587	35674	15905	25744	3738	13740	5487	15396	45747	25048	1435	35391	74413	18316	238	9024	26814
9.56_239.11	239.115	9.559	Anserine	Organic acids and derivatives	Peptidomimetics	Hybrid peptides	Hybrid peptides	di-peptides	1	HILIC ESI-	[M-H]-	C10H16N4O3	MYYIAHXIVFADCU-QMMMGPOBSA-N	CN1C=NC=C1C[C@@H](C(=O)O)NC(=O)CCN	112072	52.47893:3203 58.02844:1242518 70.02491:3668 70.02854:47907 72.00775:21858 87.05506:433420 93.04449:20291 99.05508:6052 137.07011:5028 149.07117:3664 151.05023:244943 161.8102:3272 166.09766:1342748 167.47766:4880 168.07681:4921880 178.09776:60658 195.12453:291154 221.104:3636 222.08774:4061 239.11464:3481096	35728	11471	nd	40882	247	96201	1153	231805	76873	30971	15761	14937	45827	46451	72935	104011	46473	235191	58589	245494	159233	62546	22912	18701	61586	22524	106023	92452	250554	109864	268100	63880	31785
7.10_151.06	151.06	7.101	Arabitol	Organic oxygen compounds	Organooxygen compounds	Carbohydrates and carbohydrate conjugates	Sugar alcohols	sugar alcohols	1	HILIC ESI-	[M-H]-	C5H12O5	HEBKCHPVOIAQTA-QWWZWVQMSA-N	C([C@H](C([C@@H](CO)O)O)O)O	94154		199814	769416	53051	73252	1939	1057687	71526	123403	95795	529	222040	799285	39152	116375	250999	105451	85951	182902	192018	480701	454246	523253	194162	38011	754220	270242	85001	95497	16851	255764	390976	153373	136325
9.51_173.10	173.103	9.509	Arginine	Organic acids and derivatives	Carboxylic acids and derivatives	Amino acids, peptides, and analogues	Amino acids and derivatives	amino acids, basic	1	HILIC ESI-	[M-H]-	C6H14N4O2	ODKSFYDXXFIFQN-BYPYZUCNSA-N	C(C[C@@H](C(=O)O)N)CN=C(N)N	28782	50.35566:2230 53.12614:1944 53.48004:1895 59.99658:1921 61.98717:2536 63.04182:1901 67.88161:1989 93.0336:5053 93.50167:2304 99.92466:3335 105.01824:1965 111.04414:5085 111.08036:2627 114.05504:7406 115.91915:3380 116.92749:4562 131.08162:534711 154.94629:43854 156.07697:24387 172.95705:8600 173.04512:14068 173.08063:2169 173.08546:2923 173.10387:72828 173.11955:5007	3367008	2820519	3531791	3685727	230829	7424341	383970	595295	697890	523452	2374239	952011	844631	3282843	6057572	1302741	312395	1250711	861142	1531367	1211617	875081	6094430	1744668	2639629	2866473	3100646	2614506	2904098	1413701	2121022	2034544	637356
8.77_133.06	133.06	8.769	Asparagine	Organic acids and derivatives	Carboxylic acids and derivatives	Amino acids, peptides, and analogues	Amino acids and derivatives	amino acids, basic	1	HILIC ESI+	[M+H]+	C4H8N2O3	DCXYFEDJOCDNAF-REOHCLBHSA-N	C([C@@H](C(=O)[O-])[NH3+])C(=O)N	6267	56.33714:115495 67.30817:118893 68.05377:133321 74.02352:165014 75.14009:142597 78.23864:120669 83.99737:128710	2629028	2589202	5689033	1938001	336413	2149976	354680	746510	621730	335603	15853712	1381161	502186	2472919	2499548	424580	640011	748502	1101234	881945	639544	702977	12623442	373832	886397	548528	600885	334925	923754	1573221	15415563	715003	483846
9.31_132.03	132.029	9.312	Aspartic acid	Organic acids and derivatives	Carboxylic acids and derivatives	Amino acids, peptides, and analogues	Amino acids and derivatives	amino acids	1	HILIC ESI-	[M-H]-	C4H7NO4	CKLJMWTZIZZHCS-REOHCLBHSA-N	C([C@@H](C(=O)O)N)C(=O)O	44367445	54.7011:24084 71.01249:25868 74.84116:20033 80.97041:21021 80.97679:19555 88.03921:152971 115.0025:44728 132.02925:39636	2674044	427423	520048	358424	30971	4502518	127273	51497	62109	27758	771097	191974	345790	624820	2012282	128282	35367	139216	115827	286395	229278	197833	3848911	409421	1186767	138695	984513	170911	466369	330832	1058925	207460	28572
8.19_279.10	279.099	8.186	Asp-Phe	Organic acids and derivatives	Carboxylic acids and derivatives	Amino acids, peptides, and analogues	Peptides	di-peptides	1	HILIC ESI-	[M-H]-	C13H16N2O5	YZQCXOFQZKCETR-UWVGGRQHSA-N	C1=CC=C(C=C1)C[C@@H](C(=O)O)NC(=O)[C@H](CC(=O)O)N	93078	58.02849:3629 70.02857:22094 71.01227:5186 71.02377:4230 72.00774:40390 72.99203:2646 82.02865:26520 85.03902:3475 91.054:24895 95.02388:21059 96.0078:10919 98.02366:22723 99.00768:12887 109.01575:125694 113.03443:238471 114.01875:5096 115.00242:4207 115.32116:2599 116.04915:3157 117.03362:5332 118.06517:24091 125.03461:15476 126.04234:490702 145.06474:10231 146.05969:4324 147.04413:180835 148.07…	67134	24339	114951	103170	nd	161645	4547	919	1643	4549	136980	10604	13328	95980	211978	4578	nd	4225	4257	8373	17077	853	151026	8180	7548	23066	40857	28033	40966	14334	66926	nd	1038
148	248	435564	beta-alanine	Organic acids and derivatives	Carboxylic acids and derivatives	Amino acids, peptides, and analogues	Amino acids and derivatives	amino acids	1	GCMS		C3H7NO2	UCMIRNVEIXFBKS-UHFFFAOYSA-N	C(CN)C(=O)O	239	85:228.0 86:3117.0 87:240.0 90:32.0 93:32.0 95:19.0 99:386.0 100:1891.0 101:337.0 102:313.0 103:237.0 104:118.0 107:63.0 113:116.0 114:91.0 117:236.0 119:17.0 120:39.0 129:105.0 130:635.0 133:1533.0 134:301.0 135:92.0 137:24.0 142:51.0 146:224.0 147:2196.0 148:431.0 160:346.0 161:56.0 162:41.0 164:29.0 168:16.0 170:19.0 172:67.0 173:3.0 174:3380.0 175:583.0 176:292.0 181:27.0 187:19.0 188:94.0 18…	952	4668	687	1153	18158	786	6907	5174	5266	10901	460	3103	706	1399	1890	6804	9859	4927	2927	6599	8214	5766	609	15214	8380	4606	28034	1745	7946	4751	725	5423	1742
100873	160	965352	beta-gentiobiose	Organic oxygen compounds	Organooxygen compounds	Carbohydrates and carbohydrate conjugates	Glycosyl compounds	sugars	1	GCMS		C12H22O11	DLRVVLDZNNYCBX-LIZSDCNHSA-N	C([C@@H]1[C@H]([C@@H]([C@H]([C@@H](O1)OC[C@@H]2[C@H]([C@@H]([C@H]([C@@H](O2)O)O)O)O)O)O)O)O	441422	85:1429.0 86:721.0 87:1340.0 88:666.0 89:9018.0 90:749.0 91:536.0 92:96.0 93:135.0 94:142.0 95:134.0 96:89.0 97:641.0 98:223.0 99:1242.0 100:2366.0 101:8618.0 102:2362.0 103:22500.0 104:1984.0 105:4901.0 106:339.0 107:183.0 109:858.0 110:33.0 111:683.0 112:262.0 113:1304.0 114:964.0 115:1755.0 116:4243.0 117:12702.0 118:1086.0 119:1415.0 120:139.0 121:184.0 125:66.0 126:100.0 127:843.0 128:487.0 …	31845	20277	54382	37537	6993	84234	6700	683	1306	3516	13654	9689	2828	10372	108087	1938	2864	5572	3078	1466	3784	2346	12607	1988	2352	6131	3240	10744	3872	1099	29936	3838	1717
7.20_118.09	118.086	7.196	Betaine	Organic acids and derivatives	Carboxylic acids and derivatives	Amino acids, peptides, and analogues	Amino acids and derivatives	trimethyl ammonium compounds	1	HILIC ESI+	[M+H]+	C5H11NO2	KWIUHFFTVRNATP-UHFFFAOYSA-N	C[N+](C)(C)CC(=O)[O-]	247		131282313	61800009	10448507	46497377	2593041	96859803	7360195	32614894	23332566	3422572	39608802	28097736	110976357	14904464	49879530	34118953	30642014	32661906	40636055	30336941	52151179	1320769	36245485	50666638	34492509	82218106	13490647	92428040	126785035	31999385	206321113	102646700	66542168
1.98_583.25	583.254	1.977	Biliverdin	Organoheterocyclic compounds	Tetrapyrroles and derivatives	Bilirubins	Bilirubins	bile pigments	1	HILIC ESI+	[M+H]+	C33H34N4O6	RCNSAJSGRJSBKK-NSQVQWHSSA-N	CC\1=C(/C(=C/C2=C(C(=C(N2)/C=C\3/C(=C(C(=O)N3)C)C=C)C)CCC(=O)O)/N/C1=C\C4=NC(=O)C(=C4C)C=C)CCC(=O)O	5280353	56.02993:3127 59.16666:2988 123.22318:3450 199.51195:13229 209.10754:4027 225.10184:6410 227.1179:12188 237.10211:10821 238.11067:13360 239.11876:3716 251.11745:3938 252.12434:3580 253.13327:23922 269.12845:30076 271.1088:23298 271.13977:4252 279.11288:21851 284.11566:6947 285.12463:6030 286.13165:3620 297.1235:798213 299.1395:61026 327.2373:2994 354.15765:3585 402.18134:5864 403.11053:3461 448.1…	648767	54021	113294	176199	nd	1542496	23136	102628	217348	69169	233654	40900	62254	7819	82468	87432	37304	210845	11254	126500	15824	131064	216835	86877	125727	356763	nd	486448	340425	238193	3150	85868	48557
2.94_245.10	245.095	2.936	Biotin	Organoheterocyclic compounds	Biotin and derivatives		Biotin and derivatives	imidazoles	1	HILIC ESI+	[M+H]+	C10H16N2O3S	YBJHBAHKTGYVGT-UHFFFAOYSA-N	C1C2C(C(S1)CCCCC(=O)O)NC(=O)N2	253	64.50601:2369 70.70124:2565 77.56447:2003 95.62498:1864 97.03986:3205 129.4104:2021 139.07571:1999 145.52458:1966 166.0685:4384 167.05252:3213 184.08009:2753 199.0883:4797 209.07448:9702 227.08467:299640 245.09431:63447	71403	3983	58202	10042	37899	114388	7326	119102	96637	129035	4284	8293	3545	37376	946339	804809	556520	599193	65419	244320	290645	245711	85037	63430	216341	69054	871517	20743	95638	112524	nd	2716	80207
342044	174	245240	butylamine	Organic nitrogen compounds	Organonitrogen compounds	Amines	Primary amines	biogenic polyamines	1	GCMS		C4H11N	HQABUPZFAYXKJW-UHFFFAOYSA-N	CCCCN	8007	86:56920.0 87:7197.0 88:16752.0 89:2368.0 90:448.0 91:1504.0 92:288.0 96:557.0 98:278.0 99:1172.0 100:32017.0 101:5705.0 102:5864.0 103:3693.0 104:390.0 105:5521.0 106:1628.0 108:168.0 110:10664.0 112:510.0 114:4580.0 115:3719.0 121:1127.0 122:287.0 123:876.0 124:74.0 126:1201.0 128:44795.0 129:6901.0 130:14133.0 131:4040.0 132:956.0 133:5021.0 134:1010.0 135:2146.0 136:162.0 137:1361.0 138:986.0…	2784	11822	3959	4869	18646	4900	1155	5303	5716	4766	1426	1357	3786	1586	4080	3413	3684	3526	1963	2751	3887	3462	1553	5655	5160	2172	3979	3429	4065	2217	273	1246	3253
BA			Butyric Acid	Lipids and lipid-like molecules	Fatty Acyls	Fatty acids and conjugates	Straight chain fatty acids	butyrates	1	SCFA_GC		C4H8O2	FERIUCNNQQJTOY-UHFFFAOYSA-N	CCCC(=O)O	264		132	567	233	38	1048	178	291	370	399	404	392	702	1871	57	48	120	244	122	436	1019	551	442	206	1281	669	288	971	303	653	498	41	146	167
1.98_179.03	179.034	1.983	Caffeic acid	Phenylpropanoids and polyketides	Cinnamic acids and derivatives	Hydroxycinnamic acids and derivatives	Hydroxycinnamic acids	phenolic natural products	1	HILIC ESI-	[M-H]-	C9H8O4	QAIPRVGONGVQAS-RQOWECAXSA-N	C1=CC(=C(C=C1/C=C\C(=O)O)O)O	1549111	52.25103:1906 59.68824:2083 89.53667:2243 107.04887:10066 134.03589:13628 134.61366:2544 135.04396:1799581 136.04762:8836 137.02235:7847 144.87048:4026 178.90276:2366 179.03412:641416	1417438	176514	148192	117430	38789	1587524	51860	79886	42846	21467	225767	227645	161457	170447	84902	53512	261867	517697	502175	362269	199259	565469	4278576	33184	152232	3582993	92755	1090259	1394655	57731	124156	284059	71716
50422	229	452386	capric acid	Lipids and lipid-like molecules	Fatty Acyls	Fatty acids and conjugates	Medium-chain fatty acids	saturated_FA	1	GCMS		C10H20O2	GHVNFZFCNZKVNT-UHFFFAOYSA-N	CCCCCCCCCC(=O)O	2969	86:58.0 95:73.0 100:128.0 115:203.0 116:59.0 117:1692.0 118:22.0 129:683.0 130:12.0 131:212.0 132:438.0 143:65.0 145:173.0 154:11.0 168:16.0 183:18.0 185:23.0 201:16.0 229:495.0 230:98.0 243:21.0 244:16.0 338:5.0 388:4.0 421:13.0 452:4.0 478:6.0 497:4.0	5492	3620	8089	13182	22391	3351	21457	4327	6307	10409	2088	1877	4593	4481	6191	5976	8196	7615	2820	4987	8168	4431	2923	14332	6627	4854	7860	10093	5540	3197	658	1919	4464
0.70_344.28	344.279	0.702	CAR 12:0	Lipids and lipid-like molecules	Fatty Acyls	Fatty acid esters	Acyl carnitines	carnitines	1	CSH ESI+	[M]+	C19H37NO4	FUJLYHJROOYKRA-QGZVFWFLSA-N	CCCCCCCCCCCC(=O)O[C@H](CC(=O)[O-])C[N+](C)(C)C	168381	71.08575:3979 75.39042:2747 75.39659:2227 83.08556:3784 85.02841:668970 85.10085:2968 89.05972:15776 94.97157:2836 95.08595:5376 97.10054:2542 100.11197:2763 100.69687:2413 109.10076:5201 119.59037:2653 129.1217:2591 133.08591:5033 144.10202:15494 183.17419:31484 199.18846:6332 200.19177:6380 201.19226:3331 202.81581:5041 215.0957:3024 217.19974:5276 218.20229:15213 219.20406:12600 235.32832:2350…	2558689	1078897	328453	2248701	97193	1506508	165024	289775	560127	66871	1410323	351944	82991	2321086	547863	333033	699716	1556493	176196	351610	112667	74428	395286	119128	121493	254442	95719	597190	120004	1066961	50428	137503	148756
0.75_370.29	370.295	0.75	CAR 14:1	Lipids and lipid-like molecules	Fatty Acyls	Fatty acid esters	Acyl carnitines	carnitines	1	CSH ESI+	[M]+	C21H39NO4	NNCBVXBBLABOCB-SEYXRHQNSA-N	CCCCCCCC/C=C\CCCC(=O)OC(CC(=O)[O-])C[N+](C)(C)C	22833575	74.09617:2212 78.00375:2302 81.07001:2603 83.0491:2571 85.0285:236583 95.08535:2921 105.06988:33607 106.07331:19654 109.10079:3016 121.06467:2462 121.10077:4464 135.11612:3587 144.10201:5559 191.17935:4804 196.93977:23515 209.19041:3145 311.22278:17269 314.12228:2880 365.62491:3035 370.29541:192115	1314057	400227	656685	1342803	10422	584814	14080	923602	1118538	nd	515395	161638	4621	1910556	305188	80580	114752	409230	779701	1525356	155974	240014	2870382	79240	210772	973251	nd	631560	nd	1939568	14300	127627	96342
1.58_400.34	400.342	1.581	CAR 16:0	Lipids and lipid-like molecules	Fatty Acyls	Fatty acid esters	Acyl carnitines	carnitines	1	CSH ESI+	[M]+	C23H45NO4	XOMRRQXKHMYMOC-OAQYLSRUSA-N	CCCCCCCCCCCCCCCC(=O)O[C@H](CC(=O)[O-])C[N+](C)(C)C	11953816	70.19205:2338 85.02856:267962 95.08513:2718 144.10231:3106 148.78294:2178 149.06009:3443 195.85422:2552 227.83002:2390 239.23628:11092 285.05688:2162 341.26947:22873 372.27942:2735 400.3421:210136	2228037	221194	553865	1715008	nd	1224544	11043	1351116	2422156	nd	384006	167217	6085	1377193	805547	270007	679007	974229	232310	1307514	118524	298587	1102078	267646	333824	451442	nd	2156466	147472	3989142	3298	67036	198307
2.37_428.37	428.373	2.367	CAR 18:0	Lipids and lipid-like molecules	Fatty Acyls	Fatty acid esters	Acyl carnitines	carnitines	1	CSH ESI+	[M]+	C25H49NO4	FNPHNLNTJNMAEE-UHFFFAOYSA-N	CCCCCCCCCCCCCCCCCC(=O)OC(CC(=O)[O-])C[N+](C)(C)C	6426855	74.09632:3273 76.73795:2365 85.02836:172761 127.80323:2184 144.10201:5167 202.95711:3814 273.89658:2467 320.31189:2310 357.96146:2353 369.29944:20619 428.37253:165839	573412	111511	226517	547599	66677	370745	63873	1977307	2376925	183427	105720	83057	54081	463922	536765	346580	774607	1130876	135974	399133	314794	322853	336553	137858	185778	218346	128998	2171958	581348	3032868	69076	85041	124886
1.74_426.36	426.357	1.741	CAR 18:1	Lipids and lipid-like molecules	Fatty Acyls	Fatty acid esters	Acyl carnitines	carnitines	1	CSH ESI+	[M]+	C25H47NO4	HITOYGLMAFIRNI-YSESTWPTSA-N	CCCCCC/C=C/CCCCCCCCCC(=O)O[C@@H](CCC(=O)[O-])[N+](C)(C)C	53477830	71.1754:2207 83.08532:2985 85.02856:266023 86.91395:2312 95.08601:3067 97.10137:3643 109.10132:2763 144.10245:4079 149.1339:2288 198.98349:11964 199.95062:2431 355.26337:44865 367.28491:10245 373.27365:10158 391.63876:2621 426.35806:249096	2893272	623399	849738	4493824	nd	1382812	34283	2494545	2798072	nd	784014	268647	4350	3844568	921387	392551	726756	850918	1045948	4488853	1338623	2862444	5630645	1347180	1760290	1897158	nd	2526870	36622	7249728	nd	150137	605453
1.31_424.34	424.341	1.31	CAR 18:2	Lipids and lipid-like molecules	Fatty Acyls	Fatty acid esters	Acyl carnitines	carnitines	1	CSH ESI+	[M]+	C25H45NO4	MJLXQSQYKZWZCB-DQFWFXSYSA-N	CCCCC/C=C\C/C=C\CCCCCCCC(=O)O[C@H](CC(=O)[O-])C[N+](C)(C)C	6450015	73.0879:2243 76.62832:2678 81.07001:3739 83.08546:11244 83.22279:2523 85.02855:187285 89.05949:3906 91.82194:2279 95.08562:3394 97.10085:3389 109.10117:3227 144.10223:4815 168.82147:2291 201.40186:5134 201.42139:4613 239.14949:3781 263.23639:2901 320.12265:2381 386.35999:2410 424.34235:182317	1414509	225205	573696	1244871	nd	628376	6941	190293	356136	nd	263345	52260	nd	1096473	293896	72938	192541	255977	259346	1240178	166004	290944	2662833	891072	726102	940674	nd	1086222	nd	2931930	nd	28125	173198
7.76_162.11	162.112	7.76	Carnitine	Organic nitrogen compounds	Organonitrogen compounds	Quaternary ammonium salts	Carnitines	trimethyl ammonium compounds	1	HILIC ESI+	[M+H]+	C7H15NO3	PHIQHXFUZVPYII-ZCFIWIBFSA-N	C[N+](C)(C)C[C@@H](CC(=O)[O-])O	10917	52.73667:1804 54.64476:2295 60.08107:40882 60.17365:1703 74.05984:2065 85.02812:4703 102.09135:12136 103.03906:46416 111.14674:2247 131.0377:2013 162.11243:249392	103229045	3776624	4190114	42084071	1037414	1313494788	1585165	21177148	16411952	1856052	2659407	3986714	4026272	70384375	9766713	10559213	17403417	25472740	5216670	6783590	11943047	7697540	7828052	1149415	13540226	19558639	2860062	8624208	6251846	7536968	11107273	9075551	8589019
9.60_225.10	225.099	9.603	Carnosine	Organic acids and derivatives	Peptidomimetics	Hybrid peptides	Hybrid peptides	di-peptides	1	HILIC ESI-	[M-H]-	C9H14N4O3	CQOVPNPJLQNMDC-ZETCQYMHSA-N	C1=C(NC=N1)C[C@@H](C(=O)[O-])NC(=O)CC[NH3+]	439224	55.50179:1842 65.72569:1783 67.02895:3537 87.05513:2559 88.03915:22410 93.04484:3861 110.07123:144511 110.09424:2489 115.05048:2192 123.61648:2454 127.05014:10124 128.66718:2141 136.09871:2111 137.03433:2674 140.88007:2038 145.82422:2078 147.3947:2218 153.79181:2226 154.06123:185335 156.66541:1864 161.08247:2628 163.09793:21502 181.10873:16792 207.08755:3594 225.09892:158848	332435	164592	527003	859828	2127	416598	20772	846518	962829	23576	47489	49839	73976	641410	1092167	702962	158974	617920	229465	446332	208556	104669	710182	234708	141066	142177	208152	410603	408544	369031	317469	124541	43129
11.05_673.59	673.589	11.05	CE 18:1	Lipids and lipid-like molecules	Steroids and steroid derivatives	Steroid esters	Cholesteryl esters	cholesterols	1	CSH ESI+	[M+Na]+	C45H78O2	RJECHNNFRHZQKU-RMUVNZEASA-N	CCCCCCCC/C=C\CCCCCCCC(=O)O[C@H]1CC[C@@]2([C@H]3CC[C@]4([C@H]([C@@H]3CC=C2C1)CC[C@@H]4[C@H](C)CCCC(C)C)C)C	5283632	101.73006:2830 103.92015:2992 106.60305:3024 146.56277:2542 147.11725:3655 202.99261:8842 305.24527:41214 350.11508:2958 369.35229:4872 370.32373:2802 436.24182:3088 527.36914:2953 628.17804:3228 673.58942:149810	nd	nd	nd	nd	nd	nd	nd	nd	nd	nd	nd	nd	nd	nd	nd	nd	nd	nd	nd	nd	nd	nd	nd	1163207	nd	nd	nd	nd	nd	nd	nd	nd	nd
10.59_666.62	666.618	10.594	CE 18:2	Lipids and lipid-like molecules	Steroids and steroid derivatives	Steroid esters	Cholesteryl esters	cholesterols	1	CSH ESI+	[M+NH4]+	C45H76O2	NAACPBBQTFFYQB-LJAITQKLSA-N	CCCCC/C=C\C/C=C\CCCCCCCC(=O)O[C@H]1CC[C@@]2([C@H]3CC[C@]4([C@H]([C@@H]3CC=C2C1)CC[C@@H]4[C@H](C)CCCC(C)C)C)C	5287939	81.07006:3695 83.08568:3689 95.08545:3696 101.0148:2876 102.12772:3104 105.06905:2958 109.10143:5922 112.23081:2500 114.74171:3348 125.39823:3516 135.11703:3158 147.11681:11137 161.13321:12758 178.83713:3353 187.15015:3102 200.95398:4062 202.77464:3096 202.79335:3739 235.02791:2976 323.79285:2954 369.34998:66392 461.78326:3240 499.14096:2837 666.73566:2960	nd	nd	nd	nd	nd	nd	nd	nd	nd	nd	nd	nd	nd	nd	nd	nd	nd	nd	nd	nd	nd	nd	nd	4742990	nd	nd	nd	nd	3062	nd	nd	nd	nd
10.08_714.62	714.619	10.081	CE 22:6	Lipids and lipid-like molecules	Steroids and steroid derivatives	Steroid esters	Cholesteryl esters	cholesterols	1	CSH ESI+	[M+NH4]+	C49H76O2	VOEVEGPMRIYYKC-HNJOWPRISA-N	CC/C=C\C/C=C\C/C=C\C/C=C\C/C=C\C/C=C\CCC(=O)O[C@H]1CC[C@@]2([C@H]3CC[C@]4([C@H]([C@@H]3CC=C2C1)CC[C@@H]4[C@H](C)CCCC(C)C)C)C	14274978	71.08537:21482 79.05437:3787 81.06995:79895 83.08572:42384 85.10109:17582 86.00717:3865 91.05441:7962 91.17738:2988 93.07011:28482 95.08558:89721 97.10143:36383 105.06985:19854 107.08549:35443 109.09384:5240 109.10136:103979 111.11699:32660 119.08568:27987 121.10133:47888 123.11697:47656 125.13264:13207 127.21124:3234 133.10121:42844 135.11693:122793 137.13243:21622 145.10083:5628 147.11684:18527…	nd	nd	nd	nd	nd	nd	nd	nd	nd	nd	nd	nd	nd	nd	nd	nd	nd	nd	nd	nd	nd	nd	nd	24472	nd	nd	nd	nd	nd	nd	nd	nd	nd
1373	204	932179	cellobiose	Organic oxygen compounds	Organooxygen compounds	Carbohydrates and carbohydrate conjugates	Glycosyl compounds	sugars	1	GCMS		C12H22O11	GUBGYTABKSRVRQ-QUYVBRFLSA-N	C([C@@H]1[C@H]([C@@H]([C@H]([C@H](O1)O[C@@H]2[C@H](O[C@H]([C@@H]([C@H]2O)O)O)CO)O)O)O)O	6255	85:169.0 86:40.0 87:224.0 89:1164.0 93:16.0 95:81.0 96:78.0 97:144.0 99:39.0 100:142.0 101:420.0 102:239.0 103:2566.0 104:303.0 105:530.0 107:39.0 108:20.0 113:215.0 114:2.0 115:122.0 116:171.0 117:1882.0 119:55.0 123:25.0 125:56.0 127:215.0 129:1861.0 130:230.0 131:535.0 132:80.0 133:993.0 141:125.0 142:21.0 143:419.0 144:69.0 145:87.0 146:72.0 147:5903.0 148:921.0 149:340.0 155:337.0 156:102.0 …	12695	6715	107437	53743	7536	31082	8054	7793	2824	16458	225107	36723	53402	22840	8509	39002	7739	12234	53105	4680	7219	4558	4428	4887	3495	15238	56081	3609	3177	4326	1707095	3141	12962
5.08_508.47	508.473	5.075	Cer 32:1;2O|Cer 16:1;2O/16:0	Lipids and lipid-like molecules	Sphingolipids	Ceramides	Long-chain ceramides	unsaturated_ceramides	1	CSH ESI-	[M-H]-	C32H63NO3	PIVKMDKERPTVGC-UHFFFAOYSA-N	O=C(NC(CO)C(O)C=CCCCCCCCCCCC)CCCCCCCCCCCCCCC		75.5558:2755 78.03677:2808 79.64978:3138 95.1012:2790 109.23618:2897 113.72997:3269 116.77723:3369 175.30009:2746 203.23671:5054 207.17499:6778 209.1906:305077 211.20618:13196 222.22304:11666 223.20749:3862 225.22192:12354 226.21741:53750 227.20088:38092 235.20656:148957 237.22206:303034 238.21725:44678 240.23399:18508 244.83191:3228 252.23328:280654 253.22093:3885 253.25383:26498 254.24887:17908…	144429	nd	nd	28375	nd	14060	nd	40428	47304	nd	nd	nd	nd	nd	nd	nd	13114	12370	nd	nd	8930	6757	22714	177632	41940	nd	nd	nd	nd	44616	nd	nd	nd
5.41_582.51	582.51	5.407	Cer 33:1;2O	Lipids and lipid-like molecules	Sphingolipids	Ceramides	Long-chain ceramides	unsaturated_ceramides	1	CSH ESI-	[M+CH3COO]-	C33H65NO3	QBFXCLDNTKBAPQ-STSAHMJASA-N	CCCCCCCCCCCCCCCCC(=O)N[C@@H](CO)[C@@H](/C=C/CCCCCCCCCCC)O	52931112	155.89366:6584 162.38812:7768 181.15891:110895 195.17435:44705 199.54703:40161 207.1747:83295 210.18573:30097 212.20157:7003 213.20444:7140 221.19118:37003 223.20593:16108 237.22096:9075 239.01425:6605 249.22144:9498 255.23425:6818 265.25409:36763 279.26889:111978 280.26376:39763 282.27982:41569 283.26398:14825 296.29593:108443 297.27899:60358 308.29575:183499 322.31113:422094 324.29077:16193 338…	434571	nd	44990	217914	nd	133237	nd	426272	284909	28395	nd	103876	nd	5783	96586	20885	339942	125217	nd	120483	113339	181907	177091	692420	615427	97594	30352	23010	82230	462466	nd	13035	16549
5.18_594.51	594.51	5.18	Cer 34:2;2O	Lipids and lipid-like molecules	Sphingolipids	Ceramides	Long-chain ceramides	unsaturated_ceramides	1	CSH ESI-	[M+CH3COO]-	C34H65NO3	XXWRZIYYFPIQHE-XPAOSYCESA-N	CCCCCCCCCCCCCCCC(=O)N[C@@H](CO)[C@@H](/C=C/CCCCCCCC/C=C\CCC)O	52931118	71.77341:2545 73.27695:2436 168.04741:2487 179.26672:2781 201.97359:10399 209.19032:13799 235.20528:19013 237.22198:15617 252.23293:4174 254.24875:6105 255.23268:6113 261.22253:3811 263.23798:12710 278.24805:18378 280.2648:47991 286.03717:2768 296.25946:4768 306.28015:35273 367.35776:12536 389.85239:2813 464.5816:2672 486.46344:13331 502.46597:4107 504.4798:13597 534.48895:195512 575.75726:3183	189615	nd	nd	54090	nd	129705	nd	317214	337474	18831	nd	nd	nd	15855	63100	nd	35032	34132	nd	163327	133759	82935	687093	406948	362188	19645	17477	18570	363496	563595	10992	nd	19319
7.17_592.57	592.567	7.169	Cer 38:1;2O|Cer 16:1;2O/22:0	Lipids and lipid-like molecules	Sphingolipids	Ceramides	Long-chain ceramides	unsaturated_ceramides	1	CSH ESI-	[M-H]-	C38H75NO3	RIGQYOKCOHPLTC-UHFFFAOYSA-N	O=C(NC(CO)C(O)C=CCCCCCCCCCCC)CCCCCCCCCCCCCCCCCCCCC		80.02485:4110 80.74928:3378 138.15224:2822 203.26562:3382 209.19048:158309 211.20558:4062 222.2222:4288 235.20657:86425 237.2222:50547 238.21732:28175 240.23244:15321 263.23779:27695 265.25293:5716 266.24915:5361 293.28513:55187 308.29407:21276 309.13821:3266 310.31107:39669 311.29694:26492 321.3158:154334 336.32712:176849 337.34842:15365 338.34314:96837 339.32666:72882 350.3429:11640 352.32162:1…	nd	nd	nd	7936	nd	16572	nd	nd	nd	nd	nd	nd	nd	nd	nd	nd	nd	nd	nd	nd	nd	nd	nd	36895	nd	nd	nd	nd	nd	nd	nd	nd	nd
6.39_606.55	606.547	6.392	Cer 38:2;3O|Cer 18:2;2O/20:0;(2OH)	Lipids and lipid-like molecules	Sphingolipids	Ceramides	Long-chain ceramides	unsaturated_ceramides	1	CSH ESI-	[M-H]-	C38H73NO4	VEFFHOUFMFSQDR-UHFFFAOYSA-N	O=C(NC(CO)C(O)C=CCCC=CCCCCCCCCC)C(O)CCCCCCCCCCCCCCCCCC		70.02853:5819 70.11819:2925 72.044:14234 87.54474:2878 88.03902:6520 95.0488:5166 102.68414:3182 201.25386:7290 217.19571:4560 235.20674:63679 237.22153:23660 248.23782:22229 260.23825:6066 261.22202:26498 264.23325:63289 266.24902:74472 278.24866:20816 279.26935:4677 281.28485:361712 295.29996:5069 296.25934:30443 306.24475:4149 309.27994:116086 311.29617:12157 322.31287:5568 324.25446:5480 326.…	11390	nd	nd	48259	nd	9221	nd	nd	nd	nd	nd	9221	nd	nd	nd	nd	nd	nd	6786	16981	7130	7148	125996	272386	nd	nd	nd	nd	nd	7903	nd	5418	nd
7.51_606.58	606.583	7.51	Cer 39:1;2O|Cer 16:1;2O/23:0	Lipids and lipid-like molecules	Sphingolipids	Ceramides	Long-chain ceramides	unsaturated_ceramides	1	CSH ESI-	[M-H]-	C39H77NO3	WYSRACVJQVNCRW-UHFFFAOYSA-N	O=C(NC(CO)C(O)C=CCCCCCCCCCCC)CCCCCCCCCCCCCCCCCCCCCC		95.04897:4073 102.57497:3399 107.17468:3203 111.28222:2947 127.984:3288 209.19052:214107 211.20752:4760 222.22221:4612 223.20605:20541 235.17853:4825 235.20648:135361 237.22362:3877 238.21718:42498 240.23314:14674 249.22157:15691 252.23529:3781 263.24326:3545 270.24445:3954 285.5921:3037 304.20901:3899 305.05902:3000 321.31628:27464 335.33209:208808 338.34247:16555 339.32599:12381 350.34451:25946…	nd	nd	nd	13752	nd	nd	nd	nd	nd	nd	nd	nd	nd	nd	nd	nd	nd	nd	nd	nd	nd	nd	nd	7671	nd	nd	nd	nd	nd	nd	nd	nd	nd
8.05_682.64	682.636	8.052	Cer 40:0;2O	Lipids and lipid-like molecules	Sphingolipids	Ceramides	Long-chain ceramides	saturated_ceramides	1	CSH ESI-	[M+CH3COO]-	C40H81NO3	SXPRAKSDHOEHIG-ZESVVUHVSA-N	CCCCCCCCCCCCCCCCCCCCCC(=O)N[C@@H](CO)[C@@H](CCCCCCCCCCCCCCC)O	5283575	79.46184:2966 93.97507:2545 119.94406:3084 203.32698:5538 239.23685:6716 262.60959:2827 321.31628:12600 339.32654:6924 364.35797:53045 380.35324:4936 495.81506:2917 574.59058:19228 590.58521:22664 622.61407:145528 682.61475:4642	324444	nd	nd	540830	nd	192826	nd	97202	195733	nd	nd	203343	nd	56911	8419	10567	nd	46912	nd	60038	33679	30275	126290	435363	17334	22624	8758	nd	34486	69629	nd	15906	9204
7.15_678.60	678.605	7.151	Cer 40:2;2O Isomer A	Lipids and lipid-like molecules	Sphingolipids	Ceramides	Long-chain ceramides	unsaturated_ceramides	1	CSH ESI-	[M+CH3COO]-	C40H77NO3	HILTUFAERVOALR-MQXYEJFFSA-N	CCCCCCCCCCCCCCCCCCCCCC(=O)N[C@@H](CO)[C@@H](/C=C/CCCCCCCC/C=C\CCC)O	52931123	83.0239:7473 85.00292:9928 85.80825:5155 141.03458:5853 142.35155:4948 169.24141:4951 209.17027:8539 209.19078:126504 235.20662:82918 237.22234:112352 238.21693:25661 240.23311:7747 241.72394:4756 263.23825:74598 265.78253:5204 266.24918:19823 268.26471:8627 304.20834:6894 319.30109:100566 331.95917:5129 336.32715:84770 337.31119:78424 347.33224:98862 362.34305:462768 364.35843:77067 365.3421:556…	45352	nd	nd	131819	nd	22322	nd	46938	22789	nd	nd	15857	nd	9454	nd	nd	nd	10681	nd	nd	nd	nd	114778	705080	17018	nd	nd	nd	22570	nd	nd	nd	nd
7.25_678.60	678.605	7.251	Cer 40:2;2O Isomer B	Lipids and lipid-like molecules	Sphingolipids	Ceramides	Long-chain ceramides	unsaturated_ceramides	1	CSH ESI-	[M+CH3COO]-	C40H77NO3	HILTUFAERVOALR-MQXYEJFFSA-N	CCCCCCCCCCCCCCCCCCCCCC(=O)N[C@@H](CO)[C@@H](/C=C/CCCCCCCC/C=C\CCC)O	52931123	84.04044:2899 88.64727:2715 92.25507:2673 97.38389:2855 203.39229:4399 235.20525:9443 257.73352:3077 261.22202:4986 321.31668:6355 338.34021:3554 339.32465:4863 362.34293:10729 364.35928:40923 390.37418:11829 570.55884:4141 586.55377:4231 588.57233:12476 618.46912:6613 618.58319:150416	82018	15013	nd	117647	nd	22322	nd	42158	10155	nd	nd	28113	nd	9454	nd	nd	nd	10681	nd	nd	nd	nd	57915	414019	9726	nd	nd	nd	6308	8446	nd	nd	nd
8.15_694.64	694.636	8.149	Cer 41:1;2O Isomer A	Lipids and lipid-like molecules	Sphingolipids	Ceramides	Long-chain ceramides	unsaturated_ceramides	1	CSH ESI-	[M+CH3COO]-	C41H81NO3	NAJHAHQNQCNWOP-PUYNVXOJSA-N	CCCCCCCCCCCCCCCCCCCCCCC(=O)N[C@@H](CO)[C@@H](/C=C/CCCCCCCCCCCCC)O	52931115	78.70522:2815 104.53675:2594 109.4932:3037 120.30668:3211 126.20193:3543 130.52895:2701 148.4561:3252 198.64215:3224 203.29659:2934 203.31598:9727 237.22125:22373 239.52617:3437 263.23795:12969 285.26154:2987 335.3316:17236 352.35855:12242 353.34314:12664 356.28281:3795 378.37479:58581 392.38995:3843 394.36777:5249 586.59094:5782 602.586:3840 604.59833:11666 634.61414:172712 694.61194:4771	393117	9457	nd	813742	nd	396908	9265	294622	323438	12265	nd	280496	nd	35777	nd	15249	nd	40814	15171	103687	10075	nd	125464	1156200	20661	8189	10029	52281	43013	136335	nd	21185	10292
8.67_710.67	710.667	8.673	Cer 42:0;2O	Lipids and lipid-like molecules	Sphingolipids	Ceramides	Long-chain ceramides	saturated_ceramides	1	CSH ESI-	[M+CH3COO]-	C42H85NO3	BPLYVSYSBPLDOA-WVILEFPPSA-N	CCCCCCCCCCCCCCCCCCCCCCCC(=O)N[C@@H](CO)[C@@H](CCCCCCCCCCCCCCC)O	5283577	83.47161:2866 162.83641:2927 165.22131:3117 197.86055:12918 239.23694:6806 254.08321:3210 301.62347:2753 349.34741:14384 366.37546:3520 392.39011:53952 408.38501:6397 602.62836:13284 618.61871:13747 650.64612:142495	281279	11948	nd	454668	nd	179335	nd	48719	76133	nd	nd	125446	nd	36590	11048	nd	nd	nd	nd	34450	24759	15569	122991	392266	16966	28058	8364	nd	26450	39494	nd	23105	nd
7.80_724.65	724.647	7.802	Cer 42:1;3O|Cer 18:1;3O/24:0 Isomer B	Lipids and lipid-like molecules	Sphingolipids	Ceramides	Long-chain ceramides	unsaturated_ceramides	1	CSH ESI-	[M+CH3COO]-	C42H83NO4	WLPNRZCQBKEKIH-UHFFFAOYSA-N	O=C(NC(CO)C(O)C(O)CCCC=CCCCCCCCCC)CCCCCCCCCCCCCCCCCCCCCCC		91.55511:3307 91.83601:2879 98.03604:5549 109.98158:2682 201.23759:3144 223.20819:3150 225.70447:2823 253.21648:6820 265.21747:75322 297.26691:2984 335.47809:3351 349.34824:5621 366.37347:44563 367.35791:68199 392.39056:33975 408.38522:50982 410.40079:125891 422.4007:114436 628.6048:18787 632.59583:3509 646.61536:7454 664.62537:317989 713.09753:3646	195649	nd	nd	250076	nd	63965	16016	61337	29366	nd	nd	510646	nd	nd	nd	nd	30596	75292	18582	212633	13371	51433	361840	401044	109982	74538	nd	105332	28808	19307	nd	nd	nd
7.80_706.64	706.636	7.8	Cer 42:2;2O Isomer A	Lipids and lipid-like molecules	Sphingolipids	Ceramides	Long-chain ceramides	unsaturated_ceramides	1	CSH ESI-	[M+CH3COO]-	C42H81NO3	VJSBNBBOSZJDKB-KPEYJIHVSA-N	CCCCCCCCCCCCC/C=C/[C@H]([C@H](CO)NC(=O)CCCCCCCCCCCCC/C=C\CCCCCCCC)O	5283568	81.32584:3071 99.59202:2916 102.75356:2960 161.74837:3083 203.09555:4349 237.22328:16493 263.23874:14328 300.30594:2842 347.33197:24288 347.63501:3341 364.35956:11641 365.34042:7094 390.3735:84397 406.36993:6325 429.08325:3529 598.604:5384 614.59039:4579 616.60315:12532 628.52301:58938 646.5246:47495 646.63275:116704 646.79987:3682 706.49927:5165	409347	8494	10225	586653	15759	292265	nd	97345	61326	12037	nd	160236	nd	nd	nd	nd	27921	15176	10552	44595	13234	nd	160114	1973747	17477	13191	16009	54909	56545	20928	9613	nd	nd
7.92_706.64	706.636	7.916	Cer 42:2;2O Isomer B	Lipids and lipid-like molecules	Sphingolipids	Ceramides	Long-chain ceramides	unsaturated_ceramides	1	CSH ESI-	[M+CH3COO]-	C42H81NO3	VJSBNBBOSZJDKB-KPEYJIHVSA-N	CCCCCCCCCCCCC/C=C/[C@H]([C@H](CO)NC(=O)CCCCCCCCCCCCC/C=C\CCCCCCCC)O	5283568	70.64207:2828 78.95766:3683 141.6328:3356 147.94334:3091 183.17601:3093 202.90549:5357 235.20618:14189 261.22394:6767 264.23306:4486 271.10889:3033 349.34683:13594 364.35751:3198 366.37524:5663 390.37433:17801 390.51981:3143 392.38919:50729 405.11401:2777 408.38498:6123 614.5849:5143 616.60907:12340 628.52484:65376 646.52502:50041 646.63379:104338 706.5011:14594	55364	8494	10225	117111	8448	47291	nd	49981	24514	12037	nd	nd	nd	nd	nd	nd	27921	10593	10552	13935	nd	nd	110607	519538	10937	13191	16009	17939	19784	9264	9613	6894	nd
8.66_722.67	722.668	8.659	Cer 43:1;2O	Lipids and lipid-like molecules	Sphingolipids	Ceramides	Long-chain ceramides	unsaturated_ceramides	1	CSH ESI-	[M+CH3COO]-	C43H85NO3	QHPYSHVSWAOLHS-PVNBSDFKSA-N	CCCCCCCCCCCCCCCCCCCCCCCCC(=O)N[C@@H](CO)[C@@H](/C=C/CCCCCCCCCCCCC)O	9547202	74.58569:3023 117.22243:3145 234.94562:3252 237.21971:6073 251.23788:24524 263.23639:4174 277.25305:20074 280.26282:6685 349.3475:26365 366.37317:15430 367.35721:14447 380.38965:4381 388.56519:3156 392.3898:85459 406.40622:25252 408.38226:16760 508.01682:3703 614.6261:12066 630.61755:7293 632.6344:17349 662.64551:247184	6905	nd	nd	30630	nd	9110	nd	nd	8846	nd	nd	10490	nd	nd	nd	nd	nd	nd	nd	nd	nd	nd	nd	52977	nd	nd	nd	nd	6551	nd	nd	nd	nd
5.72_538.52	538.519	5.721	Cer d34:1	Lipids and lipid-like molecules	Sphingolipids	Ceramides	Long-chain ceramides	unsaturated_ceramides	1	CSH ESI+	[M+H]+	C34H67NO3	YDNKGFDKKRUKPY-TURZORIXSA-N	CCCCCCCCCCCCCCCC(=O)N[C@@H](CO)[C@@H](/C=C/CCCCCCCCCCCCC)O	5283564	80.04464:2336 82.06528:3018 97.5716:2545 101.31507:2550 112.80775:2417 115.57433:2904 118.67939:2727 165.19635:3126 236.23781:10533 252.26945:11288 264.26883:140706 282.27847:18806 296.91257:2816 520.51135:12687	1476841	96113	244769	1609428	nd	842944	45282	852616	1407621	398331	75869	928786	72628	143045	254366	118321	388994	148711	52052	421687	875838	670325	1073947	4898309	1299042	166693	138321	208613	217965	2000645	11442	120653	141394
6.42_566.55	566.551	6.425	Cer d36:1	Lipids and lipid-like molecules	Sphingolipids	Ceramides	Long-chain ceramides	unsaturated_ceramides	1	CSH ESI+	[M+H]+	C36H71NO3	MJQIARGPQMNBGT-WWUCIAQXSA-N	CCCCCCCCCCCCCCC[C@H]([C@H](CO)NC(=O)CCCCCCC/C=C\CCCCCCCC)O	6442676	71.08576:10997 76.62004:5226 79.05437:10928 81.07005:30697 82.0652:70886 83.08544:8186 85.1011:9161 88.82249:5233 93.06979:21555 94.99526:4543 95.08564:34833 96.08117:4451 97.10109:8427 107.08563:8184 109.10167:11431 109.47259:4711 121.10136:11722 123.11738:5209 127.69619:4553 135.11662:9566 136.63997:7822 196.08734:4819 224.23781:5605 236.23773:129396 247.24277:5923 252.26859:214237 254.24709:10…	339761	5159	71654	237178	nd	227223	nd	557791	640417	319175	22279	168203	nd	26462	148803	81468	267657	159581	6448	214919	787522	660456	394355	368126	544055	75873	141996	159695	180826	1864998	nd	31399	28493
7.81_622.61	622.614	7.809	Cer d40:1	Lipids and lipid-like molecules	Sphingolipids	Ceramides	Long-chain ceramides	unsaturated_ceramides	1	CSH ESI+	[M+H]+	C40H79NO3	KEPQASGDXIEOIL-GLQCRSEXSA-N	CCCCCCCCCCCCCCCCCCCCCC(=O)N[C@@H](CO)[C@@H](/C=C/CCCCCCCCCCCCC)O	5283567	82.06516:12666 95.08562:3456 105.9014:2915 108.06255:2939 109.10143:3571 124.17863:2767 143.34065:3132 186.30025:2518 186.83728:2664 200.95326:5613 202.71147:5931 224.23616:3731 236.23729:45830 245.93051:2652 250.25374:33036 252.26892:32607 264.26883:329117 268.26279:3011 271.43024:3469 282.2789:37332 300.08508:3099 339.28662:3563 402.41089:2787 574.58881:5774 586.59131:10521 604.60315:42663	294517	9949	21515	520381	nd	255579	9987	172995	136846	21833	nd	274856	5131	41841	13236	22080	29195	45313	9851	97302	74026	83279	327532	1057230	81160	36602	6418	28660	12384	143604	12608	39473	10326
8.45_650.64	650.645	8.449	Cer d42:1	Lipids and lipid-like molecules	Sphingolipids	Ceramides	Long-chain ceramides	unsaturated_ceramides	1	CSH ESI+	[M+H]+	C42H83NO3	ZJVVOYPTFQEGPH-AUTSUKAISA-N	CCCCCCCCCCCCCCCCCCCCCCCC(=O)N[C@@H](CO)[C@@H](/C=C/CCCCCCCCCCCCC)O	5283571	71.99552:2541 81.07001:4829 82.0653:10859 93.06989:3397 93.44457:2769 107.08601:2949 252.26849:36884 257.26443:2948 258.47037:2925 264.2688:379131 264.72015:2704 282.27942:59716 287.61804:3916 292.29962:22012 368.38995:4921 467.8584:3004 533.45551:3073 614.62042:6766 632.63507:44584 650.63409:11340	215061	9353	5164	389858	nd	201201	6806	119954	82406	20570	nd	193270	6333	47019	5530	17624	17357	14635	9041	63590	59744	69921	212819	692154	48125	17493	13720	69443	18341	92773	nd	29348	10430
CDCA			Chenodeoxycholic acid	Lipids and lipid-like molecules	Steroids and steroid derivatives	Bile acids, alcohols and derivatives	Hydroxy bile acids, alcohols and derivatives	unconjugated bile acids	1	LC-MS/MS_BA		C24H40O4	RUDATBOHQWOJDD-BSWAIDMHSA-N	C[C@H](CCC(=O)O)[C@H]1CC[C@@H]2[C@@]1(CC[C@H]3[C@H]2[C@@H](C[C@H]4[C@@]3(CC[C@H](C4)O)C)O)C	10133	391.3/ 391.3	177137	81811	9228	5870	182	54079	20065	71704	167887	735	41514	21746	16428	1912	25915	29593	193781	114288	19909	226725	218829	155511	229743	22462	180359	65653	65335	390313	133394	592481	nd	18774	23381
295	255	1051615	chlorogenic acid	Organic oxygen compounds	Organooxygen compounds	Alcohols and polyols	Cyclic alcohols and derivatives	phenolic natural products	1	GCMS		C16H18O9	CWVRJTMFETXNAD-JUHZACGLSA-N	C1[C@H]([C@H]([C@@H](C[C@@]1(C(=O)O)O)OC(=O)/C=C/C2=CC(=C(C=C2)O)O)O)O	1794427	85:101.0 87:140.0 88:225.0 89:20.0 91:76.0 92:130.0 94:23.0 95:157.0 96:52.0 97:92.0 100:13.0 101:152.0 102:54.0 103:841.0 105:315.0 106:50.0 112:104.0 113:122.0 115:427.0 117:508.0 119:207.0 121:146.0 123:87.0 125:106.0 126:68.0 127:183.0 128:120.0 129:428.0 130:104.0 131:198.0 132:10.0 133:1329.0 134:261.0 135:313.0 136:73.0 137:126.0 138:69.0 139:127.0 141:213.0 142:120.0 143:352.0 144:91.0 14…	1635	1047	1517	3718	2969	1137	2569	1029	1198	1442	751	619	1438	2074	1130	3106	1194	1351	1259	860	1392	1088	532	1682	1306	1708	1137	1404	737	527	432	452	1027
CA			Cholic acid	Lipids and lipid-like molecules	Steroids and steroid derivatives	Bile acids, alcohols and derivatives	Hydroxy bile acids, alcohols and derivatives	unconjugated bile acids	1	LC-MS/MS_BA		C24H40O5	BHQCQFFYRZLCQQ-OELDTZBJSA-N	C[C@H](CCC(=O)O)[C@H]1CC[C@@H]2[C@@]1([C@H](C[C@H]3[C@H]2[C@@H](C[C@H]4[C@@]3(CC[C@H](C4)O)C)O)O)C	221493	407.3 / 407.3	560122	554623	12112	24625	2038	138639	53606	414532	849584	11844	125482	251843	140859	4154	43145	326579	609819	606772	354151	717939	749792	654463	626751	136517	630685	368400	280950	1067534	582382	1512446	640	238164	489880
5.17_104.11	104.107	5.166	Choline	Organic nitrogen compounds	Organonitrogen compounds	Quaternary ammonium salts	Cholines	ethanolamines	1	HILIC ESI+	[M]+	C5H14NO	OEYIOHPDSNJKLS-UHFFFAOYSA-N	C[N+](C)(C)CCO	305	53.35643:749550 57.93996:919318 58.06545:10055522 59.07303:4573666 60.08107:120693088 60.54706:1010941 77.10146:828292 103.16972:798152 104.10709:271753344	556565947	944853780	1365662771	967204303	3012775	899595900	93978017	1592264200	2735834571	9158856	415690667	655351665	125173955	1298656189	1907687599	1413686260	393703948	573121000	1901826565	1311730537	167967775	33013536	1999302903	25480361	1456633218	1677508109	25429424	141312469	361165451	316242435	506292951	1310665151	321910590
288	273	617342	citric acid	Organic acids and derivatives	Carboxylic acids and derivatives	Tricarboxylic acids and derivatives	Tricarboxylic acids and derivatives	carboxylic acids	1	GCMS		C6H8O7	KRKNYBCHXYNGOX-UHFFFAOYSA-N	C(C(=O)O)C(CC(=O)O)(C(=O)O)O	311	85:108.0 87:167.0 88:92.0 89:136.0 92:58.0 93:86.0 95:193.0 96:108.0 97:78.0 99:605.0 100:143.0 101:223.0 102:92.0 103:336.0 104:70.0 105:58.0 109:24.0 110:55.0 111:256.0 112:15.0 114:87.0 115:639.0 116:312.0 117:522.0 118:105.0 119:62.0 120:32.0 124:17.0 125:53.0 126:49.0 127:177.0 128:22.0 129:915.0 131:952.0 132:92.0 133:1929.0 134:60.0 135:258.0 136:35.0 137:44.0 139:90.0 140:83.0 141:331.0 1…	6854	591	6713	5899	553	28987	984	192	174	3019	31974	1214	1599	5015	3000	3548	1503	2107	5993	2565	1054	1359	1467	2164	1895	1136	7711	2088	2840	827	47812	671	1956
8.85_174.09	174.087	8.852	Citrulline	Organic acids and derivatives	Carboxylic acids and derivatives	Amino acids, peptides, and analogues	Amino acids and derivatives	amino acids	1	HILIC ESI-	[M-H]-	C6H13N3O3	RHGKLRLOHDJJDR-BYPYZUCNSA-N	C(C[C@@H](C(=O)O)N)CNC(=O)N	6992098	56.49208:2369 56.93032:1880 72.31827:1854 74.02339:39848 87.05505:22447 88.03907:79498 99.9247:3901 101.0708:8469 115.91951:3868 116.92746:8362 131.0452:91946 131.08141:371230 145.06078:131353 146.96008:4277 174.08827:3028	968745	14896222	202214	422941	12592	531126	1868135	6437914	10525463	164140	2195120	9313312	650157	294341	552632	5843075	4415718	2863399	10686767	11088620	2587427	8252014	2103621	2131682	9147872	4879769	3335101	1299377	9398879	7099254	76220	7502016	12398304
4.89_250.10	250.098	4.887	Cordycepin	Nucleosides, nucleotides, and analogues	Purine nucleosides	Purine 3'-deoxyribonucleosides	Purine 3'-deoxyribonucleosides	nucleoside metabolite	1	HILIC ESI-	[M-H]-	C10H13N5O3	OFEZSBMBBKLLBJ-BAJZRUMYSA-N	C1[C@H](O[C@H]([C@@H]1O)N2C=NC3=C2N=CN=C3N)CO	6303	59.0125:61414 60.01241:160510 71.01226:94469 84.01286:66681 85.02805:170357 86.04955:38830 89.02316:90110 92.89219:41281 98.02813:73359 101.02319:439917 121.04943:93592 128.02791:70387 128.03885:2893479 130.0545:1631570 146.0495:9726033 147.04588:77197 203.70166:73022 232.08688:1023096 238.02904:48032 250.09769:32258544	nd	1861	nd	nd	417	nd	1717	3111	786	nd	nd	nd	3097	nd	nd	nd	753	nd	754	880	732	568	nd	784	5739	722	4292	nd	nd	649	963	990	2968
8.08_132.08	132.077	8.081	Creatine	Organic acids and derivatives	Carboxylic acids and derivatives	Amino acids, peptides, and analogues	Amino acids and derivatives	amino acids	1	HILIC ESI+	[M+H]+	C4H9N3O2	CVSVTCORWBXHQV-UHFFFAOYSA-N	CN(CC(=O)O)C(=N)N	586	52.24704:1809 59.1253:1760 65.67119:1751 82.0326:1680 108.11926:1654	142024328	85435593	39564119	57717889	176422	283297237	5835705	156086160	113430123	296537	90691248	61832767	110800116	57150440	72693092	43641153	84775824	139663754	135012791	118127329	101412587	35323343	71422297	61996353	52205256	119130814	49789791	114710938	234372126	89762022	105934967	200968312	137555024
4.86_114.07	114.066	4.859	Creatinine	Organic acids and derivatives	Carboxylic acids and derivatives	Amino acids, peptides, and analogues	Amino acids and derivatives	imidazoles	1	HILIC ESI+	[M+H]+	C4H7N3O	DDRJAANPRJIHGJ-UHFFFAOYSA-N	CN1CC(=O)N=C1N	588	52.73267:510246 53.87675:429745 65.76913:382365 70.68024:450686 86.07149:3462862 87.58224:419788 102.50915:416996 114.0663:22035152	294839766	224126214	145761727	96758078	6269378	800995398	18536925	178105143	127465585	9961442	160615551	178441726	233508082	116417874	688916810	216948204	183939159	302917401	205951123	172832725	200023528	196335205	269794286	194545379	80959844	397585229	102699021	284621374	398974697	231822711	217363915	346645750	306858376
9.89_223.07	223.075	9.889	Cystathionine	Organic acids and derivatives	Carboxylic acids and derivatives	Amino acids, peptides, and analogues	Amino acids and derivatives	amino acids, sulfur	1	HILIC ESI+	[M+H]+	C7H14N2O4S	ILRYLPWNYFXEMH-WHFBIAKZSA-N	C(CSC[C@@H](C(=O)O)N)[C@@H](C(=O)O)N	25243997	50.98917:1713 56.04981:34170 88.02164:166924 88.03921:2288 92.62753:2519 114.87747:2302 134.02705:529857 157.59546:1943 185.0537:1859 195.95732:1987 223.07498:80859	nd	9088	nd	nd	nd	nd	nd	3188	4991	nd	32172	2547	nd	nd	nd	nd	2082	nd	20312	5479	nd	nd	8195	7284	nd	nd	nd	nd	5996	13740	nd	9900	nd
9.04_168.00	167.996	9.043	Cysteic Acid	Organic acids and derivatives	Carboxylic acids and derivatives	Amino acids, peptides, and analogues	Amino acids and derivatives	amino acids, sulfur	1	HILIC ESI-	[M-H]-	C3H7NO5S	XVOYSCVBGLVSOL-REOHCLBHSA-N	C([C@@H](C(=O)O)N)S(=O)(=O)O	72886	54.81496:1822 64.1828:1780 65.14526:1942 66.73221:1913 66.8297:1692 71.01245:22983 80.96391:52164 86.02352:10984 100.03923:2012 150.96974:38211 167.99629:86078 168.02786:18391	88250	23765	460	513	5655	46493	6466	1955	1176	2194	27050	12513	21482	1066	1447	523	565	1661	2503	9895	12564	4757	18392	2506	13388	16327	28757	78009	15689	27434	3184	9680	3496
65	220	500158	cysteine	Organic acids and derivatives	Carboxylic acids and derivatives	Amino acids, peptides, and analogues	Amino acids and derivatives	amino acids, sulfur	1	GCMS		C3H7NO2S	XUJNEKJLAYXESH-REOHCLBHSA-N	C([C@@H](C(=O)O)N)S	5862	86:175.0 90:83.0 91:341.0 97:81.0 98:68.0 100:3118.0 101:289.0 102:126.0 103:157.0 104:40.0 106:71.0 111:61.0 112:46.0 113:48.0 115:193.0 116:681.0 117:121.0 119:107.0 120:61.0 130:238.0 132:808.0 133:307.0 135:39.0 146:182.0 147:1274.0 149:187.0 163:84.0 172:22.0 204:108.0 217:15.0 218:2544.0 219:362.0 220:2803.0 221:383.0 222:297.0 223:28.0 231:29.0 232:38.0 262:21.0 287:23.0 301:27.0 304:25.0 …	663	8444	3544	1700	2068	8083	1048	1766	1372	979	627	521	1278	1947	2450	1417	1304	1990	1429	1795	1479	989	598	1766	2739	1805	1570	570	2396	1288	168	479	993
9.95_239.02	239.016	9.945	Cystine	Organic acids and derivatives	Carboxylic acids and derivatives	Amino acids, peptides, and analogues	Amino acids and derivatives	amino acids, sulfur	1	HILIC ESI-	[M-H]-	C6H12N2O4S2	LEVWYRKDKASIDU-IMJSIDKUSA-N	C([C@@H](C(=O)[O-])[NH3+])SSC[C@@H](C(=O)[O-])[NH3+]	67678	50.94347:2081 64.68507:2231 64.95223:2000 74.00565:40194 80.62144:1994 86.0235:4712 95.67632:1911 120.01126:102049 120.02103:3411 151.98375:10866 160.41226:2324 191.29526:2151 239.01614:4146	302197	175602	545322	301973	256	252252	24749	6212	25454	2932	187462	31727	16280	644400	902915	34882	2911	8101	50836	17238	11472	6602	1347343	66798	41855	198351	7819	220903	43209	63577	131717	162376	15515
5.84_112.05	112.05	5.845	Cytosine	Organoheterocyclic compounds	Diazines	Pyrimidines and pyrimidine derivatives	Pyrimidones	nucleoside metabolite	1	HILIC ESI+	[M+H]+	C4H5N3O	OPTASPLRGRRNAP-UHFFFAOYSA-N	C1=C(NC(=O)N=C1)N	597	55.03347:2301 61.26017:1861 69.0447:25418 70.06523:9173 94.0398:8322 95.02394:62643 112.0505:277589	218504	961511	281077	204933	1646447	429847	483936	1092849	2362182	2990629	570683	889776	667103	345746	795801	231325	431429	236338	1125998	1495531	2628459	3652615	648508	2755606	1973357	886344	1566458	234059	655837	861464	1687736	2103503	1394718
1.34_253.05	253.05	1.341	Daidzein	Phenylpropanoids and polyketides	Isoflavonoids	Isoflav-2-enes	Isoflavones	phenolic natural products	1	HILIC ESI-	[M-H]-	C15H10O4	ZQSIJRDFPHDXIC-UHFFFAOYSA-N	C1=CC(=CC=C1C2=COC3=C(C2=O)C=CC(=C3)O)O	5281708	54.49499:2119 58.07487:1939 64.37085:2137 81.80806:2374 86.04682:2109 130.08452:2035 151.07571:3012 198.12167:14518 209.05998:4186 209.15355:13411 224.0482:2212 225.05319:2452 230.80475:2350 231.28719:2393 253.05037:1194875	45435	33295	128018	5691	2256	35906	3011	5292	3808	8205	38118	50234	2773	6567	3894	2625	6204	8915	33660	75387	127629	61193	39158	17086	28855	51268	7337	nd	2768	1409	nd	1630	1088
8917	239	850374	dehydroabietic acid	Lipids and lipid-like molecules	Prenol lipids	Diterpenoids	Diterpenoids	phenolic natural products	1	GCMS		C20H28O2	NFWKVWVWBFBAOV-MISYRCLQSA-N	CC(C)C1=CC2=C(C=C1)[C@]3(CCC[C@@]([C@@H]3CC2)(C)C(=O)O)C	94391	86:3.0 91:5.0 95:52.0 100:123.0 103:154.0 113:7.0 115:48.0 116:270.0 117:458.0 118:31.0 128:458.0 129:250.0 130:43.0 131:210.0 138:6.0 141:353.0 142:165.0 143:325.0 144:453.0 152:58.0 153:66.0 154:107.0 155:66.0 157:196.0 158:79.0 159:89.0 165:156.0 166:55.0 167:86.0 169:91.0 170:38.0 171:308.0 173:234.0 177:29.0 178:30.0 179:24.0 181:24.0 183:94.0 184:22.0 186:29.0 187:73.0 191:34.0 195:36.0 197…	1256	1723	3374	3575	24742	7064	23385	340	4227	3729	1233	726	2646	1771	5187	1737	3748	4065	976	1106	3417	1523	1299	25687	21583	11999	3225	16670	4868	942	265	642	1865
9.81_161.09	161.092	9.809	delta-Hydroxylysine	Organic acids and derivatives	Carboxylic acids and derivatives	Amino acids, peptides, and analogues	Amino acids and derivatives	amino acids, basic	1	HILIC ESI-	[M-H]-	C6H14N2O3	YSMODUONRAFBET-UHNVWZDZSA-N	C(C[C@@H](C(=O)O)N)[C@H](CN)O	3032849	59.01247:8628 59.62141:2035 60.83359:2148 61.0088:4835 63.00449:13317 66.33124:1867 71.01238:4814 71.0489:4842 72.00788:2953 72.0442:4368 72.99174:8057 73.02805:19622 77.80156:2111 80.27782:1962 80.7062:2366 85.02809:3510 87.00743:18201 95.05997:2893 97.03954:2797 99.0074:9903 99.04361:4104 102.05476:2371 112.03928:2831 113.07077:10465 115.08643:23837 116.92725:26618 125.0709:18431 126.05468:2208…	nd	590	nd	1037	437	4492	6794	104101	84252	20837	nd	1606	3394	nd	10173	47989	57748	247584	8908	14647	6320	10602	7966	1727	11221	26005	8159	142164	38840	11816	1582	10323	4126
DCA			Deoxycholic acid	Lipids and lipid-like molecules	Steroids and steroid derivatives	Bile acids, alcohols and derivatives	Hydroxy bile acids, alcohols and derivatives	unconjugated bile acids	1	LC-MS/MS_BA		C24H40O4	KXGVEGMKQFWNSR-LLQZFEROSA-N	C[C@H](CCC(=O)O)[C@H]1CC[C@@H]2[C@@]1([C@H](C[C@H]3[C@H]2CC[C@H]4[C@@]3(CC[C@H](C4)O)C)O)C	222528	391.3 / 391.3	210371	44652	6816	5250	628	50297	8510	40083	67238	174780	27187	12625	14837	1124	18296	33926	204245	127021	11139	102711	112194	75795	100376	7616	86644	31721	64051	163338	94272	263119	6	10320	17142
33037	231	528774	deoxypentitol	Organic oxygen compounds	Organooxygen compounds	Alcohols and polyols	Secondary alcohols	sugar alcohols	1	GCMS		C5H12O4	FJGNTEKSQVNVTJ-UHFFFAOYSA-N	CC(C(C(CO)O)O)O	270738	87:25.0 89:344.0 90:21.0 101:747.0 102:136.0 103:1141.0 104:17.0 105:123.0 111:54.0 113:68.0 114:9.0 115:1403.0 117:1187.0 118:109.0 119:126.0 128:82.0 129:1844.0 130:246.0 131:413.0 132:69.0 133:945.0 134:35.0 135:18.0 140:208.0 141:182.0 142:167.0 144:282.0 145:197.0 147:3278.0 148:300.0 149:544.0 151:15.0 155:310.0 156:93.0 157:179.0 158:52.0 159:66.0 163:39.0 164:96.0 165:2.0 171:3.0 172:76.0…	4001	3023	2523	1805	10231	3685	5405	2598	2206	4796	1316	1452	3490	2444	3335	8217	4625	4159	3212	4470	3372	3542	1935	5488	6065	3365	9014	2412	2179	3191	375	1669	4149
7.72_640.59	640.587	7.723	DG 36:1	Lipids and lipid-like molecules	Glycerolipids	Diradylglycerols	Diacylglycerols	unsaturated_diglycerides	1	CSH ESI+	[M+NH4]+	C39H74O5	SAEPUUXWQQNLGN-LVVMQYBKSA-N	CCCCCCCCCCCCCCCCCC(=O)OC[C@H](CO)OC(=O)CCCCCCC/C=C\CCCCCCCC	6443547	71.08572:11538 74.98492:2514 77.24269:2955 81.06991:12632 82.06547:3318 83.08549:12325 85.1013:5309 95.08551:17419 97.10126:3858 109.10135:5124 121.10156:3328 161.77505:2599 174.60486:2762 202.70081:8844 259.31396:3717 260.31549:5962 261.32071:4691 271.31265:44685 272.3161:105412 273.3194:71727 274.32181:13411 276.4422:2941 289.32465:4481 290.32568:19541 291.32928:3105 339.29031:59952 341.26199:5…	nd	nd	nd	nd	nd	8614	4524	2357	nd	nd	nd	nd	nd	34767	nd	nd	nd	8357	nd	nd	4307	nd	nd	540805	4328	nd	nd	nd	nd	6609	573851	nd	nd
7.11_638.57	638.572	7.108	DG 36:2	Lipids and lipid-like molecules	Glycerolipids	Diradylglycerols	Diacylglycerols	unsaturated_diglycerides	1	CSH ESI+	[M+NH4]+	C39H72O5	AFSHUZFNMVJNKX-LLWMBOQKSA-N	CCCCCCCC/C=C\CCCCCCCC(=O)OC[C@H](CO)OC(=O)CCCCCCC/C=C\CCCCCCCC	9543716	71.08569:124886 79.05418:94812 81.07001:462335 83.08054:26935 83.08569:563789 85.06522:17879 85.10125:62679 93.06992:181850 95.08568:643953 97.06485:68132 97.10133:393394 99.08035:17531 107.0856:169690 109.10136:296420 111.08052:72618 111.11713:173668 111.82073:13214 113.09647:18497 121.10129:358397 123.11681:128797 125.09643:25940 125.13269:22605 127.11049:16537 135.11697:293060 137.13268:53785 …	31396	48778	29226	45057	46271	51681	41429	40570	14240	16444	24143	76210	33656	256309	54765	27706	8376	46480	48680	49161	61406	50325	36505	17175668	21984	43472	32768	8955	27569	71661	15742490	56127	41581
6.57_636.56	636.556	6.565	DG 36:3	Lipids and lipid-like molecules	Fatty Acyls	Lineolic acids and derivatives	Lineolic acids and derivatives	unsaturated_diglycerides	1	CSH ESI+	[M+NH4]+	C39H70O5	BLZVZPYMHLXLHG-JOBMVARSSA-N	CCCCCCCC/C=C\CCCCCCCC(=O)OC[C@H](CO)OC(=O)CCCCCCC/C=C\C/C=C\CCCCC	9543722	71.08569:778204 73.05418:486508 77.31:413998 79.05434:2327564 81.07003:14486389 83.08568:7316448 85.06528:470817 85.10131:616058 91.05431:1863974 91.54107:404185 93.06985:4614811 94.02934:396015 95.08564:14305670 97.06503:936672 97.10125:6034241 105.07002:574037 107.08589:3577762 109.10129:7532482 111.08083:915658 111.11694:2341198 119.08583:1041179 121.10116:6210048 123.11699:5012029 133.10164:2…	10168	7856	4557	15806	nd	5716	22304	22273	nd	8382	nd	11479	7932	108343	9621	11987	9772	14089	34734	19781	14023	9272	3749	19942611	12685	17935	20294	7516	12986	24191	11716694	28637	10673
6.02_634.54	634.54	6.024	DG 36:4	Lipids and lipid-like molecules	Fatty Acyls	Lineolic acids and derivatives	Lineolic acids and derivatives	unsaturated_diglycerides	1	CSH ESI+	[M+NH4]+	C39H68O5	MQGBAQLIFKSMEM-ZHARMHCNSA-N	CCCCC/C=C\C/C=C\CCCCCCCC(=O)OC[C@H](CO)OC(=O)CCCCCCC/C=C\C/C=C\CCCCC	9543729	70.74974:86318 71.08553:392354 79.05447:1384024 81.07007:6137446 83.08568:2339262 83.41177:81408 85.06466:162933 85.10123:125487 87.43759:108025 91.0544:834221 93.07008:1847581 95.04916:153270 95.0857:5870872 97.06495:426154 97.1014:1299982 99.08039:364681 105.07019:762316 107.08558:1668602 109.10134:2712371 111.08045:378696 111.11687:345154 113.09595:119370 119.08545:998382 121.1012:1740532 123.…	nd	nd	nd	nd	nd	nd	nd	nd	nd	nd	nd	nd	nd	nd	nd	nd	nd	nd	nd	nd	nd	nd	nd	6412290	nd	nd	nd	nd	nd	nd	5035550	nd	nd
6.40_660.56	660.556	6.4	DG 38:5	Lipids and lipid-like molecules	Glycerolipids	Diradylglycerols	Diacylglycerols	unsaturated_diglycerides	1	CSH ESI+	[M+NH4]+	C41H70O5	GRGDLDNREYVILP-CNWVQWJYSA-N	CCCCC/C=C\C/C=C\CCCCCCCCCC(=O)O[C@@H](CO)COC(=O)CCCCCCC/C=C\C/C=C\C/C=C\CC	9543784	79.05445:2741 81.06985:11936 83.08542:11665 88.11194:6363 91.05413:4823 95.08561:11050 97.10088:2955 100.16936:2771 109.10149:3184 116.41164:2632 119.08575:5197 121.1013:5904 130.83699:2796 133.10118:4331 135.11636:4888 149.13197:3469 160.11005:3357 161.21474:3036 202.6373:3422 203.17899:10735 208.01237:2894 269.22559:5263 287.23602:4925 329.06116:3103 339.28934:69442 361.27417:13618	nd	nd	nd	nd	nd	nd	nd	nd	nd	nd	nd	nd	nd	nd	nd	nd	nd	nd	nd	nd	nd	nd	nd	178384	nd	nd	nd	nd	nd	nd	5572	nd	nd
102845	169	980132	digalacturonic acid	Organic oxygen compounds	Organooxygen compounds	Carbohydrates and carbohydrate conjugates	Sugar acids and derivatives	sugars	1	GCMS		C12H18O13	IGSYEZFZPOZFNC-LKIWRGPLSA-N	[C@@H]1([C@H]([C@H](O[C@@H]([C@@H]1O)O[C@@H]2[C@@H]([C@H](C(O[C@@H]2C(=O)O)O)O)O)C(=O)O)O)O	439694	85:2056.0 86:960.0 87:1666.0 88:817.0 89:10554.0 90:849.0 91:761.0 92:358.0 93:733.0 94:318.0 95:1065.0 96:1003.0 97:620.0 98:439.0 99:2181.0 100:2220.0 101:4245.0 102:3597.0 103:10746.0 104:1313.0 105:4236.0 106:368.0 107:335.0 108:96.0 109:225.0 110:226.0 111:990.0 112:366.0 113:1400.0 114:1494.0 115:3537.0 116:2670.0 117:6646.0 118:818.0 119:1770.0 120:244.0 121:416.0 122:219.0 123:428.0 124:1…	4524	3751	3142	6628	2137	25619	11937	6478	541	4106	7565	2101	3862	8492	890	15067	2304	27740	1240	17233	41086	16138	4320	13602	9979	4948	25571	1921	1544	12791	1110	3197	14680
0.98_331.26	331.264	0.983	Docosatetraenoic acid	Lipids and lipid-like molecules	Fatty Acyls	Fatty acids and conjugates	Very long-chain fatty acids	unsaturated_FA	1	HILIC ESI-	[M-H]-	C22H36O2	TWSWSIQAPQLDBP-DOFZRALJSA-N	CCCCC/C=C\C/C=C\C/C=C\C/C=C\CCCCCC(=O)O	5497181	59.0124:14784 62.63294:2491 77.61674:2334 128.58109:2662 154.26042:2747 154.39337:2329 198.84431:3719 198.86372:9858 204.03748:2340 217.77931:2487 233.2267:3678 234.49785:2204 258.61722:2260 287.27444:16973 331.26419:435949	653194	1065021	513854	1080537	57117	1170933	163789	822091	401965	174206	429743	581271	432521	830257	1068642	366732	598971	877446	442475	696069	1507960	964564	943908	561576	1471287	1241043	706686	39801	1049682	1112947	nd	423133	354050
12092	243	507619	dodecanol	Lipids and lipid-like molecules	Fatty Acyls	Fatty alcohols	Fatty alcohols	fatty alcohols	1	GCMS		C12H26O	LQZZUXJYWNFBMV-UHFFFAOYSA-N	CCCCCCCCCCCCO	8193	85:402.0 86:5.0 87:55.0 88:22.0 89:1221.0 90:28.0 91:164.0 97:1064.0 98:48.0 99:290.0 101:655.0 102:50.0 103:1071.0 104:12.0 105:2.0 107:23.0 110:75.0 111:463.0 113:15.0 115:147.0 116:5.0 117:2.0 119:2.0 124:1.0 125:24.0 127:111.0 129:13.0 130:11.0 132:11.0 133:6.0 143:5.0 147:15.0 166:1.0 171:74.0 175:5.0 185:1.0 188:2.0 189:11.0 190:4.0 191:1.0 220:259.0 221:14.0 223:3.0 243:1615.0 244:323.0 24…	4230	6320	16652	106546	86632	9632	67315	9842	21931	5631	8095	1493	5662	5159	19716	5602	14182	16279	2297	2224	7860	3276	4167	98299	36755	38095	11788	80738	16382	2631	539	1024	6875
3.50_218.10	218.103	3.504	D-Pantothenic acid	Organic oxygen compounds	Organooxygen compounds	Alcohols and polyols	Secondary alcohols	pantothenic acid	1	HILIC ESI-	[M-H]-	C9H17NO5	GHOKWGTUZJEAQD-ZETCQYMHSA-N	CC(C)(CO)[C@H](C(=O)NCCC(=O)O)O	6613	52.79878:4463 55.07431:4925 59.01248:23835 60.58548:5675 62.92789:4142 68.51776:5286 71.01251:268900 71.04884:148675 72.04369:4930 88.03909:2836282 99.04389:44162 116.03438:10821 116.07071:26229 121.27022:5292 129.05466:5696 142.21219:4824 146.08116:1442157 201.87474:6642 218.10295:1034574	656541	5177047	230291	306855	1164101	1452406	989593	5730157	5219593	2416466	436959	3476381	2919492	1047622	1019439	4127712	3030949	3880309	3843047	5815090	4974047	4122215	2938487	4153797	9407610	4588616	9595636	373967	2684897	2868813	579059	3848664	3894729
0.99_305.25	305.248	0.987	Eicosatrienoic acid	Lipids and lipid-like molecules	Fatty Acyls	Fatty acids and conjugates	Long-chain fatty acids	unsaturated_FA	1	HILIC ESI-	[M-H]-	C20H34O2	MZHLWKPZCXLYSL-IJJPYCETSA-N	CCCCC/C=C\CCCC/C=C\C/C=C\CCCC(=O)O	9548811	59.01249:34434 61.49454:2281 63.66477:1999 71.01235:2162 74.57366:2663 77.57832:2148 83.04886:3715 108.2003:2181 109.91818:2677 151.51808:2632 164.95576:2219 216.42754:2396 233.22789:3563 261.2587:17173 287.23743:16586 290.39395:2257 303.23383:3707 305.24838:1846682	577287	1038103	530880	1148119	59070	1009791	156467	912323	388855	173701	395760	576173	428579	878893	1114614	325533	522885	923806	428503	698213	1584951	1047078	779854	463891	1667212	1245254	636648	86488	1046419	1160456	nd	420910	355250
2.79_289.07	289.072	2.794	Epicatechin	Phenylpropanoids and polyketides	Flavonoids	Flavans	Flavan-3-ols	phenolic natural products	1	HILIC ESI-	[M-H]-	C15H14O6	PFTAWBLQPZVEMU-UKRRQHHQSA-N	C1[C@H]([C@H](OC2=CC(=CC(=C21)O)O)C3=CC(=C(C=C3)O)O)O	72276	55.80643:7809 57.0333:30196 63.33622:6158 81.03307:76072 83.01256:37520 95.04893:76431 97.02831:182445 109.02828:726889 121.0284:89475 122.03636:9148 123.03369:9611 123.04398:287568 125.02327:693162 133.35376:7659 135.04391:54201 137.02328:356740 137.45528:7246 138.03149:10376 139.03874:124577 145.02872:10992 146.03662:15981 147.69394:8291 149.02338:154427 150.03114:15027 151.03918:360582 159.044…	46431	274480	4362	95824	53129	533829	22382	21777	21280	844	296300	217941	51310	97685	4033	7825	27861	236867	88009	20021	14218	15515	18013	1015	11350	35713	17208	nd	1897	2336	22028	29812	3765
92	217	471922	erythritol	Organic oxygen compounds	Organooxygen compounds	Carbohydrates and carbohydrate conjugates	Sugar alcohols	sugar alcohols	1	GCMS		C4H10O4	UNXHWFMMPAWVPI-ZXZARUISSA-N	C([C@H]([C@H](CO)O)O)O	222285	86:57.0 87:443.0 89:682.0 90:92.0 99:480.0 100:41.0 101:1823.0 103:7046.0 104:676.0 105:300.0 106:59.0 109:27.0 111:45.0 113:474.0 115:473.0 116:1861.0 117:6123.0 118:476.0 119:295.0 127:453.0 129:1559.0 130:129.0 131:448.0 133:1902.0 134:216.0 144:53.0 147:9776.0 148:785.0 149:656.0 158:25.0 159:8.0 163:98.0 169:60.0 174:40.0 175:153.0 176:58.0 177:60.0 183:21.0 189:1255.0 190:194.0 191:893.0 19…	21450	8560	3327	9239	2518	14368	5047	3629	6737	940	3254	10290	1539	7027	13838	12476	9065	1412	7990	7624	5126	12133	2643	2673	7076	7972	2481	7734	7573	5581	1571	4038	8807
102661	205	443306	erythrose	Organic oxygen compounds	Organooxygen compounds	Carbohydrates and carbohydrate conjugates	Monosaccharides	sugars	1	GCMS		C4H8O4	FMAORJIQYMIRHF-HERZVMAMSA-N	C1[C@H]([C@H](C(O1)O)O)O	439574	85:252.0 86:309.0 87:286.0 88:262.0 89:3396.0 90:347.0 98:95.0 99:207.0 100:1047.0 101:1152.0 102:512.0 103:2966.0 104:321.0 105:570.0 111:37.0 112:126.0 113:92.0 114:259.0 115:522.0 116:243.0 117:8801.0 118:811.0 119:677.0 120:43.0 121:19.0 125:24.0 126:85.0 127:101.0 128:90.0 129:712.0 130:1223.0 131:821.0 132:198.0 133:2835.0 134:401.0 135:233.0 140:40.0 141:30.0 142:111.0 143:111.0 144:41.0 1…	1301	5035	955	688	1993	624	5811	1122	1275	1453	412	2516	1487	1986	877	1423	1209	1784	2889	3423	1881	2013	223	1241	2103	2133	2034	2166	2564	1221	139	1586	1520
1.70_253.22	253.217	1.7	FA 16:1 (palmitoleic acid)	Lipids and lipid-like molecules	Fatty Acyls	Fatty acids and conjugates	Long-chain fatty acids	unsaturated_FA	1	CSH ESI-	[M-H]-	C16H30O2	SECPZKHBENQXJG-FPLPWBNLSA-N	CCCCCC/C=C\CCCCCCCC(=O)O	445638	78.49795:16213 93.31819:15994 112.02649:20709 129.23311:16774 160.43877:20752 175.53915:17762 184.52863:17927 198.5425:90704 198.91528:17763 215.41272:15778 253.21729:11208782	5336088	2232305	3238082	2751661	452206	4473962	1133569	2563114	5747587	1211836	4783621	1266555	1153917	1640538	4014861	1829830	2916802	2797015	1460236	4947289	3897816	4368770	2905761	18313476	3587462	1439677	1010770	5099903	4248119	7996981	1497315	1580539	1380640
1.35_193.05	193.05	1.354	Ferulic acid	Phenylpropanoids and polyketides	Cinnamic acids and derivatives	Hydroxycinnamic acids and derivatives	Hydroxycinnamic acids	phenolic natural products	1	HILIC ESI-	[M-H]-	C10H10O4	KSEBMYQBYZTDHS-HWKANZROSA-N	COC1=C(C=CC(=C1)/C=C/C(=O)O)O	445858	57.03319:9880 74.94994:2171 79.95607:27674 80.96381:16090 84.34807:2617 106.04118:4461 113.02311:19705 133.02849:26149 134.03612:1836222 149.05965:2553764 150.06339:14436 176.06664:2505 178.02652:26287 192.98083:55003 193.01427:10803 193.04984:216762 193.06972:6958 193.08328:7371	1104512	570053	43303	55837	19033	2310422	34800	43591	44713	36775	249495	268658	131350	70117	78018	54828	150152	526428	53561	146600	206388	89411	1955649	38381	146404	846393	390579	42456	324640	100115	60279	110700	71811
FA			Formic Acid	Organic acids and derivatives	Carboxylic acids and derivatives	Carboxylic acids	Carboxylic acids	SCFAs	1	SCFA_GC		CH2O2	BDAGIHXWWSANSR-UHFFFAOYSA-N	C(=O)O	18971002		82	223	161	181	118	186	180	55	133	241	160	331	729	203	164	25	19	77	41	128	172	180	47	164	189	265	212	241	407	166	216	314	150
21	307	639442	fructose	Organic oxygen compounds	Organooxygen compounds	Carbohydrates and carbohydrate conjugates	Glycosyl compounds	sugars	1	GCMS		C6H12O6	RFSUNEUAIZKAJO-ARQDHWQXSA-N	C([C@@H]1[C@H]([C@@H]([C@](O1)(CO)O)O)O)O	439709	85:1065.0 86:372.0 87:1570.0 88:1347.0 89:11886.0 90:1027.0 91:450.0 94:125.0 95:108.0 96:150.0 97:341.0 98:337.0 99:854.0 100:2150.0 101:3537.0 102:951.0 103:87115.0 104:8453.0 105:4107.0 106:219.0 110:160.0 111:332.0 112:91.0 113:824.0 114:1370.0 115:1277.0 116:899.0 117:11742.0 118:1067.0 119:1473.0 120:185.0 121:95.0 124:47.0 125:43.0 126:175.0 127:390.0 129:7908.0 130:1485.0 131:4620.0 132:6…	45343	258762	17482	31718	2402	36097	2952	2002	731	2444	61797	12634	15554	19846	6492	11466	1282	1470	46004	659	7308	930	18040	942	4424	6771	14756	648	896	586	597894	819	349
31569	117	584895	fucose	Organic oxygen compounds	Organooxygen compounds	Carbohydrates and carbohydrate conjugates	Monosaccharides	sugars	1	GCMS		C6H12O5	SHZGCJCMOBCMKK-FPRJBGLDSA-N	C[C@@H]1[C@@H]([C@@H]([C@H]([C@@H](O1)O)O)O)O	439650	85:75.0 87:111.0 88:40.0 89:1323.0 90:89.0 91:104.0 99:12.0 100:605.0 101:338.0 102:122.0 103:1172.0 105:294.0 106:48.0 109:34.0 110:22.0 114:14.0 115:241.0 116:57.0 117:14287.0 118:1480.0 119:608.0 120:10.0 123:27.0 126:1.0 127:2.0 128:7.0 129:1134.0 130:379.0 131:959.0 132:109.0 133:835.0 134:163.0 140:8.0 142:6.0 143:263.0 144:33.0 145:34.0 147:1366.0 148:54.0 149:99.0 155:1.0 156:11.0 160:136…	202680	947172	67270	15289	18850	42368	128878	24025	21888	7794	4967	629486	30870	115271	174583	11891	6007	13388	256335	35602	14734	10500	214479	15510	90084	585740	11296	258062	338910	40284	3208	761708	41340
1718	245	390775	fumaric acid	Organic acids and derivatives	Carboxylic acids and derivatives	Dicarboxylic acids and derivatives	Dicarboxylic acids and derivatives	dicarboxylic acids	1	GCMS		C4H4O4	VZCYOOQTPOCHFL-OWOJBTEDSA-N	C(=C/C(=O)O)\C(=O)O	444972	85:548.0 86:69.0 87:80.0 91:65.0 95:3.0 98:3.0 99:1019.0 100:367.0 101:132.0 102:16.0 106:51.0 108:90.0 109:6.0 110:342.0 111:15.0 112:22.0 113:317.0 114:50.0 115:339.0 117:96.0 118:146.0 123:15.0 124:26.0 126:329.0 128:72.0 130:753.0 131:100.0 132:16.0 133:591.0 135:211.0 136:56.0 140:10.0 141:129.0 142:57.0 143:926.0 144:124.0 146:48.0 147:5175.0 148:610.0 149:671.0 151:31.0 152:3.0 153:7.0 154…	9541	2676	6211	3898	906	11135	1593	343	564	7114	1098	2265	8424	8051	2793	2887	3615	4579	2660	5624	10210	2521	2867	6775	8146	1152	12104	7978	27348	3156	1931	1507	3464
4706	292	690882	galactonic acid	Organic acids and derivatives	Hydroxy acids and derivatives	Medium-chain hydroxy acids and derivatives	Medium-chain hydroxy acids and derivatives	sugar acids	1	GCMS		C6H12O7	RGHNJXZEOKUKBD-MGCNEYSASA-N	C([C@H]([C@@H]([C@@H]([C@H](C(=O)O)O)O)O)O)O	128869	85:918.0 86:238.0 87:865.0 88:630.0 89:3376.0 90:737.0 91:316.0 95:57.0 96:68.0 97:1011.0 98:413.0 99:1406.0 100:448.0 101:4514.0 102:3806.0 103:26292.0 104:2417.0 105:1403.0 106:36.0 107:255.0 108:13.0 109:160.0 110:149.0 111:353.0 112:80.0 113:956.0 114:440.0 115:1587.0 116:1106.0 117:12863.0 118:1333.0 119:1189.0 124:209.0 125:121.0 126:8.0 127:610.0 128:752.0 129:11296.0 130:3317.0 131:4665.0…	6195	12801	4382	2134	1162	19754	5039	386	1181	830	6257	4047	5570	2622	4331	1764	973	1706	1059	1217	1213	1424	622	955	2038	1492	839	2275	532	439	217	503	1297
131445	333	669400	galacturonic acid	Organic oxygen compounds	Organooxygen compounds	Carbohydrates and carbohydrate conjugates	Sugar acids and derivatives	sugars	1	GCMS		C6H10O7	AEMOLEFTQBMNLQ-DTEWXJGMSA-N	[C@@H]1([C@H]([C@H](O[C@H]([C@@H]1O)O)C(=O)O)O)O	441476	85:1361.0 86:2529.0 88:750.0 89:21261.0 90:1552.0 91:867.0 92:119.0 93:210.0 94:209.0 95:161.0 98:431.0 99:2655.0 100:2868.0 101:4337.0 102:5377.0 103:12489.0 104:1477.0 105:12704.0 106:1273.0 107:408.0 109:208.0 110:156.0 111:792.0 112:799.0 113:1649.0 114:4067.0 115:3182.0 116:3013.0 117:3204.0 118:790.0 119:2407.0 120:446.0 121:317.0 122:92.0 125:201.0 126:859.0 127:1358.0 128:1637.0 129:8961.…	271024	23052	8324	99474	6946	856665	14108	2164	1141	1791	59222	29923	41154	111078	18133	1064	1015	1726	62807	5101	1198	847	64997	7515	9393	16526	851	25950	5514	13831	6879	1027	7766
8.03_259.13	259.13	8.034	gamma-Glutamylleucine	Organic acids and derivatives	Carboxylic acids and derivatives	Amino acids, peptides, and analogues	Peptides	di-peptides	1	HILIC ESI-	[M-H]-	C11H20N2O5	MYFMARDICOWMQP-YUMQZZPRSA-N	CC(C)C[C@@H](C(=O)O)NC(=O)CC[C@@H](C(=O)O)N	151023	56.57864:2062 78.78236:2058 82.02846:2573 88.14197:2162 96.15188:2396 96.9588:129251 128.03413:205934 130.08617:128048 152.73021:2402 170.94656:2346 191.05684:2226 197.12823:16499 215.13954:8680 223.10806:20385 241.11868:27255 259.01294:139300 259.12924:45074 259.15604:2694	62471	240059	147878	143579	1989	391372	16501	20301	70845	7310	136405	48133	31634	144987	205397	47978	2272	18189	151130	104179	58495	40565	273133	78756	200756	79013	175131	43113	86951	61996	95066	59852	16802
7.14_842.67	842.673	7.144	GlcCer 40:1;2O Isomer A	Lipids and lipid-like molecules	Sphingolipids	Glycosphingolipids	Glycosphingolipids	galactosylceramides	1	CSH ESI-	[M+CH3COO]-	C46H89NO8	YIGARKIIFOHVPF-YAEABVQUSA-N	CCCCCCCCCCCCCCCCCCCCCC(=O)N[C@@H](CO[C@H]1C(C([C@@H]([C@H](O1)CO)O)O)O)[C@@H](/C=C/CCCCCCCCCCCCC)O	6321359	71.01242:80513 82.54995:3218 85.02813:7378 87.0073:7579 89.02311:94879 95.01254:4352 100.93204:19343 101.02305:95299 101.93211:6134 102.79751:3486 113.02326:42631 115.91953:51230 116.92:23608 117.91714:7617 119.03361:38478 121.4498:3241 143.03392:8362 158.97456:23600 159.9752:7790 160.9743:4930 161.04427:19399 179.05489:30357 242.95766:3824 326.52457:3692 339.32681:6863 364.35657:15091 438.39453:…	510518	nd	nd	442142	nd	373935	nd	144221	16969	586918	nd	197846	nd	53148	nd	nd	nd	nd	nd	17673	182929	15945	24358	187823	81777	233764	26309	543591	96430	125507	nd	90299	18119
7.48_856.69	856.689	7.476	GlcCer 41:1;2O	Lipids and lipid-like molecules	Sphingolipids	Glycosphingolipids	Glycosphingolipids	galactosylceramides	1	CSH ESI-	[M+CH3COO]-	C47H91NO8	SJGWLQDELUWRDA-MUYAOIFFSA-N	CCCCCCCCCCCCCCCCCCCCCCC(=O)N[C@@H](CO[C@H]1C(C([C@@H]([C@H](O1)CO)O)O)O)[C@@H](/C=C/CCCCCCCCCCCCC)O	52931253	71.01253:39804 82.72174:3121 85.02805:6108 89.02301:35913 91.84958:4012 101.02325:37735 113.02299:17750 119.03354:8020 203.18649:5297 237.22487:3788 263.23743:4022 352.35648:4943 353.34232:6363 378.37344:22847 427.68872:3704 634.61407:64093 730.78973:4385 792.87848:4239 796.67352:63087	89579	nd	nd	43529	nd	126739	nd	114537	8093	305049	nd	53152	nd	22173	nd	8553	nd	nd	nd	nd	11116	nd	12099	8648	11012	64168	6436	133247	62455	nd	nd	54195	nd
7.80_870.71	870.705	7.796	GlcCer 42:1;2O	Lipids and lipid-like molecules	Sphingolipids	Glycosphingolipids	Glycosphingolipids	galactosylceramides	1	CSH ESI-	[M+CH3COO]-	C48H93NO8	POQRWMRXUOPCLD-AAAFHMTMSA-N	CCCCCCCCCCCCCCCCCCCCCCCC(=O)N[C@@H](CO[C@H]1C(C([C@@H]([C@H](O1)CO)O)O)O)[C@@H](/C=C/CCCCCCCCCCCCC)O	6321361	71.01253:110916 73.02802:4397 85.02805:8740 87.00734:7194 89.02312:111734 95.01284:4269 101.02316:115932 113.02322:61132 119.03362:39345 131.03397:5304 143.03307:8495 161.04459:20407 179.05522:25726 219.04929:3596 237.22279:4208 262.11298:3646 299.88712:3466 304.16928:6636 349.34821:4008 367.35941:14483 392.38806:19838 648.63055:47891 793.81085:4101 810.68372:237412	152512	nd	nd	97174	nd	162319	nd	72829	23905	339658	nd	28135	nd	18657	17635	nd	nd	nd	nd	nd	45528	nd	20462	nd	nd	46464	nd	317606	63611	nd	nd	38870	nd
4.84_862.63	862.625	4.84	GlcCer d34:1	Lipids and lipid-like molecules	Sphingolipids	Glycosphingolipids	Glycosphingolipids	galactosylceramides	1	CSH ESI+	[M+H]+	C40H77NO8	QIUDOQCPONPOLS-TWQPPMLVSA-N	CCCCCCCCCCCCCCCC(=O)N[C@@H](CO[C@H]1C(C([C@@H]([C@H](O1)CO)O)O)O)[C@@H](CC=CCCCCCCCCCCCC)O		81.96887:2951 184.07404:3029 202.7762:6665 220.38123:3562 223.69496:3578 230.10194:3319 243.79826:3964 252.26825:26206 264.26871:306634 282.27841:33560 502.4985:23047 520.50903:76808 653.45691:4170 726.5011:10099 844.61292:28511	717592	nd	21354	619992	nd	336549	nd	nd	nd	nd	58379	195267	6463	311468	28742	nd	nd	nd	nd	nd	nd	nd	13601	62615	nd	52994	nd	nd	41442	nd	nd	52416	nd
7.12_784.67	784.666	7.116	GlcCer d40:1	Lipids and lipid-like molecules	Sphingolipids	Glycosphingolipids	Glycosphingolipids	galactosylceramides	1	CSH ESI+	[M+H]+	C46H89NO8	QMYGQSYNQBLKGY-YAEABVQUSA-N	CCCCCCCCCCCCCCCCCCCCCCCC(=O)N[C@@H](CO[C@H]1C(C([C@@H]([C@H](O1)CO)O)O)O)[C@@H](/C=C/CCCCCCCCCCC)O	70699232	74.71876:3598 81.06992:8111 82.06493:21304 93.06989:6218 95.08527:14125 97.10096:3990 121.10137:6604 131.59602:4365 182.16251:3523 236.23749:43422 250.25301:21524 252.26862:79396 264.26886:862858 282.27969:76521 340.35809:15326 367.67532:3190 386.819:3361 515.75769:3918 551.72327:3149 574.59204:16436 586.59222:56222 588.60876:18512 604.60309:135604 766.65491:100169	240421	32871	nd	215257	nd	246080	7934	258675	60873	843279	nd	326774	7170	132090	50637	nd	10277	9306	58226	97369	148125	126677	122122	171004	107228	293630	14226	416000	222525	108561	nd	222011	95156
7.77_812.70	812.697	7.766	GlcCer d42:1	Lipids and lipid-like molecules	Sphingolipids	Glycosphingolipids	Glycosphingolipids	galactosylceramides	1	CSH ESI+	[M+H]+	C48H93NO8	SNVYJLGKALMFOP-MOLROICHSA-N	CCCCCCCCCCCCCCC[C@H]([C@H](CO[C@H]1C(C([C@@H]([C@H](O1)CO)O)O)O)NC(=O)CCCCCCCCCCCCC/C=C\CCCCCCCC)O	6321367	82.06525:7124 88.92908:3413 90.39516:3161 95.08562:3640 104.1978:3016 106.20812:3356 126.27328:3964 164.53687:3691 202.7776:6468 242.93968:3574 242.96745:3254 252.26884:38249 264.26892:414456 282.27933:38762 292.29861:13564 368.39023:7808 436.85367:3854 602.61548:6136 614.61853:30410 616.63995:4988 632.63367:57060 782.07361:3615 794.69012:54990	171263	10951	nd	152701	nd	199144	nd	186534	nd	436068	nd	172549	nd	95256	nd	nd	nd	nd	12220	13320	52524	59938	59058	24210	32320	148994	6388	404868	211254	11331	nd	110703	13758
7.09_810.68	810.682	7.092	GlcCer d42:2	Lipids and lipid-like molecules	Sphingolipids	Glycosphingolipids	Neutral glycosphingolipids	galactosylceramides	1	CSH ESI+	[M+H]+	C48H91NO8	WBOZIXHPUPAOIA-RBELZSLISA-N	CCCCCCCCCCCCC/C=C/[C@H]([C@H](CO[C@H]1C(C([C@@H]([C@H](O1)CO)O)O)O)NC(=O)CCCCCCCCCCCCC/C=C\CCCCCCCC)O	6321360	81.0698:4636 82.06504:16130 85.02859:4428 87.5067:3006 88.11233:6170 92.15716:3541 93.9656:3304 95.08567:18744 96.97853:3447 156.58774:3871 170.41188:3461 197.42482:12191 197.44693:18802 206.92108:3753 252.26846:72242 264.26871:729861 266.28607:4003 282.2789:66905 325.80481:3342 372.46722:3456 600.61407:5754 612.60638:53072 614.62439:13924 630.61835:97210 792.67181:72557	136433	32489	nd	156567	nd	37334	nd	61697	nd	189911	nd	149160	nd	94261	nd	nd	nd	nd	14975	30004	43467	25343	110574	14102	14087	84862	nd	428329	160705	nd	nd	40669	nd
3191	217	828606	glucoheptulose	Organic oxygen compounds	Organooxygen compounds	Carbohydrates and carbohydrate conjugates	Monosaccharides	monosaccharides	1	GCMS		C7H14O7	HSNZZMHEPUFJNZ-SHUUEZRQSA-N	C([C@H]([C@H]([C@H]([C@@H](C(=O)CO)O)O)O)O)O	5459879	85:139.0 86:13.0 89:1593.0 91:2.0 94:55.0 97:1692.0 98:126.0 99:121.0 100:313.0 101:365.0 103:5867.0 104:480.0 105:349.0 109:19.0 111:2.0 114:1800.0 115:154.0 116:242.0 117:2040.0 118:246.0 119:195.0 120:35.0 122:30.0 128:61.0 129:1591.0 130:174.0 131:183.0 133:1318.0 134:156.0 136:15.0 141:68.0 142:187.0 143:391.0 144:75.0 147:6372.0 148:889.0 149:623.0 152:13.0 154:11.0 156:61.0 157:517.0 158:1…	2413	12487	1350	3252	1171	16095	5604	1092	1411	708	1055	7240	794	4649	1367	1680	904	2448	1385	1524	1966	2624	10238	518	821	6383	2679	1504	790	764	494	1020	5264
7501	333	693148	gluconic acid	Organic acids and derivatives	Hydroxy acids and derivatives	Medium-chain hydroxy acids and derivatives	Medium-chain hydroxy acids and derivatives	phenolic natural products	1	GCMS		C6H12O7	RGHNJXZEOKUKBD-QTBDOELSSA-N	C([C@@H]([C@H]([C@@H]([C@@H](C(=O)O)O)O)O)O)O	6857417	87:39.0 89:155.0 99:15.0 100:306.0 101:268.0 102:393.0 103:2729.0 104:264.0 105:196.0 109:2.0 111:2.0 113:144.0 116:8.0 117:1117.0 118:12.0 127:30.0 129:1186.0 130:285.0 131:546.0 132:183.0 133:997.0 134:13.0 137:1.0 139:7.0 140:38.0 141:4.0 142:28.0 143:746.0 144:263.0 145:25.0 147:6161.0 148:1144.0 149:642.0 150:39.0 151:46.0 153:74.0 154:66.0 155:3.0 157:599.0 159:89.0 160:27.0 161:88.0 164:14…	12712	2941	4238	7922	688	54276	936	628	1891	306	2514	1733	2347	7910	4447	2220	342	172	782	503	223	519	1021	203	2119	2638	383	1844	622	283	379	606	540
22	319	659798	glucose	Organic oxygen compounds	Organooxygen compounds	Carbohydrates and carbohydrate conjugates	Monosaccharides	sugars	1	GCMS		C6H12O6	WQZGKKKJIJFFOK-VFUOTHLCSA-N	C([C@@H]1[C@H]([C@@H]([C@H]([C@@H](O1)O)O)O)O)O	64689	85:955.0 86:739.0 87:1963.0 88:1249.0 89:23654.0 90:1741.0 91:1135.0 94:110.0 95:64.0 96:681.0 97:924.0 98:177.0 99:1302.0 100:4269.0 101:5985.0 102:2628.0 103:55876.0 104:5298.0 105:6003.0 106:471.0 107:134.0 108:44.0 109:106.0 110:151.0 111:715.0 112:295.0 113:1157.0 114:1065.0 115:1902.0 116:1693.0 117:24869.0 118:2407.0 119:3013.0 120:325.0 121:179.0 122:26.0 125:71.0 126:224.0 127:784.0 128:…	54589	106630	9037	339758	2258	13676	4477	1115	1117	1888	12526	22501	17127	26753	18531	6604	3023	1342	11048	1850	1879	716	70372	4452	6746	55271	11587	16540	15470	2243	514404	10661	5935
3167	217	594647	glucose-1-phosphate	Organic oxygen compounds	Organooxygen compounds	Carbohydrates and carbohydrate conjugates	Monosaccharides	glucosephosphates	1	GCMS		C6H13O9P	HXXFSFRBOHSIMQ-VFUOTHLCSA-N	C([C@@H]1[C@H]([C@@H]([C@H]([C@H](O1)OP(=O)(O)O)O)O)O)O	65533	85:385.0 86:98.0 87:248.0 88:286.0 89:468.0 90:224.0 92:20.0 95:218.0 99:284.0 101:1180.0 103:1916.0 104:47.0 107:220.0 109:96.0 110:193.0 111:260.0 112:20.0 113:386.0 114:41.0 115:209.0 116:863.0 117:2309.0 118:189.0 119:243.0 125:12.0 126:151.0 128:127.0 129:1571.0 130:306.0 131:508.0 132:123.0 133:2331.0 134:352.0 135:130.0 136:1.0 139:40.0 140:858.0 141:105.0 142:138.0 143:915.0 144:125.0 145…	11749	6872	6771	7107	8940	14552	6377	2157	3008	2711	3454	4413	8738	5141	4021	3653	3569	3880	2645	2047	1811	2263	2496	4931	3837	2336	3082	3646	3155	5809	4665	1356	2483
8.80_146.04	146.045	8.796	Glutamic acid	Organic acids and derivatives	Carboxylic acids and derivatives	Amino acids, peptides, and analogues	Amino acids and derivatives	amino acids	1	HILIC ESI-	[M-H]-	C5H9NO4	WHUUTDBJXJRKMK-VKHMYHEASA-N	C(CC(=O)O)[C@@H](C(=O)[O-])[NH3+]	33032	59.47404:2168 61.10865:1777 61.98716:12355 67.92735:1731 74.23247:1872 86.75385:1839 107.25436:2073 124.66598:2052	23570292	40364935	9932976	6570305	1058026	34399832	4657607	19306143	66589610	2980778	16312262	7838743	18734137	12827451	16796783	16369457	9127330	28890763	39225367	45357879	6210243	28004221	39424129	10342526	47212668	44813060	17650714	38009264	14782882	49679103	7131558	55565446	54799830
8.62_145.06	145.061	8.623	Glutamine	Organic acids and derivatives	Carboxylic acids and derivatives	Amino acids, peptides, and analogues	Amino acids and derivatives	amino acids, basic	1	HILIC ESI-	[M-H]-	C5H10N2O3	ZDXPYRJPNDTMRX-VKHMYHEASA-N	C(CC(=O)O)[C@@H](C(=O)O)N	5961	52.62996:8539 127.05054:45948 128.03432:11450 145.06171:17079	17313487	19660491	9551554	12457439	76672	26762155	795642	2037829	10960845	417845	12746528	5334597	8328303	13202921	13978887	1002512	93606	307989	5145618	3807152	1133721	967079	17031329	1072204	6262656	1485331	5623993	5496965	3389658	12193316	1934633	9156445	4574311
8.62_311.12	311.124	8.619	Glutamyltyrosine	Organic acids and derivatives	Carboxylic acids and derivatives	Amino acids, peptides, and analogues	Amino acids and derivatives	di-peptides	1	HILIC ESI+	[M+H]+	C14H18N2O6	VVLXCWVSSLFQDS-QWRGUYRKSA-N	C1=CC(=CC=C1C[C@@H](C(=O)O)NC(=O)CC[C@@H](C(=O)O)N)O	94340	56.05:2695 63.49635:2415 71.30787:2450 84.04449:167866 91.05423:3026 91.33581:2898 102.055:3522 119.04938:41925 123.0441:87868 130.04991:92740 130.06027:4943 136.0498:3281 136.07574:474119 147.04402:69695 165.0547:593411 169.55138:2757 182.08124:571382 190.01707:10672 202.08653:76896 248.06308:2581 248.09154:76380 293.11166:3843 294.09735:80786 311.12411:119718	nd	17259	nd	4233	nd	nd	nd	12686	5137	nd	nd	8242	3215	nd	2536	nd	nd	2794	4075	34190	13510	28085	nd	7170	3702	4337	nd	10229	3919	23652	3306	nd	nd
16952	261	421596	glutaric acid	Organic acids and derivatives	Carboxylic acids and derivatives	Dicarboxylic acids and derivatives	Dicarboxylic acids and derivatives	dicarboxylic acids	1	GCMS		C5H8O4	JFCQEDHGNNZCLN-UHFFFAOYSA-N	C(CC(=O)O)CC(=O)O	743	85:4857.0 86:408.0 87:632.0 88:1429.0 89:752.0 92:72.0 93:162.0 94:11.0 95:581.0 97:15164.0 98:1176.0 99:2227.0 101:4169.0 102:981.0 103:27.0 106:67.0 107:367.0 110:432.0 111:140.0 113:709.0 114:83.0 115:2230.0 116:9480.0 117:5385.0 118:622.0 119:88.0 123:1269.0 124:368.0 126:294.0 127:328.0 128:231.0 129:14698.0 130:6115.0 131:3690.0 132:878.0 133:5237.0 138:106.0 140:284.0 141:16.0 142:59.0 143…	1433	1420	704	1545	5260	993	4828	2589	977	8606	324	2524	2819	1095	4529	6494	4198	1919	4789	21042	33405	20466	1967	8010	18062	2038	25142	1914	3686	2801	155	477	2909
394878	189	377308	glyceric acid	Organic oxygen compounds	Organooxygen compounds	Carbohydrates and carbohydrate conjugates	Sugar acids and derivatives	sugar acids	1	GCMS		C3H6O4	RBNPOMFGQQGHHO-UHFFFAOYSA-N	C(C(C(=O)O)O)O	752	87:1831.0 88:928.0 91:529.0 93:1041.0 95:791.0 96:1138.0 100:1947.0 101:4605.0 102:21019.0 103:23383.0 104:3795.0 105:2757.0 108:2348.0 113:722.0 114:762.0 115:3205.0 116:2271.0 117:2738.0 118:1986.0 119:2762.0 120:586.0 121:223.0 130:7187.0 131:5463.0 132:1954.0 133:25557.0 134:2586.0 135:3526.0 143:457.0 147:45511.0 148:10008.0 149:5843.0 150:825.0 152:713.0 158:59.0 159:395.0 160:155.0 163:804…	7403	3261	2223	4081	20138	5387	16793	2154	926	5233	4505	5789	9556	9192	1176	3126	1980	2599	4872	5816	5135	2736	3505	5458	9082	3624	9527	9692	6374	2308	1074	6017	4342
102844	205	344428	glycerol	Organic oxygen compounds	Organooxygen compounds	Carbohydrates and carbohydrate conjugates	Sugar alcohols	sugar alcohols	1	GCMS		C3H8O3	PEDCQBHIVMGVHV-UHFFFAOYSA-N	C(C(CO)O)O	753	86:35649.0 87:13782.0 89:52081.0 90:4636.0 91:2790.0 92:331.0 94:2130.0 95:638.0 96:309.0 97:382.0 98:441.0 99:3874.0 100:44651.0 101:54722.0 102:14716.0 103:190700.0 104:22113.0 105:17401.0 106:820.0 113:6809.0 114:4692.0 115:32295.0 116:19426.0 117:387803.0 118:38731.0 119:35848.0 127:1203.0 128:4038.0 129:54615.0 130:16196.0 131:81985.0 132:12409.0 133:263730.0 134:35271.0 135:20567.0 146:458.…	728548	814675	711702	361061	149349	323864	1861883	2586239	4153087	135102	391477	469616	205098	342186	877910	1915291	451124	1251738	1642426	2069133	1182067	1396921	2507479	923371	2767810	1012259	117591	1322722	571323	2393600	524995	535428	2786114
1693	204	805227	glycerol-3-galactoside	Lipids and lipid-like molecules	Glycerolipids	Glycosylglycerols	Glycosylglycerols	sugars	1	GCMS		C9H18O8	NHJUPBDCSOGIKX-NTXXKDEISA-N	C([C@@H]1[C@@H]([C@@H]([C@H]([C@@H](O1)OC[C@@H](CO)O)O)O)O)O	16048618	89:176.0 90:53.0 99:49.0 101:827.0 102:83.0 103:3126.0 104:331.0 105:191.0 109:15.0 113:33.0 115:65.0 116:293.0 117:746.0 118:35.0 119:28.0 122:1.0 123:8.0 128:61.0 129:2561.0 130:485.0 131:662.0 132:17.0 133:977.0 135:25.0 141:39.0 142:42.0 143:281.0 147:3311.0 148:255.0 149:318.0 151:50.0 155:78.0 156:127.0 157:175.0 159:38.0 160:42.0 161:110.0 163:57.0 169:415.0 170:55.0 171:14.0 175:57.0 177:…	154927	6799	20915	99554	3908	166765	5612	1933	1549	1363	84552	2937	1935	82626	7587	2028	2306	3228	7138	1815	1942	738	33907	1278	1711	45370	2474	2720	2367	1047	8099	1561	5276
1687	357	590747	glycerol-alpha-phosphate	Lipids and lipid-like molecules	Glycerophospholipids	Glycerophosphates	Glycerophosphates	glycerides	1	GCMS		C3H9O6P	AWUCVROLDVIAJX-UHFFFAOYSA-N	C(C(COP(=O)(O)O)O)O	754	85:750.0 87:846.0 88:468.0 89:1193.0 90:82.0 91:168.0 92:114.0 93:127.0 94:26.0 95:116.0 97:212.0 98:232.0 99:483.0 101:13348.0 102:1461.0 103:9463.0 104:991.0 105:689.0 106:35.0 107:239.0 108:36.0 109:51.0 111:385.0 113:2220.0 114:284.0 115:2195.0 116:2414.0 117:2066.0 118:407.0 119:755.0 120:59.0 121:349.0 122:90.0 123:101.0 125:30.0 127:73.0 129:6764.0 130:1365.0 131:6671.0 132:512.0 133:8224.…	2640	871	1366	8967	1794	1623	1530	197	492	991	1569	514	1089	6794	1421	825	725	548	207	633	903	566	3461	1473	1106	941	658	1718	1061	491	1254	384	672
8.40_76.04	76.0393	8.399	Glycine	Organic acids and derivatives	Carboxylic acids and derivatives	Amino acids, peptides, and analogues	Amino acids and derivatives	amino acids	1	HILIC ESI+	[M+H]+	C2H5NO2	DHMQDGOQFOQNFH-UHFFFAOYSA-N	C(C(=O)[O-])[NH3+]	5257127	51.53005:16728 52.88739:16865 59.61776:14924 71.15248:17029 76.03936:254118	36064947	41487129	4591954	1052499	86616	9979627	1638051	44487543	56514937	105502	14546192	23025204	4965130	2961041	8205894	41141497	36186872	33785008	56979403	47169273	25154761	34558593	46536602	5758861	26913702	39316424	563102	36044235	21384200	80480514	649154	40385823	45345352
1.26_285.08	285.075	1.265	Glycitein	Phenylpropanoids and polyketides	Isoflavonoids	Isoflav-2-enes	Isoflavones	phenolic natural products	1	HILIC ESI+	[M+H]+	C16H12O5	DXYUAIFZCFRPTH-UHFFFAOYSA-N	COC1=C(C=C2C(=C1)C(=O)C(=CO2)C3=CC=C(C=C3)O)O	5317750	60.12362:1930 76.59664:2255 99.05537:2381 157.1785:2265 192.28998:2276 225.05411:13098 229.08563:16618 232.04015:3066 270.05219:81370 285.07571:1347892	16526	25073	75454	nd	nd	nd	nd	nd	nd	nd	nd	nd	nd	nd	nd	nd	nd	nd	4377	13878	26975	22975	8593	nd	5563	8611	nd	nd	nd	nd	nd	nd	nd
GCDCA			Glycochenodeoxycholic acid	Lipids and lipid-like molecules	Steroids and steroid derivatives	Bile acids, alcohols and derivatives	Glycinated bile acids and derivatives	conjugated bile acids	1	LC-MS/MS_BA		C26H43NO5	GHCZAUBVMUEKKP-GYPHWSFCSA-N	C[C@H](CCC(=O)NCC(=O)O)[C@H]1CC[C@@H]2[C@@]1(CC[C@H]3[C@H]2[C@@H](C[C@H]4[C@@]3(CC[C@H](C4)O)C)O)C	12544	448.3/ 74	238672	1457	857204	1875857	7	280924	291	16360	6635	16	539533	238	84	1716492	984455	1221	6029	2626	687	7137	4629	3102	6899	63	5171	703	17	41701	1961	36718	6809	202	799
GCA			Glycocholic acid	Lipids and lipid-like molecules	Steroids and steroid derivatives	Bile acids, alcohols and derivatives	Glycinated bile acids and derivatives	conjugated bile acids	1	LC-MS/MS_BA		C26H43NO6	RFDAIACWWDREDC-FRVQLJSFSA-N	C[C@H](CCC(=O)NCC(=O)O)[C@H]1CC[C@@H]2[C@@]1([C@H](C[C@H]3[C@H]2[C@@H](C[C@H]4[C@@]3(CC[C@H](C4)O)C)O)O)C	10140	464.3 / 74	505147	3739	1100566	1772805	8	503966	251	17436	12162	46	857495	1201	237	1663695	1041688	3162	3883	438	4272	5662	5124	3591	5836	249	4228	2353	66	78951	2338	37073	42900	2743	6077
GDCA			Glycodeoxycholic acid	Lipids and lipid-like molecules	Steroids and steroid derivatives	Bile acids, alcohols and derivatives	Glycinated bile acids and derivatives	conjugated bile acids	1	LC-MS/MS_BA		C26H43NO5	WVULKSPCQVQLCU-BUXLTGKBSA-N	C[C@H](CCC(=O)NCC(=O)O)[C@H]1CC[C@@H]2[C@@]1([C@H](C[C@H]3[C@H]2CC[C@H]4[C@@]3(CC[C@H](C4)O)C)O)C	3035026	448.3 / 74	167097	477	674803	1240580	2	258868	58	4050	2315	5	163938	111	50	1145248	707226	605	2799	2895	225	1619	1571	874	2747	38	1712	235	15	25837	856	8400	1524	116	364
GHDCA			Glycohyodeoxycholic acid	Lipids and lipid-like molecules	Steroids and steroid derivatives	Bile acids, alcohols and derivatives	Glycinated bile acids and derivatives	conjugated bile acids	1	LC-MS/MS_BA		C26H43NO5	SPOIYSFQOFYOFZ-BRDORRHWSA-N	C[C@H](CCC(=O)NCC(=O)O)[C@H]1CC[C@@H]2[C@@]1(CC[C@H]3[C@H]2C[C@@H]([C@H]4[C@@]3(CC[C@H](C4)O)C)O)C	114611	448.3 / 74	85	7	41	37	nd	62	7	3	6	1	25	11	nd	72	19	38	98	436	10	7	1	7	45	nd	3	40	1	30	10	82	4	nd	1
1971	177	227636	glycolic acid	Organic acids and derivatives	Hydroxy acids and derivatives	Alpha hydroxy acids and derivatives	Alpha hydroxy acids and derivatives	conjugated bile acids	1	GCMS		C2H4O3	AEMRFAOFKBGASW-UHFFFAOYSA-N	C(C(=O)O)O	757	86:321.0 87:877.0 88:2215.0 89:1177.0 90:166.0 92:46.0 95:690.0 98:47.0 99:43.0 100:1.0 101:491.0 102:395.0 103:3236.0 104:445.0 105:759.0 106:5.0 107:431.0 110:197.0 113:123.0 114:1.0 115:778.0 116:235.0 117:2708.0 118:351.0 119:694.0 120:123.0 121:18.0 124:3.0 131:2476.0 132:305.0 133:6921.0 134:1259.0 135:297.0 144:1.0 146:382.0 147:57199.0 148:9255.0 149:5731.0 150:464.0 151:221.0 161:3331.0 …	3468	7099	5926	7550	21085	5263	20728	4953	617	1518	1848	4500	7825	8456	270	3443	5420	5341	4373	7927	15899	5885	3427	7665	16170	10556	9455	9753	10926	4228	572	421	4068
GLCA			Glycolithocholic acid	Lipids and lipid-like molecules	Steroids and steroid derivatives	Bile acids, alcohols and derivatives	Glycinated bile acids and derivatives	conjugated bile acids	1	LC-MS/MS_BA		C26H43NO4	XBSQTYHEGZTYJE-OETIFKLTSA-N	C[C@H](CCC(=O)NCC(=O)O)[C@H]1CC[C@@H]2[C@@]1(CC[C@H]3[C@H]2CC[C@H]4[C@@]3(CC[C@H](C4)O)C)C	115245	432.3 / 74	149	nd	79	212	nd	46	nd	16	12	nd	7	nd	nd	277	286	2	16	nd	nd	28	10	5	292	nd	12	8	nd	85	8	26	6	nd	nd
GUDCA			Glycoursodeoxycholic acid	Lipids and lipid-like molecules	Steroids and steroid derivatives	Bile acids, alcohols and derivatives	Glycinated bile acids and derivatives	conjugated bile acids	1	LC-MS/MS_BA		C26H43NO5	GHCZAUBVMUEKKP-XROMFQGDSA-N	C[C@H](CCC(=O)NCC(=O)O)[C@H]1CC[C@@H]2[C@@]1(CC[C@H]3[C@H]2[C@H](C[C@H]4[C@@]3(CC[C@H](C4)O)C)O)C	12310288	448.3/ 74	12548	83	41435	51288	nd	19931	5	404	191	nd	39105	14	28	48077	30836	64	144	700	24	133	184	74	823	nd	154	46	1	2375	277	391	729	21	44
7.73_189.12	189.123	7.734	Gly-Ile	Organic acids and derivatives	Carboxylic acids and derivatives	Amino acids, peptides, and analogues	Peptides	di-peptides	1	HILIC ESI+	[M+H]+	C8H16N2O3	KGVHCTWYMPWEGN-UHFFFAOYSA-N	CCC(C)C(C(=O)O)NC(=O)CN	259613	55.05458:4891 56.79312:2133 57.28362:2143 59.35772:2402 60.08109:62653 60.84185:2212 69.06985:9941 72.08092:203674 75.05544:23204 84.04447:4145 85.02839:2791 86.09653:462858 92.69865:2290 101.07088:4771 102.05466:2794 106.69636:2207 118.08631:94339 124.0805:2397 125.08718:2765 128.07559:16206 129.05458:2474 130.04996:135046 132.10197:198928 140.47414:2177 143.11826:257781 153.08136:3839 155.5455:…	856762	1352858	1585674	1151113	184558	567951	221029	236686	286604	163364	1103239	491342	292504	1459715	1441227	330700	270078	222175	820926	541835	293742	261888	2966678	472968	737866	726477	662513	335452	489944	445483	612860	360875	178498
8.57_173.09	173.092	8.568	Gly-Pro	Organic acids and derivatives	Carboxylic acids and derivatives	Amino acids, peptides, and analogues	Peptides	di-peptides	1	HILIC ESI+	[M+H]+	C7H12N2O3	KZNQNBZMBZJQJO-UHFFFAOYSA-N	C1CC(N(C1)C(=O)CN)C(=O)O	44369312	70.06518:19782 70.92867:1777 85.61713:2151 100.11197:4348 113.05959:3493 116.07069:97068 127.0864:4043 128.14365:3142 135.39746:1876 136.97945:2029 153.93524:2180 173.0784:2608 173.08263:2434 173.09247:18713 173.10747:5014	1363608	4765093	1924175	685577	12634	1250883	155531	572511	641990	53272	3044726	2042628	110737	3059604	1547531	602732	284530	517609	2759950	3058657	459129	1377635	5782021	298357	497737	1260698	274560	139871	343955	1231078	81679	711434	564831
7.96_173.09	173.092	7.958	Gly-Val	Organic acids and derivatives	Carboxylic acids and derivatives	Amino acids, peptides, and analogues	Peptides	di-peptides	1	HILIC ESI-	[M-H]-	C7H14N2O3	STKYPAFSDFAEPH-UHFFFAOYSA-N	CC(C)C(C(=O)O)NC(=O)CN	97417	58.02837:27984 64.94673:2017 65.15781:2054 67.01757:3603 69.03339:8253 72.99172:19933 74.02338:118972 83.01263:5152 85.02816:135108 87.05496:2217 89.43114:2085 89.63193:2258 93.03331:22823 95.71233:1983 99.00717:20978 99.04392:2440 100.31655:2335 101.02305:32297 105.01782:4440 111.00749:459087 111.08018:11796 112.01089:8374 113.02319:4787 116.07039:8849 123.12872:2251 127.08681:2251 129.01808:608…	1048392	1508369	1520443	1449685	13667	1555639	59019	69764	79919	47442	970271	375607	162403	1645348	2313638	139876	38299	87826	694628	271986	193593	135161	3342695	322103	850709	577104	801487	215449	624179	321104	557435	196287	53300
7.24_282.08	282.084	7.242	Guanosine	Nucleosides, nucleotides, and analogues	Purine nucleosides		Purine nucleosides	nucleoside metabolite	1	HILIC ESI-	[M-H]-	C10H13N5O5	NYHBQMYGNKIUIF-UUOKFMHZSA-N	C1=NC2=C(N1[C@H]3[C@@H]([C@@H]([C@H](O3)CO)O)O)N=C(NC2=O)N	6802	51.59669:1867 51.89763:1985 90.73752:2219 91.00842:2434 92.37911:2582 107.03491:3738 112.98507:2656 130.08565:15518 133.01457:33357 150.04103:504493 162.70239:2026 201.43459:3191 282.08426:158278	153571	137826	60523	286817	1971	157659	61843	1933	2760	4419	247286	84358	106796	156968	64947	10327	1511	820	18951	16260	2029	6267	128962	9179	160655	169418	174872	31763	273126	38035	61725	86337	31764
8.36_344.04	344.04	8.363	Guanosine-3',5'-cyclic monophosphate	Nucleosides, nucleotides, and analogues	Purine nucleotides	Cyclic purine nucleotides	3',5'-cyclic purine nucleotides	nucleoside metabolite	1	HILIC ESI-	[M-H]-	C10H12N5O7P	ZOOGRGPOEVQQDX-UUOKFMHZSA-N	C1[C@@H]2[C@H]([C@H]([C@@H](O2)N3C=NC4=C3N=C(NC4=O)N)O)OP(=O)(O1)O	24316	61.22169:2278 107.78756:2593 118.79834:2167 133.01457:21925 150.04105:286508 173.87064:2321 210.87444:2703 310.4111:2270 344.04169:23902	16903	2365	7932	8169	760	17848	512	nd	nd	397	2114	nd	687	1931	3928	nd	615	nd	847	nd	868	669	23843	14147	nd	nd	1172	nd	2379	nd	952	2343	4296
255	217	704741	hexitol	Organic oxygen compounds	Organooxygen compounds	Carbohydrates and carbohydrate conjugates	Sugar alcohols	sugar alcohols	1	GCMS		C6H14O6	FBPFZTCFMRRESA-UHFFFAOYSA-N	C(C(C(C(C(CO)O)O)O)O)O	453	85:79.0 88:37.0 92:32.0 94:14.0 97:41.0 99:235.0 100:26.0 101:41.0 102:73.0 103:1566.0 104:206.0 105:96.0 109:97.0 110:36.0 111:111.0 112:66.0 113:39.0 114:55.0 115:112.0 116:320.0 117:397.0 118:41.0 119:91.0 127:84.0 129:2437.0 130:240.0 131:990.0 132:120.0 133:2109.0 135:188.0 136:36.0 138:15.0 141:58.0 142:51.0 143:712.0 144:95.0 146:64.0 147:9643.0 148:1032.0 149:1104.0 150:133.0 151:66.0 153…	3145	2598	1611	1485	832	6879	940	1442	1677	623	804	821	542	723	3345	1094	1844	2684	1600	787	1554	1596	265	413	1296	996	696	660	974	632	1087	712	1202
14775	333	673957	hexuronic acid	Organic oxygen compounds	Organooxygen compounds	Carbohydrates and carbohydrate conjugates	Sugar acids and derivatives	sugars	1	GCMS		C6H10O7	IAJILQKETJEXLJ-UHFFFAOYSA-N	C(=O)C(C(C(C(C(=O)O)O)O)O)O	152867	85:14.0 86:64.0 87:204.0 88:53.0 89:1102.0 90:64.0 91:56.0 99:34.0 100:167.0 101:92.0 102:311.0 103:1518.0 104:119.0 105:291.0 107:7.0 109:6.0 110:4.0 111:8.0 112:15.0 113:6.0 114:63.0 115:99.0 116:80.0 117:335.0 118:24.0 119:103.0 121:3.0 124:8.0 126:10.0 127:11.0 128:44.0 129:549.0 130:240.0 131:339.0 132:38.0 133:708.0 134:80.0 135:46.0 136:3.0 138:5.0 139:43.0 140:2.0 141:1.0 142:54.0 143:698…	26234	1347	26259	15920	762	14901	1920	396	602	437	5088	616	1206	9362	11985	375	449	1313	701	491	203	189	10636	559	1034	4473	424	5081	2508	1056	1488	384	635
8.28_112.09	112.087	8.283	Histamine	Organic nitrogen compounds	Organonitrogen compounds	Amines	Primary amines	biogenic monoamines	1	HILIC ESI+	[M+H]+	C5H9N3	NTYJJOPFIAHURM-UHFFFAOYSA-N	C1=C(NC=N1)CCN	774	52.06471:1660 60.32823:1959 68.04967:1857 83.0605:4070 86.91504:1861 95.06048:82168 112.0394:2577 112.0502:2490 112.08717:18166	12740923	372855	183699	3473219	934433	56134844	1148547	2219189	1598288	1688749	205587	1161894	2401177	3539506	910812	3087756	1647555	2052409	1785829	3649504	1972268	1354239	1213936	2700201	2399580	5918900	2848458	693286	3691332	843816	3396881	5681254	40617612
9.58_154.06	154.061	9.578	Histidine	Organic acids and derivatives	Carboxylic acids and derivatives	Amino acids, peptides, and analogues	Amino acids and derivatives	amino acids	1	HILIC ESI-	[M-H]-	C6H9N3O2	HNDVDQJCIGZPNO-YFKPBYRVSA-N	C1=C(NC=N1)C[C@@H](C(=O)O)N	6274	65.15746:35471 67.0288:477948 70.33352:41292 72.00784:986324 73.93871:36425 80.03665:427686 81.04454:863136 93.04458:5162195 108.05569:894793 109.0396:531427 110.06255:75544 110.07119:2120760 118.03982:262189 127.95577:35138 136.05055:1482799 137.03461:5473992 138.03752:47242 151.03743:43048 154.06125:19470294	3935368	5710299	2036898	2050003	24678	2267245	378350	791153	2426791	52968	2064702	2388009	2408321	1988318	7950463	4795023	744443	3663220	4210986	3895325	607547	538598	9270326	6664927	3968951	5086789	1246865	2068953	6782520	6863609	1549473	4977100	2651397
114270	104	434422	hydrocinnamic acid	Phenylpropanoids and polyketides	Phenylpropanoic acids		Phenylpropanoic acids	phenolic natural products	1	GCMS		C9H10O2	XMIIGOLPHOKFCH-UHFFFAOYSA-N	C1=CC=C(C=C1)CCC(=O)O	107	87:151.0 88:97.0 89:407.0 90:38.0 91:5899.0 92:317.0 95:25.0 97:26.0 99:208.0 101:354.0 102:462.0 103:1538.0 104:16884.0 105:1908.0 106:92.0 107:102.0 108:17.0 109:55.0 111:38.0 112:47.0 114:127.0 115:166.0 116:530.0 121:73.0 122:16.0 124:42.0 125:56.0 126:15.0 129:95.0 131:794.0 132:579.0 134:87.0 135:44.0 136:59.0 138:21.0 140:28.0 141:52.0 145:107.0 146:114.0 150:22.0 151:57.0 155:54.0 156:43.…	17674	11219	7282	3579	385526	7023	191127	8849	36323	81189	19417	43647	71708	6712	7710	14353	44658	21060	36143	236488	191403	60851	18621	93958	162561	17929	379710	79390	40818	108253	779	4060	23761
16709	239	422583	hydroquinone	Benzenoids	Phenols	Benzenediols	Hydroquinones	phenolic natural products	1	GCMS		C6H6O2	QIGBRXMKCJKVMJ-UHFFFAOYSA-N	C1=CC(=CC=C1O)O	785	85:15.0 86:19.0 88:14.0 91:275.0 94:176.0 95:72.0 96:114.0 97:3.0 98:65.0 110:71.0 112:755.0 113:60.0 120:6.0 123:15.0 124:34.0 130:1.0 134:225.0 135:23.0 138:35.0 140:20.0 144:12.0 147:267.0 167:13.0 174:41.0 182:51.0 196:25.0 211:51.0 212:37.0 223:305.0 224:15.0 225:20.0 237:5.0 239:2779.0 240:576.0 241:199.0 254:1651.0 255:346.0 256:81.0 258:5.0 261:4.0 299:12.0 301:9.0 316:15.0 327:20.0 333:7…	1589	894	3329	2813	11003	949	8747	1501	2717	4815	618	504	2350	2833	1830	1729	1602	1777	1357	1936	2256	3012	842	3900	2623	1606	2130	1997	2415	1014	323	1032	1889
130396	278	325318	hydroxycarbamate	Organic acids and derivatives	Organic carbonic acids and derivatives		Organic carbonic acids and derivatives	carbonic acid	1	GCMS		CH3NO3	DRAJWRKLRBNJRQ-UHFFFAOYSA-M	[O-]C(=O)NO	16639161	86:3909.0 89:5546.0 91:162.0 98:928.0 100:9202.0 103:3112.0 104:804.0 105:1118.0 109:43.0 115:2742.0 116:1447.0 117:1902.0 118:782.0 119:6979.0 120:481.0 121:178.0 123:62.0 131:6529.0 133:21267.0 134:4246.0 135:2007.0 144:446.0 145:185.0 147:31804.0 152:25.0 160:14456.0 161:3001.0 162:1040.0 163:900.0 169:62.0 188:1604.0 196:22.0 205:1022.0 206:398.0 207:1225.0 208:224.0 213:39.0 215:46.0 221:679…	2572	1793	7694	3975	762	1012	4417	268	236	5573	1561	2821	4404	4216	214	3330	5059	6014	3201	3422	6603	1472	2018	4152	3294	1334	5207	4063	172	3044	741	1308	1964
170785	146	250536	hydroxylamine	Homogeneous non-metal compounds	Homogeneous other non-metal compounds		Homogeneous other non-metal compounds	hydroxylamine	1	GCMS		H3NO	AVXURJPOCDRRFD-UHFFFAOYSA-N	NO	787	85:1551.0 86:18668.0 87:6866.0 88:4146.0 89:1152.0 90:248.0 91:195.0 94:37.0 95:185.0 96:87.0 99:1031.0 100:11932.0 101:2035.0 102:2824.0 103:1946.0 104:427.0 105:507.0 106:193.0 112:77.0 113:2679.0 114:2485.0 115:1986.0 116:2598.0 117:3531.0 118:933.0 119:28777.0 120:3663.0 121:2005.0 122:90.0 123:36.0 128:129.0 129:321.0 130:13937.0 131:6231.0 132:4075.0 133:35994.0 134:5994.0 135:2633.0 136:23…	397317	352103	628395	725309	1234801	225296	1338603	389988	25120	819326	198642	201873	567903	386968	71770	514203	628906	651549	316440	414188	669503	533476	246146	852172	708320	312243	551600	544983	357954	348653	64112	199112	409115
4.95_135.03	135.03	4.952	Hypoxanthine	Organoheterocyclic compounds	Imidazopyrimidines	Purines and purine derivatives	Purinones	nucleoside metabolite	1	HILIC ESI-	[M-H]-	C5H4N4O	FDGQSTZJBFJUBT-UHFFFAOYSA-N	C1=NC2=C(N1)C(=O)N=CN2	790	51.68858:42414 62.8714:44553 64.33763:40550 65.01331:64810 88.83016:41200 92.02419:1887569 111.16091:41538 126.04727:43050 135.0302:1822209	2307260	14552343	93509	88366	189164	5626190	1388880	848228	8540120	185059	2553538	1421452	2839702	426494	422129	10999044	99832	50647	1117385	6819180	120982	1676000	13490641	6145575	7480683	6469463	3450809	529581	6493032	8874408	2691739	9169548	660394
69	202	684929	indole-3-acetate	Organoheterocyclic compounds	Indoles and derivatives	Indolyl carboxylic acids and derivatives	Indole-3-acetic acid derivatives	indoles	1	GCMS		C10H9NO2	SEOVTRFCIGRIMH-UHFFFAOYSA-N	C1=CC=C2C(=C1)C(=CN2)CC(=O)O	802	85:142.0 87:38.0 89:42.0 91:40.0 100:21.0 101:105.0 102:208.0 105:43.0 115:43.0 116:34.0 119:53.0 121:26.0 128:130.0 129:377.0 130:199.0 131:197.0 133:47.0 145:101.0 148:147.0 157:44.0 160:50.0 161:30.0 167:14.0 169:17.0 170:37.0 172:34.0 174:29.0 184:57.0 186:179.0 187:57.0 200:136.0 201:41.0 202:3519.0 203:606.0 204:162.0 217:45.0 226:14.0 228:28.0 276:55.0 319:239.0 320:67.0 321:16.0 330:17.0 …	539	694	349	696	2574	705	2884	629	626	2219	275	859	2110	612	612	1468	1731	1470	2192	15359	28320	11741	1294	4992	5921	603	29245	496	2027	3292	225	310	1026
2.38_204.07	204.066	2.377	Indolelactic acid	Organoheterocyclic compounds	Indoles and derivatives	Indolyl carboxylic acids and derivatives	Indolyl carboxylic acids and derivatives	indoles	1	HILIC ESI-	[M-H]-	C11H11NO3	XGILAAMKEQUXLS-UHFFFAOYSA-N	C1=CC=C2C(=C1)C(=CN2)CC(C(=O)O)O	92904	72.99177:22926 81.82378:1985 83.44885:1980 91.99854:1980 97.25819:1978 99.87782:2298 116.04937:24119 118.08593:2100 119.89043:2013 124.03896:3601 128.04973:7881 130.06534:9705 132.04437:3049 142.06532:19240 144.04509:2919 146.0943:2079 158.04558:4087 158.06027:107417 168.03801:1996 173.98633:3308 186.05522:47500 201.17291:4057 203.9971:39821 204.06616:200253	11686	53753	683	3006	1026	172951	5950	603060	752779	11468	263414	324340	84905	2021	10289	886311	1179646	811585	516670	713499	434060	63665	86484	537963	1931203	952385	1487547	29337	946959	3231430	2374	520450	422026
6.30_267.07	267.073	6.3	Inosine	Nucleosides, nucleotides, and analogues	Purine nucleosides		Purine nucleosides	nucleoside metabolite	1	HILIC ESI-	[M-H]-	C10H12N4O5	UGQMRVRMYYASKQ-KQYNXXCUSA-N	C1=NC(=O)C2=C(N1)N(C=N2)[C@H]3[C@@H]([C@@H]([C@H](O3)CO)O)O	6021	55.76499:2055 68.9209:1940 70.04684:2091 70.09868:1822 71.63646:1965 135.03009:264149 137.56465:2156 169.70346:1984 202.76695:3939 267.07358:192501	268564	392860	78461	285844	11329	342046	288303	55253	55826	34740	233328	265757	389807	244553	121655	102692	14331	10278	136801	106922	41094	53458	274697	75175	421389	650540	515862	77368	1117262	67592	287891	652045	321196
17442	307	1020095	isochlorogenic acid	Organic oxygen compounds	Organooxygen compounds	Alcohols and polyols	Cyclic alcohols and derivatives	phenolic natural products	1	GCMS		C16H18O9	CWVRJTMFETXNAD-NXLLHMKUSA-N	C1[C@H]([C@@H]([C@@H](C[C@]1(C(=O)O)O)OC(=O)/C=C/C2=CC(=C(C=C2)O)O)O)O	5280633	85:800.0 86:60.0 87:526.0 88:400.0 89:993.0 90:116.0 91:1660.0 92:246.0 93:1274.0 94:328.0 95:789.0 96:144.0 97:437.0 98:39.0 99:896.0 100:100.0 101:2162.0 102:471.0 103:5418.0 104:405.0 105:1222.0 106:104.0 107:202.0 109:567.0 111:584.0 112:99.0 113:597.0 114:109.0 115:2615.0 116:996.0 117:3212.0 118:331.0 119:982.0 120:139.0 121:652.0 122:100.0 123:403.0 124:25.0 125:325.0 127:615.0 128:292.0 1…	5684	4921	8805	9541	5882	2288	6186	4329	3070	17369	3352	3042	10084	5897	2959	9427	7062	8486	5054	5291	6093	4458	2429	11424	8021	1617	27945	7099	2229	3302	904	1673	6679
32122	245	617338	isocitric acid	Organic acids and derivatives	Carboxylic acids and derivatives	Tricarboxylic acids and derivatives	Tricarboxylic acids and derivatives	carboxylic acids	1	GCMS		C6H8O7	ODBLHEXUDAPZAU-ZAFYKAAXSA-N	C([C@@H]([C@H](C(=O)O)O)C(=O)O)C(=O)O	5318532	85:2447.0 86:626.0 87:1258.0 88:847.0 89:1234.0 90:260.0 91:1069.0 92:228.0 93:230.0 94:47.0 95:3308.0 97:857.0 98:490.0 99:1992.0 100:157.0 101:1347.0 102:1246.0 103:1778.0 104:706.0 105:2996.0 106:205.0 107:136.0 108:170.0 109:137.0 110:130.0 111:512.0 112:175.0 113:5118.0 114:643.0 115:1659.0 116:2844.0 117:4523.0 118:958.0 119:1389.0 120:194.0 121:151.0 122:61.0 123:48.0 124:33.0 125:32.0 126…	1477	1079	1384	1414	544	11854	15618	173	186	395	3285	166	486	1584	265	183	363	225	269	411	365	234	167	541	356	267	434	182	263	203	542	133	214
100866	333	698302	isohexonic acid	Organic acids and derivatives	Hydroxy acids and derivatives	Medium-chain hydroxy acids and derivatives	Medium-chain hydroxy acids and derivatives	sugar acids	1	GCMS		C6H12O7	RGHNJXZEOKUKBD-UHFFFAOYSA-N	C(C(C(C(C(C(=O)O)O)O)O)O)O	604	85:4516.0 86:1527.0 87:7244.0 88:3762.0 89:20346.0 90:1668.0 91:1161.0 92:385.0 93:296.0 94:327.0 95:832.0 96:443.0 97:3951.0 98:678.0 99:5414.0 100:1202.0 101:19281.0 102:19463.0 103:145699.0 104:14299.0 105:7979.0 106:535.0 107:1368.0 108:238.0 109:357.0 110:174.0 111:2060.0 112:443.0 113:4047.0 114:728.0 115:6155.0 116:5400.0 117:71550.0 118:7479.0 119:7784.0 120:708.0 121:457.0 122:71.0 123:2…	14278	496	269	1242	841	101579	2115	489	774	200	3011	833	731	10698	1468	952	1101	492	770	158	436	600	2175	152	868	353	278	3066	229	136	104	196	348
127715	160	983199	isomaltose	Organic oxygen compounds	Organooxygen compounds	Carbohydrates and carbohydrate conjugates	Glycosyl compounds	sugars	1	GCMS		C12H22O11	DLRVVLDZNNYCBX-RTPHMHGBSA-N	C([C@@H]1[C@H]([C@@H]([C@H]([C@H](O1)OC[C@@H]2[C@H]([C@@H]([C@H](C(O2)O)O)O)O)O)O)O)O	439193	87:1211.0 88:604.0 89:4249.0 90:267.0 91:161.0 92:118.0 93:181.0 94:152.0 95:320.0 96:360.0 97:526.0 98:240.0 100:1628.0 101:6670.0 102:1545.0 103:10592.0 104:885.0 105:2387.0 107:114.0 108:114.0 109:551.0 110:107.0 111:1453.0 112:323.0 113:908.0 115:449.0 116:1006.0 117:8267.0 118:577.0 119:1599.0 124:48.0 125:234.0 126:350.0 127:713.0 128:652.0 129:7394.0 130:2008.0 131:1916.0 132:620.0 133:609…	3290	1471	1923	2387	1245	1422	697	441	307	653	3546	447	695	649	273	763	2439	2325	492	380	1183	277	927	796	354	770	673	452	518	418	2591	546	315
IA			Isovaleric Acid	Lipids and lipid-like molecules	Fatty Acyls	Fatty acids and conjugates	Branched fatty acids	SCFAs	1	SCFA_GC		C5H10O2	GWYFCOCPABKNJV-UHFFFAOYSA-N	CC(C)CC(=O)O	10430		6	7	1	2	5	11	1	15	23	91	nd	16	259	5	1	12	20	22	15	47	47	44	8	15	27	7	70	4	12	28	nd	2	12
101725	147	386511	itaconic acid	Lipids and lipid-like molecules	Fatty Acyls	Fatty acids and conjugates	Branched fatty acids	succinates	1	GCMS		C5H6O4	LVHBHZANLOWSRM-UHFFFAOYSA-N	C=C(CC(=O)O)C(=O)O	811	92:53.0 94:44.0 95:223.0 96:124.0 97:3511.0 98:1385.0 101:481.0 103:529.0 104:70.0 105:199.0 111:73.0 112:51.0 113:132.0 115:136.0 116:86.0 118:39.0 119:269.0 120:15.0 122:569.0 123:35.0 125:60.0 126:53.0 127:28.0 131:790.0 132:78.0 133:1425.0 135:116.0 140:253.0 141:906.0 142:427.0 143:125.0 144:23.0 145:19.0 146:82.0 147:38445.0 148:6215.0 149:3614.0 151:19.0 155:64.0 156:81.0 157:185.0 159:50.…	9371	16968	4750	6245	33812	5766	14570	41304	28578	21473	4312	13271	33229	12387	11458	84311	60795	38081	37613	87948	83781	77477	11744	144920	128961	22300	123368	21219	35850	54667	1093	25537	64612
210712	218	769709	kynurenine	Organic oxygen compounds	Organooxygen compounds	Carbonyl compounds	Ketones	amino acids	1	GCMS		C10H12N2O3	YGPSJZOEDVAXAB-UHFFFAOYSA-N	C1=CC=C(C(=C1)C(=O)CC(C(=O)O)N)N	25245862	85:61.0 86:203.0 87:88.0 88:39.0 89:88.0 90:106.0 91:556.0 92:336.0 93:61.0 94:42.0 96:61.0 97:218.0 99:34.0 100:1226.0 101:176.0 102:110.0 103:521.0 104:98.0 105:223.0 106:72.0 111:32.0 114:277.0 115:249.0 116:161.0 117:190.0 118:1701.0 119:339.0 120:411.0 121:121.0 123:38.0 128:66.0 129:162.0 130:879.0 131:491.0 132:570.0 133:536.0 134:815.0 135:221.0 136:16.0 139:33.0 143:50.0 144:162.0 145:69…	967	752	1001	8307	925	1127	777	474	1148	660	325	438	433	690	566	717	511	810	334	284	635	1091	376	396	1180	3623	361	4693	242	416	275	221	778
80	191	217657	lactic acid	Organic acids and derivatives	Hydroxy acids and derivatives	Alpha hydroxy acids and derivatives	Alpha hydroxy acids and derivatives	SCFAs	1	GCMS		C3H6O3	JVTAAEKCZFNVCJ-UHFFFAOYSA-N	CC(C(=O)O)O	612	85:8684.0 86:6573.0 87:72227.0 88:111565.0 89:22391.0 90:1554.0 91:2622.0 92:778.0 93:502.0 94:4760.0 95:1164.0 96:739.0 97:892.0 98:246.0 99:4891.0 100:2372.0 101:61750.0 102:48891.0 103:46949.0 104:6822.0 105:17397.0 106:1817.0 107:2274.0 108:297.0 109:91.0 111:450.0 113:4576.0 114:1039.0 115:35415.0 116:15880.0 117:1091636.0 118:122979.0 119:56962.0 120:3499.0 121:613.0 126:206.0 127:1515.0 12…	8895	63234	27169	10358	12740	1358	19175	8184	546	59944	122667	60816	10656	9532	814	6646	8167	20140	7628	8300	39880	10989	43715	16261	14172	13530	7076	22444	223	10059	2576	8479	5820
62247	361	959541	lactitol	Lipids and lipid-like molecules	Fatty Acyls	Fatty acyl glycosides	Fatty acyl glycosides of mono- and disaccharides	sugars	1	GCMS		C12H24O11	VQHSOMBJVWLPSR-JVCRWLNRSA-N	C([C@@H]1[C@@H]([C@@H]([C@H]([C@@H](O1)O[C@H]([C@@H](CO)O)[C@@H]([C@H](CO)O)O)O)O)O)O	157355	85:15165.0 86:3999.0 87:9771.0 88:6313.0 89:90957.0 90:7984.0 91:5304.0 92:614.0 93:862.0 94:1584.0 95:2674.0 96:1615.0 97:15793.0 98:2935.0 99:12184.0 100:25041.0 101:32274.0 102:16565.0 103:350649.0 104:34478.0 105:29796.0 106:4794.0 107:1805.0 108:900.0 109:11519.0 110:2403.0 111:9672.0 112:2642.0 113:15560.0 114:7078.0 115:12952.0 116:16047.0 117:175394.0 118:18910.0 119:17415.0 120:1844.0 12…	5250	5178	1746	4278	1171	25919	1474	588	312	398	3800	661	562	5593	775	1658	213	2939	3050	447	279	360	527	480	477	3107	762	132	331	167	14703	7994	656
6.81_972.73	972.735	6.814	Lactosylceramide d18:1/24:1 15Z	Lipids and lipid-like molecules	Sphingolipids	Glycosphingolipids	Neutral glycosphingolipids	galactosylceramides	1	CSH ESI+	[M+H]+	C54H101NO13	MKOKWBRPIBQYJJ-LWQSSKHKSA-N	CCCCCCCCCCCCC/C=C/[C@H]([C@H](CO[C@H]1C([C@H]([C@@H]([C@H](O1)CO)O[C@H]2[C@@H]([C@H]([C@H]([C@H](O2)CO)O)O)O)O)O)NC(=O)CCCCCCCCCCCCC/C=C\CCCCCCCC)O	20057309	72.85587:4364 76.90926:4578 79.05432:16771 81.06996:28749 82.0652:42557 83.08553:20637 85.02855:21727 91.03905:4826 93.07001:21244 95.0856:40415 96.08049:4563 97.02852:8529 97.10108:10656 107.08588:15910 109.10139:8995 111.11687:5519 121.10101:21806 123.11679:4966 127.03856:5845 135.11697:16853 145.04984:6539 186.47452:5317 247.24191:6456 252.26871:260793 264.26886:2541491 266.28577:6548 271.0056…	354868	nd	9851	342156	nd	161962	nd	nd	nd	nd	12122	102964	nd	175320	13257	nd	nd	nd	nd	nd	nd	nd	4128	24354	nd	6451	nd	nd	21237	nd	nd	10008	nd
3169	204	569637	levoglucosan	Organoheterocyclic compounds	Oxepanes		Oxepanes	sugars	1	GCMS		C6H10O5	TWNIBLMWSKIRAT-VFUOTHLCSA-N	C1[C@@H]2[C@H]([C@@H]([C@H]([C@H](O1)O2)O)O)O	2724705	85:775.0 87:165.0 88:163.0 89:177.0 90:42.0 91:21.0 92:2.0 95:13.0 97:132.0 98:53.0 99:731.0 100:180.0 101:2830.0 102:212.0 103:5456.0 104:270.0 105:366.0 109:317.0 111:424.0 112:33.0 113:818.0 114:131.0 115:724.0 116:1575.0 117:3643.0 118:337.0 119:568.0 120:38.0 125:69.0 126:44.0 127:263.0 129:5991.0 130:703.0 131:1830.0 132:221.0 133:3867.0 134:297.0 135:293.0 136:48.0 139:2.0 140:20.0 141:67.…	1045	627	1317	2182	3243	2303	2250	466	3300	10830	715	888	2122	8481	10907	1621	2579	2065	1813	1672	3228	3115	1379	53534	2656	11029	850	1777	487	4130	913	1797	1681
LCA			Lithocholic acid	Lipids and lipid-like molecules	Steroids and steroid derivatives	Bile acids, alcohols and derivatives	Hydroxy bile acids, alcohols and derivatives	unconjugated bile acids	1	LC-MS/MS_BA		C24H40O3	SMEROWZSTRWXGI-HVATVPOCSA-N	C[C@H](CCC(=O)O)[C@H]1CC[C@@H]2[C@@]1(CC[C@H]3[C@H]2CC[C@H]4[C@@]3(CC[C@H](C4)O)C)C	9903	375.3 / 375.3	56	9361	nd	108	464	nd	325	443	835	1806	7357	nd	169	4469	9582	5511	1206	294	nd	1881	965	324	1597	364	580	114	852	1114	960	1319	nd	nd	nd
0.93_526.32	526.315	0.934	LPC 14:0	Lipids and lipid-like molecules	Glycerophospholipids	Glycerophosphocholines	Lysophosphatidylcholines	saturated_lysophosphatidylcholines	1	CSH ESI-	[M+CH3COO]-	C22H46NO7P	VXUOFDJKYGDUJI-OAQYLSRUSA-N	CCCCCCCCCCCCCC(=O)OC[C@H](COP(=O)([O-])OCC[N+](C)(C)C)O	460604	73.27287:2135 78.95776:9070 132.42062:2460 168.04225:2854 196.40582:35850 224.06923:24435 227.20129:270103 242.07916:9752 256.54077:2988 301.2168:3524 452.27875:146015	61627	nd	nd	1236158	nd	51134	nd	nd	nd	nd	nd	nd	nd	445646	55049	nd	nd	nd	nd	nd	nd	nd	235246	nd	nd	nd	nd	nd	nd	nd	nd	nd	nd
1.45_554.35	554.346	1.445	LPC 16:0	Lipids and lipid-like molecules	Glycerophospholipids	Glycerophosphocholines	Lysophosphatidylcholines	saturated_lysophosphatidylcholines	1	CSH ESI-	[M+CH3COO]-	C24H50NO7P	ASWBNKHCZGQVJV-HSZRJFAPSA-N	CCCCCCCCCCCCCCCC(=O)OC[C@H](COP(=O)([O-])OCC[N+](C)(C)C)O	460602	70.80236:16216 78.9577:70404 118.49455:12008 149.81189:12564 168.04169:29202 213.83691:13106 220.02853:13385 224.06912:251592 230.22728:12001 242.08054:20435 255.23285:2609071 291.465:14499 341.75037:13293 353.38565:12739 480.3096:1067976	6347700	18479	608302	63839506	nd	6777304	nd	nd	72870	6018	159236	90936	nd	24026712	2996449	5986	5587	3944	183554	nd	34896	nd	29118053	4798	nd	12747	5366	13251	41499	10384	210332	20178	nd
1.04_552.33	552.331	1.044	LPC 16:1	Lipids and lipid-like molecules	Glycerophospholipids	Glycerophosphocholines	Lysophosphatidylcholines	unsaturated_lysophosphatidylcholines	1	CSH ESI-	[M+CH3COO]-	C24H48NO7P	LFUDDCMNKWEORN-ZXEGGCGDSA-N	CCCCCC/C=C\CCCCCCCC(=O)OC[C@H](COP(=O)([O-])OCC[N+](C)(C)C)O	24779461	78.9577:47126 152.99487:19076 163.56163:3398 168.0421:25518 194.43527:3268 201.64003:4237 201.65846:7775 224.06883:124528 242.07939:25277 253.21709:1300332 327.23239:13643 478.29361:624515	66700	nd	nd	1802589	nd	75473	nd	nd	nd	nd	nd	nd	nd	596933	36446	nd	nd	nd	nd	nd	nd	nd	335490	nd	nd	nd	nd	nd	nd	nd	nd	nd	nd
1.80_568.36	568.362	1.803	LPC 17:0	Lipids and lipid-like molecules	Glycerophospholipids	Glycerophosphocholines	Lysophosphatidylcholines	saturated_lysophosphatidylcholines	1	CSH ESI-	[M+CH3COO]-	C25H52NO7P	SRRQPVVYXBTRQK-UHFFFAOYSA-N	O=C(OCC(O)COP(=O)([O-])OCC[N+](C)(C)C)CCCCCCCCCCCCCCCC	24779464	78.95782:5453 108.20051:2549 108.71591:2272 152.99419:2684 155.43904:2495 198.04805:9470 198.06886:10980 216.93118:2737 224.06897:24896 241.19127:2705 269.24857:289000 494.32516:131971	55944	nd	nd	678274	nd	51194	nd	nd	nd	nd	nd	nd	nd	193152	3892	nd	nd	nd	nd	nd	nd	nd	325320	nd	nd	nd	nd	nd	nd	nd	nd	nd	nd
2.23_582.38	582.378	2.227	LPC 18:0	Lipids and lipid-like molecules	Glycerophospholipids	Glycerophosphocholines	Lysophosphatidylcholines	saturated_lysophosphatidylcholines	1	CSH ESI-	[M+CH3COO]-	C26H54NO7P	IHNKQIMGVNPMTC-RUZDIDTESA-N	CCCCCCCCCCCCCCCCCC(=O)OC[C@H](COP(=O)([O-])OCC[N+](C)(C)C)O	497299	78.95776:136543 88.66531:9235 152.99435:67665 168.04182:79636 188.35196:10363 188.81665:9548 198.94276:63527 224.06898:408216 242.07922:72388 283.26416:4383624 283.78696:11286 493.46173:10416 508.34085:2198300	1274441	nd	70503	12921524	nd	1240786	nd	nd	nd	nd	16503	63884	nd	3656006	310867	nd	nd	nd	341756	nd	nd	nd	5719711	nd	nd	4068	nd	nd	nd	nd	63276	nd	nd
1.60_580.36	580.362	1.601	LPC 18:1	Lipids and lipid-like molecules	Glycerophospholipids	Glycerophosphocholines	Lysophosphatidylcholines	unsaturated_lysophosphatidylcholines	1	CSH ESI-	[M+CH3COO]-	C26H52NO7P	YAMUFBLWGFFICM-PTGWMXDISA-N	CCCCCCCC/C=C\CCCCCCCC(=O)OC[C@H](COP(=O)([O-])OCC[N+](C)(C)C)O	16081932	71.57285:2526 72.58288:2717 74.1757:3035 78.95776:21127 88.1129:3317 102.7465:3278 106.63688:2865 137.83878:3177 152.99501:6572 155.35423:3042 168.04247:7083 173.34749:3088 196.49806:9861 196.51978:31994 197.55841:2849 219.53156:3050 224.06941:55170 242.08047:4966 254.96278:3294 281.2486:606188 506.32529:284632 524.73566:3312	322634	nd	6738	6766258	nd	333003	nd	nd	nd	nd	nd	nd	nd	1984937	172640	nd	nd	nd	26223	nd	nd	nd	3029691	nd	nd	nd	nd	nd	nd	nd	31125	nd	nd
1.10_578.35	578.347	1.097	LPC 18:2	Lipids and lipid-like molecules	Glycerophospholipids	Glycerophosphocholines	Lysophosphatidylcholines	unsaturated_lysophosphatidylcholines	1	CSH ESI-	[M+CH3COO]-	C26H50NO7P	SPJFYYJXNPEZDW-FTJOPAKQSA-N	CCCCC/C=C\C/C=C\CCCCCCCC(=O)OC[C@H](COP(=O)([O-])OCC[N+](C)(C)C)O	11005824	78.95773:24368 101.44962:3096 108.6525:2562 113.90815:2669 128.05365:3065 136.05595:2431 145.0255:2450 145.66463:2789 152.99483:15687 168.04195:12720 224.06927:75997 236.55446:2901 242.07893:14353 279.23288:700017 312.94958:3359 504.30969:355200 553.97473:3016	8299	nd	nd	294616	nd	135041	nd	nd	nd	nd	nd	nd	nd	37062	47976	nd	nd	nd	nd	nd	nd	nd	47702	nd	nd	nd	nd	nd	nd	nd	7331	nd	nd
2.36_550.39	550.386	2.358	LPC 20:1	Lipids and lipid-like molecules	Glycerophospholipids	Glycerophosphocholines	Lysophosphatidylcholines	unsaturated_lysophosphatidylcholines	1	CSH ESI+	[M+H]+	C28H56NO7P	GJTDRNFWIDPARY-GTPZACKGSA-N	CCCCCCCCCC/C=C\CCCCCCCC(=O)OC[C@H](COP(=O)([O-])OCC[N+](C)(C)C)O	24779475	86.09657:26846 104.10712:138444 125.00037:16029 184.07355:190158 198.60515:17152 219.62468:2776 532.37726:15132 550.38562:67763	nd	nd	nd	464815	nd	nd	nd	nd	nd	nd	nd	nd	nd	108875	nd	nd	nd	nd	nd	nd	nd	nd	223915	nd	nd	nd	nd	nd	nd	nd	nd	nd	nd
1.78_606.38	606.378	1.776	LPC 20:2	Lipids and lipid-like molecules	Glycerophospholipids	Glycerophosphocholines	Lysophosphatidylcholines	unsaturated_lysophosphatidylcholines	1	CSH ESI-	[M+CH3COO]-	C28H54NO7P	YYQVCMMXPIJVHY-ZOIJLGJPSA-N	CCCCC/C=C\C/C=C\CCCCCCCCCC(=O)OC[C@H](COP(=O)([O-])OCC[N+](C)(C)C)O	52924053	78.82748:2492 78.95795:5628 79.69734:2852 84.18132:2304 99.72865:2369 149.4189:2540 168.04158:4032 181.73541:2574 203.20148:4586 224.06909:14725 307.2243:5978 307.2644:173316 496.27832:2815 532.34094:91819	nd	nd	nd	61476	nd	nd	nd	nd	nd	nd	nd	nd	nd	14455	nd	nd	nd	nd	nd	nd	nd	nd	5799	nd	nd	nd	nd	nd	nd	nd	nd	nd	nd
1.87_508.38	508.375	1.869	LPC O-18:1	Lipids and lipid-like molecules	Glycerophospholipids	Glycerophosphocholines	Monoalkylglycerophosphocholines	phospholipid ethers	1	CSH ESI+	[M+H]+	C26H54NO6P	HEEMBWYZIJABCR-ZXAYODBVSA-N	[C@](COP(=O)([O-])OCC[N+](C)(C)C)([H])(O)COCCCCCCCCCC/C=C\CCCCCC	21672239	73.46183:2411 77.75778:2352 81.03485:2631 83.08589:2684 86.0965:30737 101.31599:2684 104.107:237913 124.99985:17899 133.36526:2821 145.65247:2630 184.07307:43742 202.81371:5130 222.11906:2533 254.96414:2622 508.37534:84002	6980	nd	4742	625441	nd	nd	nd	nd	nd	nd	nd	nd	nd	267733	nd	nd	nd	nd	10904	nd	nd	nd	160173	nd	nd	nd	nd	nd	nd	nd	nd	nd	nd
1.16_438.26	438.262	1.163	LPE 15:0	Lipids and lipid-like molecules	Glycerophospholipids	Glycerophosphoethanolamines	Lysophosphatidylethanolamines	saturated_lysophospholipids	1	CSH ESI-	[M-H]-	C20H42NO7P	FGHPDPYCRTXYNZ-UHFFFAOYSA-N	O=C(OCC(O)COP(=O)(O)OCCN)CCCCCCCCCCCCCC		78.95776:19007 122.0939:2277 137.3707:2217 140.01071:5778 152.04285:2555 152.99463:2423 168.63655:2419 196.03748:51400 203.16182:5493 214.04785:9638 241.21715:498101 260.5795:2182 438.26282:107929	48081	117185	nd	5245	3740	4710	6704	320347	390167	nd	nd	241536	nd	658548	nd	104302	47733	15398	262705	401394	38147	188453	141982	49761	15865	1042416	nd	222105	nd	132225	nd	83051	108816
1.46_452.28	452.278	1.46	LPE 16:0	Lipids and lipid-like molecules	Glycerophospholipids	Glycerophosphoethanolamines	Lysophosphatidylethanolamines	saturated_lysophospholipids	1	CSH ESI-	[M-H]-	C21H44NO7P	CKPBBEOJHAPPBT-HXUWFJFHSA-N	CCCCCCCCCCCCCCCC(=O)O[C@H](CO)COP(=O)(O)OCCN	53480922	78.9577:43582 121.38301:2580 121.99957:2905 140.01079:34205 152.99535:9591 196.0372:118175 197.94153:16794 214.04848:17368 255.23285:1219780 452.27853:297330 452.35358:4380	699892	221856	21889	7021356	20748	326099	68273	537254	886321	26687	32742	385499	91700	1742573	9412	166377	184205	53516	296684	591430	168922	247727	1904046	245500	63507	447972	24200	208902	17107	443899	92553	144065	102283
1.20_476.28	476.278	1.199	LPE 18:2	Lipids and lipid-like molecules	Glycerophospholipids	Glycerophosphoethanolamines	Lysophosphatidylethanolamines	unsaturated_phosphatidylethanolamines	1	CSH ESI-	[M-H]-	C23H44NO7P	DBHKHNGBVGWQJE-USWSLJGRSA-N	CCCCC/C=C\C/C=C\CCCCCCCC(=O)OC[C@H](COP(=O)(O)OCCN)O	52925130	78.95779:2947 108.31058:2272 148.47821:2264 153.12093:2918 196.03723:15065 203.35246:4367 210.57774:2476 279.23279:144455 360.55386:2360 405.00604:2460 476.16263:3081 476.27695:36774	65817	7429	nd	1050069	nd	7605	nd	nd	8324	nd	nd	nd	nd	143331	nd	nd	nd	nd	nd	11181	nd	nd	270801	nd	nd	nd	nd	nd	nd	nd	9687	nd	nd
9.59_145.10	145.097	9.585	Lysine	Organic acids and derivatives	Carboxylic acids and derivatives	Amino acids, peptides, and analogues	Amino acids and derivatives	amino acids, basic	1	HILIC ESI-	[M-H]-	C6H14N2O2	KDXKERNSBIXSRK-YFKPBYRVSA-N	C(CCN)C[C@@H](C(=O)O)N	5962	52.51242:2015 55.74148:1857 56.15898:1989 92.07931:1964 108.77538:1872 145.09714:28156	937311	724706	1217289	1090453	62983	1106086	129260	154417	503149	88875	618121	500753	1167045	933902	2646657	2211223	344938	886907	1207936	1908580	353456	268872	2409103	529305	1658804	291547	1022461	6703280	6001141	7481838	250549	233373	161970
85112	217	541086	lyxose	Organic oxygen compounds	Organooxygen compounds	Carbohydrates and carbohydrate conjugates	Monosaccharides	sugars	1	GCMS		C5H10O5	SRBFZHDQGSBBOR-AGQMPKSLSA-N	C1[C@H]([C@@H]([C@@H](C(O1)O)O)O)O	439240	85:155.0 87:455.0 88:330.0 89:5647.0 90:390.0 94:48.0 96:79.0 99:377.0 100:2717.0 101:1492.0 102:600.0 103:35832.0 104:3052.0 105:1929.0 106:120.0 107:53.0 109:17.0 110:80.0 111:85.0 112:138.0 113:332.0 114:254.0 115:274.0 116:415.0 117:4160.0 118:270.0 119:534.0 121:96.0 126:187.0 127:203.0 128:129.0 129:3451.0 130:540.0 131:1760.0 133:4326.0 134:544.0 135:414.0 138:29.0 139:23.0 142:121.0 143:6…	24047	34788	5714	14219	3406	17023	5807	2267	3165	2897	101265	18381	5096	7408	5382	3191	1913	3409	4087	2620	2665	3261	29180	3495	3795	6436	6246	5508	4399	2798	2468	3390	3436
1391	233	463180	malic acid	Organic acids and derivatives	Hydroxy acids and derivatives	Beta hydroxy acids and derivatives	Beta hydroxy acids and derivatives	dicarboxylic acids	1	GCMS		C4H6O5	BJEPYKJPYRNKOW-UHFFFAOYSA-N	C(C(C(=O)O)O)C(=O)O	525	85:66.0 87:316.0 88:106.0 89:148.0 90:42.0 95:37.0 99:129.0 101:4462.0 102:488.0 103:641.0 104:93.0 105:294.0 115:533.0 116:432.0 117:2305.0 118:259.0 119:501.0 120:70.0 121:62.0 124:21.0 129:385.0 131:1945.0 132:129.0 133:6850.0 134:1075.0 135:667.0 136:51.0 137:33.0 139:20.0 142:41.0 143:745.0 144:107.0 145:145.0 147:21089.0 148:2969.0 149:2528.0 150:99.0 151:286.0 153:24.0 158:12.0 159:29.0 16…	6088	6206	7530	9563	44382	4116	44966	8632	10305	11489	35616	375	6090	3350	10726	7093	5013	5560	2536	3442	4615	4981	2150	15257	12649	7752	6551	8151	1722	2795	14348	2027	5758
16918	233	305372	malonic acid	Organic acids and derivatives	Carboxylic acids and derivatives	Dicarboxylic acids and derivatives	Dicarboxylic acids and derivatives	malonates	1	GCMS		C3H4O4	OFOBLEOULBTSOW-UHFFFAOYSA-N	C(C(=O)O)C(=O)O	867	85:1026.0 86:1326.0 87:4220.0 88:2045.0 89:1145.0 90:185.0 91:256.0 93:120.0 94:177.0 95:78.0 96:135.0 97:304.0 98:370.0 99:12693.0 100:1810.0 101:5145.0 102:1329.0 103:2418.0 104:448.0 105:1540.0 107:59.0 108:167.0 109:3011.0 110:122.0 111:448.0 113:89.0 114:57.0 115:3728.0 116:2072.0 117:4257.0 118:696.0 119:863.0 120:61.0 122:131.0 124:104.0 126:90.0 127:206.0 130:370.0 131:7673.0 132:1197.0 1…	256	133	382	425	618	213	3645	255	123	570	152	128	344	376	150	377	454	262	193	258	474	397	108	396	262	94	413	110	1527	239	52	105	358
1979	204	946601	maltose	Organic oxygen compounds	Organooxygen compounds	Carbohydrates and carbohydrate conjugates	Glycosyl compounds	sugars	1	GCMS		C12H22O11	GUBGYTABKSRVRQ-PICCSMPSSA-N	C([C@@H]1[C@H]([C@@H]([C@H]([C@H](O1)O[C@@H]2[C@H](OC([C@@H]([C@H]2O)O)O)CO)O)O)O)O	439186	85:18.0 86:40.0 87:38.0 89:640.0 90:50.0 94:3.0 95:51.0 96:226.0 97:52.0 98:60.0 99:10.0 100:262.0 101:31.0 102:157.0 103:2571.0 104:171.0 105:231.0 108:7.0 109:86.0 111:17.0 112:13.0 113:130.0 114:62.0 116:82.0 117:1560.0 118:98.0 119:98.0 125:5.0 127:10.0 128:39.0 129:1849.0 130:331.0 131:223.0 132:24.0 133:813.0 134:81.0 140:25.0 141:77.0 142:107.0 143:428.0 145:58.0 147:3256.0 148:427.0 149:3…	36705	80231	132326	24222	13512	91246	31670	44859	1078	70035	70448	34235	60022	66598	38302	12360	159030	151906	16024	45449	165343	64161	36835	76580	62172	20560	106365	60493	15988	29748	719498	15397	25949
17883	319	663215	mannitol	Organic oxygen compounds	Organooxygen compounds	Carbohydrates and carbohydrate conjugates	Sugar alcohols	sugar alcohols	1	GCMS		C6H14O6	FBPFZTCFMRRESA-KVTDHHQDSA-N	C([C@H]([C@H]([C@@H]([C@@H](CO)O)O)O)O)O	6251	85:280.0 86:2716.0 87:721.0 88:266.0 89:1849.0 91:31.0 95:7.0 97:242.0 98:55.0 99:127.0 100:1461.0 101:1171.0 102:291.0 103:12462.0 104:1201.0 105:191.0 107:139.0 110:19.0 111:65.0 113:144.0 117:8049.0 118:875.0 119:270.0 126:61.0 129:5251.0 130:900.0 131:1576.0 132:222.0 133:2932.0 134:10.0 135:38.0 139:22.0 141:117.0 143:628.0 144:294.0 145:408.0 147:17101.0 148:2774.0 149:1503.0 150:187.0 151:…	55195	5248	21380	31244	934	220277	2705	9680	8018	1430	856138	2547	4327	25184	1087374	14132	3982	4883	13639	9811	2099	2412	234845	2913	9687	24055	3288	3859	16160	8554	6055	2232	12854
4730	361	988497	melibiose	Organic oxygen compounds	Organooxygen compounds	Carbohydrates and carbohydrate conjugates	Glycosyl compounds	sugars	1	GCMS		C12H22O11	DLRVVLDZNNYCBX-ABXHMFFYSA-N	C([C@@H]1[C@@H]([C@@H]([C@H]([C@H](O1)OC[C@@H]2[C@H]([C@@H]([C@H](C(O2)O)O)O)O)O)O)O)O	440658	87:30.0 88:14.0 89:775.0 90:43.0 96:163.0 99:91.0 100:296.0 101:841.0 102:257.0 103:3880.0 104:223.0 105:205.0 109:146.0 113:136.0 114:48.0 116:215.0 117:1162.0 118:29.0 125:3.0 129:2842.0 130:613.0 131:483.0 133:1258.0 134:133.0 135:18.0 137:14.0 138:29.0 139:3.0 140:57.0 141:70.0 142:53.0 143:226.0 145:162.0 147:3683.0 148:373.0 149:291.0 150:67.0 153:61.0 154:4.0 155:526.0 156:117.0 157:540.0 …	599	2672	402	603	1640	1508	936	193	200	377	585	1181	305	753	430	1433	164	206	164	187	327	186	177	291	248	379	316	176	463	170	214	665	184
5393	241	289520	methanolphosphate	Organic acids and derivatives	Organic phosphoric acids and derivatives	Phosphate esters	Alkyl phosphates	organophosphates	1	GCMS		CH5O4P	CAAULPUQFIIOTL-UHFFFAOYSA-N	COP(=O)(O)O	13130	91:189.0 98:118.0 99:213.0 109:13.0 110:42.0 115:116.0 117:125.0 118:94.0 119:81.0 121:107.0 122:6.0 123:105.0 130:13.0 133:646.0 134:53.0 135:408.0 136:125.0 137:176.0 143:34.0 144:4.0 151:78.0 158:18.0 160:2.0 163:856.0 164:67.0 165:58.0 167:92.0 168:16.0 181:147.0 184:128.0 195:233.0 198:4.0 210:1.0 211:438.0 212:72.0 213:19.0 225:3.0 228:46.0 239:1.0 241:2338.0 242:433.0 243:249.0 244:9.0 256…	220	98	497	2028	1334	117	1247	132	449	409	1415	125	425	1218	8438	261	535	1968	679	190	511	349	6037	16822	357	200	597	274	469	318	67	124	345
7.45_148.04	148.043	7.45	Methionine	Organic acids and derivatives	Carboxylic acids and derivatives	Amino acids, peptides, and analogues	Amino acids and derivatives	amino acids, sulfur	1	HILIC ESI-	[M-H]-	C5H11NO2S	FFEARJCKVFRZRR-BYPYZUCNSA-N	CSCC[C@@H](C(=O)[O-])[NH3+]	6137	58.28706:1778 60.68065:1933 80.32352:1813 101.82515:2283	245226	714000	205936	191117	7303	715523	82440	555150	977305	39891	30045	292284	240493	253534	395276	375581	235482	292703	286079	558964	153403	44905	229115	926172	1008143	359395	1157888	76677	566212	623264	126841	441094	81688
8.58_164.04	164.038	8.583	Methioninesulfoxide	Organic acids and derivatives	Carboxylic acids and derivatives	Amino acids, peptides, and analogues	Amino acids and derivatives	amino acids, sulfur	1	HILIC ESI-	[M-H]-	C5H11NO3S	QEFRNWWLZKMPFJ-YGVKFDHGSA-N	CS(=O)CC[C@@H](C(=O)O)N	1548907	60.97399:105903 62.98951:9870 63.96115:482889 64.96869:5831 65.0321:5847 65.56099:5604 66.21354:5107 66.34748:5496 69.12911:5779 71.14767:5402 72.00776:115703 76.96902:487774 77.97675:45677 78.98485:22676 79.9561:480697 80.96393:46657 100.0392:617436 101.04183:6494 117.82223:5759 130.54684:5590 149.01454:87617 164.03792:563309	1344055	748996	340278	404580	8606	1301657	145831	300466	400579	72367	2490641	363585	323958	211281	467061	204263	162625	179140	249466	700061	320430	45377	3286048	341131	966652	413588	1917566	494084	1081370	1216138	57341	359977	172907
14758	204	630836	methyl O-D-galactopyranoside	Organic oxygen compounds	Organooxygen compounds	Carbohydrates and carbohydrate conjugates	Glycosyl compounds	sugars	1	GCMS		C7H14O6	HOVAGTYPODGVJG-VOQCIKJUSA-N	CO[C@H]1[C@@H]([C@H]([C@H]([C@H](O1)CO)O)O)O	94214	85:74.0 86:12.0 87:134.0 88:68.0 89:1655.0 90:104.0 91:27.0 95:3.0 96:6.0 97:2.0 98:9.0 99:77.0 100:29.0 101:396.0 102:59.0 103:3447.0 104:316.0 105:190.0 106:20.0 109:22.0 110:4.0 111:63.0 112:10.0 113:65.0 114:78.0 115:69.0 116:268.0 117:709.0 118:65.0 119:148.0 121:10.0 125:7.0 126:38.0 127:54.0 128:13.0 129:1102.0 130:73.0 131:445.0 132:68.0 133:2743.0 134:271.0 135:128.0 136:16.0 138:1.0 139…	19723	21262	11507	20210	9711	25253	19920	11102	10932	842	44744	13610	4636	17728	22125	5668	902	1534	26921	7934	1547	11038	4825	3934	8457	54991	1762	2759	31625	1780	416	20681	9991
1.66_183.03	183.029	1.655	Methylgallate	Benzenoids	Benzene and substituted derivatives	Benzoic acids and derivatives	Hydroxybenzoic acid derivatives	phenolic natural products	1	HILIC ESI-	[M-H]-	C8H8O5	FBSFWRHWHYMIOG-UHFFFAOYSA-N	COC(=O)C1=CC(=C(C(=C1)O)O)O	7428	68.99404:2460 69.3307:1820 96.95866:13466 98.37703:1955 111.00755:2759 112.98448:3138 124.01543:13871 139.00386:2706 139.0757:2203 140.01015:2109 153.11038:2180 156.02003:2599 168.00584:20635 183.0293:264164	7097	15464	11684	10767	10946	15094	6393	17303	19161	7285	12975	42032	297388	14849	12697	6827	12674	8482	317308	803129	1877435	1071116	47621	32947	60395	71032	2104975	23653	61303	155073	22555	30269	67458
6426	333	709842	mucic acid	Organic oxygen compounds	Organooxygen compounds	Carbohydrates and carbohydrate conjugates	Sugar acids and derivatives	sugar acids	1	GCMS		C6H10O8	DSLZVSRJTYRBFB-DUHBMQHGSA-N	[C@@H]([C@@H]([C@H](C(=O)O)O)O)([C@@H](C(=O)O)O)O	3037582	85:27.0 88:2.0 89:28.0 90:101.0 93:21.0 95:66.0 99:171.0 101:153.0 102:448.0 103:1679.0 104:125.0 105:13.0 106:2.0 107:23.0 110:36.0 111:100.0 115:17.0 117:651.0 118:112.0 121:8.0 124:1.0 128:77.0 129:1082.0 130:312.0 131:424.0 133:1205.0 134:12.0 135:82.0 136:4.0 137:3.0 139:2.0 140:41.0 141:17.0 142:106.0 143:1480.0 144:111.0 145:32.0 146:17.0 147:6387.0 148:679.0 149:640.0 150:1.0 152:3.0 153:…	18248	225	2745	5875	576	61630	1398	1823	153	393	4265	91	374	3654	656	1378	180	214	349	257	234	237	465	175	378	163	233	1515	336	108	100	142	319
8.97_203.15	203.15	8.967	N,N-Dimethylarginine (ADMA & SDMA)	Organic acids and derivatives	Carboxylic acids and derivatives	Amino acids, peptides, and analogues	Amino acids and derivatives	methylated amino acid	1	HILIC ESI+	[M+H]+	C8H18N4O2	NWGZOALPWZDXNG-UHFFFAOYSA-N	CN(C)C(CCCN=C(N)N)C(=O)O	17801140	54.48557:2014 55.7911:2145 69.03355:2705 70.06528:146053 71.06052:37933 72.0808:23405 88.08706:153810 97.02853:33189 114.10223:3077 115.08671:27576 116.07077:216100 120.6028:2252 126.1026:3092 127.03883:2259 128.06999:2314 132.06541:10803 133.09712:28674 133.26735:2430 147.37988:2082 148.59918:2194 158.09276:35292 158.12888:113632 161.58083:1975 172.10799:44084 185.14005:2464 202.65375:3341 203.1…	4989907	4304968	1449060	3925162	1089877	7320441	1024178	4599901	6965624	964935	2790466	5510473	2625905	4174246	11396758	3030043	5532034	6266558	5386694	5545478	3280083	4133350	7821131	9764854	8042468	10146367	1065829	4248110	4569369	8119383	1411803	7303929	3263775
5.59_312.13	312.13	5.589	N2,N2-Dimethylguanosine	Nucleosides, nucleotides, and analogues	Purine nucleosides		Purine nucleosides	nucleoside metabolite	1	HILIC ESI+	[M+H]+	C12H17N5O5	RSPURTUNRHNVGF-IOSLPCCCSA-N	CN(C)C1=NC(=O)C2=C(N1)N(C=N2)[C@H]3[C@@H]([C@@H]([C@H](O3)CO)O)O	92919	60.68415:2114 72.8782:2434 81.30129:2234 84.01311:2097 180.08789:1431530 232.09856:2928 295.12885:10104 312.13052:10146 312.32565:4648	1664005	21021	605828	755963	nd	2612856	nd	nd	nd	nd	1234228	5175	nd	1215635	870935	38680	nd	8880	195935	nd	nd	nd	714212	nd	nd	439255	nd	nd	224572	nd	304494	52219	nd
8.83_188.18	188.175	8.828	N8-Acetylspermidine	Organic acids and derivatives	Carboximidic acids and derivatives	Carboximidic acids	Carboximidic acids	biogenic polyamines	1	HILIC ESI+	[M+H]+	C9H21N3O	FONIWJIDLJEJTL-UHFFFAOYSA-N	CC(=O)NCCCCNCCCN	123689	52.14293:1741 58.06529:4512 72.08084:149715 100.07571:133972 112.1118:4421 114.09121:15713 117.10233:23938 145.56734:1945 171.14911:93587 188.10631:7553 188.17569:128051	4636618	15204532	6592376	4375452	13423337	5315030	7290633	15858392	10151067	1563785	880156	21855915	9045927	5029569	7767019	23951014	14640392	9462076	7980712	16700325	8575399	13775752	13950600	26164974	13029912	12542605	13917529	1683719	8364976	18666884	12428766	17312318	19742868
1.46_219.11	219.113	1.457	N-Acetyl-5-hydroxytryptamine	Organoheterocyclic compounds	Indoles and derivatives	Hydroxyindoles	Hydroxyindoles	tryptamines	1	HILIC ESI+	[M+H]+	C12H14N2O2	MVAWJSIDNICKHF-UHFFFAOYSA-N	CC(=O)NCCC1=CNC2=C1C=C(C=C2)O	903	53.03899:13432 77.03869:3064 94.161:2325 95.04917:33644 102.01635:2081 105.04483:14358 141.00035:54549 159.07698:3921 159.09155:84180 159.11578:4782 160.0755:101932 162.67932:2057 177.10216:57042 183.1176:3515 197.728:13953 201.10248:26455 201.12563:4149 219.04724:56034 219.11356:28555 219.13896:9526 219.17426:4527	5343	25854	9442	12033	49180	nd	25506	10488	nd	nd	nd	93305	1261641	nd	nd	nd	3278	nd	11098	15906	20598	14213	3932	40015	26253	41571	79423	nd	8947	nd	19155	14115	13640
7.76_174.04	174.04	7.756	N-Acetylaspartic acid	Organic acids and derivatives	Carboxylic acids and derivatives	Amino acids, peptides, and analogues	Amino acids and derivatives	acetylated amino acids	1	HILIC ESI-	[M-H]-	C6H9NO5	OTCCIMWXFLJLIA-BYPYZUCNSA-N	CC(=O)N[C@@H](CC(=O)O)C(=O)O	65065	58.02848:19048 59.01244:17419 59.74993:1899 71.01278:2945 73.02828:12429 73.16776:2194 74.0234:2242 82.3283:2069 88.03914:82419 95.04935:2701 106.76352:1630 112.03931:2683 114.01844:15080 115.00278:11426 130.04997:35927 138.43985:2076 156.03009:4172 174.04027:28406	2645	nd	1381	nd	1982	47390	11539	1579	nd	570	2540	3731	58777	948	2236	19286	27515	42846	1101	1941	2088	562	6839	631	3165	3337	2431	24421	2020	1728	nd	nd	nd
8.18_303.08	303.083	8.179	N-Acetylaspartylglutamic acid	Organic acids and derivatives	Carboxylic acids and derivatives	Amino acids, peptides, and analogues	Peptides	di-peptides	1	HILIC ESI-	[M-H]-	C11H16N2O8	OPVPGKGADVGKTG-BQBZGAKWSA-N	CC(=O)N[C@@H](CC(=O)O)C(=O)N[C@@H](CCC(=O)O)C(=O)O	188803	58.02843:150200 61.98699:6094 70.02852:4465 78.55771:2232 81.37788:2449 83.79946:2615 84.04403:24223 85.02819:4225 96.00778:780616 96.99183:44610 98.18438:2350 102.05473:59452 112.03938:15062 113.03413:4428 127.0495:3484 128.03409:1173785 129.01782:24617 129.10231:4218 130.08662:4043 137.24443:2394 138.05453:9693 146.04471:326890 155.04515:213951 156.02914:19338 168.90659:2593 182.045:234722 200.…	69574	4167	886	21609	nd	266811	12463	102245	593	nd	141060	142764	nd	46968	3891	1569	3264	75468	17353	782	643	23044	1806	nd	632	869	1070	8081	nd	nd	13394	1906	10921
1674	319	746341	n-acetyl-d-hexosamine	Organic oxygen compounds	Organooxygen compounds	Carbohydrates and carbohydrate conjugates	Aminosaccharides	hexosamines	1	GCMS		C8H15NO6	OVRNDRQMDRJTHS-FMDGEEDCSA-N	CC(=O)N[C@@H]1[C@H]([C@@H]([C@H](O[C@H]1O)CO)O)O	24139	85:448.0 86:230.0 88:655.0 89:9641.0 90:778.0 99:345.0 100:2544.0 101:2131.0 102:964.0 103:45456.0 104:4561.0 105:1970.0 106:10.0 113:655.0 114:2492.0 115:766.0 116:104.0 117:11596.0 118:1129.0 119:1434.0 126:279.0 127:100.0 128:346.0 129:15183.0 130:2624.0 131:3200.0 133:18066.0 134:1988.0 135:689.0 140:72.0 141:221.0 142:588.0 143:1887.0 144:357.0 146:152.0 147:49213.0 148:7660.0 149:5097.0 150…	1014	1427	1177	1273	516	2081	2565	2031	1638	333	2729	1176	1116	1548	541	1803	1589	1507	1833	2313	2171	2788	562	576	3254	2696	510	965	724	931	283	3108	1360
7.76_188.06	188.056	7.763	N-Acetylglutamic acid	Organic acids and derivatives	Carboxylic acids and derivatives	Amino acids, peptides, and analogues	Amino acids and derivatives	acetylated amino acid	1	HILIC ESI-	[M-H]-	C7H11NO5	RFMMMVDNIPUKGG-YFKPBYRVSA-N	CC(=O)N[C@@H](CCC(=O)O)C(=O)O	70914	58.02856:10193 59.01254:48486 72.04379:2267 74.21098:1793 76.23507:1885 77.90825:2084 88.03922:9516 95.05833:1980 100.07563:22256 102.05482:86449 110.29019:2136 126.05516:10902 127.03858:3506 128.03423:113746 130.08672:1928 144.06557:55911 144.12224:3626 146.04506:12852 160.89328:2309 170.04541:32570 171.02881:3206 182.55235:2145 188.05539:56552 188.07147:2595 188.11153:9667	11075	25622	nd	nd	1700	39701	12920	17604	19793	1269	4137	24133	14556	1591	1530	2990	4008	19724	13863	28036	23221	17607	13513	1990	40731	20409	25935	23479	1764	16248	nd	25026	6152
8.14_196.07	196.072	8.14	N-Acetylhistidine	Organic acids and derivatives	Carboxylic acids and derivatives	Amino acids, peptides, and analogues	Amino acids and derivatives	acetylated amino acid	1	HILIC ESI-	[M-H]-	C8H11N3O3	KBOJOGQFRVVWBH-ZETCQYMHSA-N	CC(=O)N[C@@H](CC1=CN=CN1)C(=O)O	51669405	50.28276:1989 56.73585:1843 57.72832:2005 59.01259:10745 67.02898:2781 76.08382:2308 81.04495:2116 110.07128:88094 112.13683:1788 132.05559:2704 134.07141:10498 152.08191:3765 154.06126:62713 195.90541:2999 196.01424:2876 196.05598:2856 196.0728:50694	246717	232059	41965	58895	12087	1552575	39197	450433	534453	7430	89884	157474	217541	109095	333807	131334	53195	188949	130230	292237	265976	222902	104245	571794	640149	238352	329702	10376	503742	273077	36174	218402	458560
7.05_220.08	220.082	7.055	N-Acetylmannosamine	Organic oxygen compounds	Organooxygen compounds	Carbohydrates and carbohydrate conjugates	Aminosaccharides	hexosamines	1	HILIC ESI-	[M-H]-	C8H15NO6	OVRNDRQMDRJTHS-ZTVVOAFPSA-N	CC(=O)N[C@H]1[C@H]([C@@H]([C@H](OC1O)CO)O)O	439281	58.02835:1889 58.03328:1956 59.01247:110939 68.50503:1928 69.51979:2091 71.01257:18267 71.74187:2065 73.56189:2162 79.08046:2026 82.02797:1947 82.58958:2112 89.0228:10538 97.75835:1920 100.03915:46735 101.02303:23007 118.82738:1734 119.03386:4512 120.89841:1716 126.74312:2085 142.93497:2460 151.9734:2098 153.7504:2059 176.04507:3587 177.53612:2012 189.88766:1955 199.7516:5739 199.76968:2881 203.1…	20914	2781335	1245	1207	1397	21420	77434	15010	124631	448	nd	1773615	133263	766	40270	11190	1139	563	422705	429749	18976	22479	636695	29274	834933	1103358	29546	22675	751795	26664	62390	769949	553951
3.19_190.05	190.053	3.188	N-acetyl-methionine	Organic acids and derivatives	Carboxylic acids and derivatives	Amino acids, peptides, and analogues	Amino acids and derivatives	acetylated amino acids	1	HILIC ESI-	[M-H]-	C7H13NO3S	XUYPXLNMDZIRQH-UHFFFAOYSA-N	CC(=O)NC(CCSC)C(=O)O	6180	50.39772:2425 52.07637:2095 57.42568:1983 61.66148:2139 70.02826:4490 71.04903:3245 84.0387:4023 84.04414:85225 98.05984:112795 98.45206:2166 100.03896:11925 102.94691:2013 103.24834:2062 112.03916:59395 114.01888:2145 142.04987:456012 143.05351:2748 143.86426:9304 146.06349:5228 148.04271:578838 149.04558:2644 151.13086:2273 170.79947:2687 190.05368:331121	910873	297246	365392	612591	106635	1828559	48109	1331914	1295584	166486	72974	294571	207192	925595	716445	771447	1173171	1024191	543812	772100	590376	169697	581447	462991	1452739	398042	2107113	99991	2675574	2835707	102630	215165	226902
9.40_308.10	308.099	9.399	N-Acetylneuraminic acid	Organic oxygen compounds	Organooxygen compounds	Carbohydrates and carbohydrate conjugates	Sugar acids and derivatives	sialic acids	1	HILIC ESI-	[M-H]-	C11H19NO9	SQVRNKJHWKZAKO-LUWBGTNYSA-N	CC(=O)N[C@@H]1[C@H](CC(O[C@H]1[C@@H]([C@@H](CO)O)O)(C(=O)O)O)O	439197	59.01252:40457 65.25725:2818 71.01243:11043 71.04895:5212 87.00745:2333050 89.0232:17897 90.00106:3196 96.04437:5809 98.05987:222236 100.03912:39040 101.02309:49780 114.70013:3100 119.03382:82925 119.04298:4512 126.05484:41350 128.03453:21192 142.05006:4787 146.0448:69776 148.19872:2919 170.04498:409024 200.05521:7520 201.07065:3885 218.06703:13507 220.08095:10197 290.08887:12687 308.09854:90105 …	121975	546107	25587	61145	1114	308122	18414	3039	539	315	40068	183759	4002	85176	52675	271	651	5255	6935	4794	11913	2021	128751	5333	26954	424711	7186	43680	37961	1740	229416	376508	2181
2.60_208.10	208.096	2.598	N-Acetylphenylalanine	Organic acids and derivatives	Carboxylic acids and derivatives	Amino acids, peptides, and analogues	Amino acids and derivatives	di-peptides	1	HILIC ESI+	[M+H]+	C11H13NO3	CBQJSKKFNMDLON-JTQLQIEISA-N	CC(=O)N[C@@H](CC1=CC=CC=C1)C(=O)O	74839	54.66369:2220 57.25679:1986 64.69309:2528 67.85956:1915 73.21402:1982 79.09904:1936 85.56713:1843 99.04363:2295 105.07021:2816 120.0808:325964 124.08681:2779 131.04845:4535 147.32967:2224 149.05942:7976 149.07132:8202 150.06599:15462 162.09117:80517 165.1147:2613 166.08574:117613 167.08189:3013 180.10201:3771 190.08577:14657 208.06088:8419 208.09488:57556 208.13013:26949 208.1692:21471	76712	154824	15129	9793	301650	186202	47086	141998	236226	64745	34351	138333	97575	17412	12019	37991	39586	34433	89243	215139	208633	150295	22374	772131	208458	239143	332722	25746	118842	114313	nd	209160	146366
87301	174	595523	N-acetylputrescine	Organic acids and derivatives	Carboximidic acids and derivatives	Carboximidic acids	Carboximidic acids	biogenic polyamines	1	GCMS		C6H14N2O	KLZGKIDSEJWEDW-UHFFFAOYSA-N	CC(=O)NCCCCN	122356	85:3862.0 86:56152.0 87:6678.0 88:3311.0 89:518.0 90:72.0 93:1.0 94:49.0 95:146.0 96:2586.0 97:481.0 98:2104.0 99:2411.0 100:32618.0 101:5452.0 102:5394.0 103:1640.0 104:582.0 105:212.0 109:26.0 110:423.0 111:415.0 112:6397.0 113:2161.0 114:2504.0 115:2578.0 116:5494.0 117:3889.0 118:1034.0 119:497.0 120:23.0 122:1872.0 123:114.0 124:123.0 125:23.0 126:826.0 127:360.0 128:3154.0 129:1963.0 130:96…	1846	1793	11411	1908	8480	4172	6106	3572	26073	22123	2661	4534	13123	9327	15556	2428	2613	2868	5956	8542	5800	12076	4205	13729	9573	1611	4840	40996	74366	8524	696	3941	1557
2.85_247.11	247.107	2.848	N-Acetyltryptophan	Organic acids and derivatives	Carboxylic acids and derivatives	Amino acids, peptides, and analogues	Amino acids and derivatives	acetylated amino acids	1	HILIC ESI+	[M+H]+	C13H14N2O3	DZTHIGRZJZPRDV-GFCCVEGCSA-N	CC(=O)N[C@H](CC1=CNC2=CC=CC=C21)C(=O)O	439917	51.89756:1894 79.70583:2185 88.03927:3315 89.33413:2142 90.11895:2057 104.45167:2116 118.06505:2659 118.09517:2314 130.06503:70168 132.0807:10511 142.06563:2117 142.2962:2523 144.0802:4442 146.06017:40433 159.09164:206949 160.0753:4422 170.06001:21351 174.0903:2762 183.09251:5025 184.07536:9089 187.08662:38060 188.07054:260482 198.71086:8465 201.10226:185910 205.09708:51781 211.13692:2181 229.073…	117984	98998	4561	7711	47156	136595	43281	179862	275900	201289	22563	148123	81619	74507	87358	247351	180442	240034	86479	208095	226457	192416	89139	156234	266219	332807	253476	36676	112937	120091	nd	229730	303958
8.09_189.12	189.123	8.09	N-epsilon-Acetyllysine	Organic acids and derivatives	Carboxylic acids and derivatives	Amino acids, peptides, and analogues	Amino acids and derivatives	acetylated amino acids	1	HILIC ESI+	[M+H]+	C8H16N2O3	DTERQYGMUDWYAZ-ZETCQYMHSA-N	CC(=O)NCCCC[C@@H](C(=O)O)N	6991978	84.08083:44881 126.08068:3592 126.09139:111757 130.08652:3108 143.11807:10109 145.82831:2004 189.12274:13447	138224	553981	55282	92591	149152	215449	119769	498342	520590	195629	197885	455605	324364	180900	269930	219872	214359	199425	384785	1259795	797106	492785	686061	952110	956924	422797	817965	168206	378500	500570	118091	266792	330199
1.70_123.05	123.055	1.7	Nicotinamide	Organoheterocyclic compounds	Pyridines and derivatives	Pyridinecarboxylic acids and derivatives	Pyridinecarboxamides	nicotinic acids	1	HILIC ESI+	[M+H]+	C6H6N2O	DFPAKSUCGFBDDF-UHFFFAOYSA-N	C1=CC(=CN=C1)C(=O)N	936	52.40434:2997 63.70827:3345 75.38628:3115 78.03385:12692 80.04945:397260 83.55498:3066 87.93937:3271 96.03805:5751 96.0444:113896 106.02862:33665 106.60911:3038 123.0552:1649737 123.09985:57768	941896	490235	729051	1507233	522594	1284499	725431	627025	681417	544538	692459	1441800	692042	2823127	970222	1318451	673433	360647	727721	613134	671090	473940	384356	193276	331134	624058	428897	415863	1289388	369935	7156174	5970132	2962972
2.81_158.08	158.081	2.812	N-Isovalerylglycine	Organic acids and derivatives	Carboxylic acids and derivatives	Amino acids, peptides, and analogues	Amino acids and derivatives	di-peptides	1	HILIC ESI-	[M-H]-	C7H13NO3	ZRQXMKMBBMNNQC-UHFFFAOYSA-N	CC(C)CC(=O)NCC(=O)O	546304	57.34363:1912 74.02343:715322 75.02685:2508 75.80005:2037 87.56828:1911 89.90134:1961 97.06491:2202 99.92449:24823 100.76328:1856 114.05475:2764 114.09127:60975 114.93293:3810 115.07491:2075 115.91927:8074 116.07033:9419 116.92708:4412 123.90051:3525 130.01601:4645 154.45985:2017 158.08128:135337	106193	120355	24457	41249	37930	420435	37704	317342	608394	38128	100084	128471	92967	46760	484807	136440	121742	148723	174645	270113	206329	200940	94792	515062	282182	158924	217301	46138	163748	322338	37458	88657	188663
8.39_162.08	162.076	8.394	N-Methylglutamic acid	Organic acids and derivatives	Carboxylic acids and derivatives	Amino acids, peptides, and analogues	Amino acids and derivatives	methylated amino acid	1	HILIC ESI+	[M+H]+	C6H11NO4	XLBVNMSMFQMKEY-UHFFFAOYSA-N	CNC(CCC(=O)O)C(=O)O	268779	56.05009:2979 56.20301:2652 60.04467:5699 60.08106:13461 60.10016:2376 64.05481:2209 69.03368:6283 70.06518:22195 71.60199:2782 72.04429:22198 74.06027:4150 76.03947:12449 80.04942:3842 84.04434:24199 85.02859:42215 87.04417:103843 88.03923:2502 90.055:6398 91.05833:4623 96.04443:26252 97.0285:50849 98.06011:783085 101.33809:2284 102.0548:5042 103.03928:21122 111.21005:3393 115.03912:16550 116.07…	191255	493436	62912	134370	85001	448366	85107	164954	113374	44056	124287	506902	146276	93033	70116	153087	150671	129758	203365	516858	406676	354431	324887	100061	322626	601811	200137	131938	148212	281509	630765	266787	178200
9.34_161.13	161.128	9.342	N-Methyllysine	Organic acids and derivatives	Carboxylic acids and derivatives	Amino acids, peptides, and analogues	Amino acids and derivatives	methylated amino acid	1	HILIC ESI+	[M+H]+	C7H16N2O2	PQNASZJZHFPQLE-UHFFFAOYSA-N	CNCCCCC(C(=O)O)N	541646	50.68369:1977 70.06525:271401 72.07712:2441 72.08088:47233 84.08086:97392 96.05273:1993 98.09624:4222 103.62624:1877 126.0914:4407 130.08629:287075 143.11818:2770 143.99852:3021 144.10201:53648 161.12842:38077	378018	799858	91420	253763	173502	2264728	218729	418783	197012	134354	390292	1338382	181764	574083	351840	105895	248869	422599	986127	4537298	2420844	1759194	1906250	404195	951158	635052	1607678	64282	335808	724903	433576	269928	99200
6.05_152.08	152.082	6.049	N-omega-Acetylhistamine	Organic acids and derivatives	Carboxylic acids and derivatives	Carboxylic acid derivatives	Carboxylic acid amides	biogenic monoamines	1	HILIC ESI-	[M-H]-	C7H11N3O	XJWPISBUKWZALE-UHFFFAOYSA-N	CC(=O)NCCC1=CN=CN1	69602	63.99792:2033 69.25218:1885 78.95792:3406 81.04459:3046 92.89565:2180 110.07111:236445 124.99993:9841 152.03415:3499 152.0817:24476 152.35425:1749	43996	66639	1678	483	40997	262667	198667	126702	88608	648926	1381	383132	150645	2749	31304	223019	168867	51595	482127	2507320	4355771	2156724	432442	439439	1130044	282474	7958741	2426	282728	474809	130073	103099	188267
46258	117	822782	nonadecanoic acid	Lipids and lipid-like molecules	Fatty Acyls	Fatty acids and conjugates	Long-chain fatty acids	saturated_FA	1	GCMS		C19H38O2	ISYWECDDZWTKFF-UHFFFAOYSA-N	CCCCCCCCCCCCCCCCCCC(=O)O	12591	85:1502.0 89:30.0 101:20.0 117:3559.0 118:308.0 129:1734.0 130:140.0 131:491.0 132:1487.0 134:55.0 135:25.0 145:565.0 146:4.0 150:7.0 159:47.0 173:18.0 185:102.0 187:34.0 201:139.0 213:2.0 241:13.0 246:10.0 283:25.0 285:5.0 313:22.0 327:21.0 328:30.0 339:2.0 341:7.0 346:3.0 354:7.0 355:315.0 356:200.0 357:42.0 358:14.0 364:1.0 403:4.0 428:8.0 484:8.0	3695	814	5654	6640	16355	4022	13499	1760	3375	9133	1914	1947	3619	5739	3571	4035	5091	6887	1828	3981	7059	4328	6225	10569	9418	3822	6128	6503	4697	3335	462	1147	3823
997	327	755409	octadecanol	Lipids and lipid-like molecules	Fatty Acyls	Fatty alcohols	Long-chain fatty alcohols	fatty alcohols	1	GCMS		C18H38O	GLDOVTGHNKAZLK-UHFFFAOYSA-N	CCCCCCCCCCCCCCCCCCO	8221	85:3812.0 86:224.0 87:853.0 88:401.0 89:7207.0 90:593.0 91:2611.0 92:281.0 93:206.0 94:57.0 95:784.0 96:291.0 97:9121.0 98:859.0 99:2097.0 100:378.0 101:3627.0 102:510.0 103:8469.0 104:862.0 105:36.0 109:308.0 110:74.0 111:3878.0 112:352.0 113:980.0 115:1693.0 116:209.0 121:32.0 123:60.0 124:45.0 125:1173.0 126:164.0 127:120.0 129:1075.0 137:28.0 139:257.0 140:47.0 141:118.0 143:377.0 144:41.0 14…	15097	10755	28574	16391	36419	7703	36346	12885	12592	39577	7850	9619	22601	16947	11446	20988	21310	25988	12436	17782	18562	14608	7174	26145	20649	10678	61745	13915	8347	12767	2443	6378	16161
20961	144	849710	oleamide	Lipids and lipid-like molecules	Fatty Acyls	Fatty amides	Fatty amides	unsaturated_FA	1	GCMS		C18H35NO	FATBGEAMYMYZAF-KTKRTIGZSA-N	CCCCCCCC/C=C\CCCCCCCC(=O)N	5283387	85:426.0 86:402.0 87:144.0 89:353.0 90:711.0 91:1369.0 92:194.0 93:400.0 94:235.0 95:556.0 96:526.0 97:627.0 98:214.0 99:199.0 100:1197.0 101:249.0 102:259.0 104:85.0 105:184.0 106:90.0 107:124.0 108:222.0 109:239.0 110:336.0 111:154.0 113:111.0 114:132.0 115:2827.0 116:11090.0 117:1116.0 118:448.0 119:161.0 120:59.0 121:55.0 122:381.0 123:147.0 124:172.0 125:88.0 126:316.0 127:230.0 128:10813.0 …	7201	8901	11206	51562	9823	13105	8392	9127	2442	18120	7327	3821	11475	7603	2594	9204	20906	20639	3803	7325	22928	8626	9605	52960	21021	18253	13296	18114	2616	6069	1617	3885	7616
7.45_155.01	155.009	7.449	Orotic acid	Organoheterocyclic compounds	Diazines	Pyrimidines and pyrimidine derivatives	Pyrimidinecarboxylic acids and derivatives	nucleoside metabolite	1	HILIC ESI-	[M-H]-	C5H4N2O4	PXQPEWDEAKTCGB-UHFFFAOYSA-N	C1=C(NC(=O)NC1=O)C(=O)O	967	54.53008:1749 67.02869:1963 111.01888:412031 138.11008:1938 154.9465:49450 155.0092:4455	2673753	707485	1563141	3997623	18690	7120759	37356	21567	22732	50017	6521248	567568	478163	3824742	408480	515470	206315	568063	580489	119032	30015	61411	1077115	273960	530658	844564	146070	133258	381283	374414	18542703	187642	309981
114235	204	996670	palatinitol	Lipids and lipid-like molecules	Fatty Acyls	Fatty acyl glycosides	Fatty acyl glycosides of mono- and disaccharides	sugars	1	GCMS		C12H24O11	SERLAGPUMNYUCK-DCUALPFSSA-N	C([C@@H]1[C@H]([C@@H]([C@H]([C@H](O1)OC[C@H]([C@H]([C@@H]([C@@H](CO)O)O)O)O)O)O)O)O	88735	85:1438.0 86:273.0 87:1813.0 88:733.0 89:6635.0 90:399.0 91:388.0 93:109.0 94:150.0 95:115.0 96:113.0 97:842.0 98:166.0 99:1256.0 100:130.0 101:11391.0 102:1556.0 103:55817.0 104:5311.0 105:2423.0 106:169.0 107:87.0 108:33.0 109:860.0 110:75.0 111:921.0 112:147.0 113:1878.0 114:285.0 115:2015.0 116:5670.0 117:33819.0 118:3257.0 119:2166.0 120:33.0 121:50.0 123:26.0 125:156.0 127:969.0 128:223.0 1…	1441	6885	3904	4404	2035	203	1506	402	384	839	6387	2309	1169	2766	19405	644	867	735	325	396	668	384	1207	1130	765	3409	568	921	2804	303	6368	1265	294
5.58_792.58	792.577	5.582	PC 32:0	Lipids and lipid-like molecules	Glycerophospholipids	Glycerophosphocholines	Phosphatidylcholines	saturated_phosphatidylcholines	1	CSH ESI-	[M+CH3COO]-	C40H80NO8P	KILNVBDSWZSGLL-KXQOOQHDSA-N	CCCCCCCCCCCCCCCC(=O)OC[C@H](COP(=O)([O-])OCC[N+](C)(C)C)OC(=O)CCCCCCCCCCCCCCC	452110	76.54803:3394 82.40131:2959 106.81886:3169 120.25016:3155 142.30328:3556 149.28717:3441 168.04253:6346 203.38213:5251 214.16223:3201 222.05769:3211 224.06938:4067 255.23274:333204 259.99225:3199 266.63049:3227 462.29962:3904 480.30963:5716 617.0957:3570 651.06073:3690 686.70374:4155 718.5426:82140 730.84357:3774	615425	nd	nd	379008	nd	433453	nd	nd	nd	43847	nd	nd	nd	63813	nd	9041	nd	nd	nd	nd	368962	nd	nd	nd	nd	nd	66477	nd	nd	55215	nd	nd	nd
5.62_760.58	760.585	5.624	PC 34:1	Lipids and lipid-like molecules	Glycerophospholipids	Glycerophosphocholines	Phosphatidylcholines	unsaturated_phosphatidylcholines	1	CSH ESI+	[M+H]+	C42H82NO8P	WTJKGGKOPKCXLL-VYOBOKEXSA-N	CCCCCCCCCCCCCCCC(=O)OC[C@H](COP(=O)([O-])OCC[N+](C)(C)C)OC(=O)CCCCCCC/C=C\CCCCCCCC	5497103	71.07306:19314 84.09385:3084 86.09658:296527 98.9846:17774 104.10693:21560 125.00002:149844 184.07356:3014008 319.06744:4348 321.55276:3285 390.18042:3415 496.33328:4623 654.25763:4478 760.43573:6544 760.58521:147118	9797730	120675	128843	8905997	55773	9862593	35493	52756	46922	286196	45142	50671	58586	2328530	27839	121454	36548	55987	51266	20894	42508	65243	72232	47650	35791	61325	146079	59377	29404	236994	431705	46433	43373
6.31_788.62	788.617	6.31	PC 36:1	Lipids and lipid-like molecules	Glycerophospholipids	Glycerophosphocholines	Phosphatidylcholines	unsaturated_phosphatidylcholines	1	CSH ESI+	[M+H]+	C44H86NO8P	ATHVAWFAEPLPPQ-VRDBWYNSSA-N	CCCCCCCCCCCCCCCCCC(=O)OC[C@H](COP(=O)([O-])OCC[N+](C)(C)C)OC(=O)CCCCCCC/C=C\CCCCCCCC	24778825	80.62912:3456 86.09129:4449 86.09644:61412 87.01087:3471 89.51833:3296 91.05399:3030 104.10637:4341 107.08566:3191 124.99979:31972 184.07333:640264 788.61322:40666	409287	4445	9014	451515	nd	457531	4457	nd	10197	43254	nd	4221	4248	135188	5332	15584	nd	4264	7231	6243	3662	6104	nd	nd	4342	7116	15088	5863	nd	45655	81448	6952	nd
4.73_782.57	782.569	4.733	PC 36:4	Lipids and lipid-like molecules	Glycerophospholipids	Glycerophosphocholines	Phosphatidylcholines	unsaturated_phosphatidylcholines	1	CSH ESI+	[M+H]+	C44H80NO8P	NKQPOVROGSWLTO-NVPMBMBWSA-N	CCCCCCCC/C=C\CCCCCCCC(=O)O[C@H](COC(=O)CCCC/C=C\C/C=C\C/C=C\CCCCC)COP(=O)([O-])OCC[N+](C)(C)C	52922783	71.07304:19107 77.52966:3804 86.09654:317329 98.98452:18079 102.12016:3246 104.10712:31860 124.98991:7130 124.99995:173192 125.01031:6268 132.53401:3424 184.0735:3485788 185.07732:4842 201.71597:6369 502.3302:3625 520.34088:4994 558.46106:4378 724.57385:4678 782.56934:192057	16403	nd	nd	40034	nd	7642	nd	nd	nd	nd	nd	13346	nd	11137	nd	nd	nd	nd	nd	nd	nd	nd	nd	nd	nd	nd	nd	nd	nd	3861	20850	nd	nd
6.78_728.56	728.561	6.783	PE O-36:2	Lipids and lipid-like molecules	Glycerophospholipids	Glycerophosphoethanolamines	1-(1Z-alkenyl),2-acylglycerophosphoethanolamines	unsaturated_phosphatidylethanolamines	1	CSH ESI-	[M-H]-	C41H80NO7P	OBAAWAYLQLYWNN-KHFVPPDWSA-N	CCCCCCCCCCCCCCCCCC(=O)O[C@H](CO/C=C\CCCCCC/C=C\CCCCCCCC)COP(=O)(O)OCCN	53480895	72.99158:7137 75.00736:39009 78.95755:19075 114.20333:3182 140.01056:6860 196.03842:4343 203.28429:4366 242.22142:3291 258.13605:2892 267.26956:7370 281.24844:561035 355.32114:5264 422.41626:3886 446.30051:17063 464.31412:37213 515.80524:3310 596.38257:5338 652.58551:33907 728.56116:89741	nd	nd	nd	nd	nd	nd	nd	nd	nd	nd	nd	nd	nd	nd	nd	8045	nd	nd	nd	nd	nd	nd	nd	nd	nd	nd	nd	nd	nd	nd	nd	nd	nd
6.10_700.53	700.529	6.098	PE P-34:1 and PE O-34:2	Lipids and lipid-like molecules	Glycerophospholipids	Glycerophosphoethanolamines	1-(1Z-alkenyl),2-acylglycerophosphoethanolamines	unsaturated_phosphatidylethanolamines	1	CSH ESI-	[M-H]-	C39H76NO7P	ZOSSFCIAXYNTHL-CSTBBDSDSA-N	CCCCCCCCCCCCCCCC(=O)O[C@H](CO/C=C\CCCCCC/C=C\CCCCCCCC)COP(=O)(O)OCCN	53480893	78.95773:14086 95.84784:3135 138.96834:3170 140.01093:6512 167.15097:3784 196.03711:11004 203.27695:6526 231.25839:2924 239.23682:3235 241.21724:14111 242.22159:5143 253.21832:3484 255.23277:163534 256.23682:14524 281.24847:299258 418.271:4955 436.28543:20473 462.29926:11650 615.44598:3919 700.5274:80628	nd	nd	nd	nd	nd	nd	nd	nd	nd	nd	nd	nd	nd	nd	nd	nd	nd	nd	nd	nd	nd	nd	nd	nd	nd	nd	nd	nd	nd	nd	nd	nd	nd
6.13_702.54	702.543	6.131	PE P-34:1 or PE O-34:2	Lipids and lipid-like molecules	Glycerophospholipids	Glycerophosphoethanolamines	Glycerophosphoethanolamines	unsaturated_phosphatidylethanolamines	1	CSH ESI+	[M+H]+	C39H76NO7P	SMPXBIVJXNXOAL-PRWZWGSOSA-N	CCCCCCCCCCCCCC/C=C\O[C@H](COC(=O)CCCCCCC/C=C\CCCCCCCC)COP(=O)(O)OCCN	53479657	71.04903:3816 71.08557:14540 74.60012:2570 79.05435:7350 81.07003:39840 83.08569:38887 85.10125:12356 89.05999:2885 93.06983:15264 95.08575:51519 97.0647:5188 97.10135:24684 100.55592:2915 102.12804:4571 107.08547:12319 109.10143:28266 111.117:10745 121.10123:19094 123.11669:6688 135.11697:20153 149.13278:12644 164.54832:3137 215.18048:4968 221.1535:3581 244.81468:3075 247.17046:3650 247.24106:40…	nd	nd	nd	nd	nd	nd	nd	nd	nd	nd	nd	nd	nd	nd	nd	nd	nd	nd	nd	nd	nd	nd	nd	nd	nd	nd	nd	nd	nd	nd	nd	nd	nd
50	215	399229	pelargonic acid	Lipids and lipid-like molecules	Fatty Acyls	Fatty acids and conjugates	Medium-chain fatty acids	saturated_FA	1	GCMS		C9H18O2	FBUKVWPVBMHYJY-UHFFFAOYSA-N	CCCCCCCCC(=O)O	8158	85:95.0 86:236.0 88:109.0 89:242.0 90:68.0 94:18.0 95:61.0 96:43.0 98:137.0 99:208.0 101:214.0 102:71.0 105:367.0 116:364.0 117:7457.0 118:623.0 119:191.0 123:20.0 128:63.0 129:2753.0 130:235.0 131:2172.0 132:1576.0 133:343.0 143:171.0 144:20.0 145:577.0 146:129.0 149:75.0 150:22.0 157:39.0 159:78.0 171:92.0 172:28.0 187:106.0 201:79.0 215:2429.0 216:383.0 217:112.0 221:143.0 222:38.0 252:13.0 25…	60495	24523	61276	81315	213526	23851	132192	33967	50883	123282	26026	17553	52094	36342	80160	85519	99054	60487	32772	54717	71888	41101	25724	130885	87960	44500	60042	65611	42453	23807	7548	12613	72678
360841	103	540818	pentose	Organic oxygen compounds	Organooxygen compounds	Carbohydrates and carbohydrate conjugates	Monosaccharides	sugars	1	GCMS		C5H10O5	SRBFZHDQGSBBOR-UHFFFAOYSA-N	C1C(C(C(C(O1)O)O)O)O	229	86:84.0 87:151.0 88:150.0 89:2738.0 90:255.0 91:147.0 100:725.0 101:866.0 102:397.0 103:16183.0 104:1583.0 105:958.0 112:39.0 113:133.0 114:181.0 115:222.0 116:195.0 117:2331.0 118:244.0 119:285.0 120:38.0 127:111.0 128:36.0 129:1766.0 130:290.0 131:842.0 132:128.0 133:1834.0 134:293.0 135:187.0 138:20.0 142:84.0 143:261.0 144:52.0 145:129.0 146:52.0 147:5147.0 148:807.0 149:544.0 157:106.0 158:8…	53725	396892	9317	33714	5678	9259	11559	4085	2430	6275	47093	8137	11812	18376	8775	3630	5172	6281	9648	4690	3096	7506	12348	25781	42286	6071	6735	81340	3164	7105	5633	7935	3400
31889	151	218927	phenol	Benzenoids	Phenols	1-hydroxy-4-unsubstituted benzenoids	1-hydroxy-4-unsubstituted benzenoids	phenolic natural products	1	GCMS		C6H6O	ISWSIDIOOBJBQZ-UHFFFAOYSA-N	C1=CC=C(C=C1)O	996	91:2045.0 92:161.0 93:334.0 94:209.0 95:2491.0 96:415.0 97:231.0 105:135.0 106:56.0 110:100.0 111:75.0 112:21.0 120:80.0 121:643.0 122:37.0 123:637.0 124:89.0 125:41.0 131:307.0 132:52.0 134:140.0 135:1287.0 136:193.0 137:125.0 145:37.0 149:73.0 150:28.0 151:15374.0 152:2150.0 153:646.0 154:68.0 166:3125.0 167:465.0 168:102.0 170:10.0 174:109.0 189:40.0 246:20.0 287:37.0 300:22.0 317:16.0 324:18.…	22852	1839	44279	70001	3666	23031	1753	30177	5982	55741	17576	13121	31915	26835	1295	33537	44345	47569	18441	23066	47461	29567	17060	93487	575	35161	43161	53493	45651	19950	4220	10383	21572
1733	164	368081	phenylacetic acid	Benzenoids	Benzene and substituted derivatives		Benzene and substituted derivatives	phenylacetates	1	GCMS		C8H8O2	WLJVXDMOQOGPHL-UHFFFAOYSA-N	C1=CC=C(C=C1)CC(=O)O	999	85:15.0 86:1825.0 87:567.0 88:240.0 89:6578.0 90:5347.0 91:20552.0 92:1827.0 93:126.0 94:19.0 95:266.0 97:74.0 100:1526.0 101:518.0 102:229.0 103:171.0 105:671.0 106:137.0 108:56.0 112:135.0 116:127.0 117:4352.0 118:2311.0 119:769.0 120:88.0 121:1111.0 122:24.0 123:38.0 124:38.0 130:280.0 131:53.0 132:343.0 133:940.0 135:497.0 136:21.0 137:6176.0 138:606.0 139:203.0 140:14.0 144:86.0 146:76.0 148…	2660	4468	2328	2344	21950	999	18279	7082	12429	68877	1747	5930	8577	6161	3861	9266	12256	6747	8743	51808	65392	36342	4035	17269	27345	2851	110290	3965	8490	19517	336	2029	11839
6.00_263.10	263.104	5.996	Phenylacetylglutamine	Organic acids and derivatives	Carboxylic acids and derivatives	Amino acids, peptides, and analogues	Amino acids and derivatives	di-peptides	1	HILIC ESI-	[M-H]-	C13H16N2O4	JFLIEFSWGNOPJJ-JTQLQIEISA-N	C1=CC=C(C=C1)CC(=O)N[C@@H](CCC(=O)N)C(=O)O	92258	75.52139:1993 81.01534:2147 99.15988:2071 127.05029:23863 128.03362:2439 145.06082:201994 165.97327:2097 258.18732:2421 263.10324:20217	437958	537	296390	322077	nd	2015944	nd	nd	nd	355	278286	nd	303	337265	3950835	55777	nd	nd	14391	562	11213	28619	475086	nd	469	nd	1339	68826	140792	23962	78082	9014	nd
6.90_166.09	166.086	6.897	Phenylalanine	Organic acids and derivatives	Carboxylic acids and derivatives	Amino acids, peptides, and analogues	Amino acids and derivatives	amino acids, aromatic	1	HILIC ESI+	[M+H]+	C9H11NO2	COLNVLDHVKWLRT-QMMMGPOBSA-N	C1=CC=C(C=C1)C[C@@H](C(=O)O)N	6140	50.10365:14520 58.78033:13894 64.10361:16676 65.47513:16137 71.71263:19245 86.73306:14278 103.05433:185493 107.04955:112754 120.08092:7909652 131.04939:283980 149.06015:93456 166.08606:339407 166.09886:18612	57363901	64607544	58799305	31177257	5952907	70602749	3443725	66864864	109848165	16515991	44583856	26771213	22010001	55807837	64787293	43630282	28838477	44869390	58040221	56236307	48378948	51563386	93796486	116036409	52219455	57975288	34153176	48980426	67497774	92978878	16854005	63498773	78468341
4	314	345365	phosphate	Homogeneous non-metal compounds	Non-metal oxoanionic compounds	Non-metal phosphates	Non-metal phosphates	polymers	1	GCMS		H3O4P	NBIIXXVUZAFLBC-UHFFFAOYSA-N	OP(=O)(O)O	1004	85:2157.0 86:4845.0 87:5305.0 88:1544.0 89:6178.0 90:913.0 91:5486.0 92:639.0 93:1090.0 94:256.0 95:178.0 96:901.0 97:221.0 98:1216.0 99:626.0 100:3524.0 103:17906.0 104:4250.0 105:12326.0 106:1911.0 107:7514.0 108:751.0 109:2429.0 110:239.0 112:225.0 113:1044.0 114:607.0 115:23611.0 116:3246.0 117:2166.0 118:1082.0 119:15220.0 120:2183.0 121:11456.0 122:1330.0 123:5152.0 124:478.0 125:397.0 126:…	28090	5115	8380	85451	944461	18633	277863	47452	362236	17125	46726	241	6305	58189	154624	9141	12713	57715	10424	2596	4186	7036	80998	525663	7536	15827	2962	33131	64291	2981	26970	4961	7509
4.52_835.54	835.536	4.522	PI 34:1|PI 16:0_18:1	Lipids and lipid-like molecules	Glycerophospholipids	Glycerophosphoinositols	Phosphatidylinositols	unsaturated_phosphatidylinositols	1	CSH ESI-	[M-H]-	C43H81O13P	PDLAMJKMOKWLAJ-AGORXRROSA-N	[C@]([H])(OC(CCCCCCC/C=C\CCCCCCCC)=O)(COP(=O)(O)O[C@H]1[C@H](O)[C@@H](O)[C@H](O)[C@@H](O)[C@H]1O)COC(CCCCCCCCCCCCCCC)=O		74.52563:3200 78.95779:39087 92.14182:3503 96.96837:7563 111.95066:2960 127.49372:3947 152.99493:32847 176.97478:3168 187.69958:3704 204.1124:3860 223.00079:19546 230.35948:3169 241.01122:86206 255.23279:126471 259.02225:5225 281.24857:148050 297.03696:4994 391.22562:30133 553.27844:21892 571.28583:4937 579.29382:4807 667.62329:3674 671.45917:3893 835.53455:187106	125420	nd	nd	112345	nd	165729	nd	nd	nd	nd	nd	nd	nd	16739	nd	nd	nd	nd	nd	nd	nd	nd	nd	nd	nd	nd	nd	nd	nd	nd	nd	nd	nd
4.15_833.52	833.52	4.149	PI 34:2|PI 16:0_18:2	Lipids and lipid-like molecules	Glycerophospholipids	Glycerophosphoinositols	Phosphatidylinositols	unsaturated_phosphatidylinositols	1	CSH ESI-	[M-H]-	C43H79O13P	ZPUUVEHXYAPJAQ-KOHXHNRGSA-N	[C@]([H])(OC(CCCCCCC/C=C\C/C=C\CCCCC)=O)(COP(=O)(O)O[C@H]1[C@H](O)[C@@H](O)[C@H](O)[C@@H](O)[C@H]1O)COC(CCCCCCCCCCCCCCC)=O		74.6877:3551 78.9576:50985 96.96816:14548 152.99484:42377 157.0331:3178 198.78305:3539 203.4431:5093 223.00085:22981 241.01151:103483 255.23274:180007 259.0199:11332 279.19916:7285 279.23276:169858 297.0379:15445 353.96249:3608 391.22562:33710 415.22537:3828 525.77197:3665 553.27673:37015 571.28894:4690 577.28027:6809 804.80566:3549 833.51874:225682	142047	nd	nd	115735	nd	97752	nd	nd	nd	nd	nd	nd	nd	nd	nd	nd	nd	nd	nd	nd	nd	nd	nd	nd	nd	nd	nd	nd	nd	nd	nd	nd	nd
5.07_863.57	863.566	5.067	PI 36:1	Lipids and lipid-like molecules	Glycerophospholipids	Glycerophosphoinositols	Phosphatidylinositols	unsaturated_phosphatidylinositols	1	CSH ESI-	[M-H]-	C45H85O13P	YOBFISPJJWPPTK-JUCSSFOXSA-N	CCCCCCCCCCCCCCCCCC(=O)OCC(COP(=O)(O)OC1C(C(C(C(C1O)O)O)O)O)OC(=O)CCCCCCCC=CCCCCCCCC		72.26707:3091 72.62404:3277 78.95751:32214 88.53873:3282 96.96816:5454 119.65172:3717 128.83519:3654 143.38051:3981 147.87173:3352 152.99503:26341 200.96132:3383 203.12878:4502 203.14589:5161 223.0007:15153 241.01155:73063 267.33771:3671 281.24817:90106 283.26413:107297 297.03558:4581 361.99789:3713 419.25507:18965 581.30933:7686 863.56665:142941	482659	nd	nd	425104	nd	472084	nd	nd	nd	nd	nd	nd	nd	40803	nd	nd	nd	nd	nd	nd	nd	nd	nd	nd	nd	nd	nd	nd	nd	nd	nd	nd	nd
4.63_861.55	861.551	4.632	PI 36:2	Lipids and lipid-like molecules	Glycerophospholipids	Glycerophosphoinositols	Phosphatidylinositols	unsaturated_phosphatidylinositols	1	CSH ESI-	[M-H]-	C45H83O13P	KZVRAFHIKMDULK-PDPKURFXSA-N	CCCCCCCCCCCCCCCCCC(=O)OCC(COP(O)(=O)OC1C(O)C(O)C(O)C(O)C1O)OC(=O)CCCCCCC\C=C/C\C=C/CCCCC		78.95777:61818 88.94895:3183 96.96843:14169 121.60961:3505 152.96538:3558 152.99477:55340 180.81244:4368 194.44431:3766 203.30951:3774 222.99994:34896 241.01195:118107 259.0224:14367 279.23288:184423 281.24829:6555 283.26437:193200 283.29984:7777 286.72687:3637 297.0383:6678 315.04984:5114 419.25906:37440 581.31024:37635 620.73517:3377 861.55121:268056	12717	nd	nd	17920	nd	21565	nd	nd	nd	nd	nd	nd	nd	nd	nd	nd	nd	nd	nd	nd	nd	nd	nd	nd	nd	nd	nd	nd	nd	nd	nd	nd	nd
4.58_885.55	885.551	4.582	PI 38:4|PI 18:0_20:4	Lipids and lipid-like molecules	Glycerophospholipids	Glycerophosphoinositols	Phosphatidylinositols	unsaturated_phosphatidylinositols	1	CSH ESI-	[M-H]-	C47H83O13P	KRTOMQDUKGRFDJ-MWZLTEOLSA-N	[C@]([H])(OC(CCC/C=C\C/C=C\C/C=C\C/C=C\CCCCC)=O)(COP(=O)(O)O[C@H]1[C@H](O)[C@@H](O)[C@H](O)[C@@H](O)[C@H]1O)COC(CCCCCCCCCCCCCCCCC)=O		78.9577:61364 96.4408:3402 96.96835:13450 103.77369:3833 104.09284:3033 126.53922:3639 138.35265:3313 152.99463:48811 200.33667:8515 200.35907:16634 206.70447:3693 223.00011:30559 241.01178:165878 259.0217:7272 259.24393:7773 269.24979:6082 283.26395:216637 297.03973:16509 303.23303:148150 315.0499:5907 419.25537:34979 581.31036:38638 599.32202:6666 601.27509:5009 885.55042:255987	59101	nd	nd	63113	nd	76684	nd	nd	nd	nd	nd	nd	nd	nd	nd	nd	nd	nd	nd	nd	nd	nd	nd	nd	nd	nd	nd	nd	nd	nd	nd	nd	nd
1.85_159.07	159.065	1.849	Pimelic acid	Lipids and lipid-like molecules	Fatty Acyls	Fatty acids and conjugates	Medium-chain fatty acids	dicarboxylic acids	1	HILIC ESI-	[M-H]-	C7H12O4	WLJVNTCWHIRURA-UHFFFAOYSA-N	C(CCC(=O)O)CCC(=O)O	385	59.01265:8374 70.74519:3648 72.65098:3805 73.28624:3439 74.918:4349 81.03335:20941 95.04909:40398 95.74581:4064 97.06469:1228188 98.06812:18776 115.07532:1236409 115.9439:6001 116.07858:24353 141.05486:46498 159.06546:823331	546730	520900	84350	94681	239328	1525550	387010	290341	167411	242053	207862	524680	287872	103697	2882256	453261	178893	291567	492706	1940695	1922133	990170	321805	327878	909018	551201	4874288	174049	213206	609994	224398	208537	197002
16544	260	622466	pinitol	Organic oxygen compounds	Organooxygen compounds	Alcohols and polyols	Secondary alcohols	phenolic natural products	1	GCMS		C7H14O6	DSCFFEYYQKSRSV-FEPQRWDDSA-N	COC1[C@@H]([C@H](C([C@@H]([C@@H]1O)O)O)O)O	164619	85:9395.0 86:1247.0 87:3795.0 88:1582.0 89:101591.0 90:8600.0 91:6349.0 92:451.0 93:526.0 94:227.0 95:1533.0 96:175.0 97:1364.0 98:1082.0 99:8159.0 100:1129.0 101:11924.0 102:3254.0 103:78294.0 104:7604.0 105:5939.0 106:408.0 107:576.0 108:301.0 109:3162.0 110:453.0 111:5748.0 112:942.0 113:3906.0 114:782.0 115:5105.0 116:17470.0 117:11099.0 118:1686.0 119:8789.0 120:980.0 121:694.0 122:26.0 123:…	1062	25080	2141	791	2407	6132	9213	1762	879	2426	343	9874	1602	674	654	3235	783	2405	5296	7220	5102	8185	502	944	747	29424	3648	689	1289	496	119	2120	5174
8.83_229.13	229.118	8.829	Proline-hydroxyproline	Organic acids and derivatives	Carboxylic acids and derivatives	Amino acids, peptides, and analogues	Peptides	di-peptides	1	HILIC ESI+	[M+H]+	C10H16N2O4	ONPXCLZMBSJLSP-CSMHCCOUSA-N	C1C[C@H]([NH2+]C1)C(=O)N2C[C@@H](C[C@H]2C(=O)[O-])O	11902892	50.25668:2119 58.06551:2894 59.15274:2086 59.56934:2220 67.05429:2580 70.06528:922433 70.57964:2229 72.0807:3785 86.06026:10210 109.10141:2902 132.06557:232887 140.14328:5162 147.42751:2455 193.7953:2722 198.78868:4893 198.80923:4800 229.1185:495320 229.15508:23117	2653894	6009700	324511	2276894	141499	4326882	298831	1636906	715595	32236	3933132	3755983	2004890	4685091	299341	305214	620748	1569986	638681	1325426	521780	619922	5964018	1804083	2205844	3825005	463606	2035952	2494757	1908369	300855	1022458	360563
282	177	214380	propane-1,3-diol	Organic oxygen compounds	Organooxygen compounds	Alcohols and polyols	Primary alcohols	propylene glycols	1	GCMS		C3H8O2	YPFDHNVEDLHUCE-UHFFFAOYSA-N	C(CO)CO	10442	85:801.0 86:145.0 87:673.0 99:342.0 100:269.0 101:1134.0 102:390.0 103:1442.0 104:191.0 105:263.0 113:55.0 115:7165.0 116:474.0 119:330.0 129:59.0 130:5199.0 131:1969.0 133:1784.0 135:367.0 145:32.0 147:17505.0 148:2962.0 149:1307.0 150:157.0 151:34.0 163:52.0 164:30.0 176:36.0 177:1417.0 178:147.0 179:81.0 180:21.0 183:38.0 186:23.0 192:22.0 201:32.0 203:21.0 205:278.0 213:45.0 227:17.0 231:24.0…	902	58839	1549	105982	4535	750	880	67568	12971	2575	32134	43033	98073	1221	6882	1199	99786	101097	55608	76036	135316	108460	37556	280466	2244	919	1790	1329	1044	1089	183	648	64430
PA			Propinoic Acid	Organic acids and derivatives	Carboxylic acids and derivatives	Carboxylic acids	Carboxylic acids	butyrates	1	SCFA_GC		C3H6O2	XBDQKXXYIPTUBI-UHFFFAOYSA-N	CCC(=O)O	1032		109	1638	90	38	1006	82	451	1368	1376	664	181	1668	1286	161	107	1002	771	1313	1240	1441	1047	1319	135	1057	1445	1728	1159	335	443	1060	65	1304	1105
360579	117	177885	propyleneglycol	Organic oxygen compounds	Organooxygen compounds	Alcohols and polyols	Polyols	propylene glycols	1	GCMS		C3H8O2	DNIAPMSPPWPWGF-GSVOUGTGSA-N	C[C@H](CO)O	259994	87:604.0 91:193.0 92:305.0 94:153.0 97:748.0 101:759.0 103:1633.0 110:1040.0 115:939.0 116:454.0 117:39274.0 118:3575.0 119:1931.0 127:624.0 131:1857.0 133:3826.0 137:250.0 140:4249.0 142:339.0 147:24010.0 148:3080.0 149:2216.0 150:108.0 155:254.0 163:151.0 167:121.0 205:1181.0 206:148.0 212:38.0 236:65.0 249:357.0 252:55.0 262:31.0 274:28.0 277:53.0 279:51.0 292:25.0 297:29.0 304:30.0 310:19.0 3…	201329	161046	255926	199573	848949	50181	320953	151094	57643	465013	503188	164095	296125	273110	23208	373113	1493194	244183	260889	494337	206755	460990	47085	161726	227560	93746	404447	128629	84652	219093	66969	276444	351856
417668	215	981268	prunin	Phenylpropanoids and polyketides	Flavonoids	Flavonoid glycosides	Flavonoid O-glycosides	phenolic natural products	1	GCMS		C21H22O10	DLIKSSGEMUFQOK-SFTVRKLSSA-N	C1[C@H](OC2=CC(=CC(=C2C1=O)O)O[C@H]3[C@@H]([C@H]([C@@H]([C@H](O3)CO)O)O)O)C4=CC=C(C=C4)O	92794	87:402.0 88:88.0 89:1237.0 94:44.0 96:150.0 100:201.0 101:632.0 102:310.0 103:8014.0 104:650.0 105:391.0 109:299.0 110:138.0 111:200.0 112:138.0 113:376.0 114:1233.0 115:424.0 116:800.0 117:3884.0 118:300.0 119:90.0 125:203.0 127:242.0 129:5576.0 130:713.0 131:2029.0 132:684.0 133:1443.0 134:148.0 135:195.0 139:102.0 140:158.0 141:191.0 142:268.0 143:934.0 144:1061.0 145:496.0 146:116.0 147:7731.…	774	18900	480	497	1185	1521	1215	2094	318	483	533	5626	1350	718	2896	283	454	505	242	323	919	611	1264	548	486	4115	563	1392	1989	253	228	2951	392
7.04_243.06	243.062	7.041	Pseudouridine	Nucleosides, nucleotides, and analogues	Nucleoside and nucleotide analogues		Nucleoside and nucleotide analogues	nucleoside metabolite	1	HILIC ESI-	[M-H]-	C9H12N2O6	PTJWIQPHWPFNBW-GBNDHIKLSA-N	C1=C(C(=O)NC(=O)N1)[C@H]2[C@@H]([C@@H]([C@H](O2)CO)O)O	15047	110.02349:13657 111.01865:7579 115.33236:1921 140.03403:23335 153.02956:231554 183.04031:33621 199.88405:8591 211.69794:2222 243.06195:41759	1728730	1153314	190720	957882	12673	2999327	144485	1772259	1278969	14348	2832039	522452	631328	899276	2944192	1211582	1836048	1475815	1496868	492725	527768	703743	1528838	152041	374190	1260665	118247	259999	477136	573321	86346	1742821	976661
2.44_119.04	119.035	2.437	Purine	Organoheterocyclic compounds	Imidazopyrimidines	Purines and purine derivatives	Purines and purine derivatives	nucleoside metabolite	1	HILIC ESI-	[M-H]-	C5H4N4	KDCGOANMDULRCW-UHFFFAOYSA-N	C1=C2C(=NC=N1)N=CN2	1044	79.37794:1750 92.02386:3187 118.92349:19301 119.02501:4700 119.03507:70507	6221	26570	9912	15409	2515	18167	5538	61633	167780	7704	9828	13747	4620	11585	7133	146708	98844	8212	3364	39802	2831	166140	2371	57554	8823	8939	4696	34348	10064	155643	19696	74576	2525
3.88_170.08	170.081	3.882	Pyridoxine	Organoheterocyclic compounds	Pyridines and derivatives	Pyridoxines	Pyridoxines	nucleoside metabolite	1	HILIC ESI+	[M+H]+	C8H11NO3	LXNHXLLTXMVWPM-UHFFFAOYSA-N	CC1=NC=C(C(=C1O)CO)CO	1054	53.63138:2307 58.0653:11309 69.06972:2583 73.19132:2160 74.07113:16783 81.03362:20848 82.06504:3660 84.04452:3130 92.04916:4462 92.9797:2408 96.08099:3103 97.0284:4255 100.07563:49925 110.06003:18664 112.05026:14572 124.07568:28805 125.0962:2488 125.10677:4190 128.07016:10164 134.0426:2721 134.05989:194700 152.07047:1467074 153.09097:3488 170.08095:481518 170.0945:137562 170.11671:17001 170.15318…	40528	303833	11455	13155	133846	54561	161713	126389	93841	53544	20964	305094	182044	21957	32060	52583	48999	52829	120763	327017	340772	191026	88005	108002	264059	285822	767216	25609	141370	141635	148428	170605	156309
483	240	394886	pyrrole-2-carboxylic acid	Organoheterocyclic compounds	Pyrroles	Pyrrole carboxylic acids and derivatives	Pyrrole carboxylic acids	nicotinic acids	1	GCMS		C5H5NO2	WRHZVMBBRYBTKZ-UHFFFAOYSA-N	C1=CNC(=C1)C(=O)O	12473	85:197.0 86:123.0 87:373.0 88:254.0 92:277.0 93:53.0 94:332.0 96:322.0 98:159.0 99:30.0 101:198.0 102:209.0 105:114.0 106:250.0 107:47.0 108:1034.0 109:208.0 110:50.0 111:112.0 113:272.0 114:245.0 117:297.0 118:440.0 119:305.0 120:140.0 121:17.0 122:88.0 123:107.0 124:325.0 125:87.0 126:128.0 128:224.0 131:462.0 132:437.0 134:339.0 135:95.0 136:231.0 137:168.0 142:216.0 143:18.0 144:112.0 145:145…	1067	1211	1008	1166	720	3542	1052	234	972	1550	519	899	915	1599	686	2531	1376	3405	1294	2393	3395	7690	499	1250	9470	2967	1892	2118	935	5318	153	1309	2921
4523	345	634900	quinic acid	Organic oxygen compounds	Organooxygen compounds	Alcohols and polyols	Cyclic alcohols and derivatives	phenolic natural products	1	GCMS		C7H12O6	AAWZDTNXLSGCEK-LNVDRNJUSA-N	C1[C@H](C([C@@H](CC1(C(=O)O)O)O)O)O	6508	87:107.0 91:114.0 92:3.0 93:26.0 99:91.0 100:4.0 106:51.0 108:3.0 112:77.0 115:536.0 119:77.0 120:17.0 121:29.0 123:21.0 124:12.0 125:18.0 126:140.0 127:330.0 130:94.0 131:533.0 132:2.0 133:745.0 134:431.0 136:13.0 137:5.0 138:6.0 139:136.0 141:559.0 143:468.0 147:4537.0 148:790.0 149:692.0 150:49.0 151:189.0 154:24.0 157:65.0 158:6.0 161:36.0 165:9.0 167:239.0 168:114.0 169:34.0 176:73.0 181:98.…	87026	62480	35475	79263	16100	70194	73190	51971	40709	3053	209544	62412	16534	74563	3148	20430	1849	19996	123057	34903	15744	50139	14080	5762	33449	238685	24460	11313	57877	6343	13197	95790	42420
3190	361	1120886	raffinose	Organic oxygen compounds	Organooxygen compounds	Carbohydrates and carbohydrate conjugates	Oligosaccharides	sugars	1	GCMS		C18H32O16	MUPFEKGTMRGPLJ-ZQSKZDJDSA-N	C([C@@H]1[C@@H]([C@@H]([C@H]([C@H](O1)OC[C@@H]2[C@H]([C@@H]([C@H]([C@H](O2)O[C@]3([C@H]([C@@H]([C@H](O3)CO)O)O)CO)O)O)O)O)O)O)O	439242	85:33.0 86:57.0 89:118.0 97:9.0 99:119.0 101:141.0 103:2918.0 104:200.0 109:167.0 113:29.0 115:39.0 116:161.0 117:590.0 119:118.0 127:20.0 129:3784.0 130:442.0 131:389.0 132:40.0 133:755.0 139:34.0 141:95.0 142:74.0 143:448.0 144:16.0 145:42.0 147:2732.0 148:202.0 149:232.0 150:2.0 153:60.0 155:407.0 156:35.0 157:463.0 158:48.0 159:18.0 161:17.0 162:10.0 163:129.0 169:2550.0 170:335.0 171:169.0 1…	3233	231	11118	20036	1152	51354	677	256	191	384	15060	239	381	14263	871	602	310	738	322	190	177	446	1415	227	354	901	278	285	328	187	937	155	186
7362	217	575497	ribitol	Organic oxygen compounds	Organooxygen compounds	Carbohydrates and carbohydrate conjugates	Sugar alcohols	sugar alcohols	1	GCMS		C5H12O5	HEBKCHPVOIAQTA-ZXFHETKHSA-N	C([C@H]([C@H]([C@H](CO)O)O)O)O	827	85:248.0 86:43.0 87:65.0 88:62.0 89:897.0 90:98.0 92:20.0 95:22.0 99:113.0 100:224.0 101:774.0 102:28.0 103:6316.0 104:624.0 105:415.0 107:35.0 109:433.0 110:374.0 111:71.0 112:1.0 113:273.0 114:80.0 115:19.0 116:274.0 117:7478.0 118:701.0 119:297.0 126:2.0 128:44.0 129:3713.0 130:874.0 131:1633.0 132:149.0 133:1838.0 134:180.0 135:129.0 136:1.0 140:1.0 142:152.0 143:478.0 145:98.0 146:11.0 147:7…	13201	20815	6195	1988	577372	3444	4003	4334	2190	115	2990	39704	1311	9704	17243	2072	1525	1929	15268	2634	2328	3934	13879	1608	3415	35558	1802	17547	4264	6582	361	47030	3049
6.13_377.15	377.145	6.134	Riboflavin	Organoheterocyclic compounds	Pteridines and derivatives	Alloxazines and isoalloxazines	Flavins	phenolic natural products	1	HILIC ESI+	[M+H]+	C17H20N4O6	AUNGANRZJHBGPY-SCRDCRAPSA-N	CC1=CC2=C(C=C1C)N(C3=NC(=O)NC(=O)C3=N2)C[C@@H]([C@@H]([C@@H](CO)O)O)O	493570	53.03885:17170 55.01808:2966 56.14458:2575 57.0338:57930 59.04939:6160 61.02854:19375 69.03362:89686 71.01294:23959 71.04914:34311 73.02838:21850 74.79057:2796 75.04412:22474 80.11243:2388 81.0296:2209 81.03358:35230 99.04404:73860 117.05444:15732 172.08662:42001 190.09795:3671 200.08203:28199 203.06828:2550 216.07684:39041 218.09167:5931 243.08751:1080642 244.07089:6349 252.11263:3062 257.10291:…	49001	208912	34303	nd	151370	76759	94271	483439	774799	200131	nd	209861	287778	47295	84697	535993	111290	220393	374347	389036	383626	421596	113370	295569	758928	514083	652064	29661	286751	191093	103696	611633	600765
84543	292	597646	ribonic acid	Organic oxygen compounds	Organooxygen compounds	Carbohydrates and carbohydrate conjugates	Sugar acids and derivatives	sugars	1	GCMS		C5H10O6	QXKAIJAYHKCRRA-BXXZVTAOSA-N	C([C@H]([C@H]([C@H](C(=O)O)O)O)O)O	5460677	86:34.0 87:189.0 88:350.0 89:1206.0 93:89.0 97:163.0 99:271.0 101:1055.0 102:1149.0 103:14449.0 104:1343.0 105:510.0 111:142.0 113:391.0 114:65.0 115:244.0 116:292.0 117:4183.0 118:357.0 119:78.0 125:85.0 129:1808.0 130:1437.0 131:1358.0 132:316.0 133:4108.0 134:646.0 135:379.0 141:281.0 142:49.0 143:1809.0 144:219.0 145:92.0 147:15767.0 148:2552.0 149:1820.0 150:145.0 151:61.0 157:484.0 159:32.0…	17994	6170	3708	4178	3169	29114	5290	1894	1132	3513	2410	802	2831	4282	2740	2639	2552	5645	1079	1274	2385	1546	1057	1426	3086	3167	5504	3202	1441	1832	262	949	919
4.68_149.04	149.044	4.682	Ribose	Organic oxygen compounds	Organooxygen compounds	Carbohydrates and carbohydrate conjugates	Monosaccharides	sugars	1	HILIC ESI-	[M-H]-	C5H10O5	SRBFZHDQGSBBOR-SOOFDHNKSA-N	C1[C@H]([C@H]([C@H](C(O1)O)O)O)O	10975657	59.01249:20622 60.44046:2158 69.3315:2477 69.9546:2561 71.01238:9748 82.73711:2070 89.02271:3889 97.15096:2192 108.07972:2401	46223	1575377	13041	25263	11834	161184	196110	281858	335742	9850	86638	694598	174780	33189	50870	87948	4814	8028	761461	966344	184613	250108	720009	479558	1994725	437221	372886	83976	256797	375320	101874	873773	547899
11214	333	699211	saccharic acid	Organic oxygen compounds	Organooxygen compounds	Carbohydrates and carbohydrate conjugates	Sugar acids and derivatives	sugar acids	1	GCMS		C6H10O8	DSLZVSRJTYRBFB-LLEIAEIESA-N	[C@H]([C@@H]([C@@H](C(=O)O)O)O)([C@H](C(=O)O)O)O	33037	85:376.0 86:223.0 87:56.0 89:377.0 90:30.0 91:59.0 93:137.0 94:112.0 95:140.0 99:663.0 100:177.0 101:426.0 102:1251.0 103:1710.0 104:173.0 105:104.0 106:11.0 108:89.0 110:106.0 111:181.0 112:63.0 113:312.0 114:10.0 115:253.0 116:35.0 117:1458.0 118:146.0 119:195.0 121:344.0 123:7.0 124:91.0 127:309.0 129:1394.0 130:600.0 131:1538.0 132:485.0 133:2043.0 134:499.0 135:122.0 138:17.0 139:23.0 140:81…	16279	3053	2595	10347	841	100635	2115	1847	169	200	2747	833	268	3232	1468	1419	1101	492	770	158	436	600	1945	1154	868	353	626	2904	108	136	104	196	510
31381	193	406586	salicylaldehyde	Organic oxygen compounds	Organooxygen compounds	Carbonyl compounds	Aldehydes	phenolic natural products	1	GCMS		C7H6O2	SMQUZDBALVYZAC-UHFFFAOYSA-N	C1=CC=C(C(=C1)C=O)O	6998	87:65.0 88:27.0 91:2744.0 92:52.0 93:36.0 96:138.0 106:52.0 116:33.0 119:4401.0 120:166.0 121:90.0 122:22.0 131:176.0 147:3598.0 148:313.0 149:2954.0 150:336.0 161:43.0 163:81.0 165:50.0 177:40.0 191:84.0 193:3524.0 194:513.0 195:154.0 207:198.0 208:407.0 215:48.0 221:2397.0 222:521.0 223:306.0 224:98.0 225:11.0 249:78.0 251:65.0 254:26.0 255:54.0 264:27.0 267:587.0 268:77.0 269:124.0 281:629.0 2…	3028	3265	4463	8027	3290	1715	8783	406	3477	7700	1415	1724	5384	4465	2733	5117	4249	5244	1586	3440	4521	4562	1778	4763	7272	2810	7712	6572	3152	2455	507	1305	4132
1.18_361.17	361.166	1.177	Secoisolariciresinol	Lignans, neolignans and related compounds	Dibenzylbutane lignans	Dibenzylbutanediol lignans	Dibenzylbutanediol lignans	phenolic natural products	1	HILIC ESI-	[M-H]-	C20H26O6	PUETUDUXMCLALY-HOTGVXAUSA-N	COC1=C(C=CC(=C1)C[C@@H](CO)[C@@H](CC2=CC(=C(C=C2)O)OC)CO)O	65373	71.4987:2140 96.51869:2122 167.03336:2568 169.01537:2125 195.0657:3135 198.50438:10737 202.06403:8130 203.07054:11683 205.05098:2503 205.08522:3308 216.07945:2384 217.08577:3414 219.06581:18908 234.08928:3863 248.10547:4674 285.14874:5426 302.15344:2638 317.17563:4473 329.14014:28114 346.14218:10220 361.16684:27845	4669	14495	2576	1050	4561	4988	4437	23363	28531	41611	4933	11723	34994	848	4599	7422	6801	2611	30248	106087	231269	78279	2461	4379	43000	7811	291602	11711	44292	38159	6995	13228	17290
8.70_104.03	104.034	8.695	Serine	Organic acids and derivatives	Carboxylic acids and derivatives	Amino acids, peptides, and analogues	Amino acids and derivatives	amino acids	1	HILIC ESI-	[M-H]-	C3H7NO3	MTCFGRXMJLQNBG-REOHCLBHSA-N	C([C@@H](C(=O)O)N)O	5951	52.50233:1778 65.53277:1886 66.52882:1689 72.00776:10502 74.02357:15944 79.77367:2043 104.03414:7677	1782600	7116256	5916013	2907173	134734	6841919	1838583	5366247	11682093	527324	5298739	5174518	1439673	4410273	9000396	2971194	257355	481248	6632126	5599083	1411713	1122054	12137599	1138240	9454787	8277718	3824519	4460674	3728507	9009573	2051876	11469965	11589553
286	204	611100	shikimic acid	Organic oxygen compounds	Organooxygen compounds	Alcohols and polyols	Cyclic alcohols and derivatives	phenolic natural products	1	GCMS		C7H10O5	JXOHGGNKMLTUBP-HSUXUTPPSA-N	C1[C@H]([C@@H]([C@@H](C=C1C(=O)O)O)O)O	8742	85:149.0 87:51.0 89:152.0 90:30.0 91:290.0 92:189.0 93:498.0 94:99.0 95:323.0 96:150.0 97:191.0 98:58.0 99:248.0 100:45.0 101:676.0 103:796.0 104:122.0 105:435.0 107:157.0 108:97.0 109:114.0 111:293.0 112:57.0 113:62.0 114:60.0 115:150.0 116:435.0 117:504.0 118:76.0 119:240.0 121:261.0 122:62.0 123:242.0 125:205.0 126:81.0 128:58.0 131:777.0 132:71.0 133:2652.0 134:351.0 135:280.0 137:3.0 138:27.…	25086	7120	13279	20270	12267	83155	12057	887	3153	4090	19039	2649	3844	16405	4540	12941	4428	16393	3903	3589	5696	2765	3744	4799	5706	21726	5283	5086	6247	3119	1251	6730	4797
5.08_763.60	763.598	5.078	SM 34:0;2O	Lipids and lipid-like molecules	Sphingolipids	Phosphosphingolipids	Sphingomyelins	sphingomyelins	1	CSH ESI-	[M+CH3COO]-	C39H81N2O6P	QHZIGNLCLJPLCU-QPPIDDCLSA-N	CCCCCCCCCCCCCCC[C@H]([C@H](COP(=O)([O-])OCC[N+](C)(C)C)NC(=O)CCCCCCCCCCCCCCC)O	9939965	78.95773:139909 110.7459:3269 121.75522:3357 122.98396:5807 140.01077:15093 160.25893:2958 167.27753:3115 168.04221:136848 171.82722:3645 204.34381:3083 239.87982:3460 535.48029:3605 689.56104:317044 705.56165:13665	340568	nd	nd	895288	nd	159679	nd	nd	nd	nd	nd	19281	nd	140333	nd	nd	nd	nd	nd	nd	nd	nd	nd	nd	nd	nd	nd	nd	nd	nd	nd	nd	nd
4.84_761.58	761.582	4.844	SM 34:1;2O	Lipids and lipid-like molecules	Sphingolipids	Phosphosphingolipids	Phosphosphingolipids	sphingomyelins	1	CSH ESI-	[M+CH3COO]-	C39H79N2O6P	RWKUXQNLWDTSLO-GWQJGLRPSA-N	CCCCCCCCCCCCCCCC(=O)N[C@@H](COP(=O)([O-])OCC[N+](C)(C)C)[C@@H](/C=C/CCCCCCCCCCCCC)O	9939941	75.27345:3371 78.9577:108407 88.54695:2791 102.91134:3296 166.36407:3426 168.04221:116642 202.91646:5584 225.18559:230869 269.24863:96064 301.39835:3306 316.31854:3148 471.32623:5456 615.50372:3487 629.33545:3963 629.52112:5473 679.50848:70078 687.54492:230812 737.76501:4297	338340	nd	nd	620074	nd	212245	nd	nd	nd	nd	nd	18462	nd	157246	nd	nd	nd	nd	nd	nd	nd	nd	nd	nd	nd	nd	nd	nd	nd	nd	nd	nd	nd
7.56_873.71	873.709	7.562	SM 42:1;2O	Lipids and lipid-like molecules	Sphingolipids	Phosphosphingolipids	Phosphosphingolipids	sphingomyelins	1	CSH ESI-	[M+CH3COO]-	C47H95N2O6P	QEDPUVGSSDPBMD-XTAIVQBESA-N	CCCCCCCCCCCCCCCCCCCCCCCC(=O)N[C@@H](COP(=O)([O-])OCC[N+](C)(C)C)[C@@H](/C=C/CCCCCCCCCCCCC)O	44260127	78.95769:162508 168.0421:153396 176.81898:4320 202.9794:4111 202.99748:6276 211.96272:3570 308.73071:3902 496.11615:4952 551.51605:3585 741.60834:29544 799.67126:300358	42932	7946	16407	93233	9208	25610	nd	5154	17824	11748	16891	10678	10311	9453	9404	8482	nd	nd	nd	6701	nd	nd	9673	nd	6550	nd	10133	nd	nd	7028	nd	8997	10134
5.48_731.61	731.606	5.477	SM d36:1	Lipids and lipid-like molecules	Sphingolipids	Phosphosphingolipids	Sphingomyelins	unsaturated_phosphatidylcholines	1	CSH ESI+	[M+H]+	C41H83N2O6P	LKQLRGMMMAHREN-YJFXYUILSA-N	CCCCCCCCCCCCCCCCCC(=O)N[C@@H](COP(=O)([O-])OCC[N+](C)(C)C)[C@@H](/C=C/CCCCCCCCCCCCC)O	6453725	71.07323:289664 82.44511:36812 86.09657:3892356 93.49374:31310 98.98437:216998 99.60885:32585 104.10703:510122 120.96631:262205 124.99995:2184669 141.49493:31011 157.22685:34394 158.38211:34505 164.00797:304076 184.07353:39196516 196.34708:33058 264.26962:82340 568.534:170365 590.51324:84116 688.49872:63201 713.59558:76192 731.60004:215889	673496	nd	nd	825525	nd	250953	nd	nd	nd	52407	nd	nd	nd	108836	nd	29533	nd	nd	nd	nd	nd	nd	nd	nd	nd	nd	50814	nd	nd	110543	nd	nd	nd
6.18_759.64	759.637	6.179	SM d38:1	Lipids and lipid-like molecules	Sphingolipids	Phosphosphingolipids	Phosphosphingolipids	sphingomyelins	1	CSH ESI+	[M+H]+	C43H87N2O6P	AADLTHQNYQJHQV-SVLGDMRNSA-N	CCCCCCCCCCCCCCCCCCCC(=O)N[C@@H](COP(=O)([O-])OCC[N+](C)(C)C)[C@@H](/C=C/CCCCCCCCCCCCC)O	44260124	71.07294:15295 76.72919:3156 81.07011:3777 86.09656:237573 87.21043:3831 88.11218:6609 95.0853:4511 97.05408:3191 98.98413:14243 104.10712:29677 120.9663:57911 122.2699:3746 124.99993:144427 160.35818:3572 164.00847:78291 174.75404:3966 184.07353:2732849 201.94455:7083 264.26874:4911 505.13168:3949 596.56781:28622 618.54523:44121 716.52557:32803 759.55511:54557	136773	nd	nd	304520	nd	56308	nd	nd	nd	nd	nd	28346	nd	69150	nd	nd	nd	nd	nd	nd	nd	nd	nd	nd	nd	nd	nd	nd	nd	nd	5766	nd	nd
7.13_789.70	789.696	7.128	SM d40:0	Lipids and lipid-like molecules	Sphingolipids	Phosphosphingolipids	Phosphosphingolipids	sphingomyelins	1	CSH ESI+	[M+H]+	C45H93N2O6P	FONAXCRWZQFJHY-JCGOJSMZSA-N	CCCCCCCCCCCCCCCCCCCCCC(=O)N[C@@H](COP(=O)([O-])OCC[N+](C)(C)C)[C@@H](CCCCCCCCCCCCCCC)O	44260132	70.04079:2774 71.07295:5486 79.4353:3569 83.13997:3139 86.0965:91036 98.98467:4454 104.10697:15763 113.24519:3404 124.99982:59656 177.95285:3130 184.07349:1149130 202.73827:10936 210.60124:3253 510.46048:6872 789.68054:15652	874363	9473	nd	575481	nd	24620	nd	nd	17148	nd	7751	5466	16813	nd	nd	46143	nd	nd	4913	54219	6179	76651	37670	161894	nd	33017	59584	1758970	2077057	65199	nd	82640	nd
7.21_801.68	801.685	7.215	SM d41:1	Lipids and lipid-like molecules	Sphingolipids	Phosphosphingolipids	Phosphosphingolipids	sphingomyelins	1	CSH ESI+	[M+H]+	C46H93N2O6P	SXZWBNWTCVLZJN-NMIJJABPSA-N	CCCCCCCCCCCCCCCCCCCCCCC(=O)N[C@@H](COP(=O)([O-])OCC[N+](C)(C)C)[C@@H](/C=C/CCCCCCCCCCCCC)O	46891684	71.07308:3576 73.24767:3598 86.0965:154575 86.10229:6841 94.61252:3361 98.98444:4338 104.10706:21966 124.99985:79761 127.3555:4193 129.31837:3744 147.59459:3725 184.07343:1617802 197.14169:4061 202.81703:4181 202.8349:6021 243.50487:3338 264.26761:5550 281.80551:3937 419.93445:3450 432.01614:3884 801.6861:6207	146159	nd	nd	289675	nd	84160	nd	nd	nd	nd	nd	29957	nd	66999	nd	nd	nd	nd	nd	nd	nd	nd	nd	nd	nd	nd	nd	nd	nd	nd	4237	2436	nd
7.79_817.72	817.716	7.788	SM d42:0	Lipids and lipid-like molecules	Sphingolipids	Phosphosphingolipids	Phosphosphingolipids	sphingomyelins	1	CSH ESI+	[M+H]+	C47H97N2O6P	SMJLGESYPKPRNU-CRCOQUFZSA-N	CCCCCCCCCCCCCCCCCCCCCCCC(=O)N[C@@H](COP(=O)([O-])OCC[N+](C)(C)C)[C@@H](CCCCCCCCCCCCCCC)O	44260134	71.0731:7641 80.22168:3167 84.11881:3216 84.4971:3367 86.09648:155926 98.98438:5249 104.10724:24004 124.99989:79151 174.67497:3765 184.07339:1657028 200.48012:3416 247.10196:3543 404.76703:3839 451.21268:3624 538.25623:20898 539.26477:70176 817.55719:56297 817.70178:29701	31607	nd	nd	123615	nd	13182	nd	nd	nd	nd	nd	9663	nd	6728	nd	nd	nd	nd	nd	nd	nd	nd	nd	nd	nd	nd	nd	nd	nd	nd	nd	nd	nd
6.28_811.67	811.669	6.281	SM d42:3	Organic nitrogen compounds	Organonitrogen compounds	Quaternary ammonium salts	Cholines	sphingomyelins	1	CSH ESI+	[M+H]+	C47H91N2O6P	TXFLWJQVQCDUDZ-BRUGZULGSA-N	CCCCCCCC/C=C\CCCCCCCCCCCCCC(=O)N[C@@H](COP(=O)([O-])OCC[N+](C)(C)C)[C@@H](/C=C/CCCCCCCC/C=C\CCC)O	52931215	86.09644:87120 98.98438:6033 104.10706:4614 124.99971:44743 184.07329:902532 202.7989:6186 239.07396:3919 283.03305:3123 340.55835:3332 377.59055:3890 395.0657:3322 410.65021:4182 417.8703:3947 763.7608:4693 811.66321:5521	2905	nd	nd	67494	nd	nd	nd	nd	nd	nd	nd	nd	nd	5349	nd	nd	nd	nd	nd	nd	nd	nd	nd	nd	nd	nd	nd	nd	nd	nd	3365	nd	nd
162	217	667922	sorbitol	Organic oxygen compounds	Organooxygen compounds	Carbohydrates and carbohydrate conjugates	Sugar alcohols	sugar alcohols	1	GCMS		C6H14O6	FBPFZTCFMRRESA-JGWLITMVSA-N	C([C@H]([C@H]([C@@H]([C@H](CO)O)O)O)O)O	5780	85:588.0 86:704.0 88:1768.0 89:8743.0 90:652.0 91:1094.0 92:168.0 93:127.0 94:89.0 97:2807.0 98:1048.0 99:1610.0 100:506.0 101:5089.0 102:848.0 103:48732.0 104:4923.0 105:2703.0 106:215.0 109:509.0 110:185.0 111:1108.0 112:146.0 113:1262.0 114:181.0 115:2342.0 116:957.0 117:28648.0 118:2694.0 119:2266.0 120:260.0 121:427.0 123:238.0 124:184.0 125:365.0 126:341.0 127:1107.0 129:20376.0 130:3176.0 …	257404	957096	393259	223851	7351	399285	20171	11320	48908	6921	1147671	121136	13616	332319	1493544	54072	3174	4091	138020	111831	8892	8246	323174	8422	40249	158826	13216	424075	4609	204834	739472	4488	69766
1714	144	792924	spermidine	Organic nitrogen compounds	Organonitrogen compounds	Amines	Secondary amines	biogenic polyamines	1	GCMS		C7H19N3	ATHGHQPFGPMSJY-UHFFFAOYSA-N	C(CCNCCCN)CN	1102	86:2249.0 87:97.0 88:90.0 98:50.0 99:209.0 100:1315.0 101:269.0 102:322.0 103:48.0 112:85.0 114:376.0 115:652.0 116:3899.0 117:324.0 118:176.0 123:24.0 126:189.0 128:490.0 129:447.0 130:615.0 131:43.0 132:12.0 140:80.0 142:727.0 144:4737.0 145:505.0 146:609.0 154:339.0 155:8.0 156:1970.0 157:646.0 158:219.0 159:4.0 160:1566.0 161:106.0 162:47.0 168:3.0 170:695.0 171:46.0 172:1272.0 173:230.0 174:…	1062	746	2094	1773	4688	353	2904	820	1989	1501	1599	414	1057	623	1886	2706	3544	2490	695	770	2911	2393	1331	3352	2069	1088	3208	858	2285	2623	1084	774	1098
6.94_203.22	203.223	6.943	Spermine	Organic nitrogen compounds	Organonitrogen compounds	Amines	Secondary amines	biogenic polyamines	1	HILIC ESI+	[M+H]+	C10H26N4	PFNFFQXMRSDOHW-UHFFFAOYSA-N	C(CCNCCCN)CNCCCN	1103	52.30723:2135 58.06542:34284 62.08699:2396 72.08083:32682 84.08086:42704 105.98325:2135 112.11207:530138 115.12312:3387 129.13852:852396 189.09851:2190 201.21492:4419 203.22307:189459	533618	172378	134563	1261152	210584	4215101	299366	293910	172268	457289	102497	133456	1692186	28606	231399	733406	96698	234898	220877	185529	304249	91297	206810	690057	2665666	12119978	744871	1188348	269349	48027	1292637	1016298	809720
1.60_173.08	173.081	1.601	Suberic acid	Lipids and lipid-like molecules	Fatty Acyls	Fatty acids and conjugates	Medium-chain fatty acids	dicarboxylic acids	1	HILIC ESI-	[M-H]-	C8H14O4	TYFQFVWCELRYAO-UHFFFAOYSA-N	C(CCCC(=O)O)CCC(=O)O	10457	52.75484:2772 52.86691:2855 56.59794:3290 57.03324:29855 59.01255:6491 71.56566:3081 83.04895:79007 83.82783:3707 84.44755:3568 109.06466:18491 111.08038:1873542 112.08359:14215 129.09109:102520 136.8618:18449 138.85933:4967 139.4687:3269 155.07056:13635 173.08122:1170882	472694	1178732	240164	191576	1056870	1783827	798261	398879	602251	635379	627239	1576605	1480020	260157	1068420	677951	655209	512357	945270	3772034	4311604	1791097	903447	870281	2726774	625802	8357171	216484	689588	1125178	213506	565011	492655
2226	113	297024	succinate semialdehyde	Lipids and lipid-like molecules	Fatty Acyls	Fatty acids and conjugates	Straight chain fatty acids	hydroxybutyrates	1	GCMS		C4H6O3	UIUJIQZEACWQSV-UHFFFAOYSA-N	C(CC(=O)O)C=O	1112	85:2046.0 86:2010.0 87:22.0 88:95.0 89:5734.0 90:577.0 91:1301.0 92:70.0 93:34.0 94:24.0 98:185.0 101:46.0 102:183.0 106:28.0 107:138.0 108:6.0 110:60.0 111:43.0 112:4.0 113:6334.0 114:548.0 115:18.0 116:75.0 117:16.0 118:87.0 119:38.0 120:7.0 127:42.0 128:91.0 129:228.0 130:177.0 131:240.0 132:11.0 135:1.0 137:5.0 139:8.0 142:46.0 143:20.0 145:269.0 147:30.0 149:101.0 152:8.0 154:42.0 155:2.0 15…	11729	8627	12918	7662	42194	2103	46734	6389	38674	29631	4440	4418	17596	9405	588	16628	5307	17458	9680	9843	6099	5638	3617	2128	3466	1160	83625	3980	14588	4607	1338	2571	15170
161	247	370608	succinic acid	Organic acids and derivatives	Carboxylic acids and derivatives	Dicarboxylic acids and derivatives	Dicarboxylic acids and derivatives	succinates	1	GCMS		C4H6O4	KDYFGRWQOYBRFD-UHFFFAOYSA-N	C(CC(=O)O)C(=O)O	1110	85:303.0 87:764.0 88:359.0 89:340.0 91:55.0 92:42.0 95:84.0 98:86.0 99:324.0 101:577.0 102:330.0 103:701.0 104:172.0 105:342.0 106:78.0 107:93.0 111:30.0 113:629.0 114:213.0 115:891.0 116:1231.0 117:1124.0 118:170.0 119:320.0 120:104.0 124:22.0 126:77.0 128:196.0 129:6064.0 130:1045.0 131:1466.0 132:345.0 133:2204.0 135:234.0 136:65.0 137:16.0 138:15.0 142:39.0 143:223.0 145:378.0 147:57887.0 148…	133343	21129	66238	8378	4763	57275	15287	34280	40171	37248	9672	9973	298109	268503	88788	44277	24041	34514	17476	49831	19013	50295	11679	14711	13004	33069	82311	162907	917084	63310	2890	18911	25793
173	271	915139	sucrose	Organic oxygen compounds	Organooxygen compounds	Carbohydrates and carbohydrate conjugates	Glycosyl compounds	sugars	1	GCMS		C12H22O11	CZMRCDWAGMRECN-UGDNZRGBSA-N	C([C@@H]1[C@H]([C@@H]([C@H]([C@H](O1)O[C@]2([C@H]([C@@H]([C@H](O2)CO)O)O)CO)O)O)O)O	5988	85:319.0 87:314.0 88:197.0 89:406.0 91:85.0 92:24.0 94:41.0 97:89.0 99:203.0 100:65.0 101:688.0 102:331.0 103:8357.0 104:731.0 105:421.0 108:21.0 109:428.0 110:53.0 111:276.0 112:52.0 113:277.0 114:83.0 115:331.0 116:305.0 117:1934.0 118:199.0 119:119.0 122:42.0 124:17.0 125:110.0 127:383.0 128:152.0 129:5742.0 130:735.0 131:1008.0 132:97.0 133:1861.0 134:253.0 135:207.0 136:48.0 138:21.0 139:138…	4131	1674	3094	2455	2198	15251	1976	677	594	950	1127	4724	15103	2993	1246	15365	2115	992	22209	627	587	728	671	749	913	2277	38881	1145	702	713	45110	1635	8486
1.40_197.04	197.045	1.401	Syringic acid	Benzenoids	Benzene and substituted derivatives	Benzoic acids and derivatives	Hydroxybenzoic acid derivatives	phenolic natural products	1	HILIC ESI-	[M-H]-	C9H10O5	JMSVCTWVEWCHDZ-UHFFFAOYSA-N	COC1=CC(=CC(=C1O)OC)C(=O)O	10742	50.31575:2258 83.7548:2065 106.29388:2199 109.02805:12594 121.02787:25802 123.00767:62541 134.86401:2658 138.01988:4163 138.03113:88791 153.01828:24288 153.05467:72229 153.09077:3494 160.28757:2090 162.83812:9554 166.99774:140345 182.02126:703462 197.04498:241105	171213	121179	1738	9241	33675	1159204	36760	186780	107948	171559	2120	267170	75095	17824	29349	84124	89462	141782	1040036	1254163	1416790	1175231	73758	90090	444609	165210	389146	5535	29805	29210	18290	92555	56792
124110	307	629499	tagatose	Organic oxygen compounds	Organooxygen compounds	Carbohydrates and carbohydrate conjugates	Monosaccharides	sugars	1	GCMS		C6H12O6	LKDRXBCSQODPBY-OEXCPVAWSA-N	C1[C@H]([C@@H]([C@@H](C(O1)(CO)O)O)O)O	439312	85:133.0 86:55.0 87:181.0 88:142.0 89:1043.0 90:163.0 91:49.0 93:67.0 94:44.0 95:37.0 97:94.0 99:85.0 100:189.0 101:225.0 102:181.0 103:8537.0 104:667.0 105:333.0 110:48.0 111:51.0 113:101.0 114:171.0 115:84.0 116:83.0 117:859.0 118:198.0 119:156.0 121:53.0 122:25.0 124:29.0 125:33.0 126:180.0 127:241.0 128:109.0 129:613.0 130:159.0 131:239.0 133:1163.0 134:285.0 135:74.0 138:28.0 139:22.0 142:70…	6357	1569	290	1237	1078	15938	1725	221	353	573	933	751	586	611	203	481	504	1413	343	1005	858	827	249	599	1447	993	2874	400	337	573	177	434	807
33985	292	534291	tartaric acid	Organic oxygen compounds	Organooxygen compounds	Carbohydrates and carbohydrate conjugates	Sugar acids and derivatives	dicarboxylic acids	1	GCMS		C4H6O6	FEWJPZIEWOKRBE-JCYAYHJZSA-N	[C@@H]([C@H](C(=O)O)O)(C(=O)O)O	444305	85:786.0 86:260.0 87:1086.0 88:349.0 89:901.0 92:63.0 93:424.0 94:1.0 95:68.0 99:1482.0 100:1220.0 101:976.0 102:12165.0 103:4411.0 104:950.0 105:569.0 106:327.0 108:144.0 109:72.0 110:289.0 111:252.0 112:49.0 113:1630.0 114:165.0 115:50.0 116:707.0 117:1725.0 118:257.0 119:1109.0 120:248.0 121:94.0 122:2.0 123:2.0 124:107.0 125:18.0 126:158.0 127:408.0 129:76.0 130:6556.0 131:6451.0 132:1626.0 1…	255761	197	3550	62551	455	1098214	474	129	216	713	166	162	504	83563	2481	6080	511	665	1023	368	738	404	992	389	436	273	1528	5262	6170	515	2207	297	414
7.80_124.01	124.006	7.804	Taurine	Organic acids and derivatives	Organic sulfonic acids and derivatives	Organosulfonic acids and derivatives	Organosulfonic acids	organosulfate	1	HILIC ESI-	[M-H]-	C2H7NO3S	XOAAWQZATWQOTB-UHFFFAOYSA-N	C(CS(=O)(=O)[O-])[NH3+]	1123	62.1848:1892 65.94025:1954 75.45641:1973 79.95609:68685 124.00629:109077	2473134	7638673	31314	7697	449498	1172663	663578	1078805	5399554	1396	731004	4473190	2015233	206161	411942	3655741	1620	3864	5550751	4118196	4564	2518	6165878	1717317	2007907	6520970	1505	2442341	3053318	3872541	362959	5011734	2418330
T-a-MCA			Tauro-a-Muricholic acid	Lipids and lipid-like molecules	Steroids and steroid derivatives	Bile acids, alcohols and derivatives	Taurinated bile acids and derivatives	conjugated bile acids	1	LC-MS/MS_BA		C26H45NO7S	XSOLDPYUICCHJX-OEYGYFRSSA-N	C[C@H](CCC(=O)NCCS(=O)(=O)O)[C@H]1CCC2[C@@]1(CCC3C2[C@H]([C@H]([C@H]4[C@@]3(CC[C@H](C4)O)C)O)O)C	168408	514.3 / 80	1013	140	721	889	7	566	12	49	19	nd	848	15	63	873	606	29	11	1199	108	4	11	nd	321	8	1	130	nd	735	576	31	86	2	10
TCDCA			Taurochenodeoxycholic acid	Lipids and lipid-like molecules	Steroids and steroid derivatives	Bile acids, alcohols and derivatives	Taurinated bile acids and derivatives	conjugated bile acids	1	LC-MS/MS_BA		C26H45NO6S	BHTRKEVKTKCXOH-BJLOMENOSA-N	C[C@H](CCC(=O)NCCS(=O)(=O)O)[C@H]1CC[C@@H]2[C@@]1(CC[C@H]3[C@H]2[C@@H](C[C@H]4[C@@]3(CC[C@H](C4)O)C)O)C	387316	498.3 / 80	185392	763	216041	420615	3	110432	102	4372	2873	nd	198719	169	85	380722	225387	316	nd	157	202	820	218	nd	1720	26	536	238	nd	25779	788	5697	9537	158	234
TCA			Taurocholic acid	Lipids and lipid-like molecules	Steroids and steroid derivatives	Bile acids, alcohols and derivatives	Hydroxy bile acids, alcohols and derivatives	conjugated bile acids	1	LC-MS/MS_BA		C26H45NO7S	WBWWGRHZICKQGZ-HZAMXZRMSA-N	C[C@H](CCC(=O)NCCS(=O)(=O)O)[C@H]1CC[C@@H]2[C@@]1([C@H](C[C@H]3[C@H]2[C@@H](C[C@H]4[C@@]3(CC[C@H](C4)O)C)O)O)C	6675	514.3 / 80	393714	5539	364068	661645	8	232157	287	11703	9037	7	431472	1362	651	605619	406827	2873	11	610	8783	3094	709	8	9884	310	1509	3238	9	356661	22122	16390	43167	2662	3203
TDCA			Taurodeoxycholic acid	Lipids and lipid-like molecules	Steroids and steroid derivatives	Bile acids, alcohols and derivatives	Taurinated bile acids and derivatives	conjugated bile acids	1	LC-MS/MS_BA		C26H45NO6S	AWDRATDZQPNJFN-VAYUFCLWSA-N	C[C@H](CCC(=O)NCCS(=O)(=O)O)[C@H]1CC[C@@H]2[C@@]1([C@H](C[C@H]3[C@H]2CC[C@H]4[C@@]3(CC[C@H](C4)O)C)O)C	2733768	498.3 / 80	172054	531	176146	343211	1	101546	45	2414	1267	nd	81142	110	61	306513	190764	199	nd	1034	200	401	166	10	1354	12	383	138	nd	59455	1893	2875	3700	91	227
TLCA			Taurolithocholic acid	Lipids and lipid-like molecules	Steroids and steroid derivatives	Bile acids, alcohols and derivatives	Taurinated bile acids and derivatives	conjugated bile acids	1	LC-MS/MS_BA		C26H45NO5S	QBYUNVOYXHFVKC-GBURMNQMSA-N	C[C@H](CCC(=O)NCCS(=O)(=O)O)[C@H]1CC[C@@H]2[C@@]1(CC[C@H]3[C@H]2CC[C@H]4[C@@]3(CC[C@H](C4)O)C)C	439763	482.3 / 80	4693	8	4341	9763	5	2323	nd	50	8	nd	1843	1	nd	9152	4251	nd	nd	953	6	6	nd	nd	180	nd	8	33	10	1302	57	98	22	nd	6
TUDCA			Tauroursodeoxycholic acid	Lipids and lipid-like molecules	Steroids and steroid derivatives	Bile acids, alcohols and derivatives	Taurinated bile acids and derivatives	conjugated bile acids	1	LC-MS/MS_BA		C26H45NO6S	BHTRKEVKTKCXOH-LBSADWJPSA-N	C[C@H](CCC(=O)NCCS(=O)(=O)O)[C@H]1CC[C@@H]2[C@@]1(CC[C@H]3[C@H]2[C@H](C[C@H]4[C@@]3(CC[C@H](C4)O)C)O)C	9848818	498.3 / 80	9796	249	8817	11184	nd	5135	2	173	132	11	12834	19	48	12064	7097	22	14	620	11	52	9	1	313	nd	21	17	nd	786	213	174	772	19	30
46252	295	612262	terephthalic acid	Benzenoids	Benzene and substituted derivatives	Benzoic acids and derivatives	Phthalic acid and derivatives	phthalic acids	1	GCMS		C8H6O4	KKEYFWRCBNTPAC-UHFFFAOYSA-N	C1=CC(=CC=C1C(=O)O)C(=O)O	7489	93:32.0 97:573.0 99:581.0 100:343.0 103:753.0 104:407.0 105:160.0 110:73.0 113:443.0 114:186.0 127:331.0 135:303.0 136:17.0 140:23.0 141:407.0 142:11.0 148:5.0 150:16.0 155:406.0 165:8.0 169:133.0 170:13.0 171:22.0 177:12.0 178:23.0 181:6.0 183:11.0 193:31.0 194:38.0 198:15.0 199:12.0 201:24.0 202:2.0 203:18.0 204:9.0 210:13.0 211:54.0 212:16.0 214:8.0 216:3.0 221:330.0 222:60.0 230:10.0 237:12.0…	15507	903	23591	4744	1835	2373	2398	265	434	12129	6685	1950	5115	11672	259	20830	19217	27313	3235	4864	5414	8087	1982	4052	7622	1278	24266	3046	1478	6793	782	1183	16273
9.65_740.68	740.676	9.652	TG 42:0	Lipids and lipid-like molecules	Glycerolipids	Triradylcglycerols	Triacylglycerols	saturated_triglycerides	1	CSH ESI+	[M+NH4]+	C45H86O6	DUXYWXYOBMKGIN-UHFFFAOYSA-N	CCCCCCCCCCCCCC(=O)OCC(COC(=O)CCCCCCCCCCCCC)OC(=O)CCCCCCCCCCCCC	11148	71.08161:3387 71.08574:77617 81.07001:56055 83.08566:22159 85.10129:51172 95.08567:90549 97.10129:20865 109.10136:53480 111.1172:23607 123.1169:23208 137.13229:7047 154.84724:3417 201.68826:7401 211.20589:65227 219.72215:3504 285.24341:4098 330.19479:3503 342.38193:3293 467.41132:28328 495.44122:640678 523.474:7046 528.68713:3336 651.82281:3854	166562	165107	174614	175814	274861	242320	179698	143711	366287	226315	210584	132342	178623	142028	250794	177637	211558	174606	131103	135133	167275	137266	178209	176583	174470	176606	113475	251845	162045	156135	1986275	132270	168567
8.67_736.64	736.645	8.672	TG 42:2	Lipids and lipid-like molecules	Glycerolipids	Triradylcglycerols	Triacylglycerols	unsaturated_triglycerides	1	CSH ESI+	[M+NH4]+	C45H82O6	IDWYMMYRNPSLDA-NNBKTNTFSA-N	CCCCCCCCCCCC(=O)OC[C@H](COC(=O)CCCCCCC/C=C\CCCCCC)OC(=O)CCCCCCC/C=C\CCCC	56937031	71.08553:18127 71.11306:2687 81.06987:30894 83.08566:13306 85.10126:15049 88.41528:3435 93.06976:3435 95.08564:51236 97.10123:6653 99.08012:3924 109.10138:35850 110.34755:2894 121.10126:3704 123.11703:16045 123.76865:2994 127.1117:3699 163.14735:4423 183.17421:18333 198.76187:3320 198.98407:6739 199.0054:11141 207.54333:2865 220.97955:3112 263.23639:6030 351.64114:2965 437.36172:27611 439.37793:1…	nd	nd	3314	nd	nd	nd	nd	nd	nd	nd	6983	nd	nd	2077	nd	nd	nd	nd	2748	nd	nd	3333	nd	5926	3297	5314	nd	nd	nd	3477	728889	2555	nd
10.15_768.71	768.708	10.151	TG 44:0	Lipids and lipid-like molecules	Glycerolipids	Triradylcglycerols	Triacylglycerols	saturated_triglycerides	1	CSH ESI+	[M+NH4]+	C47H90O6	UXWDTZNNQVHGSG-UHFFFAOYSA-N	CCCCCCCCCCCCCCCC(=O)OC(COC(=O)CCCCCCCCCCCCC)COC(=O)CCCCCCCCCCCCC		70.03211:2893 71.08549:7514 76.9342:3036 81.06982:6066 83.08538:3140 85.10108:3767 90.69044:2710 95.08556:15684 105.1282:2841 109.10123:5673 123.11702:3409 126.45599:2862 182.82164:3263 201.06818:12374 304.44199:3972 394.76602:3364 495.43741:35608 509.4545:4863 523.4715:38237 551.50604:6843 766.0451:3575	246293	260042	305839	286297	605636	435939	342159	249349	707723	464017	432255	266603	370983	266461	426220	365530	449257	366948	228197	276961	288536	251420	319471	344222	300550	320419	213766	419419	256193	255398	2259686	251616	327518
9.21_764.68	764.676	9.208	TG 44:2	Lipids and lipid-like molecules	Glycerolipids	Triradylcglycerols	Triacylglycerols	unsaturated_triglycerides	1	CSH ESI+	[M+NH4]+	C47H86O6	LJXSUVSRRMQRRA-WHTYERKGSA-N	CCCCCCCCCCCC(=O)OC[C@H](COC(=O)CCCCCCC/C=C\CCCCCC)OC(=O)CCCCCCC/C=C\CCCCCC	56936464	71.08556:17161 79.05408:4370 81.06992:43905 83.08578:21968 85.1011:14377 93.06996:5333 95.08554:50783 97.10119:13409 102.12784:80090 107.08498:4701 109.10124:40568 111.11679:3263 121.10133:15734 123.11695:6831 127.11167:22056 135.11696:12757 137.1321:3926 183.17328:11526 202.73503:4750 202.75319:6441 211.20639:3246 245.22708:3307 247.24315:4905 263.23795:5017 265.25262:14113 465.39346:130880 467.…	6092	10976	14863	11137	15211	6899	14439	9994	19374	6516	12040	7252	10759	16306	10703	5407	nd	10897	7278	10714	4064	8660	nd	10279	7362	5438	nd	21583	nd	6474	663144	11491	3842
10.22_794.72	794.723	10.224	TG 46:1	Lipids and lipid-like molecules	Glycerolipids	Triradylcglycerols	Triacylglycerols	unsaturated_triglycerides	1	CSH ESI+	[M+NH4]+	C49H92O6	RSDIQTNCDWUNDP-VHXPQNKSSA-N	CCCCCCCCCCCCCC(=O)OCC(COC(=O)CCCCCCC/C=C\CCCCCCCC)OC(=O)CCCCCCCCCCCCC	11764207	71.08565:186575 79.05431:30980 81.06998:215236 83.08565:155689 85.06495:8462 85.10126:150994 88.11228:5237 93.07003:36412 95.08563:357976 97.09455:6558 97.10128:125906 97.1084:5336 99.08031:5532 99.11705:7778 107.08537:24763 109.10127:216637 111.08047:6563 111.11695:56719 113.13266:5153 116.19568:3987 117.28792:4295 121.10122:78779 123.11703:77864 125.13264:7411 127.11247:3791 135.11659:63394 137…	277277	304633	340662	334775	609329	484367	408642	280372	881821	540546	461551	282193	400565	329665	468751	430361	504332	405310	283049	284146	334072	289703	384945	364902	346431	369398	284711	534815	323125	325230	2374061	357478	365111
9.73_797.66	797.663	9.729	TG 46:2	Lipids and lipid-like molecules	Glycerolipids	Triradylcglycerols	Triacylglycerols	unsaturated_triglycerides	1	CSH ESI+	[M+Na]+	C49H90O6	XUEMVUXNOCIHLG-MOFPORNTSA-N	CCCCCCCCCCCCCC(=O)OC[C@H](COC(=O)CCCCCCC/C=C\CCCCCC)OC(=O)CCCCCCC/C=C\CCCCCC	56936582	71.08564:7191 81.07008:19896 82.79744:3332 83.08549:5318 84.44835:3187 85.10133:5241 95.08558:20575 109.10114:6784 138.16736:3848 193.91167:3304 202.71085:6760 208.30376:3363 237.52524:2906 263.58655:3119 274.17111:3452 383.00067:3949 495.44162:6619 517.42413:6908 519.44287:4651 541.42273:12111 547.47784:5048 569.4552:7598 575.5033:6430 597.48608:12595 797.66333:496575	5190	7099	3215	3961	20321	nd	7451	nd	28454	1774	nd	nd	nd	4594	nd	nd	nd	nd	nd	6198	5260	nd	nd	4628	11560	nd	3530	11781	nd	10148	133597	654	5029
11.04_824.77	824.77	11.038	TG 48:0	Lipids and lipid-like molecules	Glycerolipids	Triradylcglycerols	Triacylglycerols	saturated_triglycerides	1	CSH ESI+	[M+NH4]+	C51H98O6	PVNIQBQSYATKKL-UHFFFAOYSA-N	CCCCCCCCCCCCCCCC(=O)OCC(COC(=O)CCCCCCCCCCCCCCC)OC(=O)CCCCCCCCCCCCCCC	11147	71.08568:67262 81.07006:56405 83.08556:48635 85.10117:61289 95.0856:82345 97.10135:28676 98.36911:3523 105.83586:3803 109.1015:40088 111.11676:6365 123.11649:25740 131.2827:3975 137.13274:7343 144.53539:3652 146.82909:3394 163.41992:3224 211.20509:4812 239.23677:38108 241.61501:3650 304.17188:5202 313.27338:3827 523.4718:65610 537.48737:19979 551.50299:489551 565.51843:24016 579.53424:44096	787705	812530	885740	766199	2461613	1404718	1367065	778188	2767895	2980279	1375089	733832	1070532	673169	1533595	1113543	1369882	1153449	634059	715297	873418	706972	993393	1103117	817908	851794	714728	1175838	1167795	843616	3763508	791656	1018237
10.22_820.74	820.739	10.217	TG 48:2	Lipids and lipid-like molecules	Glycerolipids	Triradylcglycerols	Triacylglycerols	unsaturated_triglycerides	1	CSH ESI+	[M+NH4]+	C51H94O6	RUOVJPPUXXFZPC-YZEIBMOJSA-N	CCCCCCCCCCCCCCCC(=O)OC[C@H](COC(=O)CCCCCCC/C=C\CCCCCC)OC(=O)CCCCCCC/C=C\CCCCCC	9543987	71.08565:50877 79.05421:19839 81.06998:108045 83.08563:76548 85.06441:3643 85.10126:41625 88.11178:3694 93.06993:31464 95.07899:6704 95.08561:158840 97.06448:4846 97.10138:57756 107.08566:13645 109.10117:92289 111.08016:4108 111.11727:23799 121.10133:46853 123.1168:33969 135.11682:43903 137.13234:16329 139.11247:3509 140.05258:3415 149.13243:20560 151.14806:6233 163.14838:5572 165.16351:3519 183.…	113108	122462	130382	126361	243953	214285	144659	105754	401995	179256	179673	113223	139099	136725	174693	174023	190104	149175	104015	92705	125403	111297	145605	161836	132816	136753	115327	181144	108546	126600	1649861	134446	141178
9.76_818.72	818.723	9.759	TG 48:3	Lipids and lipid-like molecules	Glycerolipids	Triradylcglycerols	Triacylglycerols	unsaturated_triglycerides	1	CSH ESI+	[M+NH4]+	C51H92O6	SKGWNZXOCSYJQL-BUTYCLJRSA-N	CCCCCC/C=C\CCCCCCCC(=O)OCC(OC(=O)CCCCCCC/C=C\CCCCCC)COC(=O)CCCCCCC/C=C\CCCCCC	9543989	71.0857:38450 79.05439:26586 81.0647:3298 81.06998:153352 83.0856:67223 85.10134:34047 91.05442:8702 93.06992:40771 95.08566:159617 97.10115:42348 105.06985:6461 107.08561:20159 109.10131:97320 111.07979:4856 111.11704:16702 119.08595:5460 120.13728:3451 121.10152:44882 123.11673:42287 133.10147:14007 135.11674:35366 137.1329:13160 147.11723:5979 149.13313:19290 151.14926:7552 153.12706:4051 161.…	6389	nd	5299	nd	nd	nd	4692	nd	nd	5382	nd	4007	nd	3777	nd	nd	nd	nd	1286	3037	2790	921	nd	5682	nd	11135	11382	nd	8224	nd	324956	nd	nd
11.43_852.80	852.802	11.432	TG 50:0	Lipids and lipid-like molecules	Glycerolipids	Triradylcglycerols	Triacylglycerols	saturated_triglycerides	1	CSH ESI+	[M+NH4]+	C53H102O6	MARPCPMDFOPPJX-UHFFFAOYSA-N	CCCCCCCCCCCCCCCCCC(=O)OCC(COC(=O)CCCCCCCCCCCCCCCCC)OC(=O)CCCCCCCCCCCCC	545588	70.87069:3515 71.08563:88638 81.06992:63630 83.08559:47267 85.10123:70346 95.08552:104552 97.10117:44077 108.34267:3415 109.10115:60280 111.11666:13802 123.11723:28140 125.13301:5398 137.01724:4269 137.13239:8502 151.14909:4369 176.51413:3274 191.30061:3694 200.71924:5981 200.73769:6504 239.23743:37975 267.26807:14275 313.2738:5244 428.86334:3376 551.50323:290241 565.51874:4475 566.17932:3640 579…	414303	475660	506237	435279	1954913	704131	979727	511006	2121380	3788488	771566	384095	604989	352330	1009641	618212	869111	702568	332770	382099	502442	359979	569130	570323	438059	437097	416647	672746	928432	461569	2339463	466375	571110
11.06_850.79	850.786	11.057	TG 50:1	Lipids and lipid-like molecules	Glycerolipids	Triradylcglycerols	Triacylglycerols	unsaturated_triglycerides	1	CSH ESI+	[M+NH4]+	C53H100O6	YHMDGPZOSGBQRH-YYSBDVFPSA-N	CCCCCCCCCCCCCCCC(=O)OC[C@H](COC(=O)CCCCCCC/C=C\CCCCCCCC)OC(=O)CCCCCCCCCCCCCCC	25240460	71.08568:89917 75.51852:3458 79.05431:7580 81.06993:96946 81.07484:5972 83.08056:5676 83.08564:88406 85.06437:4748 85.10129:85439 93.06985:7410 95.08562:151706 97.1014:60695 107.08554:7655 109.10127:78608 111.11714:24137 121.10112:31826 122.95481:3656 123.11686:35933 123.91272:3957 135.11676:34982 137.13283:18225 147.02303:3388 149.13266:7305 151.14804:7159 159.84801:3619 163.1485:4235 165.1628:4…	451007	448197	466519	464565	961736	842856	577577	391927	1519030	1497498	845167	390206	608267	429740	696275	619635	805416	601185	429826	379230	500413	413365	528840	775924	488759	549714	411454	803476	447990	493358	15453768	482762	578211
10.67_848.77	848.77	10.668	TG 50:2	Lipids and lipid-like molecules	Glycerolipids	Triradylcglycerols	Triacylglycerols	unsaturated_triglycerides	1	CSH ESI+	[M+NH4]+	C53H98O6	QEZWFCZNHWUARW-XQCAQTCHSA-N	CCCCCCCCCCCCCCCCCC(=O)OC[C@@H](COC(=O)CCCCCCC/C=C\CCCCCC)OC(=O)CCCCCCC/C=C\CCCCCC	9544010	71.08554:18995 71.09023:3063 72.31926:3354 79.05443:3373 81.06991:34845 83.08556:16561 84.1752:3201 85.10107:12649 87.90894:3487 93.0698:7299 95.08559:43241 97.10118:18076 107.0853:4920 109.10108:20317 111.11697:6486 113.70817:3359 121.10104:16230 121.34877:3243 123.11664:13769 135.11644:7101 149.13246:5052 163.56345:3357 198.49454:3737 202.7267:3811 202.74345:4158 265.25226:4262 313.2728:4609 54…	213815	329994	387520	334322	680601	554768	318380	221716	840205	544172	394150	304448	313449	265609	328837	474989	380141	318563	364315	300931	331005	295750	428036	482467	368388	292051	236204	372127	300866	281489	13588028	401664	306475
10.25_846.75	846.755	10.248	TG 50:3	Lipids and lipid-like molecules	Glycerolipids	Triradylcglycerols	Triacylglycerols	unsaturated_triglycerides	1	CSH ESI+	[M+NH4]+	C53H96O6	UFHNZOACKFBCOM-YXKNDSBASA-N	CCCCCCCC/C=C\CCCCCCCC(=O)OC[C@@H](COC(=O)CCCCCCC/C=C\CCCCCC)OC(=O)CCCCCCC/C=C\CCCCCC	25240357	71.08575:25948 73.33179:3153 79.05428:20179 81.06996:84802 83.08563:36083 85.1011:18732 91.05418:3875 93.07018:23940 95.08572:91958 97.1012:33958 100.69125:3306 107.08538:13699 109.10119:49277 111.08073:3495 111.11688:8129 118.0269:3849 119.08578:3717 121.10096:33227 123.11671:22316 133.10115:5866 135.11707:29238 137.13254:12551 147.11644:5662 149.13216:13328 163.14763:7669 203.83644:4599 237.220…	22395	14895	48200	19999	22750	31632	23939	35575	20887	24398	22899	27234	6335	24630	23745	18250	34176	9524	28325	16761	20129	14865	16597	46261	21766	5734	21525	23193	13879	22621	3739570	32173	29786
9.84_844.74	844.739	9.842	TG 50:4	Lipids and lipid-like molecules	Glycerolipids	Triradylcglycerols	Triacylglycerols	unsaturated_triglycerides	1	CSH ESI+	[M+NH4]+	C53H94O6	PVMBAGXWHHZKFP-JMPJWMFJSA-N	CCCCCC/C=C\CCCCCCCC(=O)OC[C@H](COC(=O)CCCCCCC/C=C\C/C=C\CCCCC)OC(=O)CCCCCCC/C=C\CCCCCC	25240359	71.08569:24721 79.05434:20398 81.07001:104766 81.49368:3476 82.01801:4000 83.08567:21500 85.10133:20486 91.05473:7011 93.06994:22493 95.08566:95192 97.10141:21835 105.06991:5978 107.08569:23730 107.95101:3528 109.10139:49193 111.08138:3278 111.11682:4523 119.08563:8539 121.10134:23101 123.11694:32640 133.10147:12399 135.11714:17847 137.13275:16951 147.11642:4679 149.13304:6938 161.1333:6400 163.1…	nd	nd	nd	3042	11516	nd	nd	nd	nd	nd	nd	nd	nd	3369	nd	nd	nd	nd	nd	nd	nd	nd	nd	nd	nd	nd	nd	nd	nd	nd	546643	nd	nd
11.25_864.80	864.802	11.247	TG 51:1	Lipids and lipid-like molecules	Glycerolipids	Triradylcglycerols	Triacylglycerols	unsaturated_triglycerides	1	CSH ESI+	[M+NH4]+	C54H102O6	OZAXLAGNPZMZAD-BOEMPQCLSA-N	CCCCCCCCCCCCCCCCC(=O)OC[C@H](COC(=O)CCCCCCC/C=C\CCCCCCC)OC(=O)CCCCCCCCCCCCCCCC	9544006	71.08562:37427 71.45794:3286 81.07006:47390 83.08557:37595 85.10123:28007 88.11225:16840 95.08572:64343 97.10139:32623 107.08475:4259 109.10151:39933 111.11716:13094 121.10139:14568 123.117:18720 135.11729:6281 137.13281:6003 149.13338:4264 202.69879:5201 202.71771:5599 214.01553:3504 265.25342:4862 281.10889:3297 346.73544:3482 370.92075:3403 563.50238:89847 565.41931:4652 565.51904:145830 577.5…	115571	121688	113340	141978	261796	235160	157674	103521	467652	276500	221617	115216	150501	114412	182295	166528	220995	179590	103626	93250	137942	124252	164760	179902	138253	147949	128275	208674	103762	131627	568563	135051	169546
10.86_862.79	862.785	10.86	TG 51:2	Lipids and lipid-like molecules	Glycerolipids	Triradylcglycerols	Triacylglycerols	unsaturated_triglycerides	1	CSH ESI+	[M+NH4]+	C54H100O6	NSNSZGBCOIKUBU-SZOKBDNISA-N	CCCCCCCCCCCCCCCCC(=O)OC[C@H](COC(=O)CCCCCCC/C=C\CCCCCCC)OC(=O)CCCCCCC/C=C\CCCCCCC	9544013	71.08573:57125 79.05428:18423 81.07007:102422 83.08572:54664 85.10137:41306 91.05408:5644 93.07005:15595 95.08565:112634 97.10146:47878 107.08567:14711 109.10146:62108 111.11677:14963 121.10134:33813 123.11722:38135 135.11722:26051 137.13274:17817 149.13229:17879 151.14842:4338 239.23647:14120 247.24295:5745 251.23666:5833 253.25273:5040 263.23682:6880 265.25211:16610 304.13141:8127 313.27347:712…	146726	nd	16345	11648	18964	29465	4985	nd	443369	14186	250797	nd	10706	nd	170641	191198	191198	35721	nd	34342	27421	119324	20645	186157	148490	185939	nd	225940	105318	10449	660895	17244	122157
10.48_860.77	860.77	10.481	TG 51:3	Lipids and lipid-like molecules	Glycerolipids	Triradylcglycerols	Triacylglycerols	unsaturated_triglycerides	1	CSH ESI+	[M+NH4]+	C54H98O6	ISSGPXMQOMAFMJ-DMGKHJLRSA-N	CCCCCCC/C=C\CCCCCCCC(=O)OCC(OC(=O)CCCCCCC/C=C\CCCCCCC)COC(=O)CCCCCCC/C=C\CCCCCCC	9544023	71.08588:15837 74.27135:3342 79.05422:12818 81.07006:45957 83.08583:29239 85.10125:13703 86.86287:3634 91.10046:3006 93.0703:11555 95.08576:49200 97.10111:24113 107.08561:3945 108.90146:3189 109.10148:32474 121.10165:16224 122.20257:3771 123.11684:8369 135.11736:14328 149.13321:3875 151.14787:4842 153.12694:3960 197.77563:21311 197.79532:6799 225.22052:4475 239.23526:4343 245.22449:3906 263.23853…	50651	8443	46833	27580	44773	35113	72846	24694	117625	27912	9577	24041	70982	52086	20312	23908	115431	15995	12811	23541	42039	21761	35503	67634	59716	28696	33081	83907	11498	21815	285699	55717	15806
10.09_858.75	858.755	10.085	TG 51:4	Lipids and lipid-like molecules	Glycerolipids	Triradylcglycerols	Triacylglycerols	unsaturated_triglycerides	1	CSH ESI+	[M+NH4]+	C54H96O6	IIRQXNVLAXQEKB-KBEZCZBDSA-N	CCCCCCCC/C=C\CCCCCCCC(=O)OC[C@@H](COC(=O)CCCCCCC/C=C\CCCCCC)OC(=O)CCCCCCC/C=C\C/C=C\CCCC	9544052	71.08569:50741 79.05422:43548 80.43781:4160 81.06998:204492 82.94:3669 83.04845:4419 83.08571:49164 85.10111:32236 91.05439:23239 93.06991:47194 95.08558:201112 97.06473:6648 97.10106:33913 98.24509:3640 105.07008:22164 107.08562:37402 109.10133:109785 111.08064:6119 111.11684:6865 119.08553:18514 121.10133:46416 123.11681:67064 129.9333:3617 133.10146:26717 135.11694:24574 137.13257:23101 147.11…	nd	3239	4333	nd	nd	8049	6525	nd	nd	nd	nd	nd	nd	nd	nd	nd	nd	nd	nd	nd	nd	nd	nd	nd	nd	4492	nd	nd	nd	3882	88923	nd	nd
11.79_885.79	885.788	11.792	TG 52:0	Lipids and lipid-like molecules	Glycerolipids	Triradylcglycerols	Triacylglycerols	saturated_triglycerides	1	CSH ESI+	[M+Na]+	C55H106O6	SDNYRTVJOFMYIW-OIVUAWODSA-N	CCCCCCCCCCCCCCCCCC(=O)OC[C@@H](COC(=O)CCCCCCCCCCCCCCC)OC(=O)CCCCCCCCCCCCCCCCC	545690	71.07379:4357 71.08568:138478 74.28618:4161 75.6404:4586 81.07:76223 83.08553:62013 85.1012:110195 94.84628:4642 95.07896:6606 95.08563:127961 95.09241:6042 97.1011:51274 109.10136:79237 111.11701:29689 123.11674:37354 137.1329:8494 151.14818:5874 184.47357:5208 201.90222:10153 203.72107:4443 239.23741:22062 267.26941:25089 333.74585:5693 579.53503:315209 582.55408:5369 601.51715:317872 607.26056…	35525	15493	26407	39445	170912	64201	58882	39415	128454	571651	54564	21126	35009	12978	127332	54825	57650	56916	16448	28242	50030	20298	37179	46131	25815	30273	35292	53969	61167	39634	130664	51579	40975
11.45_878.82	878.817	11.448	TG 52:1	Lipids and lipid-like molecules	Glycerolipids	Triradylcglycerols	Triacylglycerols	unsaturated_triglycerides	1	CSH ESI+	[M+NH4]+	C55H104O6	NPCZZYKITFKRQZ-RFBIWTDZSA-N	CCCCCCCCCCCCCCCCCC(=O)OC(COC(=O)CCCCCCCCCCCCCCC)COC(=O)CCCCCCC/C=C\CCCCCCCC	5365005	71.08553:30046 81.06999:40807 83.08539:24811 85.10112:31245 93.06982:5488 95.08552:43126 97.10105:32807 109.10115:22581 111.11671:5106 121.10124:14309 123.11669:14372 135.11694:6164 137.13252:4329 161.43652:3545 178.04468:3215 200.49448:8238 200.51442:6293 205.95164:4234 239.23587:7587 265.25409:5978 313.27341:4644 549.48657:5585 551.5036:14558 577.51898:97674 579.53418:94712 591.53595:15413 605.…	231531	203748	228173	202252	473324	364908	286867	206840	808204	1320852	358550	184593	296967	201498	328371	285412	363154	294311	170410	188556	224016	187862	273289	386596	229247	258532	195787	347657	240750	260183	5069075	236464	291465
11.07_876.80	876.802	11.066	TG 52:2	Lipids and lipid-like molecules	Glycerolipids	Triradylcglycerols	Triacylglycerols	unsaturated_triglycerides	1	CSH ESI+	[M+NH4]+	C55H102O6	TXMWKTABZBAJCW-QLHBUVOUSA-N	CCCCCCCCCCCCCCCCCCCC(=O)OC[C@@H](COC(=O)CCCCCCCCCCCCC)OC(=O)CCCCCCC/C=C\C/C=C\CCCCC	56938176	71.08576:6133 72.77903:3271 81.06997:22819 83.08567:21362 85.10136:5885 91.17327:3848 93.07028:4636 95.08561:29903 97.1012:15883 109.10204:11592 112.4119:3796 121.10132:5004 123.11669:5340 127.2184:3637 135.11737:8055 202.74071:7120 204.81682:3889 239.2379:4173 265.25195:8324 409.18735:3860 515.36725:3817 549.50195:3726 575.50806:5661 577.52008:144051 603.53326:85014 605.54132:3921 648.35718:3825	350555	325627	351292	342617	626451	562929	421736	315524	961044	634925	586206	299793	408464	356729	498621	478736	582927	458038	424157	270263	417518	308065	392601	2261068	351675	419803	321328	489555	313373	366317	64592115	449969	443632
10.69_874.79	874.786	10.694	TG 52:3	Lipids and lipid-like molecules	Glycerolipids	Triradylcglycerols	Triacylglycerols	unsaturated_triglycerides	1	CSH ESI+	[M+NH4]+	C55H100O6	DQXQIWIQYYEGLG-MMWLGPPDSA-N	CCCCCCCCCCCCCC(=O)OC[C@H](COC(=O)CCCCCCCCC/C=C\CCCCCCCC)OC(=O)CCCCCCC/C=C\C/C=C\CCCCC	56938177	71.08567:4001812 78.04055:136786 79.05436:2404383 81.06999:12941508 82.84588:156539 83.08565:6499788 85.06487:309681 85.10127:3166828 91.0544:1213094 93.07001:3114246 95.08564:13930226 97.06488:261097 97.1014:4101676 99.08074:323326 105.06978:758993 107.08546:2412314 109.10129:7459484 111.08128:431680 111.11695:1699976 113.09594:146972 119.08578:1008306 121.10131:4568102 123.11674:3594762 125.132…	174592	146108	204445	156056	287969	251577	205800	166122	476676	247637	251900	144109	204219	178582	233556	212276	261025	224794	396900	148604	196153	144807	184553	1779925	174498	184279	145896	202534	158297	181605	47497723	267942	186528
10.32_872.77	872.771	10.318	TG 52:4	Lipids and lipid-like molecules	Glycerolipids	Triradylcglycerols	Triacylglycerols	unsaturated_triglycerides	1	CSH ESI+	[M+NH4]+	C55H98O6	WHSWXEYWNPTUPW-HNJDVRDNSA-N	CCCCCCCC/C=C\CCCCCCCC(=O)O[C@H](COC(=O)CCCCCCC/C=C\CCCCCC)COC(=O)CCCCCCC/C=C\C/C=C\CCCCC	25240364	71.0856:15312 74.51163:3404 79.05441:17851 81.06995:77307 83.0858:25758 85.10123:13817 91.05449:5102 91.75853:3402 93.06985:21730 95.08557:70596 97.06461:4117 97.10085:17889 106.14754:3815 107.08575:13169 109.10132:36250 110.53435:3558 119.08616:4153 121.10128:19339 123.11712:27902 133.10085:6884 135.11639:16113 137.13283:7023 147.11693:5574 157.67021:3182 161.13187:4045 163.1488:4634 175.14893:4…	30365	36992	50073	45660	88367	47016	41199	31935	48203	52639	49753	40156	50195	57754	50512	69303	70928	46735	239730	39132	62360	40639	25966	547759	47133	60027	40074	26003	27224	47313	16976804	155420	70739
9.95_870.75	870.754	9.948	TG 52:5	Lipids and lipid-like molecules	Glycerolipids	Triradylcglycerols	Triacylglycerols	unsaturated_triglycerides	1	CSH ESI+	[M+NH4]+	C55H96O6	CQZAAIKPSLHIBC-KDJOUNIJSA-N	CCCCCC/C=C\CCCCCCCC(=O)OC[C@H](COC(=O)CCCCCCC/C=C\C/C=C\CCCCC)OC(=O)CCCCCCC/C=C\C/C=C\CCCCC	25240366	71.0492:6339 71.08572:115751 79.05441:184300 81.07:485368 83.04905:9891 83.08563:139204 85.10135:83080 91.05445:90738 93.06382:10270 93.07005:226044 95.04907:13388 95.08566:459741 97.06492:20922 97.10129:71533 99.08047:12645 99.11643:5926 102.12787:65952 103.13138:8853 105.06999:79371 107.08572:134916 109.10136:264342 111.08068:8412 111.11687:9559 117.06953:25675 119.08566:79019 121.10135:185148 …	nd	nd	3869	nd	nd	nd	4741	nd	nd	nd	nd	nd	nd	nd	nd	nd	nd	nd	3029	nd	nd	nd	nd	70316	nd	nd	nd	nd	nd	nd	4380071	17602	nd
11.26_890.82	890.818	11.26	TG 53:2	Lipids and lipid-like molecules	Glycerolipids	Triradylcglycerols	Triacylglycerols	unsaturated_triglycerides	1	CSH ESI+	[M+NH4]+	C56H104O6	RSINITWKVQRWSZ-RFVLVDBCSA-N	CCCCCCCCCCCCCCCCCC(=O)OC[C@@H](COC(=O)CCCCCCC/C=C\C/C=C\CCCC)OC(=O)CCCCCCCCCCCCCCCCC	9544102	71.08565:19283 79.05449:5776 81.07004:40373 83.07139:3424 83.08555:29104 85.10114:14317 86.17274:3478 93.06982:5839 95.08563:53051 97.10132:27726 107.0857:8214 109.10146:31597 111.11662:6430 121.10142:20853 123.11681:8068 135.11691:23672 137.1328:3896 149.13289:6008 163.14899:4050 192.13268:3487 201.35793:14638 247.24361:5091 251.87766:3919 253.25009:3839 265.25311:21415 291.84927:3681 414.61942:…	41370	41432	51247	71038	54929	56969	62617	37055	162328	60744	77804	33805	23253	42731	47222	51927	49319	62839	45582	17867	60586	43409	70153	97426	49565	56201	34315	98220	55834	27191	522900	54621	21508
10.11_889.73	889.726	10.106	TG 53:5	Lipids and lipid-like molecules	Glycerolipids	Triradylcglycerols	Triacylglycerols	unsaturated_triglycerides	1	CSH ESI+	[M+Na]+	C56H98O6	QHYAATSKYBYSLG-BXDFBOBBSA-N	CCCCCCC/C=C\CCCCCCCC(=O)OC[C@H](COC(=O)CCCCCCC/C=C\C/C=C\CCCCC)OC(=O)CCCCCCC/C=C\C/C=C\CCCCC	9544183	74.65471:5040 75.01352:3651 79.05438:22336 81.07004:112556 83.08575:28669 87.59312:4336 91.05479:13423 91.74751:3722 93.07009:24948 95.08568:94457 97.10144:24155 105.06998:7105 107.08575:21272 109.10118:43190 111.11714:5079 115.37543:4632 119.086:4359 121.10177:27797 123.11707:19915 133.10155:15972 135.11728:28160 137.13431:3791 147.11678:8369 149.13316:7109 161.13239:8548 185.88861:3592 201.6192…	nd	nd	nd	nd	nd	nd	nd	nd	nd	nd	nd	nd	nd	nd	nd	nd	nd	nd	nd	nd	nd	nd	nd	nd	nd	nd	nd	nd	nd	nd	12882	nd	nd
11.81_906.85	906.849	11.81	TG 54:1	Lipids and lipid-like molecules	Glycerolipids	Triradylcglycerols	Triacylglycerols	unsaturated_triglycerides	1	CSH ESI+	[M+NH4]+	C57H108O6	YFFIQXNTTVSKJC-NZEOUKRFSA-N	CCCCCCCCCCCCCCCCCC(=O)OC[C@H](COC(=O)CCCCCCC/C=C\CCCCCCCC)OC(=O)CCCCCCCCCCCCCCCCC	16058371	71.08573:26157 78.18717:3576 81.06971:27992 83.08559:14089 85.10116:19202 95.0857:32950 97.10133:18153 109.10117:26048 111.1169:3870 121.10105:6235 123.11713:8690 137.13228:3998 175.3708:3501 180.47786:4009 197.44437:28170 252.67668:4553 521.45233:6301 549.48956:4379 577.51813:16617 605.54803:61764 607.56586:38057 621.58362:8606 633.57697:35467 635.59711:27928 647.59674:5300 661.61121:8598 817.51…	144218	132795	161335	141010	367935	283056	214514	139667	479923	789969	258979	130548	201401	124570	229812	221496	286322	224987	107089	140299	142279	116856	177134	240254	145914	193589	154686	252715	140726	160574	1665790	138874	197828
11.45_904.83	904.834	11.453	TG 54:2	Lipids and lipid-like molecules	Glycerolipids	Triradylcglycerols	Triacylglycerols	unsaturated_triglycerides	1	CSH ESI+	[M+NH4]+	C57H106O6	WUUWGORPQFKFQN-XDVOZUNOSA-N	CCCCCCCCCCCCCCCCCCCCCC(=O)OC[C@@H](COC(=O)CCCCCCCCCCCCC)OC(=O)CCCCCCC/C=C\C/C=C\CCCCC	56938183	71.08559:209537 79.05429:60892 81.06998:383971 83.07995:6215 83.08558:185617 85.06457:6827 85.09577:8680 85.10126:178584 88.11208:42494 91.05424:27762 93.06995:78228 95.04933:5371 95.0856:454100 97.06494:7480 97.10128:152714 99.07998:7485 99.117:11333 102.12805:7517 105.07026:7468 107.08561:52648 109.10126:246499 111.08068:8066 111.11681:57793 118.22051:4751 119.08589:21869 121.10118:80638 123.11…	125363	105132	123244	113212	229568	209900	145875	104191	397167	234490	202492	100653	157667	105968	187709	165117	198608	169561	110818	99611	146328	92294	140594	621142	116092	144953	103769	200516	119251	128079	12836914	132021	150368
11.07_902.82	902.818	11.071	TG 54:3	Lipids and lipid-like molecules	Glycerolipids	Triradylcglycerols	Triacylglycerols	unsaturated_triglycerides	1	CSH ESI+	[M+NH4]+	C57H104O6	PHYFQTYBJUILEZ-IUPFWZBJSA-N	CCCCCCCC/C=C\CCCCCCCC(=O)OCC(OC(=O)CCCCCCC/C=C\CCCCCCCC)COC(=O)CCCCCCC/C=C\CCCCCCCC	5497163	71.04916:17944 71.08565:142947 75.5946:9283 79.05438:204153 81.07001:844535 83.08561:675110 85.0647:51694 85.07063:9697 85.10139:104050 91.05436:36439 93.07005:288559 95.08565:990691 97.06477:55592 97.1013:539442 99.08031:18381 99.11656:10366 107.08565:236077 109.10131:523103 111.08047:82040 111.117:241886 113.096:24311 115.7832:9871 121.10136:600020 123.11684:235812 125.09651:20693 125.13271:231…	330248	308558	354978	307005	715606	575253	424981	375154	993199	592275	544777	317297	449237	342588	505004	501475	517695	469010	372849	269513	436306	314945	380712	8035800	373853	405695	299291	496145	330402	375742	152113658	398870	420177
10.71_900.80	900.802	10.711	TG 54:4	Lipids and lipid-like molecules	Glycerolipids	Triradylcglycerols	Triacylglycerols	unsaturated_triglycerides	1	CSH ESI+	[M+NH4]+	C57H102O6	BRLGHZXETDWABO-NOFIOOQLSA-N	CCCCCCCCCCCCCCCCCC(=O)OC[C@H](COC(=O)CCCCCCC/C=C\C/C=C\C/C=C\CC)OC(=O)CCCCCCC/C=C\CCCCCCCC	9544255	70.87862:11943 71.04886:20469 71.08147:13954 71.08559:196331 71.13796:8969 79.05428:218071 81.06998:1076615 83.08565:409747 85.06453:20562 85.10105:176510 91.04103:9245 91.05438:123421 93.06998:310964 95.0856:1043244 97.06474:51680 97.10122:293612 99.08048:42917 105.07027:75203 107.08561:234321 109.10127:505524 111.08035:43110 111.11703:119243 113.09618:12836 119.08533:105073 121.10125:317744 122…	135343	132124	147172	118891	250322	196880	181217	194601	435987	182078	219355	135897	192934	135505	190999	198347	204154	191927	351726	110249	158679	123561	163892	9643056	137699	197210	140538	172988	153092	153952	114936443	224717	163992
10.34_898.79	898.786	10.336	TG 54:5	Lipids and lipid-like molecules	Glycerolipids	Triradylcglycerols	Triacylglycerols	unsaturated_triglycerides	1	CSH ESI+	[M+NH4]+	C57H100O6	OEJXMJPFOHYSIU-GRLFFVHSSA-N	CCCCCCCC/C=C\CCCCCCCC(=O)OC[C@H](COC(=O)CCCCCCC/C=C\C/C=C\C/C=C\CC)OC(=O)CCCCCCC/C=C\CCCCCCCC	9544294	77.92148:3180 79.05429:6629 81.06972:29820 83.08554:7125 84.30134:3784 91.05405:4236 91.68832:3725 93.06991:13966 95.0854:28817 97.1011:8548 102.12768:772665 103.12389:5503 103.13102:97794 107.01662:3518 107.0854:8220 109.10124:24234 121.10107:18876 123.11623:3903 135.11647:14664 149.13202:3275 163.14729:3982 261.22177:17243 265.25275:6991 304.14688:19116 339.2897:5675 357.60529:3820 483.77466:37…	34607	36878	45054	54063	70267	44503	55998	66326	98850	64848	85509	49133	39390	59674	81698	55213	78613	37631	211697	39983	61905	42380	55878	5096713	42433	84179	49124	67122	21734	44323	64455812	119286	43358
9.94_896.77	896.771	9.942	TG 54:6	Lipids and lipid-like molecules	Glycerolipids	Triradylcglycerols	Triacylglycerols	unsaturated_triglycerides	1	CSH ESI+	[M+NH4]+	C57H98O6	HBOQXIRUPVQLKX-BBWANDEASA-N	CCCCC/C=C\C/C=C\CCCCCCCC(=O)OCC(OC(=O)CCCCCCC/C=C\C/C=C\CCCCC)COC(=O)CCCCCCC/C=C\C/C=C\CCCCC	5322095	77.08482:3159 78.03046:3843 79.05436:7998 81.06988:39536 83.0855:7505 91.05446:5885 93.06976:14894 95.08533:32103 107.08574:13451 109.10123:16485 121.10119:14171 133.1017:7390 135.11716:13458 147.11658:4272 149.37909:3818 176.43068:3790 202.73341:8830 204.85432:4301 215.88138:3630 247.27263:3929 261.2215:5333 263.23584:14911 337.27493:4104 558.45038:3613 560.64557:4987 597.48932:23990 599.50153:1…	7874	4092	13453	6781	26796	14365	15899	14282	33653	nd	6289	8939	16004	34884	19251	19326	nd	7687	174933	9149	36084	18895	12622	1480332	14731	21376	8275	14708	17328	32947	27421851	131496	10678
9.56_894.75	894.755	9.559	TG 54:7|TG 18:2_18:2_18:3	Lipids and lipid-like molecules	Glycerolipids	Triradylcglycerols	Triacylglycerols	unsaturated_triglycerides	1	CSH ESI+	[M+NH4]+	C57H96O6	NGPHUAVENUDDAO-UHFFFAOYSA-N	O=C(OCC(OC(=O)CCCCCCCC=CCC=CCCCCC)COC(=O)CCCCCCCC=CCC=CCCCCC)CCCCCCCC=CCC=CCC=CCC		71.04916:9450 71.08549:7457 79.05436:205166 81.07001:541245 83.04884:6251 83.08558:103214 85.06486:9438 85.10136:5541 91.0544:113530 93.07004:275962 95.04921:11455 95.08565:483137 95.20642:5589 97.06481:25750 97.07183:4280 97.10139:66096 99.08044:11329 105.04475:5540 105.07004:98164 107.0857:199169 109.06516:5006 109.10136:256479 111.08078:22298 111.11691:7819 111.5103:4801 113.09678:5637 117.069…	nd	nd	nd	nd	nd	nd	nd	4130	nd	nd	nd	2653	nd	nd	6690	nd	nd	nd	3123	2761	4847	nd	nd	248684	nd	nd	nd	nd	nd	nd	8785477	33397	nd
11.64_918.85	918.849	11.644	TG 55:2	Lipids and lipid-like molecules	Glycerolipids	Triradylcglycerols	Triacylglycerols	unsaturated_triglycerides	1	CSH ESI+	[M+NH4]+	C58H108O6	MUFCUKYUWCAVNZ-OUKSQGAOSA-N	CCCCCCCCCCCCCCCCCCCCC(=O)O[C@H](COC(=O)CCCCCCCCCCC)COC(=O)CCCCCCCCCCC/C=C\C/C=C\CCCCC	56937436	71.08575:33044 79.05414:5742 81.07005:57166 83.08561:26218 85.10138:29159 93.07027:4761 95.08571:59808 97.10095:18320 102.12794:4414 107.08602:3922 109.10138:35325 111.11666:7689 121.10157:4391 123.11652:18704 133.10088:5096 135.11723:4244 137.1329:4982 143.41699:3960 149.13171:6879 230.93874:4373 245.22729:3815 253.87772:3708 254.95857:3723 263.23709:16635 265.25339:4539 338.38351:3626 523.80359…	7448	6145	10236	20468	9352	10590	7650	3637	42287	19486	25368	8073	21055	7689	17021	20893	24065	16107	3112	3392	8088	9144	5533	24299	12378	4796	7459	nd	12085	6098	87580	13861	1342
11.26_916.83	916.833	11.255	TG 55:3	Lipids and lipid-like molecules	Glycerolipids	Triradylcglycerols	Triacylglycerols	unsaturated_triglycerides	1	CSH ESI+	[M+NH4]+	C58H106O6	YFTFKGRPESIBQI-FNRWURKDSA-N	CCCCCCCCCCCCCCCCCCCCCC(=O)OC[C@@H](COC(=O)CCCCCCC/C=C\C/C=C\C/C=C\CC)OC(=O)CCCCCCCCCCCCCC		71.08549:8449 79.0543:7957 79.14024:3345 81.06997:64684 83.08575:33953 85.10113:8726 85.8664:3696 86.56303:4227 87.48567:3583 93.07001:22483 95.08553:73559 97.1014:33910 107.08573:15509 109.10134:35319 111.11708:22517 121.10127:27966 123.11692:18110 125.132:4203 135.10655:3893 135.11623:29771 135.80074:3545 137.1315:4758 149.13274:7742 192.17889:3619 261.2583:5711 263.23599:4531 265.25323:16385 2…	nd	nd	nd	nd	nd	nd	4675	nd	nd	nd	9781	nd	nd	nd	nd	nd	nd	nd	nd	nd	nd	nd	nd	18250	nd	nd	nd	9506	nd	5164	396758	nd	nd
12.01_934.88	934.88	12.011	TG 56:1	Lipids and lipid-like molecules	Glycerolipids	Triradylcglycerols	Triacylglycerols	unsaturated_triglycerides	1	CSH ESI+	[M+NH4]+	C59H112O6	OCYFAHIHWCVZKS-FHSLLVMSSA-N	CCCCCCCCCCCCCCCCCCCC(=O)OC[C@@H](COC(=O)CCCCCCCCCCCCCCCCC)OC(=O)CCCCCCC/C=C\CCCCCCCC	9544345	71.0858:62791 79.05465:7287 81.07001:83010 83.08569:57694 85.0654:5080 85.10119:47007 88.11224:20952 93.07011:7842 95.08569:114894 97.10125:47110 107.08601:16309 109.1014:57115 111.11723:24402 121.10143:22762 123.11703:27212 135.1169:29885 137.13327:9312 149.13286:5486 151.14845:7279 163.14824:5176 216.94963:3773 239.23744:7509 265.25394:24776 295.54886:3933 434.93991:4788 535.47382:6047 549.4876…	153564	139787	161304	149795	219470	323122	176059	122792	519527	302708	245832	119977	215279	132647	190940	219850	258442	240261	110013	106514	127960	122630	147320	225354	174293	197426	133760	252354	109752	161288	637743	160845	198947
11.81_932.86	932.865	11.81	TG 56:2	Lipids and lipid-like molecules	Glycerolipids	Triradylcglycerols	Triacylglycerols	unsaturated_triglycerides	1	CSH ESI+	[M+NH4]+	C59H110O6	PDEQUPGHMOMBFC-FYEHETCMSA-N	CCCCCCCCCCCCCCCCCCCC(=O)OC[C@@H](COC(=O)CCCCCCCCCCCCCCCCC)OC(=O)CCCCCCC/C=C\C/C=C\CCCCC	9544390	71.04946:5235 71.08565:132469 74.28885:4156 79.05436:52779 81.07:293341 83.08566:224127 85.06477:9406 85.10132:107309 86.38711:4159 91.05416:10475 93.06996:71304 95.08563:344880 97.06502:8893 97.10133:195704 99.08053:16813 99.11697:6687 107.08582:52256 109.10132:186262 111.08064:15693 111.11694:94423 112.24858:3942 121.10128:138393 123.11694:86575 125.09554:5878 125.1325:25233 127.11198:5569 135.…	43510	31172	32742	41116	91031	82585	48497	28120	183714	76308	82489	39824	67603	46089	47252	67103	60860	52174	34721	31916	39715	30270	50114	137834	34091	50425	25503	77895	35537	41382	3999577	45164	63317
11.49_951.78	951.778	11.486	TG 56:3	Lipids and lipid-like molecules	Glycerolipids	Triradylcglycerols	Triacylglycerols	unsaturated_triglycerides	1	CSH ESI+	[M+K]+	C59H108O6	QXMHHXQBBKDSSL-BAQZNRHJSA-N	CCCCCCCC/C=C\CCCCCCCCCC(=O)OC[C@@H](COC(=O)CCCCCCC/C=C\CCCCCCCC)OC(=O)CCCCCCC/C=C\CCCCCCCC	9544447	74.42269:4389 88.11227:45665 89.11526:6451 94.75925:3645 99.92043:3798 140.84473:3664 202.74759:4015 202.76729:6421 266.24969:3789 304.63818:3965 883.77856:44239 951.77911:148776	nd	nd	nd	nd	nd	nd	nd	nd	nd	nd	nd	nd	nd	nd	nd	nd	nd	nd	2385	nd	nd	nd	nd	83615	nd	nd	nd	nd	nd	nd	599847	nd	nd
11.10_928.83	928.832	11.096	TG 56:4	Lipids and lipid-like molecules	Glycerolipids	Triradylcglycerols	Triacylglycerols	unsaturated_triglycerides	1	CSH ESI+	[M+NH4]+	C59H106O6	YONCDTJKIZDSKQ-IYASBODOSA-N	CCCCCCCC/C=C\CCCCCCCCCC(=O)OC[C@@H](COC(=O)CCCCCCC/C=C\CCCCCCCC)OC(=O)CCCCCCC/C=C\C/C=C\CCCCC	25240379	71.0492:5702 71.08566:116715 79.05434:105628 80.82751:4564 81.07:512312 83.04913:6671 83.08563:191684 85.0649:9734 85.10126:91019 91.05436:54944 93.07004:137945 95.04931:8131 95.08566:539198 97.06464:17980 97.10136:143665 99.08041:23330 105.06979:49394 107.08566:109726 109.10131:279811 111.08045:19503 111.11692:56384 113.09648:8645 119.08572:47790 121.10133:139178 123.10739:6631 123.11699:159659 …	6077	nd	nd	nd	nd	nd	nd	3386	nd	8063	nd	nd	nd	3287	nd	nd	nd	nd	2284	nd	4984	nd	nd	325482	6897	4633	nd	nd	3844	nd	4785552	4856	nd
10.75_926.82	926.817	10.748	TG 56:5	Lipids and lipid-like molecules	Glycerolipids	Triradylcglycerols	Triacylglycerols	unsaturated_triglycerides	1	CSH ESI+	[M+NH4]+	C59H104O6	UHEJWASONFIROS-YPSHDQQVSA-N	CCCCCCCC/C=C\CCCCCCCCCC(=O)OC[C@@H](COC(=O)CCCCCCC/C=C\C/C=C\CCCCC)OC(=O)CCCCCCC/C=C\C/C=C\CCCCC	25240380	71.08572:9108 71.22759:3710 71.87622:4314 75.93597:4104 79.05423:41868 81.06992:109328 83.08555:58861 85.1013:22933 91.05437:23408 93.07008:55982 95.08555:84418 97.10133:48769 102.12774:1948432 103.12547:8856 103.1311:217268 105.06982:9995 107.08535:46818 109.10129:61817 111.11709:8429 116.83105:4854 119.08585:9622 121.10125:72752 123.11685:27958 131.08565:7349 133.1011:9947 135.11664:56953 137.1…	nd	nd	4704	nd	nd	nd	nd	nd	nd	nd	nd	nd	nd	nd	nd	nd	nd	nd	nd	nd	nd	nd	nd	120740	nd	nd	nd	nd	nd	nd	2754043	nd	nd
11.94_946.88	946.88	11.936	TG 57:2	Lipids and lipid-like molecules	Glycerolipids	Triradylcglycerols	Triacylglycerols	unsaturated_triglycerides	1	CSH ESI+	[M+NH4]+	C60H112O6	OQPANTOJGGHRCB-OEIGHXOUSA-N	CCCCCCCCCCCCCCCCCCCC(=O)OC[C@@H](COC(=O)CCCCCCC/C=C\C/C=C\CCCC)OC(=O)CCCCCCCCCCCCCCCCCCC		71.08562:27462 79.05437:5338 81.06995:44935 83.08553:26998 85.10141:17988 88.11225:4513 93.07006:5698 95.08557:52183 97.10131:25099 99.04952:3844 102.12791:5546 107.0856:4296 109.10152:29935 111.11759:5268 119.08598:4339 121.10098:6128 123.11707:18010 135.11635:5477 147.11522:3932 162.07199:4027 180.96718:4418 202.74342:7307 263.23694:6587 369.35391:4873 547.47272:4294 575.50446:84556 589.5213:83…	47036	26384	38213	49333	78475	78683	56794	32781	114981	85676	76340	30273	59521	48649	55969	68669	94981	72780	25773	29208	36332	39571	69921	nd	53847	58911	45600	79209	10732	46206	154603	47054	66899
12.11_962.91	962.912	12.114	TG 58:1	Lipids and lipid-like molecules	Glycerolipids	Triradylcglycerols	Triacylglycerols	unsaturated_triglycerides	1	CSH ESI+	[M+NH4]+	C61H116O6	OWZMHFAFGQCCNI-FBXRAONGSA-N	CCCCCCCCCCCCCCCCCCCC(=O)OC[C@@H](COC(=O)CCCCCCC/C=C\CCCCCCCC)OC(=O)CCCCCCCCCCCCCCCCCCC	25240381	71.08558:123818 79.0542:24696 81.06486:6977 81.06995:154871 83.08559:125895 85.1013:101521 88.11182:6294 93.06988:27152 95.08558:208083 97.10131:110735 99.11658:6566 102.12782:7373 107.08555:21853 109.10128:109506 111.11687:45609 111.12401:5365 121.10143:44884 123.11679:44165 125.13258:9359 135.11682:45416 137.13251:17321 139.11153:5949 149.13252:25720 151.14774:17285 153.12741:6426 165.16383:514…	103590	91314	105764	101574	140200	224586	120362	94653	352325	188462	205283	80593	148103	96409	131315	143810	225268	179695	76321	76567	109618	106018	134101	141022	120303	120273	90496	193504	56123	135399	336037	109752	138026
12.00_960.90	960.896	12.004	TG 58:2	Lipids and lipid-like molecules	Glycerolipids	Triradylcglycerols	Triacylglycerols	unsaturated_triglycerides	1	CSH ESI+	[M+NH4]+	C61H114O6	NFQQJRGJJVQGAV-MEADVOAOSA-N	CCCCCCCCCCCCCCCCCCCCCC(=O)O[C@H](COC(=O)CCCCCCCCCCCCC)COC(=O)CCCCCCCCCCC/C=C\C/C=C\CCCCC	56938341	71.08575:40764 79.05419:15801 81.07007:88568 83.08559:65085 85.10122:34044 93.07005:28977 93.31876:3941 95.08562:117551 97.10127:53429 99.08024:4257 102.12809:5246 107.0856:16613 109.10126:55895 111.11726:28900 121.10139:38847 123.11674:33196 125.13269:7034 135.1169:30386 137.13239:9324 149.13255:17285 161.31604:4071 165.16356:6594 177.21599:4381 196.56712:14828 196.58968:30765 247.24223:15211 26…	64257	64004	60395	77455	65581	131017	96832	77051	220314	91416	113462	54372	50199	64509	62525	85870	107037	96570	57083	52400	68694	67271	57362	159096	80797	90557	62304	116980	33049	78412	2356170	70452	103340
11.83_958.88	958.88	11.827	TG 58:3	Lipids and lipid-like molecules	Glycerolipids	Triradylcglycerols	Triacylglycerols	unsaturated_triglycerides	1	CSH ESI+	[M+NH4]+	C61H112O6	RFMSTHTUAZETPD-JJPHLYBUSA-N	CCCCCCCC/C=C\CCCCCCCCCC(=O)OC[C@@H](COC(=O)CCCCCCC/C=C\CCCCCCCC)OC(=O)CCCCCCCCC/C=C\CCCCCCCC	9544748	71.08584:45131 79.05438:26922 81.06485:7989 81.07001:145071 83.08573:74391 85.10125:39973 91.05408:9928 93.07007:37296 95.08568:147081 97.10148:54105 98.34425:3855 99.08031:7708 99.11679:5931 100.45345:3880 107.08552:26067 109.10133:83661 111.11678:20342 119.0852:4570 121.1013:31204 123.11674:40680 133.10149:9939 135.11697:32083 137.13231:17782 147.11807:5908 149.13266:20125 151.14867:9885 153.12…	8768	nd	nd	nd	nd	nd	nd	5536	nd	7792	nd	3995	6275	nd	nd	12439	9662	nd	nd	3181	nd	nd	nd	68865	nd	8367	3934	7982	nd	nd	1345558	3768	6303
11.55_956.87	956.865	11.547	TG 58:4	Lipids and lipid-like molecules	Glycerolipids	Triradylcglycerols	Triacylglycerols	unsaturated_triglycerides	1	CSH ESI+	[M+NH4]+	C61H110O6	CCKRHDUCFMOBKX-AAINFQTBSA-N	CCCCCCCCCCCCCCCCCCCC(=O)O[C@H](COC(=O)CCCCCCCCCCCCCCCCC)COC(=O)CCC/C=C\C/C=C\C/C=C\C/C=C\CCCCC	9544835	71.04891:30086 71.08565:552260 79.05434:461498 81.06996:2304496 81.07521:86583 83.08559:536772 85.0646:42778 85.10121:477126 91.05435:263953 93.06997:616435 95.04857:25422 95.08561:2176281 95.09232:86240 97.06422:83899 97.10123:470199 99.07951:93238 105.07022:199944 105.07737:28146 107.08564:447043 109.10128:1147577 111.07986:33120 111.11678:203951 113.09566:39210 119.08571:231015 121.10131:44138…	nd	nd	nd	nd	nd	nd	nd	nd	nd	nd	nd	nd	nd	2232	nd	nd	nd	nd	nd	nd	nd	nd	nd	nd	nd	nd	nd	nd	nd	nd	581825	nd	nd
11.14_954.85	954.848	11.139	TG 58:5	Lipids and lipid-like molecules	Glycerolipids	Triradylcglycerols	Triacylglycerols	unsaturated_triglycerides	1	CSH ESI+	[M+NH4]+	C61H108O6	ZXJSFJWAZMQHIU-NSKHXVOISA-N	CCCCCCCCCCCCCCCCCCCCCC(=O)O[C@H](COC(=O)CCCCCCCCCCCCC)COC(=O)CCCCC/C=C\C/C=C\C/C=C\C/C=C\C/C=C\CC	56938344	71.08585:14349 79.0545:50036 81.07003:110953 83.08558:67895 85.10123:6020 91.05421:9336 93.07017:56710 95.08567:116661 95.65201:3860 97.10141:47199 102.12689:4026 105.06998:14531 107.08559:45120 108.10048:3972 109.10143:60034 111.11684:24079 116.52865:4463 117.06988:6861 119.08564:14061 121.10126:73707 123.11697:31753 131.08615:5064 132.56505:3675 133.10098:8966 135.11696:50329 137.13239:6724 141…	nd	nd	nd	nd	nd	nd	nd	nd	nd	nd	nd	nd	nd	nd	nd	nd	nd	nd	nd	nd	nd	nd	nd	nd	nd	nd	nd	nd	nd	nd	109275	nd	nd
12.07_974.91	974.912	12.066	TG 59:2	Lipids and lipid-like molecules	Glycerolipids	Triradylcglycerols	Triacylglycerols	unsaturated_triglycerides	1	CSH ESI+	[M+NH4]+	C63H118O6	ONQVFVNCAXIZPA-OEIGHXOUSA-N	CCCCCCCCCCCCCCCCCCCC(=O)OC[C@H](COC(=O)CCCCCCCCC/C=C\CCCCCCCC)OC(=O)CCCCCCCCC/C=C\CCCCCCCC		70.59736:4068 71.08566:43785 77.86475:3457 79.05443:16036 81.07004:61666 83.08553:31566 85.10139:33047 88.11211:6390 93.07011:19310 95.08562:87835 97.10141:32290 107.08573:7184 109.10123:41277 111.11703:8276 119.08571:4934 121.10136:19804 123.11713:20700 135.11714:21988 137.13219:5652 149.13278:6229 174.20137:4120 200.33197:20025 211.18292:3999 233.0435:4712 263.23816:6768 265.25256:4914 265.9096…	35452	34844	39184	39950	14164	87666	20638	28994	67238	42618	35352	29721	34820	25426	33521	58417	69902	71845	20383	20254	35348	41148	45283	nd	41008	58304	35323	77564	9114	66866	240061	31836	15274
11.94_972.90	972.896	11.94	TG 59:3	Lipids and lipid-like molecules	Glycerolipids	Triradylcglycerols	Triacylglycerols	unsaturated_triglycerides	1	CSH ESI+	[M+NH4]+	C62H114O6	GFWCWSZOZVIVJH-ZIURWEIWSA-N	CCCCCCCCCCCCCCCCCCCC(=O)O[C@H](COC(=O)CCCCCCCCCCCCCCCCCC)COC(=O)CCCCCC/C=C\C/C=C\C/C=C\CCCCC		71.08577:28736 79.05435:16877 81.06998:72092 83.08566:39060 85.10133:17641 88.11232:38116 93.0698:22217 95.08567:75211 97.1011:30208 104.80466:3980 106.14054:4297 107.08586:17360 109.10126:42831 111.11703:5582 121.10132:19545 123.11687:22231 135.11693:19187 137.13264:16986 149.13239:15739 161.1324:4705 164.61301:4051 201.76973:8273 230.47272:3977 263.23691:8866 265.25415:8376 293.39746:4634 313.6…	nd	nd	nd	7103	22507	nd	nd	nd	nd	nd	nd	nd	nd	4451	6882	nd	nd	10131	4825	nd	nd	nd	nd	nd	nd	nd	5721	7091	nd	nd	138796	nd	nd
12.01_986.91	986.912	12.012	TG 60:3	Lipids and lipid-like molecules	Glycerolipids	Triradylcglycerols	Triacylglycerols	unsaturated_triglycerides	1	CSH ESI+	[M+NH4]+	C63H116O6	IJOXAPFYWITIHW-KUBXGBLDSA-N	CCCCCCCCCCCCCCCCCCCCCC(=O)O[C@H](COC(=O)CCCCCCCCCCCCCCC)COC(=O)CCCCCCCC/C=C\C/C=C\C/C=C\CCCCC		71.08556:90665 79.05423:57286 81.06997:265453 83.08561:123610 83.0909:6690 85.10126:78987 91.05442:21104 93.07005:70588 95.08562:299046 95.09254:10160 97.06499:10668 97.10131:97618 99.08052:8132 102.1279:18932 105.07005:17529 107.08553:49355 109.10124:171924 109.10931:7486 111.08073:8477 111.1168:50750 113.98865:4307 119.08559:18961 121.10127:90670 123.11667:90313 125.13201:7850 127.11077:4417 13…	6701	3822	7751	3689	12148	17067	6693	4127	nd	nd	9373	nd	nd	4802	6464	5301	11684	7223	7349	3222	3987	4331	nd	51028	4099	5969	3766	16117	nd	nd	1124045	6074	5201
11.86_984.90	984.896	11.862	TG 60:4	Lipids and lipid-like molecules	Glycerolipids	Triradylcglycerols	Triacylglycerols	unsaturated_triglycerides	1	CSH ESI+	[M+NH4]+	C63H114O6	WECVQMVSEHWZQR-ULZSGHTGSA-N	CCCCCCCCCCCCCCCCCCCC(=O)OC[C@H](COC(=O)CCC/C=C\C/C=C\C/C=C\C/C=C\CCCCC)OC(=O)CCCCCCCCCCCCCCCCCCC		71.08564:319646 79.05441:219488 81.06998:1138440 81.0751:54394 81.07738:38359 83.0486:14801 83.08559:288639 85.06422:18381 85.10123:236026 91.05435:131183 92.5968:8587 93.07001:293677 93.07633:14610 95.04858:11835 95.0856:1068457 97.06422:34212 97.10125:244448 99.0797:35458 99.11597:13327 105.06982:106183 107.08557:210909 109.1013:534124 111.07977:43106 111.11679:87991 113.09551:17307 117.06978:8…	nd	nd	nd	nd	nd	nd	nd	nd	nd	nd	nd	nd	nd	nd	nd	nd	nd	nd	nd	nd	nd	nd	nd	6327	nd	nd	nd	nd	nd	nd	255733	nd	nd
11.51_982.88	982.88	11.51	TG 60:5	Lipids and lipid-like molecules	Glycerolipids	Triradylcglycerols	Triacylglycerols	unsaturated_triglycerides	1	CSH ESI+	[M+NH4]+	C63H112O6	DTHQVLKUDRJNSH-QBKRSDIPSA-N	CCCCCCCCCCCCCCCCCCCC(=O)OC[C@H](COC(=O)CCCCCC/C=C\C/C=C\C/C=C\CCCCC)OC(=O)CCCCCCCCC/C=C\C/C=C\CCCCC	9545275	71.08559:32988 79.0545:95645 81.07:206736 83.04933:5007 83.08569:143117 85.06473:8580 85.1011:21442 91.05428:40522 93.07001:131418 93.0895:4708 95.079:8480 95.08568:227011 95.09251:9239 97.06443:4353 97.10134:124941 97.95174:4181 99.08011:7616 102.60607:4454 105.04476:4720 105.0701:30808 107.08557:83627 109.10135:126716 109.27354:4254 111.08075:5528 111.117:42337 117.07011:16083 119.08596:37973 1…	nd	nd	nd	nd	nd	nd	nd	nd	nd	nd	nd	nd	nd	nd	nd	nd	nd	nd	nd	nd	nd	nd	nd	nd	nd	nd	nd	nd	nd	nd	257129	nd	nd
12.15_1002.94	1002.94	12.151	TG 61:2|TG 25:0_18:1_18:1	Lipids and lipid-like molecules	Glycerolipids	Triradylcglycerols	Triacylglycerols	unsaturated_triglycerides	1	CSH ESI+	[M+NH4]+	C64H120O6	BXAOOQRMIBMCHI-UHFFFAOYSA-N	O=C(OCC(OC(=O)CCCCCCCC=CCCCCCCCC)COC(=O)CCCCCCCCCCCCCCCCCCCCCCCC)CCCCCCCC=CCCCCCCCC		71.08574:67999 79.05438:30802 81.0648:7184 81.06999:138442 83.08569:118144 85.10136:59329 88.11234:18653 93.07001:41182 95.08566:185730 97.10136:102312 107.08557:26698 109.1014:105978 111.08059:4684 111.11712:50604 113.13274:4899 121.10138:73976 123.1167:47069 125.13267:9989 135.11723:76361 137.13254:18268 139.11229:5325 149.13197:31861 151.14819:8926 153.12724:5677 163.14867:6355 165.09119:7408 …	nd	7788	14509	4432	nd	17958	nd	6049	nd	11581	9243	14372	8179	10825	19784	16283	22646	6960	5562	9459	15228	10584	11713	nd	14807	13403	4020	14986	nd	6077	112822	21292	7826
12.19_1016.96	1016.96	12.189	TG 62:2	Lipids and lipid-like molecules	Glycerolipids	Triradylcglycerols	Triacylglycerols	unsaturated_triglycerides	1	CSH ESI+	[M+NH4]+	C65H122O6	KWGDKWYPTTYCLC-DEGBXDRHSA-N	CCCCCCCCCCCCCCCCCCCCCC(=O)O[C@H](COC(=O)CCCCCCCCCCCCCCCCC)COC(=O)CCCCCCCCCCC/C=C\C/C=C\CCCCC	9545831	71.08561:59876 79.05424:32243 81.07002:165242 83.08556:126690 85.06499:5743 85.10118:57268 88.11229:8122 93.07007:50931 95.08563:181453 97.10136:103670 107.08598:29613 109.10126:104783 111.11668:45445 121.10131:82527 123.11656:51988 125.13274:8424 125.9011:3800 135.11699:66043 137.13289:17247 149.132:31709 151.14857:21239 163.14804:9663 165.16393:8639 190.04689:4894 202.64572:15309 247.24255:2827…	7860	7237	7637	4169	11114	11939	nd	3455	nd	17499	7182	nd	nd	8255	nd	6064	nd	nd	4301	6971	4113	5273	5682	25601	8353	6095	11028	16290	nd	6448	113179	17943	nd
12.03_1012.93	1012.93	12.028	TG 62:4	Lipids and lipid-like molecules	Glycerolipids	Triradylcglycerols	Triacylglycerols	unsaturated_triglycerides	1	CSH ESI+	[M+NH4]+	C65H118O6	AHXIACCOHSVLRP-ULZSGHTGSA-N	CCCCCCCCCCCCCCCCCCCC(=O)OC[C@H](COC(=O)CCCCC/C=C\C/C=C\C/C=C\C/C=C\CCCCC)OC(=O)CCCCCCCCCCCCCCCCCCC		71.08566:66057 79.05434:61048 79.37987:4423 81.07001:308597 83.04974:4881 83.0856:94970 85.0647:8809 85.10127:64983 91.05426:45062 93.07:81823 95.08563:270947 97.0644:4754 97.10122:69218 99.08064:5138 105.07013:35411 107.08568:48027 107.3691:5235 109.10134:151242 111.08005:7104 111.11691:32423 113.09635:5747 119.08563:31971 121.10117:73218 123.11689:77715 125.09542:5703 125.13271:8153 133.10117:4…	nd	nd	nd	nd	nd	nd	nd	nd	nd	nd	nd	nd	nd	nd	nd	nd	nd	nd	nd	nd	nd	nd	nd	nd	nd	nd	nd	nd	nd	nd	102223	nd	nd
1.57_179.06	179.057	1.575	Theophylline	Organoheterocyclic compounds	Imidazopyrimidines	Purines and purine derivatives	Xanthines	phenolic natural products	1	HILIC ESI-	[M-H]-	C7H8N4O2	ZFXYFBGIUFBOJW-UHFFFAOYSA-N	CN1C2=C(C(=O)N(C1=O)C)NC=N2		51.12906:1819 52.13476:1951 59.41828:2273 63.17401:1853 69.08128:2287 71.01273:3633 104.15542:1861 107.04893:10361 107.06018:9050 122.03503:21636 127.61565:2335 133.70552:2450 135.04424:56796 135.05525:8835 135.08008:4419 137.0231:30877 139.11234:2527 140.04512:2714 151.03896:15440 155.13298:2182 164.02095:2055 164.033:80357 179.03479:94867 179.05647:788794	911289	1135035	514853	723123	716899	1734021	222905	435158	504903	552959	541205	780727	842114	771006	761154	639783	858018	765386	465542	624861	927851	479615	585388	615906	749213	602583	1136658	14189	635593	561962	429795	477895	493307
770	217	467595	threitol	Organic oxygen compounds	Organooxygen compounds	Carbohydrates and carbohydrate conjugates	Sugar alcohols	sugar alcohols	1	GCMS		C4H10O4	UNXHWFMMPAWVPI-QWWZWVQMSA-N	C([C@H]([C@@H](CO)O)O)O	169019	85:123.0 86:39.0 87:235.0 88:92.0 89:794.0 91:41.0 92:65.0 93:48.0 94:22.0 97:38.0 101:1040.0 102:87.0 103:5119.0 104:409.0 105:302.0 106:38.0 112:26.0 113:47.0 114:17.0 115:225.0 116:875.0 117:3651.0 118:353.0 119:290.0 129:736.0 131:620.0 132:62.0 133:1389.0 134:137.0 135:41.0 143:141.0 145:31.0 147:6122.0 148:886.0 149:553.0 151:42.0 165:22.0 175:40.0 189:971.0 190:191.0 191:521.0 192:94.0 193…	2964	3312	1559	3636	1715	1985	2358	2825	2348	1724	1775	3057	6122	2014	3418	3718	3409	4109	1384	1343	2627	2678	1050	1866	2223	1980	1643	2245	1000	2013	315	1774	1923
172	292	497572	threonic acid	Organic oxygen compounds	Organooxygen compounds	Carbohydrates and carbohydrate conjugates	Sugar acids and derivatives	butyrates	1	GCMS		C4H8O5	JPIJQSOTBSSVTP-STHAYSLISA-N	C([C@@H]([C@H](C(=O)O)O)O)O	5460407	86:78.0 87:500.0 88:136.0 89:1131.0 90:139.0 91:82.0 95:22.0 98:80.0 99:146.0 101:890.0 102:4177.0 103:5003.0 104:619.0 105:374.0 111:46.0 112:15.0 113:201.0 115:359.0 116:115.0 117:5872.0 118:496.0 119:430.0 121:39.0 128:64.0 129:1372.0 130:3055.0 131:1659.0 132:232.0 133:2893.0 134:460.0 135:237.0 136:30.0 141:29.0 143:619.0 144:80.0 145:104.0 147:16627.0 148:2848.0 149:2024.0 152:34.0 157:244.…	5877	9592	2002	3433	957	9688	8042	167	539	474	19818	245	689	2340	1497	996	943	2130	1126	1071	1235	967	678	537	1348	1599	1263	994	1918	421	293	229	468
8.30_118.05	118.05	8.305	Threonine	Organic acids and derivatives	Carboxylic acids and derivatives	Amino acids, peptides, and analogues	Amino acids and derivatives	amino acids	1	HILIC ESI-	[M-H]-	C4H9NO3	AYFVYJQAPQTCCC-GBXIJSLDSA-N	C[C@H]([C@@H](C(=O)O)N)O	6288	67.4388:1890 72.00774:2887 74.02345:3778 117.92717:11172 118.02817:2413	8650572	12137530	4507481	3871252	132000	14331578	1955846	12760620	21522648	439022	7405711	10768227	10127949	4693896	8424867	4752160	108264	4009333	9563055	9327270	2281012	898462	11254873	18089380	17031206	14511058	4513304	7137324	15764407	20869472	2455396	17440476	19912416
2.69_241.08	241.083	2.692	Thymidine	Nucleosides, nucleotides, and analogues	Pyrimidine nucleosides	Pyrimidine 2'-deoxyribonucleosides	Pyrimidine 2'-deoxyribonucleosides	nucleoside metabolite	1	HILIC ESI-	[M-H]-	C10H14N2O5	IQFYYKKMVGJFEH-XLPZGREQSA-N	CC1=CN(C(=O)NC1=O)[C@H]2C[C@@H]([C@H](O2)CO)O	5789	63.69169:2086 71.97363:2282 73.55721:1976 90.5761:2186 125.03448:9326 151.05051:25644 163.34866:1989 178.75606:2413 197.11821:4886 202.59767:3069 241.08282:144442 241.10733:7682	1364748	9871506	261113	2419464	51144	4262220	553575	201088	190581	26654	6759575	4739186	1670992	1126037	451170	80772	6571	2171	1916306	645808	408523	131049	5449675	996693	2242826	1281765	1260096	39230	794699	358092	96504	1419165	220719
43180	158	460662	trans-4-hydroxyproline	Organic acids and derivatives	Carboxylic acids and derivatives	Amino acids, peptides, and analogues	Amino acids and derivatives	imino acids	1	GCMS		C5H9NO3	PMMYEEVYMWASQN-DMTCNVIQSA-N	C1[C@H](CN[C@@H]1C(=O)O)O	5810	86:496.0 88:18.0 90:38.0 91:40.0 100:34.0 101:5.0 106:27.0 107:16.0 108:57.0 110:12.0 111:3.0 116:445.0 118:584.0 120:50.0 124:71.0 128:2.0 130:368.0 133:14.0 134:244.0 135:1.0 136:2.0 137:3.0 142:291.0 143:10.0 148:375.0 150:25.0 153:1.0 158:3885.0 159:532.0 160:154.0 170:138.0 171:41.0 180:2.0 181:4.0 183:3.0 184:35.0 185:30.0 186:36.0 195:2.0 199:2.0 212:1.0 213:2.0 225:8.0 237:2.0 239:1.0 241…	1017	396	267	562	2421	391	1004	1149	2012	435	179	505	314	239	485	3474	3174	9649	1326	1247	334	2662	255	1336	2228	1018	484	2098	849	2029	121	2315	4307
111823	191	948197	trehalose	Organic oxygen compounds	Organooxygen compounds	Carbohydrates and carbohydrate conjugates	Glycosyl compounds	sugars	1	GCMS		C12H22O11	HDTRYLNUVZCQOY-LIZSDCNHSA-N	C([C@@H]1[C@H]([C@@H]([C@H]([C@H](O1)O[C@@H]2[C@@H]([C@H]([C@@H]([C@H](O2)CO)O)O)O)O)O)O)O	7427	85:94.0 98:34.0 99:34.0 103:3530.0 104:205.0 109:159.0 111:125.0 113:165.0 116:172.0 117:768.0 118:42.0 119:60.0 120:25.0 129:2648.0 130:212.0 131:480.0 132:80.0 133:615.0 135:78.0 139:73.0 140:35.0 147:3851.0 148:529.0 149:300.0 150:65.0 151:32.0 154:24.0 155:298.0 157:181.0 169:1745.0 170:122.0 171:166.0 173:76.0 174:14.0 177:56.0 181:35.0 189:344.0 190:84.0 191:3330.0 192:394.0 193:183.0 199:3…	4407	2541	9736	6659	6784	17088	7879	2848	1873	8622	5999	2435	7107	8591	2537	5627	4716	8334	4300	3880	4146	3536	1977	4613	2991	1550	11667	3375	2114	2038	127996	1572	4532
5.55_76.08	76.0757	5.555	Trimethylamine N-oxide	Organic nitrogen compounds	Organonitrogen compounds	Aminoxides	Trialkyl amine oxides	methylamines	1	HILIC ESI+	[M+H]+	C3H9NO	UYPYRKYUKCHHIB-UHFFFAOYSA-N	C[N+](C)(C)[O-]	1145	58.06538:399230 59.0732:389991 62.24551:1735 76.07571:162696	1692918	nd	2557266	2626129	9959	128620	4988	3927	4120	20880	2454135	nd	nd	1117314	19549734	nd	2477	nd	nd	nd	21567	nd	2926476	22755	nd	nd	5125	nd	nd	2653	20854845	2559	13316
6.87_203.08	203.082	6.866	Tryptophan	Organoheterocyclic compounds	Indoles and derivatives	Indolyl carboxylic acids and derivatives	Indolyl carboxylic acids and derivatives	amino acids, aromatic	1	HILIC ESI-	[M-H]-	C11H12N2O2	QIVBCDIJIAJPQS-VIFPVBQESA-N	C1=CC=C2C(=C1)C(=CN2)C[C@@H](C(=O)O)N	6305	53.31495:2319 55.36452:1857 67.19991:1932 72.00761:23894 74.02328:35064 75.53336:1960 83.28859:1911 99.34169:2144 116.04926:98197 116.05865:3364 142.06514:25665 159.09184:32399 165.83516:7712 166.83249:23939 186.05412:3332 202.80127:9914 203.0818:113029	1145109	1896142	607627	587016	3990	3534372	133966	1091061	2425181	24915	805032	1274144	730397	789768	1232379	946659	568804	1006694	1196914	1495146	1583979	1318563	1753989	63794	2161532	2318881	572432	135786	358056	1988007	307007	2043431	2263495
7.72_182.08	182.081	7.719	Tyrosine	Organic acids and derivatives	Carboxylic acids and derivatives	Amino acids, peptides, and analogues	Amino acids and derivatives	amino acids, aromatic	1	HILIC ESI+	[M+H]+	C9H11NO3	OUYCCCASQSFEME-QMMMGPOBSA-N	C1=CC(=CC=C1C[C@@H](C(=O)O)N)O	6057	87.04404:6477 91.05433:71436 95.04932:26034 103.05456:7123 104.63701:4882 110.05733:18773 118.065:5845 119.04917:329119 121.06448:17410 123.044:694132 136.07564:2109015 137.05943:8922 147.04391:371354 147.05722:11863 164.07028:70944 165.05455:1064938 182.07932:555031	2657492	6209347	3210640	1636765	511012	3880470	581259	3620404	5896351	162722	4712331	2876903	1836735	3183785	3389089	2759680	936649	2472767	3476792	5603621	874044	3782960	5807821	5857084	3328083	4138501	1947367	405277	783350	6320016	992825	3411548	5007100
7.44_345.14	345.144	7.438	Tyr-Tyr	Organic acids and derivatives	Carboxylic acids and derivatives	Amino acids, peptides, and analogues	Peptides	di-peptides	1	HILIC ESI+	[M+H]+	C18H20N2O5	JAQGKXUEKGKTKX-HOTGVXAUSA-N	C1=CC(=CC=C1C[C@@H](C(=O)N[C@@H](CC2=CC=C(C=C2)O)C(=O)[O-])[NH3+])O	6998943	57.0979:2514 72.08089:98469 72.08539:3503 79.69215:2044 86.0965:39557 91.05428:11446 107.0489:3719 119.04927:23800 121.06513:3604 129.10228:15676 130.09413:2015 132.10197:3612 136.07574:622625 141.05475:4175 143.11812:10142 148.37029:2300 157.09767:10587 162.05544:3386 164.03465:2202 165.05499:12201 171.11263:4134 175.10812:10008 182.08086:40124 186.1235:8236 189.12282:18752 198.90823:9109 208.06…	58636	128803	93201	109790	69694	6177	42438	8701	nd	4629	12913	64358	11084	91769	18626	2539	6190	16951	6776	19651	23244	9037	155982	16521	46613	32269	9278	29278	213477	47050	82475	3541	nd
21705	217	585473	UDP-glucuronic acid	Nucleosides, nucleotides, and analogues	Pyrimidine nucleotides	Pyrimidine nucleotide sugars	Pyrimidine nucleotide sugars	phenolic natural products	1	GCMS		C15H22N2O18P2	HDYANYHVCAPMJV-LXQIFKJMSA-N	C1=CN(C(=O)NC1=O)[C@H]2[C@@H]([C@@H]([C@H](O2)COP(=O)(O)OP(=O)(O)O[C@@H]3[C@@H]([C@H]([C@@H]([C@H](O3)C(=O)O)O)O)O)O)O	17473	85:836.0 86:140.0 89:1123.0 90:104.0 91:79.0 93:59.0 95:150.0 97:257.0 98:49.0 99:769.0 100:56.0 101:10488.0 102:871.0 103:3819.0 104:238.0 105:458.0 107:72.0 108:6.0 109:366.0 111:1096.0 112:28.0 113:631.0 114:58.0 115:828.0 116:9417.0 117:6717.0 118:797.0 119:682.0 120:43.0 121:42.0 122:1.0 123:812.0 124:139.0 125:97.0 126:23.0 127:433.0 129:8544.0 130:854.0 131:1568.0 132:223.0 133:3913.0 134:…	23061	12525	57725	73317	6198	22877	2250	3562	8788	1193	2916	9028	11779	42596	31872	2248	3006	4235	3922	1405	3878	1125	5544	13467	1808	9852	8322	4131	8411	3407	1861	667	1838
3256	189	326574	urea	Organic acids and derivatives	Organic carbonic acids and derivatives	Ureas	Ureas	organic chemicals	1	GCMS		CH4N2O	XSQUKJJJFZCRTK-UHFFFAOYSA-N	C(=O)(N)N	1176	85:859.0 86:1343.0 87:2349.0 88:432.0 90:43.0 91:99.0 92:36.0 98:133.0 99:5452.0 100:6216.0 101:1289.0 102:803.0 103:149.0 107:195.0 110:309.0 111:554.0 113:326.0 114:765.0 115:629.0 116:182.0 117:375.0 118:388.0 126:44.0 127:542.0 129:155.0 130:2178.0 131:1631.0 132:1249.0 133:328.0 134:319.0 136:55.0 137:40.0 138:7.0 139:106.0 140:86.0 141:220.0 143:208.0 144:172.0 146:1945.0 147:24448.0 148:42…	79384	11755	276877	1199485	30346	99182	28842	11413	8734	47293	416463	12289	35084	599231	329981	44001	8916	23858	20152	19189	17536	327	10949	23714	20822	11893	81948	15590	14475	12493	66677	3078	5314
4.95_243.06	243.062	4.954	Uridine	Nucleosides, nucleotides, and analogues	Pyrimidine nucleosides		Pyrimidine nucleosides	nucleoside metabolite	1	HILIC ESI-	[M-H]-	C9H12N2O6	DRTQHJPVMGBUCF-XVFCMESISA-N	C1=CN(C(=O)NC1=O)[C@H]2[C@@H]([C@@H]([C@H](O2)CO)O)O	6029	50.03938:4383 56.28233:3283 59.01244:7145 66.02952:4068 66.03351:112680 68.01276:7350 68.23105:3646 71.01236:5539 78.16739:3245 82.02847:193711 83.01279:4376 84.0442:16043 94.02834:7910 96.04411:14794 108.04407:31764 110.02346:1411916 111.00991:6408 111.0187:104445 117.01807:20883 120.04452:5742 122.02356:83006 124.03972:30633 125.33758:3204 126.05515:6270 132.02933:5560 138.01863:8182 138.05475:…	1617282	22399818	306151	935507	203581	1383225	3083221	228185	196961	175419	2536852	8405020	5159096	459294	560689	215383	44824	17860	3706811	835828	258056	223544	10886298	4710160	4693570	8776430	4494518	907373	5069551	1435577	2290195	10468610	1430259
UDCA			Ursodeoxycholic acid	Lipids and lipid-like molecules	Steroids and steroid derivatives	Bile acids, alcohols and derivatives	Hydroxy bile acids, alcohols and derivatives	unconjugated bile acids	1	LC-MS/MS_BA		C24H40O4	RUDATBOHQWOJDD-UZVSRGJWSA-N	C[C@H](CCC(=O)O)[C@H]1CC[C@@H]2[C@@]1(CC[C@H]3[C@H]2[C@H](C[C@H]4[C@@]3(CC[C@H](C4)O)C)O)C	31401	391.3 / 391.3	7456	4796	150	211	304	1489	868	5418	5090	12075	1882	1710	6852	151	444	1215	8317	3628	737	7622	11906	5734	9614	1233	8275	3346	5960	15579	26169	16793	719	1321	1701
VA			Valeric Acid	Lipids and lipid-like molecules	Fatty Acyls	Fatty acids and conjugates	Straight chain fatty acids	SCFAs	1	SCFA_GC		C5H10O2	NQPDZGIKBAWPEJ-UHFFFAOYSA-N	CCCCC(=O)O	7991		24	37	22	13	120	24	26	40	47	145	37	67	263	16	9	12	42	17	43	105	65	69	24	102	67	33	142	50	25	53	11	12	27
5.48_431.10	431.098	5.482	Vitexin	Phenylpropanoids and polyketides	Flavonoids	Flavonoid glycosides	Flavonoid C-glycosides	phenolic natural products	1	HILIC ESI-	[M-H]-	C21H20O10	SGEWCQFRYRRZDC-VPRICQMDSA-N	C1=CC(=CC=C1C2=CC(=O)C3=C(O2)C(=C(C=C3O)O)[C@H]4[C@@H]([C@H]([C@@H]([C@H](O4)CO)O)O)O)O	5280441	92.79782:2298 111.96681:2557 153.23679:2490 212.11349:2549 216.16386:3048 269.0455:25113 271.44971:2228 277.26788:3119 281.04523:15110 282.05374:14891 283.0611:106884 295.06137:3463 311.05618:534843 320.20715:2493 323.05661:32923 325.07391:4460 341.06668:216374 353.06668:12093 355.08038:2678 413.08646:9464 431.09769:165344	nd	nd	nd	nd	nd	nd	nd	nd	nd	nd	nd	nd	nd	nd	nd	nd	nd	nd	3938	2263	nd	6148	nd	nd	nd	4015	1616	nd	nd	nd	nd	8727	8754
1669	353	701688	xanthine	Organoheterocyclic compounds	Imidazopyrimidines	Purines and purine derivatives	Xanthines	nucleoside metabolite	1	GCMS		C5H4N4O2	LRFVTYWOQMYALW-UHFFFAOYSA-N	C1=NC2=C(N1)C(=O)NC(=O)N2	1188	85:2517.0 86:3710.0 87:2079.0 88:382.0 89:398.0 90:80.0 91:121.0 92:294.0 93:389.0 94:217.0 95:887.0 96:502.0 97:447.0 98:2556.0 99:3280.0 100:20394.0 101:2912.0 102:1806.0 103:2337.0 104:350.0 105:1446.0 106:113.0 107:15.0 108:151.0 109:225.0 110:796.0 111:2460.0 112:928.0 113:1375.0 114:1007.0 115:2460.0 116:1524.0 117:4430.0 118:716.0 119:955.0 120:203.0 121:149.0 122:214.0 123:385.0 124:753.0…	3485	10513	423	408	479	1285	478	142	199	681	776	534	1202	1628	202	23253	356	408	23696	31898	574	484	5658	2742	7655	4440	6823	1752	2467	12128	145	12251	34376
17400	189	590775	xylonic acid isomer	Organic oxygen compounds	Organooxygen compounds	Carbohydrates and carbohydrate conjugates	Sugar acids and derivatives	sugars	1	GCMS		C5H10O6	QXKAIJAYHKCRRA-UHFFFAOYSA-N	C(C(C(C(C(=O)O)O)O)O)O	10264	87:564.0 88:73.0 89:616.0 90:65.0 95:13.0 96:2.0 97:6.0 101:667.0 102:1905.0 103:13800.0 104:1125.0 105:419.0 106:2.0 107:48.0 108:15.0 109:19.0 111:17.0 115:299.0 116:152.0 117:3134.0 118:129.0 119:150.0 124:13.0 126:7.0 129:1533.0 130:1170.0 131:2059.0 132:266.0 133:2726.0 134:507.0 139:7.0 141:287.0 142:32.0 143:1791.0 144:294.0 145:198.0 147:14316.0 148:1620.0 149:1099.0 150:198.0 151:73.0 15…	5243	869	4402	4640	2537	12552	2533	1350	1253	1088	150	2844	4464	4021	2585	1869	725	4164	1223	3122	2287	1848	999	2264	2447	1843	3454	1260	1562	2028	118	1072	1777
1808	217	535176	xylonolactone	Organoheterocyclic compounds	Lactones	Delta valerolactones	Delta valerolactones	sugars	1	GCMS		C5H8O5	XXBSUZSONOQQGK-FLRLBIABSA-N	C1[C@H]([C@@H]([C@H](C(=O)O1)O)O)O	439692	86:6.0 88:17.0 89:5.0 101:53.0 103:590.0 104:3.0 107:94.0 109:11.0 115:14.0 117:33.0 119:41.0 129:448.0 131:202.0 132:16.0 133:173.0 134:3.0 135:35.0 141:31.0 142:3.0 143:208.0 144:4.0 145:90.0 147:1035.0 148:163.0 149:112.0 159:13.0 169:60.0 177:13.0 183:7.0 184:36.0 185:1.0 189:245.0 190:54.0 191:253.0 194:11.0 199:18.0 207:671.0 208:114.0 209:52.0 215:200.0 217:4500.0 218:698.0 219:375.0 220:2…	55507	8197	1981	13105	2370	208216	6230	2959	2133	922	854	8129	6566	17338	2365	4200	2606	9668	4692	3691	3033	2577	503	7408	9143	4085	1254	7412	5917	1216	758	4305	5491
383564	307	546308	xylose	Organic oxygen compounds	Organooxygen compounds	Carbohydrates and carbohydrate conjugates	Monosaccharides	sugars	1	GCMS		C5H10O5	SRBFZHDQGSBBOR-IOVATXLUSA-N	C1[C@H]([C@@H]([C@H](C(O1)O)O)O)O	135191	85:57.0 86:2871.0 87:1694.0 88:1594.0 89:21844.0 90:569.0 91:328.0 94:659.0 95:212.0 100:6987.0 101:8647.0 102:3720.0 103:137570.0 104:13575.0 105:9237.0 106:427.0 107:191.0 112:565.0 113:2749.0 114:4063.0 116:1032.0 117:15167.0 118:1854.0 119:1650.0 120:385.0 121:165.0 124:272.0 126:692.0 127:568.0 128:580.0 129:17624.0 131:3464.0 133:16190.0 134:2291.0 135:2185.0 136:162.0 139:46.0 142:1407.0 1…	48700	86638	2604	5214	1584	24694	3095	543	759	982	3439	8554	3021	1416	4654	416	646	1002	2488	2293	1482	2071	83441	7768	9636	49297	1751	80031	2880	600	1967	4619	2224
31632	173	553450	xylulose	Organic oxygen compounds	Organooxygen compounds	Carbohydrates and carbohydrate conjugates	Monosaccharides	sugars	1	GCMS		C5H10O5	LQXVFWRQNMEDEE-PYHARJCCSA-N	C1[C@@H]([C@H](C(O1)(CO)O)O)O	439205	85:1861.0 86:702.0 87:1148.0 88:324.0 89:10095.0 90:1041.0 91:452.0 94:60.0 95:96.0 96:155.0 97:114.0 98:195.0 99:528.0 100:1225.0 101:2618.0 102:774.0 103:9082.0 104:930.0 106:381.0 108:16.0 109:127.0 110:14.0 111:327.0 112:10.0 113:567.0 114:3170.0 115:1092.0 116:1102.0 117:15978.0 118:1867.0 119:1700.0 120:3.0 125:55.0 126:826.0 128:264.0 129:1798.0 130:91.0 131:1527.0 132:491.0 133:5046.0 134…	7876	23493	2897	12380	3257	5271	4800	3684	3424	743	5431	9153	1345	6097	4039	2732	1705	2922	6545	5491	3258	3388	7647	3296	8317	9765	1617	8175	2126	1963	423	5427	7407
5.49_174.15	174.149	5.489	(+)-Muscarine cation	Organic oxygen compounds	Organooxygen compounds	Carbohydrates and carbohydrate conjugates	Monosaccharides	trimethyl ammonium compounds	3	HILIC ESI+	[Cat]+	C9H20NO2	UQOFGTXDASPNLL-XHNCKOQMSA-N	C[C@H]1[C@@H](C[C@H](O1)C[N+](C)(C)C)O	9308	51.4778:1767 56.33446:2276 57.03361:2229 57.44864:2123 58.06536:38597 59.04924:3249 59.07321:29139 60.08098:203593 60.67435:2001 69.06996:24357 73.06464:10972 75.28008:1969 78.80214:2447 96.05212:3268 97.06443:4012 104.15562:2213 114.39498:2132 115.07462:3742 174.14874:1038255	9160	414660	6659	7021	190386	433506	336662	31853	15692	121139	12125	167277	319028	12137	9224	152802	62135	33198	180307	695942	911438	685919	106755	169563	805553	177137	1284958	41278	118004	189130	51353	61186	105619
6.59_162.05	162.055	6.588	1,5-Isoquinolinediol	Organoheterocyclic compounds	Isoquinolines and derivatives		Isoquinolines and derivatives	indoles	3	HILIC ESI+	[M+H]+	C9H7NO2	LFUJIPVWTMGYDG-UHFFFAOYSA-N	C1=CC2=C(C=CNC2=O)C(=C1)O	1340	79.21841:2020 80.35001:1958 91.05386:2632 97.97977:2100 103.06371:2545 106.06509:7341 116.04959:24163 134.06013:76464 144.04459:37829 162.0549:965421 162.13757:4434	nd	nd	nd	nd	nd	nd	nd	nd	nd	nd	nd	nd	nd	nd	nd	nd	nd	nd	3696	257593	1209672	108568	38241	nd	66420	nd	1106046	nd	32259	23585	nd	nd	nd
1.15_297.24	297.242	1.151	12(13)-Epoxy-9Z-octadecenoic acid	Lipids and lipid-like molecules	Fatty Acyls	Fatty acids and conjugates	Long-chain fatty acids	unsaturated fatty acids	3	HILIC ESI+	[M+H]+	C18H32O3	CCPPLLJZDQAOHD-FLIBITNWSA-N	CCCCCC1C(O1)C/C=C\CCCCCCCC(=O)O	5356421	55.01822:3312 55.05452:20532 57.0338:4527 57.07014:23408 67.05436:94203 69.06995:49961 71.04929:5495 71.08563:118703 71.8183:2451 73.45726:2190 79.05425:25150 81.06993:133474 83.04906:5078 83.08549:48543 85.06489:18987 85.10116:12977 91.05428:15864 93.06994:36173 95.08557:146298 97.06493:14649 97.10114:47223 99.08049:142642 105.07011:17491 107.08571:45086 109.06543:2405 109.10111:99454 111.08037:…	121323	19681	28798	26479	60453	41097	47728	79246	69290	115458	194570	21181	66529	19326	62771	27307	64299	63270	36144	328609	204363	118139	143709	85981	152047	29815	378621	934686	407790	272934	30099	5636	38212
1.03_295.23	295.227	1.032	13-Keto-9Z,11E-octadecadienoic acid	Lipids and lipid-like molecules	Fatty Acyls	Lineolic acids and derivatives	Lineolic acids and derivatives	unsaturated_FA	3	HILIC ESI+	[M+H]+	C18H30O3	JHXAZBBVQSRKJR-BSZOFBHHSA-N	CCCCCC(=O)/C=C/C=C\CCCCCCCC(=O)O	6446027	55.05451:54048 57.03372:14758 57.07007:24318 60.94213:5806 66.55975:6371 67.05435:147502 69.07:83826 71.04899:11913 71.08558:313649 79.0543:157717 81.03337:42078 81.065:10307 81.06998:258868 83.04908:49413 83.08543:69306 85.06444:12281 86.24775:6445 91.05426:66073 93.06995:283488 95.049:47902 95.07912:8664 95.08553:190444 97.06484:39439 97.10109:41988 99.07322:11601 99.08049:326301 105.07005:7225…	65079	31257	15529	16200	26930	48164	25302	9747	21912	21629	533562	24954	55188	19248	24733	52113	26103	13013	28168	96192	51645	43678	126673	370897	41106	65219	71354	108538	64743	77049	17385	16571	26084
1.43_301.22	301.216	1.434	17(18)-Epoxy-5Z,8Z,11Z,14Z-eicosatetraenoic acid	Lipids and lipid-like molecules	Fatty Acyls	Fatty acids and conjugates	Long-chain fatty acids	unsaturated fatty acids	3	HILIC ESI+	[M+H-H2O]+	C20H30O3	GPQVVJQEBXAKBJ-YQLHGUCYSA-N	CC[C@@H]1[C@@H](O1)C/C=C\C/C=C\C/C=C\C/C=C\CCCC(=O)O	27076755	54.4607:3348 54.67555:2945 55.05444:61982 57.03361:7836 57.07005:19245 67.05429:74137 69.03355:18622 69.06993:61503 71.04913:56642 77.95168:2987 79.05418:62689 81.06989:358242 83.08549:79636 85.06485:33003 91.05411:62148 91.05949:4147 93.06991:384948 95.04941:3885 95.08552:621414 97.06489:24495 97.10107:51888 99.04408:273658 99.05041:4757 99.08027:21382 101.05946:6631 105.06989:340963 107.08549:3…	103358	128123	30269	nd	34068	63438	244883	186860	232888	1398890	7764	1225443	871585	10768	120851	86528	111056	47237	160227	133180	86884	70366	96273	10333	146923	204453	141166	60885	55133	84756	nd	59531	60671
1.36_167.04	167.037	1.358	3-Hydroxy-4-methoxybenzoic acid	Benzenoids	Benzene and substituted derivatives	Benzoic acids and derivatives	Methoxybenzoic acids and derivatives	phenolic natural products	3	HILIC ESI-	[M-H]-	C8H8O4	LBKFGYZQBSGRHY-UHFFFAOYSA-N	COC1=C(C=C(C=C1)C(=O)O)O	12575	54.88804:2267 58.54857:2159 58.71815:1911 78.82143:1857 97.95065:1942 99.04391:2405 108.02042:17658 111.00747:9217 123.04395:20910 123.08053:28470 124.01577:8490 126.74277:2238 132.14362:2037 132.8669:60204 152.01071:75036 167.03433:403739 167.06999:9893	612194	725555	356965	450261	198913	485758	66092	132370	72257	69181	72905	1832996	293955	410471	233433	130171	81987	66122	271030	261370	475435	542909	48439	66652	300081	109559	1950246	116150	92990	167560	55357	86633	107252
1.32_110.06	110.06	1.323	4-Aminophenol	Benzenoids	Benzene and substituted derivatives	Aniline and substituted anilines	Aniline and substituted anilines	phenolic natural products	3	HILIC ESI+	[M+H]+	C6H7NO	PLIKAWJENQZMHA-UHFFFAOYSA-N	C1=CC(=CC=C1N)O	13283155	62.23771:1963 65.03874:10312 67.04166:4228 67.16332:2004 68.00357:1921 72.27215:1984 77.35535:1804 80.15398:1865 82.06513:4435 92.04948:3630 93.03378:3090 110.06017:212443	216184	35819	108517	244174	22800	247455	22054	32798	22255	34706	313438	50014	114275	208602	77821	43682	18864	20069	37665	58790	33059	52678	52201	68604	99964	89519	65182	90198	31108	31516	61981	42892	58483
3.67_173.04	173.045	3.666	4-Ketopimelic acid	Organic acids and derivatives	Keto acids and derivatives	Medium-chain keto acids and derivatives	Medium-chain keto acids and derivatives	dicarboxylic acids	3	HILIC ESI-	[M-H]-	C7H10O5	UDDSEESQRGPVIL-UHFFFAOYSA-N	C(CC(=O)O)C(=O)CCC(=O)O	95084	51.66121:1712 57.03329:9336 59.01263:14445 60.03656:1904 67.09695:1869 71.01257:2681 80.74571:1846 83.04899:7549 84.79584:1894 85.05891:3830 85.06461:103802 85.96382:1826 93.03336:4301 99.9248:3319 111.04391:120296 111.08025:8231 129.05461:154019 136.86166:2237 137.02324:40318 155.03403:51397 173.04491:120181 173.05945:8234 173.08084:10219	63705	205585	47176	30501	284564	221572	119860	102741	124611	108845	79051	264628	148253	86445	181406	170208	104225	95429	158735	514873	528922	273174	105794	103664	278115	205003	846690	258391	204682	206731	84532	137593	95585
1.35_181.01	181.013	1.346	5-Hydroxyisophthalic acid	Benzenoids	Benzene and substituted derivatives	Benzoic acids and derivatives	Phthalic acid and derivatives	phenolic natural products	3	HILIC ESI-	[M-H]-	C8H6O5	QNVNLUSHGRBCLO-UHFFFAOYSA-N	C1=C(C=C(C=C1C(=O)O)O)C(=O)O	69257	57.63997:1897 66.22688:1867 93.0333:86587 93.6357:1959 112.98473:2311 137.02324:114639 145.62547:1978 181.01323:31814	50794	169591	10788	17327	44646	294255	59034	47093	38801	66714	16610	205440	105179	41644	49474	44016	40761	26656	101665	521721	664081	326986	62345	45921	297316	170886	1588753	19349	49035	115265	15191	77995	46427
1.01_297.24	297.242	1.015	9(10)-Epoxy-12Z-octadecenoic acid	Lipids and lipid-like molecules	Fatty Acyls	Fatty acids and conjugates	Medium-chain fatty acids	unsaturated fatty acids	3	HILIC ESI+	[M+H]+	C18H32O3	FBUKMFOXMZRGRB-XKJZPFPASA-N	CCCCC/C=C\C[C@@H]1[C@@H](O1)CCCCCCCC(=O)O	12097313	55.01806:33660 55.05453:42963 56.81625:2948 57.03367:19803 57.07022:29022 58.54295:2344 62.08546:3427 63.23521:3186 67.05434:166570 69.03336:11944 69.06999:104245 71.04906:22058 71.08557:38351 79.05427:40060 81.0699:283507 83.04899:20331 83.08554:67693 85.06461:17708 85.10112:6780 90.02257:2782 91.05395:13813 93.06984:59283 95.08553:327315 97.06492:33305 97.10131:55551 99.08057:46701 105.06963:15…	19912	10239	17168	16575	55173	66787	27102	14521	26551	17332	32060	12820	25166	76440	26172	38002	15529	5593	18694	12868	48970	54286	53608	351068	24913	8404	61644	36139	102388	39740	91105	9626	19229
1.45_295.23	295.227	1.45	9-Oxo-10E,12Z-octadecadienoic acid	Lipids and lipid-like molecules	Fatty Acyls	Lineolic acids and derivatives	Lineolic acids and derivatives	unsaturated_FA	3	HILIC ESI+	[M+H]+	C18H30O3	LUZSWWYKKLTDHU-ZJHFMPGASA-N	CCCCC/C=C\C=C\C(=O)CCCCCCCC(=O)O	9839084	55.01812:19478 55.05454:42141 55.4812:2287 57.03347:4264 57.06998:14555 67.05435:99934 69.03345:8562 69.07002:51293 70.41101:2778 70.42006:2246 71.049:5068 71.08112:3715 71.08556:102067 73.40678:2391 79.05425:42396 81.03328:11904 81.06992:112764 83.04918:18952 83.08553:67536 85.06448:15931 85.10094:15283 91.05418:28907 93.06996:84276 95.04919:26347 95.07928:3577 95.08553:87373 97.06485:31875 97.1…	166070	277807	22155	40620	67252	238812	120496	274299	159130	213934	137934	225656	206684	58498	39953	74157	158893	151426	261740	1119327	1253450	840922	669428	448415	1005027	261713	3049511	567654	649227	703121	41458	128601	123392
8.93_359.24	359.24	8.925	Ala-Ile-Arg	Organic acids and derivatives	Carboxylic acids and derivatives	Amino acids, peptides, and analogues	Peptides	tri-peptides	3	HILIC ESI+	[M+H]+	C15H30N6O4	NYDBKUNVSALYPX-UHFFFAOYSA-N	CCC(C)C(C(=O)NC(CCCN=C(N)N)C(=O)O)NC(=O)C(C)N	18218409	60.05585:52554 70.06527:67068 72.0807:13068 73.69982:2432 81.39658:2360 84.08055:12910 86.09646:224431 112.08706:34244 113.07063:10681 114.06562:2624 114.10264:11879 115.08671:31764 115.53776:2619 116.0621:4033 116.07068:79672 129.10178:13656 130.08617:12616 130.09726:19507 132.5995:2590 133.09705:19725 147.11301:26830 156.11295:34528 157.10832:11540 157.13348:333753 158.09238:102925 175.11891:46…	nd	nd	nd	3605	nd	nd	nd	nd	nd	nd	nd	3901	nd	85848	nd	3348	18243	5870	9903	nd	nd	41546	121227	62601	nd	6446	nd	nd	6639	5684	3249838	38894	2867
9.42_343.21	343.209	9.422	Ala-Pro-Arg	Organic acids and derivatives	Carboxylic acids and derivatives	Amino acids, peptides, and analogues	Peptides	tri-peptides	3	HILIC ESI+	[M+H]+	C14H26N6O4	MAZZQZWCCYJQGZ-UHFFFAOYSA-N	CC(C(=O)N1CCCC1C(=O)NC(CCCN=C(N)N)C(=O)O)N	18218492	54.81264:2277 56.459:2045 60.05589:38634 70.06524:129973 72.0807:18107 80.91225:2165 84.08056:11381 85.02792:2885 86.0963:5463 91.03914:2233 110.07104:2691 112.08704:17565 113.07069:2371 114.0664:2462 114.10258:24789 115.08611:17345 116.07078:34056 124.53477:2656 129.10217:9775 130.0972:8956 140.08197:17396 141.10223:47615 147.11272:4143 157.10847:5467 158.09229:29486 163.0598:2411 166.09703:5451…	949628	59701	25450	8971	nd	5205	nd	5571	9299	nd	426277	73754	4061	63038	51259	nd	nd	nd	26057	52351	21288	12974	90243	3259	nd	37505	13245	134213	139996	41153	159320	1998	nd
5.03_480.33	480.331	5.033	Ala-TriHydroxylated BA	Lipids and lipid-like molecules	Steroids and steroid derivatives	Bile acids, alcohols and derivatives	Glycinated bile acids and derivatives	conjugated bile acids	3	HILIC ESI+	[M+H]+	null	null	null		72.0444:4150 85.06457:3088 88.07574:10433 90.05501:84037 90.06114:3744 107.08523:4997 114.06653:3539 128.07053:6170 131.08508:2810 135.11694:2761 147.11682:3318 154.08667:3593 159.11693:5172 172.09659:24218 185.13277:3507 199.14877:14163 201.16322:3367 201.89307:3901 209.13179:18988 211.149:3865 213.16426:19540 223.14795:3383 225.16467:3689 227.14284:17258 227.18053:11698 229.15996:3407 237.00554…	217941	185860	35112	nd	nd	55236	nd	232534	626976	nd	54467	72949	14501	11660	58705	54134	89979	199890	142486	246847	126109	171415	177678	56974	169856	102120	5154	246398	164754	511000	nd	128017	261147
9.30_317.22	317.218	9.298	Ala-Val-Lys	Organic acids and derivatives	Carboxylic acids and derivatives	Amino acids, peptides, and analogues	Peptides	tri-peptides	3	HILIC ESI+	[M+H]+	C14H28N4O4	XCIGOVDXZULBBV-UHFFFAOYSA-N	CC(C)C(C(=O)NC(CCCCN)C(=O)O)NC(=O)C(C)N	18218587	50.7277:2229 59.06048:10414 69.12229:2125 70.06519:2890 72.07655:5358 72.08085:109542 84.08088:80710 86.09635:4648 100.07584:8320 101.10709:2644 109.86739:2390 122.81573:2230 129.10213:87178 130.08615:128933 143.11784:190320 147.11269:210174 171.11282:40934 204.134:9334 238.06136:2299 246.18153:27995 282.18213:2824 299.20837:2699 317.21823:222083	7431	29795	12425	9770	nd	nd	nd	4388	nd	nd	nd	33999	nd	126454	8809	3683	12272	3541	13229	38910	18965	54350	213772	82212	4232	56953	7131	nd	7301	41978	872276	38214	9198
6.82_271.21	271.205	6.823	Androstadienone	Lipids and lipid-like molecules	Steroids and steroid derivatives	Androstane steroids	Androgens and derivatives	steroid and conjugates	3	HILIC ESI+	[M+H]+	C19H26O	HNDHDMOSWUAEAW-VMXHOPILSA-N	CC12CCC3C(C1CC=C2)CCC4=CC(=O)CCC34C	92979	54.59892:2053 67.05444:14486 69.06985:7801 73.06475:10601 73.09961:2079 73.44991:2219 75.31446:1974 79.05414:10404 81.03375:2840 81.06998:110242 83.08569:4464 86.83198:2022 91.05386:3273 93.06984:17485 95.08543:12836 97.10129:2642 105.0698:11225 107.08566:17404 109.02856:2360 109.10132:17435 111.11697:2232 117.06956:4007 119.08513:3373 121.10103:11378 123.08037:4257 123.501:2269 125.09735:2511 12…	2273	nd	4086	nd	nd	nd	nd	nd	nd	nd	nd	nd	nd	nd	nd	nd	nd	nd	nd	nd	nd	nd	nd	nd	nd	3120	nd	nd	nd	nd	2503	nd	nd
6.08_465.25	465.249	6.076	Androsterone glucuronide	Lipids and lipid-like molecules	Steroids and steroid derivatives	Steroidal glycosides	Steroid glucuronide conjugates	steroid and conjugates	3	HILIC ESI-	[M-H]-	C25H38O8	VFUIRAVTUVCQTF-SDHZCXLISA-N	C[C@]12CC[C@H](C[C@H]1CC[C@@H]3[C@@H]2CC[C@]4([C@H]3CCC4=O)C)O[C@H]5[C@@H]([C@H]([C@@H]([C@H](O5)C(=O)O)O)O)O	443078	57.03329:3941 59.01242:3385 71.01244:4039 75.00745:48342 85.02824:37405 95.0124:3495 113.02332:30665 116.9029:2670 129.82933:2727 234.88797:2311 271.19006:2657 458.38727:2275 465.24945:272696	56783	nd	91064	86663	nd	319381	nd	nd	nd	nd	58143	nd	nd	79449	48359	nd	nd	nd	nd	nd	nd	nd	10289	nd	nd	1200	nd	nd	nd	nd	8780	nd	nd
6.64_549.40	549.4	6.636	Arg-Dihydroxylated BA	Lipids and lipid-like molecules	Steroids and steroid derivatives	Bile acids, alcohols and derivatives	Glycinated bile acids and derivatives	conjugated bile acids	3	HILIC ESI+	[M+H]+	null	null	null		60.05569:6919 70.06514:40112 95.30608:3261 110.66812:3384 112.08696:26474 113.07063:5656 114.10268:6568 115.08677:33091 116.07048:25670 117.92842:3053 126.16437:3060 130.09712:4145 135.11688:4990 147.11662:3507 149.13231:4872 157.10817:12978 158.09224:111371 161.13147:5803 171.11699:3477 175.11887:160875 201.1635:3973 215.17958:5895 225.16385:4413 229.15924:7041 321.25681:23516 339.26788:30868 41…	2219935	31021	19222	nd	nd	601584	nd	76036	218284	nd	nd	nd	3751	nd	199233	18569	79989	36850	nd	41828	11711	29361	498827	4771	93614	360118	6522	50775	133139	242517	nd	63312	77504
8.68_288.20	288.203	8.684	Arg-Leu	Organic acids and derivatives	Carboxylic acids and derivatives	Amino acids, peptides, and analogues	Peptides	di-peptides	3	HILIC ESI+	[M+H]+	C12H25N5O3	WYBVBIHNJWOLCJ-DTWKUNHWSA-N	CC(C)C[C@@H](C(=O)O)NC(=O)[C@H](CCCNC(=N)N)N		51.27015:2377 52.74167:2540 60.05585:157748 61.20879:2143 64.56815:2049 68.18904:2379 70.06521:506649 71.04923:3369 71.93652:2381 86.09641:37691 88.07595:9860 88.09193:2575 97.07622:2659 98.05996:9973 112.0869:88674 114.10308:2755 115.08636:23740 116.07057:17595 129.3898:2644 130.09792:2958 132.10222:3950 138.02184:2991 140.08186:19905 141.11372:2900 143.03229:2798 152.35558:2211 152.70802:2663 1…	881867	371921	322087	2414514	33881	285068	101349	188544	442444	45398	189079	162504	143565	2813245	1038684	289496	385711	348305	360713	120974	97356	55580	4011578	672242	290041	2002417	78659	1711592	873525	544527	8527651	292938	121311
10.17_303.21	303.214	10.167	Arg-Lys	Organic acids and derivatives	Carboxylic acids and derivatives	Amino acids, peptides, and analogues	Peptides	di-peptides	3	HILIC ESI+	[M+H]+	C12H26N6O3	JQFZHHSQMKZLRU-IUCAKERBSA-N	C(CCN)C[C@@H](C(=O)O)NC(=O)[C@H](CCCN=C(N)N)N	6427006	55.28325:2474 60.04443:3600 60.05582:75365 69.04488:2930 70.06513:169082 72.0805:2582 84.08075:95563 88.07553:3057 97.27958:2324 99.05492:2796 100.07559:3191 101.10707:4765 110.07138:10651 112.08688:47050 114.52724:2795 115.08681:25264 116.07059:19180 129.10188:59983 130.086:28475 130.09682:9343 140.08183:33515 147.11252:41776 148.73196:2324 154.09741:4796 157.10834:44498 158.09204:39025 168.8246…	nd	nd	8442	5554	nd	nd	nd	nd	nd	nd	nd	nd	nd	119730	nd	nd	nd	nd	nd	nd	nd	nd	61934	3584	68896	37511	nd	nd	nd	2444	55475	nd	nd
8.67_322.19	322.187	8.673	Arg-Phe	Organic acids and derivatives	Carboxylic acids and derivatives	Amino acids, peptides, and analogues	Peptides	di-peptides	3	HILIC ESI+	[M+H]+	C15H23N5O3	PQBHGSGQZSOLIR-RYUDHWBXSA-N	C1=CC=C(C=C1)C[C@@H](C(=O)O)NC(=O)[C@H](CCCN=C(N)N)N	150964	60.05588:72250 70.0652:227912 80.91759:2360 88.0756:3771 97.07529:3553 98.0602:4774 101.54099:2069 112.08694:43561 115.08652:15396 116.07043:14729 120.08049:23260 130.09721:5043 140.08163:14684 157.10847:18839 158.09296:17946 160.09641:3258 166.08659:2914 175.11888:149412 190.09833:8031 199.71597:6945 199.73395:2699 202.41081:2453 242.12881:5585 245.12749:3055 246.11218:9499 259.15472:5307 262.15…	968802	330733	283845	1068033	20606	142489	42802	73418	231133	12856	159517	192994	103677	2008114	1057968	294925	150197	253390	171352	69473	74100	41228	2957990	529630	228720	1104555	34482	853986	450075	168463	1519950	334646	126394
7.14_565.40	565.395	7.138	Arg-TriHydroxylated BA	Lipids and lipid-like molecules	Steroids and steroid derivatives	Bile acids, alcohols and derivatives	Glycinated bile acids and derivatives	conjugated bile acids	3	HILIC ESI+	[M+H]+	null	null	null		50.27533:2782 52.26601:3082 55.25748:3171 60.05584:2951 62.23619:2676 70.06505:15062 111.27336:2888 112.08721:5261 115.08646:10559 116.07067:12249 156.56165:3228 158.0925:47150 175.11885:59368 209.13332:3875 213.16246:3942 227.14281:4120 301.46924:2738 319.24271:17730 337.25287:25054 494.33551:27234 529.37402:5444 547.38647:42227 565.39545:1056769	639424	176298	nd	nd	nd	153951	nd	nd	73326	nd	82567	nd	nd	nd	33643	45641	27384	77267	30171	107669	40088	nd	632236	4564	66738	193810	3907	68314	140152	323313	nd	51111	51664
6.06_507.34	507.342	6.062	Asn-Dihydroxylated BA	Lipids and lipid-like molecules	Steroids and steroid derivatives	Bile acids, alcohols and derivatives	Glycinated bile acids and derivatives	conjugated bile acids	3	HILIC ESI+	[M+H]+	null	null	null		50.33875:2466 57.84565:2640 76.03923:26585 81.06985:3360 85.06443:5979 95.08527:2967 109.10091:3135 112.03884:6463 112.07549:15852 114.05516:21697 114.0913:3764 115.05048:2936 121.10036:2591 133.0605:86567 135.11629:9734 141.0546:3323 145.10086:3929 147.11641:5750 149.13191:4330 154.11452:3230 155.06984:3150 155.084:3150 159.11588:4351 161.13176:10107 175.14767:4610 177.1266:2942 180.10114:5568 1…	135882	15499	90461	43184	nd	94935	nd	38173	107459	nd	21326	nd	nd	55415	82146	51685	59813	146867	9041	59202	29861	35314	74412	3198	40704	78990	nd	166693	98035	410419	nd	8623	70966
7.82_244.13	244.13	7.819	Asn-Ile	Organic acids and derivatives	Carboxylic acids and derivatives	Amino acids, peptides, and analogues	Peptides	di-peptides	3	HILIC ESI-	[M-H]-	C10H19N3O4	MQLZLIYPFDIDMZ-HAFWLYHUSA-N	CC[C@H](C)[C@@H](C(=O)O)NC(=O)[C@H](CC(=O)N)N	56991460	51.39516:2019 58.02853:2937 74.02348:4526 82.02775:2852 86.35545:2074 88.03915:74969 98.02347:23968 110.78265:2336 113.03443:34417 130.08629:119072 140.07069:2937 141.10201:18529 143.11809:15585 148.93423:2142 155.0817:11693 166.08549:2086 167.45033:2169 182.12923:2246 183.11313:11947 200.14003:14396 210.07593:12607 227.10332:40566 244.13022:123159	50314	23036	69504	110620	584	7338	2992	1585	2861	1341	17409	4632	6295	103871	85193	6347	2790	3747	9853	5273	11682	6629	113424	20490	34317	32348	35765	5575	26046	8105	72883	1479	nd
9.25_374.24	374.24	9.252	Asn-Ile-Lys	Organic acids and derivatives	Carboxylic acids and derivatives	Amino acids, peptides, and analogues	Peptides	tri-peptides	3	HILIC ESI+	[M+H]+	C16H31N5O5	ACKNRKFVYUVWAC-UHFFFAOYSA-N	CCC(C)C(C(=O)NC(CCCCN)C(=O)O)NC(=O)C(CC(=O)N)N	18219156	68.71923:2037 73.61438:2488 84.08083:62547 86.09641:113592 87.05511:3646 88.03932:4991 93.39951:2914 101.10744:3294 105.74294:2753 129.10211:89463 130.08612:65743 138.09094:3026 141.10204:21923 147.11264:133230 155.11722:36516 157.09689:4146 183.11272:43068 184.10878:2853 197.54266:15217 200.13939:201549 209.09181:10118 211.10809:4944 213.45065:2601 216.20409:2331 226.11804:2842 228.13432:29885 2…	7005	57046	52248	74679	nd	209631	1600	27406	5442	nd	nd	39233	nd	100628	5422	3724	4160	14809	11751	30592	19456	32327	292788	17613	16366	19183	7962	30976	8700	27032	186287	8758	nd
6.81_523.34	523.337	6.814	Asn-TriHydroxylated BA	Lipids and lipid-like molecules	Steroids and steroid derivatives	Bile acids, alcohols and derivatives	Glycinated bile acids and derivatives	conjugated bile acids	3	HILIC ESI+	[M+H]+	null	null	null		76.03922:3161 83.22148:2801 88.44711:2426 109.85139:2411 114.05487:3588 119.48041:2453 133.06078:10688 213.16507:2927 225.1665:3574 237.93922:2920 241.4742:2563 243.77136:2394 319.24289:20065 337.2518:39510 366.27997:5265 394.27383:54199 412.285:16580 469.30579:29072 487.31656:5789 487.57355:2812 508.36145:2709	138493	121233	51458	48666	nd	170192	3789	190798	233183	6885	90682	53670	36931	59905	80592	68516	75735	161665	96154	182063	68935	64330	220727	61071	126265	287591	5899	348788	299588	920571	3157	75108	233358
9.17_552.19	552.19	9.168	Blood Group A Trisaccharide	Organic oxygen compounds	Organooxygen compounds	Carbohydrates and carbohydrate conjugates	Oligosaccharides	tri-peptides	3	HILIC ESI+	[M+Na]+	C20H35NO15	HUMHYXGDUOGHTG-HEZXSMHISA-N	C[C@H]1[C@H]([C@H]([C@@H]([C@@H](O1)O[C@@H]2[C@H]([C@H]([C@H](OC2O)CO)O)O[C@@H]3[C@@H]([C@H]([C@H]([C@H](O3)CO)O)O)NC(=O)C)O)O)O	46906086	62.14431:2622 62.59334:2255 65.62171:2975 127.27229:2890 168.92783:2893 199.62946:2719 202.43071:3584 336.50577:2782 349.11148:3032 388.12463:3370 406.13162:125886 552.19:175632 552.28674:6127	227703	53799	146769	150392	nd	183513	nd	nd	nd	nd	141884	2018	nd	130596	nd	nd	nd	nd	nd	nd	nd	nd	12937	nd	nd	nd	nd	nd	240270	nd	59632	2741	nd
5.08_291.09	291.086	5.076	Catechin	Phenylpropanoids and polyketides	Flavonoids	Flavans	Flavan-3-ols	phenolic natural products	3	HILIC ESI+	[M+H]+	C15H14O6	PFTAWBLQPZVEMU-DZGCQCFKSA-N	C1[C@@H]([C@H](OC2=CC(=CC(=C21)O)O)C3=CC(=C(C=C3)O)O)O	9064	51.95423:2349 59.02978:2119 74.16802:2288 80.76243:2358 85.02862:2750 95.04907:3749 113.38147:2534 119.04906:8527 121.26749:2435 123.04393:217211 125.91154:1977 127.03905:2846 139.0388:402920 147.04379:70675 151.0387:11554 160.41821:2163 161.05965:18106 163.03853:5346 165.03911:3842 165.0545:81027 166.0863:2810 169.04913:5168 179.07016:13994 181.04977:3100 189.05405:9459 207.06473:51640 231.06598…	24647	34286	nd	3662	nd	440574	nd	nd	nd	nd	34302	13105	nd	40240	nd	nd	4752	82505	nd	nd	nd	nd	nd	2646	nd	3859	nd	3554	nd	nd	nd	6470	nd
6.09_512.3	512.304	6.087	Cys-TriHydroxylated BA	Lipids and lipid-like molecules	Steroids and steroid derivatives	Bile acids, alcohols and derivatives	Glycinated bile acids and derivatives	conjugated bile acids	3	HILIC ESI+	[M+H]+	null	null	null		71.16299:3040 81.0698:10540 85.06477:6077 93.07037:3010 95.08542:6055 101.78886:2743 105.07008:6505 107.08554:12298 109.10078:5324 117.9208:3164 121.10052:4589 122.02632:2791 122.35707:2754 123.96567:2693 133.10107:14176 135.11708:3765 140.0376:318666 145.1008:14255 147.11639:11640 157.10075:10604 159.11632:21683 161.1322:4184 169.10027:3348 171.11682:5904 173.13312:4304 175.14828:4549 183.11711:…	93775	14667	36696	68054	nd	35941	nd	nd	52749	nd	31745	6295	nd	81699	24571	nd	nd	nd	19353	nd	nd	nd	34214	nd	5501	32222	nd	89584	8852	4959	nd	20695	nd
7.75_323.10	323.098	7.745	Disaccharide 1	Organic oxygen compounds	Organooxygen compounds	Carbohydrates and carbohydrate conjugates	Oligosaccharides	sugars	3	HILIC ESI-	[M-H]-	C18H32O16	VAWYEUIPHLMNNF-OESPXIITSA-N	C([C@@H]1[C@H]([C@@H]([C@H]([C@H](O1)O[C@]2([C@H]([C@@H]([C@H](O2)CO)O)O)CO[C@]3([C@H]([C@@H]([C@H](O3)CO)O)O)CO)O)O)O)O	440080	59.01249:58353 60.29121:2315 63.3898:2167 71.01245:73725 72.99194:2407 73.02821:16196 75.00751:2373 81.03315:3068 83.0125:3017 85.02823:20479 87.00752:24165 89.02306:52335 95.0125:4222 97.02782:8122 99.0074:9375 99.04377:3168 101.02315:52482 111.00791:2679 112.98422:3727 113.02311:67848 115.03816:3211 119.03409:3663 125.02362:25664 127.03902:8086 129.01767:12081 131.03397:11301 137.02295:4793 139…	9952	12699	1672	20337	17037	580431	75147	24775	24383	8302	1211	45840	3532	28007	10440	71422	9437	12383	8168	72670	65605	6990	7786	9245	56463	45781	452632	21021	9234	38507	61444	20297	6944
9.07_343.12	343.125	9.068	Disaccharide 10	Lipids and lipid-like molecules	Fatty Acyls	Fatty acyl glycosides	Fatty acyl glycosides of mono- and disaccharides	sugars	3	HILIC ESI-	[M-H]-	C12H24O11	VQHSOMBJVWLPSR-WUJBLJFYSA-N	C([C@@H]1[C@H]([C@@H]([C@H]([C@H](O1)O[C@H]([C@@H](CO)O)[C@@H]([C@H](CO)O)O)O)O)O)O	493591	58.00439:2781 59.01244:349950 71.01245:250499 73.02794:9776 83.80589:2469 85.02815:22522 87.00726:14142 89.02309:339827 95.01235:12924 97.02728:3030 101.01579:4902 101.02312:137543 101.03064:4975 113.02318:93306 118.04995:2800 119.03375:84398 125.02365:2595 131.03381:24857 143.03375:36031 149.04471:9938 151.63766:2350 161.0444:36478 163.06021:40555 179.05528:141265 181.07082:49558 198.34592:10073…	129695	735483	61940	71373	nd	1808797	27444	nd	558	nd	589614	490635	347	142376	379501	289	nd	29310	23449	1466	581	528	25103	nd	814	31452	1390	22953	440	542	1318073	25817	10750
9.25_341.11	341.109	9.25	Disaccharide 11	Organic oxygen compounds	Organooxygen compounds	Carbohydrates and carbohydrate conjugates	Glycosyl compounds	sugars	3	HILIC ESI-	[M-H]-	C12H22O11	DLRVVLDZNNYCBX-ABXHMFFYSA-N	C([C@@H]1[C@@H]([C@@H]([C@H]([C@H](O1)OC[C@@H]2[C@H]([C@@H]([C@H](C(O2)O)O)O)O)O)O)O)O	440658	55.0176:12468 57.0331:4573 59.01244:367085 61.98687:4582 62.93718:2190 64.60316:2555 71.01245:344839 72.9916:3072 73.02809:45797 75.00734:4159 83.01236:24486 85.02818:34563 87.00741:18786 89.02307:423588 95.01276:18823 97.0288:8388 99.00743:4594 101.02309:396714 113.02314:180001 119.0337:35476 125.0233:11372 131.03383:31458 139.58119:2676 143.03375:61144 149.04494:15782 159.02872:4287 161.04463:8…	177407	41647	44620	109921	2001	2316880	6738	16659	3359	5687	195692	28537	5178	241653	10032	13545	3999	60779	13953	18707	18328	10437	31608	2061	10932	73632	39630	7927	3298	3035	904738	8003	2221
9.37_360.15	360.15	9.368	Disaccharide 12	Lipids and lipid-like molecules	Fatty Acyls	Fatty acyl glycosides	Fatty acyl glycosides of mono- and disaccharides	sugars	3	HILIC ESI+	[M+NH4]+	C12H22O11	AYRXSINWFIIFAE-GFRRCQKTSA-N	C([C@@H]1[C@@H]([C@@H]([C@H]([C@H](O1)OC[C@H]([C@H]([C@@H]([C@H](C=O)O)O)O)O)O)O)O)O	5460027	61.02863:22987 73.02824:13032 78.40562:2274 85.02844:100583 91.03302:4204 91.03902:74934 95.0442:2036 97.02862:25172 99.04374:3007 109.02821:2423 127.03889:45890 145.04956:97110 163.06006:120156 201.90334:4639 325.11011:5224	264803	116929	282500	201640	nd	999981	nd	nd	nd	nd	1021072	129714	nd	365586	3551	nd	1746	nd	2787	nd	nd	nd	218962	nd	nd	415789	nd	13219	nd	nd	264008	7596	nd
7.88_323.10	323.098	7.88	Disaccharide 2	Organic oxygen compounds	Organooxygen compounds	Carbohydrates and carbohydrate conjugates	Oligosaccharides	sugars	3	HILIC ESI-	[M-H]-	C18H32O16	VAWYEUIPHLMNNF-OESPXIITSA-N	C([C@@H]1[C@H]([C@@H]([C@H]([C@H](O1)O[C@]2([C@H]([C@@H]([C@H](O2)CO)O)O)CO[C@]3([C@H]([C@@H]([C@H](O3)CO)O)O)CO)O)O)O)O	440080	59.01247:89443 71.01249:119155 71.01693:4487 72.99179:11115 73.02812:27520 81.03329:3391 83.01282:4361 85.02809:34558 87.00745:22367 89.0231:83670 95.01278:12828 95.99506:2546 97.02835:11755 101.02314:110068 108.27306:2259 111.00716:3070 113.02317:91628 113.03162:4322 115.01615:2281 115.03922:3313 116.07062:2902 119.03419:4588 125.02311:18601 127.03911:4314 129.01839:3760 131.03418:11532 137.0233…	23976	71104	1741	16317	23288	802794	64225	33209	21811	73543	nd	94027	23372	86148	26583	80162	60029	55746	19639	103206	145003	93611	59113	17167	69349	79486	624761	12866	19822	52736	31162	30915	14008
8.01_365.11	365.105	8.012	Disaccharide 3	Organic oxygen compounds	Organooxygen compounds	Carbohydrates and carbohydrate conjugates	Glycosyl compounds	sugars	3	HILIC ESI+	[M+Na]+	C12H22O11	CZMRCDWAGMRECN-UGDNZRGBSA-N	C([C@@H]1[C@H]([C@@H]([C@H]([C@H](O1)O[C@]2([C@H]([C@@H]([C@H](O2)CO)O)O)CO)O)O)O)O	5988	52.47118:2328 60.46553:2194 80.29086:2299 85.6529:2229 94.66896:2178 185.04205:33141 203.05266:111963 286.23538:2179 315.10123:2256 365.10522:293491	216778	55157	17121	749179	1659	15986322	5846	36321	4804	6242	144954	26369	nd	1034565	5648	14040	7065	150447	24198	14381	29084	7121	21443	3904	18676	259019	169521	7162	3022	7396	1108257	59361	nd
8.04_341.11	341.109	8.044	Disaccharide 4	Organic oxygen compounds	Organooxygen compounds	Carbohydrates and carbohydrate conjugates	Glycosyl compounds	sugars	3	HILIC ESI-	[M-H]-	C12H22O11	DLRVVLDZNNYCBX-RTPHMHGBSA-N	C([C@@H]1[C@H]([C@@H]([C@H]([C@H](O1)OC[C@@H]2[C@H]([C@@H]([C@H](C(O2)O)O)O)O)O)O)O)O	439193	51.05252:3289 51.15119:2210 57.03308:3415 58.00449:2836 59.01245:393716 71.01245:380007 73.02814:36120 75.28663:2599 83.01234:14513 83.87763:2356 85.02806:33128 87.00744:12789 89.02306:436657 95.01248:37952 97.02814:5160 99.00731:5869 101.0231:266669 104.49095:2131 109.94073:2360 113.02313:287157 119.0335:29992 125.02314:5493 129.01811:28691 131.03395:29255 131.63071:2948 143.03375:48497 149.0444…	25322	20994	1186	105812	2318	2590543	4443	84943	1381	4786	36190	14735	34652	280899	2054	9293	2263	26600	4974	11058	13179	8283	5193	527	9535	31008	251833	12500	2335	64240	284922	7575	1217
8.40_371.12	371.12	8.397	Disaccharide 5	Lipids and lipid-like molecules	Fatty Acyls	Fatty acyl glycosides	Fatty acyl glycosides of mono- and disaccharides	sugars	3	HILIC ESI-	[M+HCO2]-	C12H22O10	CPYCUQCIDSHOHI-IFLAJBTPSA-N	C[C@H]1[C@@H]([C@H]([C@H]([C@@H](O1)OC[C@H]([C@H]([C@@H]([C@H](C=O)O)O)O)O)O)O)O	5460038	51.18996:2062 59.01245:39657 59.01522:2318 64.14597:1960 64.73314:2006 71.01275:10045 73.02801:17394 86.24669:2251 89.02325:12182 101.02318:32504 103.03867:18808 119.0341:5477 128.90828:2513 131.03448:3829 143.03435:5261 145.05032:2536 163.06029:45369 205.07167:11630 224.30765:2492 273.83154:2423 365.81662:2466	44791	475048	6413	17463	1637	163885	21790	8427	nd	378	361143	413704	35049	14662	3926	4263	1842	10072	59526	46431	55066	45462	27697	955	10567	40505	4594	17203	11715	1610	19446	25842	10328
8.44_365.11	365.105	8.439	Disaccharide 6	Organic oxygen compounds	Organooxygen compounds	Carbohydrates and carbohydrate conjugates	Glycosyl compounds	sugars	3	HILIC ESI+	[M+Na]+	C12H22O11	CZMRCDWAGMRECN-UGDNZRGBSA-N	C([C@@H]1[C@H]([C@@H]([C@H]([C@H](O1)O[C@]2([C@H]([C@@H]([C@H](O2)CO)O)O)CO)O)O)O)O	5988	56.33897:6755 70.98515:6378 102.57177:8157 185.04218:1151658 199.78236:16890 203.05269:2492962 347.09509:16050 347.39758:8448 349.02145:8474 365.10535:5237028	15994827	163797	3444917	5754214	92969	85333285	128020	700115	808621	108800	4150630	269587	235134	5685009	894609	1499616	587270	1964008	383871	127963	139104	187217	1430581	160477	519273	3168719	263913	1406404	577425	465851	14097065	1106855	9531114
8.76_365.11	365.105	8.759	Disaccharide 7	Organic oxygen compounds	Organooxygen compounds	Carbohydrates and carbohydrate conjugates	Glycosyl compounds	sugars	3	HILIC ESI+	[M+Na]+	C12H22O11	CZMRCDWAGMRECN-UGDNZRGBSA-N	C([C@@H]1[C@H]([C@@H]([C@H]([C@H](O1)O[C@]2([C@H]([C@@H]([C@H](O2)CO)O)O)CO)O)O)O)O	5988	56.29815:2113 59.94268:2268 104.20998:2367 185.04192:38196 196.4894:2180 203.05251:115953 211.62674:2533 305.08414:4951 347.09335:2823 365.10504:753048	5723238	641137	944726	3135308	109547	43022437	211075	1113614	380964	402990	3264176	521297	167629	5870464	736250	1495023	844224	4141241	1213843	286429	101480	252187	2172895	179625	385084	14579310	301848	433640	185478	253841	8344800	11214149	622625
8.88_325.11	325.112	8.879	Disaccharide 8	Lipids and lipid-like molecules	Fatty Acyls	Fatty acyl glycosides	Fatty acyl glycosides of mono- and disaccharides	sugars	3	HILIC ESI+	[M+H-H2O]+	C12H22O11	DKXNBNKWCZZMJT-WUJBLJFYSA-N	C([C@@H]1[C@H]([C@@H]([C@H]([C@H](O1)O[C@H]([C@@H](CO)O)[C@@H]([C@H](C=O)O)O)O)O)O)O	181526	53.03903:11586 55.01811:19615 57.03086:4664 57.03378:49807 61.02872:121766 66.32055:2531 66.34161:2649 68.7812:2462 69.03364:154503 71.04922:27518 73.02852:59691 79.77925:2562 81.03357:47126 83.01314:2593 85.02848:1893305 87.04428:37293 91.03906:151122 97.02852:365580 99.04409:69718 99.05082:4541 101.0237:5418 103.03922:18654 109.02848:158503 115.03885:23218 127.03902:575706 129.56834:2626 145.04…	28096	15467	148452	61249	nd	516326	1621	2731	nd	nd	2136600	5959	nd	110347	3266	2588	11688	12330	8786	5686	nd	2016	76867	2824	nd	64358	nd	nd	nd	4015	7836946	10369	4141
8.97_343.12	343.123	8.966	Disaccharide 9	Organic oxygen compounds	Organooxygen compounds	Carbohydrates and carbohydrate conjugates	Glycosyl compounds	sugars	3	HILIC ESI+	[M+H]+	C12H22O11	GUBGYTABKSRVRQ-JMNOBNSJSA-N	C([C@@H]1[C@@H]([C@@H]([C@H](C(O1)O[C@@H]2[C@H](OC([C@@H]([C@H]2O)O)O)CO)O)O)O)O	69301022	57.03376:125807 61.02866:3257434 69.03373:482100 73.02848:1381756 81.03339:81108 85.0285:10466728 87.0442:117780 91.03905:6888695 97.0285:3098466 99.04388:440632 103.03902:258017 109.02852:439621 115.03896:439355 117.05422:85320 127.03899:4155189 145.04953:7576900 163.06004:7861278 178.50826:80398 202.10742:114740 216.13161:83555 299.74994:81519	36446	3227	355793	115813	nd	256417	1875	2264	nd	8154	3310565	nd	3756	94221	nd	2492	5765	3405	nd	2731	2299	nd	28787	nd	nd	69480	nd	nd	nd	nd	15770605	3211	8789
8.02_176.09	176.091	8.017	DL-.alpha.-Aminopimelic acid	Organic acids and derivatives	Carboxylic acids and derivatives	Amino acids, peptides, and analogues	Amino acids and derivatives	dicarboxylic acids	3	HILIC ESI+	[M+H]+	C7H13NO4	JUQLUIFNNFIIKC-UHFFFAOYSA-N	C(CCC(=O)O)CC(C(=O)O)N	101122	63.28712:1899 68.11215:1729 68.62315:1804 74.66996:1966 84.08072:4568 85.02844:3254 101.05925:3412 111.60252:2013 112.07568:11467 130.08612:62733 158.08134:15377 176.09177:60618	22071	162663	50170	120531	71638	150981	58295	73589	39726	41488	131910	146589	67994	413125	37573	25814	39554	42921	38991	163402	178151	150874	72853	62408	239847	43173	509596	23608	54839	143675	37485	37531	54010
0.75_271.23	271.228	0.752	FA 16:0;(2OH)	Lipids and lipid-like molecules	Fatty Acyls	Fatty acids and conjugates	Long-chain fatty acids	hydroxy FAs	3	CSH ESI-	[M-H]-	C16H32O3	JGHSBPIZNUXPLA-UHFFFAOYSA-N	O=C(O)C(O)CCCCCCCCCCCCCC	92836	93.76122:3380 116.89722:3602 141.12733:4395 164.39752:4074 172.53523:3664 197.19041:7284 199.66734:14594 223.20628:74942 225.22188:3144165 238.86763:6623 253.21718:96572 256.03873:6777 269.21103:34619 271.22772:5870008	8926985	2771901	709984	5640682	400894	3084926	668648	13277876	8891291	756265	1670665	2377909	293453	2460764	878348	1016706	6722573	5586513	745738	9876672	18398848	7578164	5709221	1362538	6207894	1179342	1710247	3024031	3864769	20986397	269446	770928	845279
8.17_418.11	418.112	8.17	Galacto-N-biose	Organic oxygen compounds	Organooxygen compounds	Carbohydrates and carbohydrate conjugates	Aminosaccharides	sugars	3	HILIC ESI-	[M+Cl]-	C14H25NO11	HMQPEDMEOBLSQB-UITYFYQISA-N	CC(=O)N[C@@H]1[C@H]([C@H]([C@H](OC1O)CO)O)O[C@H]2[C@@H]([C@H]([C@H]([C@H](O2)CO)O)O)O	441248	51.71713:2215 55.01759:72399 56.15023:2302 58.02854:57504 59.01252:58824 71.01237:19546 83.01254:256170 85.83588:2470 86.0239:3530 87.00716:2563 88.54678:2061 89.0235:28861 89.02874:3738 89.72621:2273 101.02319:11274 112.03931:3860 113.02316:10176 119.03389:5780 124.46925:2961 126.41903:2160 133.20374:2934 140.03456:47828 142.04993:528378 143.03381:3692 161.04492:4898 179.05553:28673 201.76933:49…	189021	4081795	3230	19328	nd	23148	74904	2894	742	1183	16983	3315250	876382	1076	381042	6881	nd	102363	116934	5834	6615	10028	1544547	5232	72460	3664864	1497	378928	1553892	22544	18982	2973172	24314
7.62_215.03	215.032	7.624	Galactose (monosaccharide)	Organic oxygen compounds	Organooxygen compounds	Carbohydrates and carbohydrate conjugates	Monosaccharides	sugars	3	HILIC ESI-	[M+Cl]-	C6H12O6	WQZGKKKJIJFFOK-PHYPRBDBBU	O[C@H]1[C@@H](O)[C@H](O[C@H](O)[C@@H]1O)CO		59.01253:782600 62.27319:19705 71.0087:31381 71.01255:547244 74.76286:22940 85.02808:24946 89.02315:863038 101.02294:131024 113.02349:200391 119.03419:37610 131.03381:48926 139.92647:23576 143.03337:47960 149.04433:32208 161.04446:46956 179.05505:257821 205.24643:29133 215.01038:38010 215.03062:145874	6407862	11565712	1846091	3556231	32662	16381174	95004	68380	33539	53335	12436884	159513	272881	3742033	1778776	137116	115198	189393	4207139	127287	39985	60358	2689221	122057	317914	1284658	236434	183508	71304	191992	52844795	52975	110829
7.78_104.07	104.07	7.776	gamma-Aminobutyric acid and n-methylalanine	Organic acids and derivatives	Carboxylic acids and derivatives	Amino acids, peptides, and analogues	Amino acids and derivatives	di-peptides	3	HILIC ESI+	[M+H]+	C4H9NO2	GDFAOVXKHJXLEI-VKHMYHEASA-N	CC(C(=O)O)NC	5288725	66.45704:10004 69.03359:125747 84.74315:9957 86.05996:114057 87.04415:380154 104.07049:9289	132228	650461	57593	125570	471855	238785	205809	526469	466599	235727	245881	488047	826572	153323	478312	379428	296592	454541	414161	457874	524500	808736	111442	688013	543529	7556819	747849	156703	368961	308665	2572234	1233924	572269
6.07_521.36	521.358	6.068	Gln-Dihydroxylated BA	Lipids and lipid-like molecules	Steroids and steroid derivatives	Bile acids, alcohols and derivatives	Glycinated bile acids and derivatives	conjugated bile acids	3	HILIC ESI+	[M+H]+	null	null	null		51.25141:2186 74.22304:2315 77.6462:2586 83.06035:11395 84.04453:16517 85.06484:5114 85.46005:2872 85.46558:2858 86.09634:3012 101.07104:10680 109.1009:3350 129.06569:65396 129.07561:4631 130.04987:56583 147.0762:86121 149.13271:2513 155.0695:4002 156.89044:2527 199.14893:2956 201.1642:3384 211.14771:3216 314.91119:2807 321.25821:21993 339.26733:34766 468.30847:12007 485.3364:70454 503.34799:42034	13425	4910	5561	3862	nd	27380	nd	nd	22584	3410	122943	nd	69055	nd	nd	14895	128306	93102	3869	nd	65830	19666	110957	nd	4766	12305	nd	162851	294415	286521	nd	12314	nd
7.74_258.15	258.146	7.739	Gln-Leu	Organic acids and derivatives	Carboxylic acids and derivatives	Amino acids, peptides, and analogues	Peptides	di-peptides	3	HILIC ESI-	[M-H]-	C11H21N3O4	ARPVSMCNIDAQBO-JGVFFNPUSA-N	CC(C)CC(C(=O)O)NC(=O)C(CCC(=O)N)N		50.44287:2297 50.88475:2001 58.02852:22396 59.0125:2376 62.36364:1994 70.02846:30762 74.02328:17832 88.03915:110020 107.69115:2118 116.43749:2500 127.05004:18173 130.08624:322489 134.14957:2248 140.07101:2295 141.10252:17282 143.11794:57961 155.11816:20290 157.13403:8942 169.09726:27210 182.81743:2606 183.1147:3186 196.14494:64781 197.129:74736 202.20306:3074 214.15587:48212 241.11856:25894 258.1…	18118	23835	28994	70940	nd	nd	3247	7569	4454	nd	5242	8625	8571	52574	36289	3821	1248	6012	18559	18090	5104	5388	76497	26609	21584	31935	22255	8422	19622	5611	130389	7390	1465
9.20_416.26	416.261	9.204	Gln-Leu-Arg	Organic acids and derivatives	Carboxylic acids and derivatives	Amino acids, peptides, and analogues	Peptides	tri-peptides	3	HILIC ESI+	[M+H]+	C17H33N7O5	HWEINOMSWQSJDC-UHFFFAOYSA-N	CC(C)CC(C(=O)NC(CCCN=C(N)N)C(=O)O)NC(=O)C(CCC(=O)N)N	18220699	50.48236:2982 51.32148:2544 60.05597:32118 61.74281:2131 65.60271:2171 65.73648:2296 69.06989:2688 70.06523:69163 72.08073:5180 83.06046:15698 84.04465:25083 84.08049:3071 84.77094:2571 86.09643:51715 87.14237:2475 97.15194:2419 101.07093:33104 112.08705:35484 113.07069:14213 114.10223:3440 115.08671:25436 116.07079:79947 129.06596:62644 130.09697:13494 133.09698:5983 133.11914:2355 141.06595:506…	59337	nd	nd	125441	nd	nd	nd	29644	nd	nd	nd	19901	nd	121673	3726	3057	6056	3055	nd	2535	nd	2855	65461	4068	nd	29132	nd	3369	5650	11655	266454	nd	3714
6.83_537.35	537.353	6.834	Gln-TriHydroxylated BA	Lipids and lipid-like molecules	Steroids and steroid derivatives	Bile acids, alcohols and derivatives	Glycinated bile acids and derivatives	conjugated bile acids	3	HILIC ESI+	[M+H]+	null	null	null		54.85717:2388 59.01237:2475 68.28992:2489 83.06052:3338 84.04433:10837 101.07095:5043 129.06589:35369 130.0497:39743 136.3533:2564 147.07623:62954 199.14619:4509 209.13214:6369 213.16408:3388 227.14381:10930 227.18005:3934 229.15646:3616 255.17374:3312 295.20673:5941 319.24191:30205 337.25226:79237 343.18774:4273 361.20114:19009 424.11899:3196 465.31113:3695 466.2966:5662 472.65485:2765 483.32104…	nd	nd	nd	nd	nd	nd	nd	nd	3382	nd	nd	nd	29087	nd	nd	nd	12481	30314	nd	nd	nd	3265	92884	18159	nd	nd	nd	11139	61184	50252	nd	8861	nd
9.76_347.19	347.192	9.758	Glu-Ala-Lys	Organic acids and derivatives	Carboxylic acids and derivatives	Amino acids, peptides, and analogues	Peptides	tri-peptides	3	HILIC ESI+	[M+H]+	C14H26N4O6	JJKKWYQVHRUSDG-UHFFFAOYSA-N	CC(C(=O)NC(CCCCN)C(=O)O)NC(=O)C(CCC(=O)O)N	18220141	55.01645:2278 55.83091:2487 60.52896:2236 84.04457:9492 84.08087:158429 101.10735:11460 102.05493:10552 107.26968:2565 112.75243:2594 127.08703:2325 128.07066:2630 129.1022:152276 130.0862:101312 147.11282:112557 155.08159:46071 164.97661:2587 173.09216:35215 183.07648:13638 200.13948:13860 201.0865:5007 201.12276:4417 218.14969:57101 232.16553:4180 240.13509:4395 284.16055:5326 301.1886:2870 312…	nd	51641	6792	7431	nd	nd	nd	41654	nd	7110	3103	38887	nd	92683	nd	3901	3659	15694	10700	51751	20174	70692	249383	126946	4171	31488	nd	nd	nd	29831	334289	15153	2869
6.20_522.34	522.342	6.203	Glu-Dihydroxylated BA	Organic acids and derivatives	Carboxylic acids and derivatives	Amino acids, peptides, and analogues	Peptides	carnitines	3	HILIC ESI+	[M+H]+	C29H47NO7	FKCULOCMKCMBOQ-GKFVBPDJSA-N	CC/C=C\C/C=C\C/C=C\C/C=C\CCC(=O)OC(COCCC(C(=O)[O-])[N+](C)(C)C)COC(=O)CC		67.05438:3681 81.06976:18822 81.90036:2681 83.08529:4562 84.04433:52466 85.06472:11551 93.06979:11649 95.08546:17344 102.05497:52439 105.06947:5985 107.0853:22901 109.1011:15541 114.36512:3307 119.08554:12078 119.59956:2845 121.101:17735 123.08069:3469 123.11658:4545 125.09582:6884 130.03879:5434 130.0497:146548 131.08557:4390 133.10098:18079 133.94034:2753 135.11673:35204 145.10129:13418 147.116…	nd	384016	nd	nd	nd	14094	47159	120476	323722	424313	18812	356776	526325	nd	nd	14989	117243	73248	32241	82399	367912	135064	11975	nd	103033	81456	108099	42625	233371	214887	nd	41010	54562
7.89_259.13	259.13	7.887	Glu-Leu	Organic acids and derivatives	Carboxylic acids and derivatives	Amino acids, peptides, and analogues	Peptides	di-peptides	3	HILIC ESI-	[M-H]-	C11H20N2O5	YBAFDPFAUTYYRW-YUMQZZPRSA-N	CC(C)C[C@@H](C(=O)O)NC(=O)[C@H](CCC(=O)O)N	9856500	75.92186:2269 82.02852:19830 84.0444:5147 88.03886:2586 100.03945:13672 101.07117:5203 102.0548:3612 112.03938:2805 114.09083:2610 126.0909:2340 127.05032:13119 128.03418:74335 130.08624:763980 131.08998:3606 140.07065:2898 141.10262:17101 143.83478:2297 154.1227:10180 157.99864:2273 169.09616:4199 169.13345:10130 171.14949:78862 180.10201:21812 181.09775:3048 184.05327:2718 187.10851:2951 197.12…	108295	206358	141182	182323	3298	179629	25369	22007	43149	16459	168300	61303	30975	191732	198074	103806	17702	36992	128089	71807	55514	42967	225615	55729	86102	146634	81961	125948	112044	66876	103320	32888	41913
9.20_389.24	389.239	9.199	Glu-Leu-Lys	Organic acids and derivatives	Carboxylic acids and derivatives	Amino acids, peptides, and analogues	Peptides	tri-peptides	3	HILIC ESI+	[M+H]+	C17H32N4O6	IVGJYOOGJLFKQE-UHFFFAOYSA-N	CC(C)CC(C(=O)NC(CCCCN)C(=O)O)NC(=O)C(CCC(=O)O)N	18220327	52.24228:2453 55.03424:2627 69.06974:3515 84.04428:18384 84.08085:191578 86.09647:123928 99.28106:2346 101.10696:10804 102.05492:28421 108.17016:2558 116.06996:2678 124.69797:2233 129.05748:2853 129.06607:52587 129.1022:208873 130.08624:216544 141.06549:3917 147.11273:299325 170.1179:18774 197.12851:117801 200.92348:2687 201.20499:4600 201.22292:2726 213.12338:3888 215.13916:180234 225.12263:1125…	123800	308033	175246	95977	nd	50666	1337	61406	16943	37781	59701	256715	18295	413058	84063	64866	65502	79690	111653	226938	93118	136418	687289	94807	95673	111367	59976	28851	88565	171390	454453	34094	29217
7.13_538.34	538.338	7.125	Glu-TriHydroxylated BA	Lipids and lipid-like molecules	Steroids and steroid derivatives	Bile acids, alcohols and derivatives	Glycinated bile acids and derivatives	conjugated bile acids	3	HILIC ESI+	[M+H]+	null	null	null		56.67404:2394 81.06995:4378 84.04459:15941 85.06525:4206 87.26757:2681 95.08546:4484 102.05486:14494 107.08579:3506 109.1013:3564 123.08024:2862 130.05017:46154 133.10115:4432 145.10147:3677 148.06055:115078 155.05145:2762 159.11685:3792 171.11847:2556 185.1328:4127 199.14806:6276 201.16438:3347 209.13298:30529 209.20514:3842 211.1492:12584 213.16364:20374 223.14873:4311 225.16385:4571 227.14288:…	nd	154811	nd	nd	nd	nd	6161	108263	111949	44586	nd	155378	148109	nd	nd	nd	22119	18011	43677	44463	79444	51937	17690	53517	9444	15755	14598	5189	14103	93119	nd	64196	16239
9.85_361.18	361.183	9.847	Gly-Glu-Arg	Organic acids and derivatives	Carboxylic acids and derivatives	Amino acids, peptides, and analogues	Peptides	tri-peptides	3	HILIC ESI+	[M+H]+	C13H24N6O6	DHDOADIPGZTAHT-UHFFFAOYSA-N	C(CC(C(=O)O)NC(=O)C(CCC(=O)O)NC(=O)CN)CN=C(N)N	18220983	60.05586:19308 70.0652:59657 72.08046:13252 78.93671:2266 84.04416:3061 84.08034:11831 86.09631:3036 88.03905:2860 102.05462:11800 112.08704:18491 113.0703:3946 114.10217:2760 115.08631:18838 116.07072:35464 116.14942:2113 124.03851:4067 129.10233:17449 129.11177:2444 130.09645:8382 133.09644:2531 137.31531:2428 141.06583:30499 147.11197:5332 154.06053:3799 157.10797:2785 158.0923:48687 159.07625…	2116	16267	2975	15931	nd	16926	nd	6550	nd	nd	53576	5548	3427	87182	2707	nd	nd	3620	1956	2917	6998	5787	293995	21546	2668	16992	nd	nd	nd	12436	222181	2114	nd
8.93_345.22	345.224	8.931	Gly-Ile-Arg	Organic acids and derivatives	Carboxylic acids and derivatives	Amino acids, peptides, and analogues	Peptides	tri-peptides	3	HILIC ESI+	[M+H]+	C14H28N6O4	SXJHOPPTOJACOA-UHFFFAOYSA-N	CCC(C)C(C(=O)NC(CCCN=C(N)N)C(=O)O)NC(=O)CN	18221040	60.0526:3241 60.05585:77975 70.06525:191776 71.04905:10750 72.08092:22544 74.05994:15167 75.05536:29611 77.12213:2827 83.76427:2418 84.08066:4218 86.09654:62185 88.07546:14734 95.27003:2417 112.08691:63480 113.07098:2879 114.10239:5319 115.0867:41363 115.0955:4002 116.07071:75697 119.08186:20604 121.69538:2678 123.12776:2586 129.10199:10601 130.09743:17449 133.09744:11486 137.91234:2820 140.08192…	272941	376966	170989	354914	nd	nd	1504	69864	201943	nd	191745	170825	8731	1334581	272871	154669	97554	351698	220703	34629	25275	76668	2953828	195644	67909	231675	8358	223142	90266	157018	9635242	112491	121012
8.85_175.07	175.072	8.852	Gly-Thr	Organic acids and derivatives	Carboxylic acids and derivatives	Amino acids, peptides, and analogues	Peptides	di-peptides	3	HILIC ESI-	[M-H]-	C6H12N2O4	OLIFSFOFKGKIRH-WUJLRWPWSA-N	C[C@H]([C@@H](C(=O)O)NC(=O)CN)O	111257	51.37787:8470 58.02843:92894 74.02347:1962072 81.34753:10009 85.02861:10092 85.03969:62558 87.05518:1171852 88.03923:362641 90.8478:8783 101.07081:21096 113.02373:16162 113.03423:13345 115.03885:36226 131.04518:4808682 131.08012:139883 132.08546:413293 145.06087:733675 146.96016:10251 157.01332:47649 157.06158:18612 175.02405:12907 175.07205:534508	912340	3442340	1463751	1908844	27295	574650	106574	167359	161622	90792	1239594	1040369	207617	1506704	1637586	386595	63725	180053	989995	251896	260608	129311	2395506	742066	429379	749122	405981	369632	619859	220000	243775	710179	52827
8.76_162.08	162.076	8.76	hexosamine 1	Organic oxygen compounds	Organooxygen compounds	Carbohydrates and carbohydrate conjugates	Monosaccharides	hexosamines	3	HILIC ESI+	[M+H-H2O]+	C6H13NO5	FZHXIRIBWMQPQF-KVTDHHQDSA-N	C([C@H]([C@H]([C@@H]([C@@H](C=O)N)O)O)O)O	123961	55.01824:2455 55.82716:1956 56.04965:4904 60.04461:56446 61.02859:2970 69.03358:11889 70.06532:4083 72.04447:116753 73.02824:2408 74.06007:2445 80.04955:2534 81.72733:1783 84.04441:75460 85.02843:36304 86.05992:3216 88.03935:4839 90.05476:2192 96.0444:14392 97.02852:31593 98.05999:23216 100.73193:1847 102.05476:8118 103.03884:2717 108.04483:2408 114.05518:20357 115.0388:11707 116.07122:3565 116.1…	573922	555738	265331	365975	61346	1342416	93197	226447	131891	34311	278032	325129	129352	671465	161054	124379	171132	444377	193622	213689	144410	238973	266335	79341	276326	629635	178970	261978	119090	203628	383113	538597	300972
7.24_220.08	220.082	7.242	hexosamine monosaccharide 1	Organic oxygen compounds	Organooxygen compounds	Carbohydrates and carbohydrate conjugates	Aminosaccharides	hexosamines	3	HILIC ESI-	[M-H]-	C8H15NO6	OVRNDRQMDRJTHS-ZTVVOAFPSA-N	CC(=O)N[C@H]1[C@H]([C@@H]([C@H](OC1O)CO)O)O	439281	52.14694:2687 54.01911:2896 55.01752:17917 58.00459:12752 58.02851:15371 59.01244:888729 64.70265:2914 71.01246:136663 72.99175:16511 82.02857:12837 83.00774:2874 83.01248:27662 87.00784:3386 89.02307:124589 89.63819:2935 100.03906:370064 101.02309:233108 119.03372:109109 133.24251:3124 142.05048:5342	378826	3275626	41091	11237	440	224115	72495	24722	160398	651	1094	2246786	211587	83564	446244	15695	1286	15737	611255	336126	3750	11763	942220	92474	735837	1223418	28575	208781	1096535	32937	166210	1615545	694741
8.40_188.06	188.056	8.402	hexosamine monosaccharide 2	Organic acids and derivatives	Carboxylic acids and derivatives	Amino acids, peptides, and analogues	Amino acids and derivatives	sugars	3	HILIC ESI-	[M-H]-	C7H11NO5	RFMMMVDNIPUKGG-YFKPBYRVSA-N	CC(=O)N[C@@H](CCC(=O)O)C(=O)O	70914	54.17667:2053 58.02849:36944 59.01247:188463 67.26662:2823 67.49938:1995 72.00775:14777 72.04414:2621 74.02314:3422 84.04417:8266 84.93739:26822 85.94521:2821 86.95302:3014 98.02349:14609 98.05992:3443 99.9245:156198 100.03942:16898 100.07547:87867 100.92503:6871 100.93237:34355 101.94003:2654 102.05478:327139 103.0498:2524 114.09054:2727 115.91946:93972 116.07046:47674 116.91892:3546 116.92732:6…	5059	16544	3813	4181	2753	185390	3629	8812	6169	512	1991	14959	3550	1319	2133	1969	3258	1813	28512	89257	81598	40909	7366	2864	104769	37901	15032	11804	53128	20005	1262	24147	3539
7.1_546.35	546.353	7.103	His-TriHydroxylated BA	Lipids and lipid-like molecules	Steroids and steroid derivatives	Bile acids, alcohols and derivatives	Glycinated bile acids and derivatives	conjugated bile acids	3	HILIC ESI+	[M+H]+	null	null	null		60.20371:2469 60.62537:2370 62.85312:2847 78.39061:2477 81.55609:2499 90.73627:2700 95.06034:4959 110.07124:153100 112.087:3069 115.94914:2624 145.18401:2505 148.48508:2631 152.32266:2650 156.07661:334641 213.16428:2911 227.14078:3475 229.15665:3079 237.16301:3905 247.94897:3277 278.93661:2684 319.24173:16305 337.25195:43717 446.3179:17495 447.01505:2725 448.3251:3160 474.31128:4056 492.32114:117…	nd	25183	nd	nd	nd	nd	1271	17384	57706	nd	nd	nd	3311	nd	nd	nd	4600	50625	8246	15861	15335	6748	72541	53667	10182	nd	nd	17157	50785	28667	nd	28440	19104
9.19_331.23	331.234	9.194	Ile-Ala-Lys	Organic acids and derivatives	Carboxylic acids and derivatives	Amino acids, peptides, and analogues	Peptides	tri-peptides	3	HILIC ESI+	[M+H]+	C15H30N4O4	RWIKBYVJQAJYDP-UHFFFAOYSA-N	CCC(C)C(C(=O)NC(C)C(=O)NC(CCCCN)C(=O)O)N	18221611	71.35679:2588 80.83396:2355 84.08085:14242 86.0964:30086 108.54886:2225 129.10216:24092 130.08627:18971 147.11256:38203 157.13347:12651 164.49716:2365 185.12833:5142 200.13873:2871 200.63341:4600 218.14922:31074 300.68607:2300 331.23721:36184	53141	nd	nd	46676	nd	nd	nd	4370	nd	nd	nd	3927	nd	81159	nd	nd	nd	nd	2519	3944	2422	3491	137382	32895	nd	11754	5851	nd	2414	nd	1243521	3462	nd
8.26_244.13	244.13	8.261	Ile-Asn	Organic acids and derivatives	Carboxylic acids and derivatives	Amino acids, peptides, and analogues	Peptides	di-peptides	3	HILIC ESI-	[M-H]-	C10H19N3O4	HZYHBDVRCBDJJV-HAFWLYHUSA-N	CC[C@H](C)[C@@H](C(=O)N[C@@H](CC(=O)N)C(=O)O)N	7016079	58.02853:102620 58.7157:6265 70.02853:310145 74.02336:127645 96.00785:541574 101.07072:49396 113.0346:46873 114.01848:1200730 115.08647:29692 116.07023:26407 129.10222:1514956 129.59274:7817 130.08617:31818 131.04521:151249 132.33937:6266 141.10229:52837 155.11795:109042 169.09752:12250 182.12866:75124 183.11334:15598 184.10762:13226 198.47401:41788 200.13991:204807 226.11951:2634321 227.1031:841…	70460	158344	233545	197135	5076	94409	9780	5970	7937	7753	95831	30801	22455	202704	394351	42206	1224	6734	209318	39510	28734	13611	444753	53839	20108	151629	77493	28537	94982	28185	157422	109227	7091
8.04_245.11	245.114	8.037	Ile-Asp	Organic acids and derivatives	Carboxylic acids and derivatives	Amino acids, peptides, and analogues	Peptides	di-peptides	3	HILIC ESI-	[M-H]-	C10H18N2O5	WKXVAXOSIPTXEC-HAFWLYHUSA-N	CC[C@H](C)[C@@H](C(=O)N[C@@H](CC(=O)O)C(=O)O)N	44298592	69.00729:20331 69.75768:19280 71.01248:717400 72.04385:38991 74.37659:18447 80.41703:18169 88.0391:1557875 89.89847:18200 96.992:77359 103.93785:22103 113.09763:21866 114.01858:32295 115.00245:2496040 115.92078:18669 129.10214:6983703 130.08612:2502665 132.02928:122468 155.11781:40334 157.13354:443774 165.10193:30029 176.07346:24163 183.11304:290788 201.12387:3917372 203.10085:25194 209.09268:167…	123771	84877	171198	126482	5357	336688	13136	12781	22199	10768	174415	49414	38827	143006	282710	53369	1488	24362	36832	86510	92586	47722	342322	54307	361677	36017	234892	26217	77879	57309	135691	10934	26586
8.12_258.15	258.146	8.119	Ile-Gln	Organic acids and derivatives	Carboxylic acids and derivatives	Amino acids, peptides, and analogues	Peptides	di-peptides	3	HILIC ESI-	[M-H]-	C11H21N3O4	CNPNWGHRMBQHBZ-ZKWXMUAHSA-N	CC[C@H](C)[C@@H](C(=O)N[C@@H](CCC(=O)N)C(=O)O)N	7020101	58.02842:2701 73.88403:2262 82.02842:10196 83.06006:20166 84.80362:2768 88.03892:3892 98.06:2553 101.07017:2387 109.03973:4499 127.05011:252233 128.03395:36923 129.10213:191540 130.08612:19032 145.06078:114014 146.32953:2567 155.11813:15641 163.74129:2174 169.13365:9335 187.10754:3222 196.14482:465996 197.12886:10754 214.15569:102765 222.12445:55238 224.68469:2473 240.13512:414381 241.12029:11129…	298468	318900	631280	522732	1577	317270	8400	16504	18609	9448	245760	85268	72419	616891	1306069	113410	1157	18528	435536	77513	100346	51571	1265315	151042	108954	330326	260802	22259	187665	97331	207958	262687	19824
8.82_269.16	269.16	8.821	Ile-His	Organic acids and derivatives	Carboxylic acids and derivatives	Amino acids, peptides, and analogues	Peptides	di-peptides	3	HILIC ESI+	[M+H]+	C12H20N4O3	QNBYCZTZNOVDMI-HGNGGELXSA-N	CC[C@H](C)[C@@H](C(=O)N[C@@H](CC1=CN=CN1)C(=O)O)N	7019080	58.01847:2007 66.08874:2383 78.89666:2157 82.66925:2085 86.09649:52904 95.06032:2624 108.65361:2290 110.07129:113999 138.06642:3611 156.07672:500813 161.59364:2381 166.06085:26445 178.13329:8458 223.15553:12996 234.12344:12574 251.15048:57636 251.19925:4878 269.16086:157186	624530	1030243	1711393	760665	2787	556164	15351	22305	67112	6488	463148	421171	59060	2943842	1946790	154795	16249	46816	1046263	128469	102761	44175	4201208	84673	125861	1001408	104339	327400	862301	159223	289334	541434	24593
6.17_245.19	245.186	6.166	Ile-Ile	Organic acids and derivatives	Carboxylic acids and derivatives	Amino acids, peptides, and analogues	Peptides	di-peptides	3	HILIC ESI+	[M+H]+	C12H24N2O3	BCVIOZZGJNOEQS-XKNYDFJKSA-N	CC[C@H](C)[C@@H](C(=O)N[C@@H]([C@@H](C)CC)C(=O)O)N	7010567	69.06996:261567 86.09644:10661858 88.30082:12176 132.10184:409348 146.10655:11095 199.18068:241672 203.04262:19990 229.17598:11145 245.18593:1019280	11151733	7778937	16491015	26426159	283574	3556407	680253	1089830	2043986	1095043	2657894	2586225	2642192	19966731	24061908	10041962	895338	1672882	10752851	3097140	1805045	1609129	24480971	7249308	7468502	12481928	3445540	8491283	8718581	3812817	22307945	8712651	1297089
6.16_243.17	243.171	6.158	Ile-Leu	Organic acids and derivatives	Carboxylic acids and derivatives	Amino acids, peptides, and analogues	Peptides	di-peptides	3	HILIC ESI-	[M-H]-	C12H24N2O3	JWBXCSQZLLIOCI-GUBZILKMSA-N	CC[C@H](C)[C@@H](C(=O)N[C@@H](CC(C)C)C(=O)O)N	7019082	50.53749:2388 58.80545:2044 64.4915:1935 92.13519:2123 98.74258:1995 129.10184:4099 130.08618:102779 199.181:121401 199.87381:2503 199.89159:3974 243.17139:458740	2661436	2389066	2889207	6700418	39488	1444727	183378	266497	241584	193340	783456	713912	417473	4189803	4145338	1216476	288565	467820	1837125	874162	711505	431734	6570974	1558038	1165287	3023328	1186574	179344	1345285	644043	5055380	1349829	170893
6.72_263.14	263.142	6.722	Ile-Met	Organic acids and derivatives	Carboxylic acids and derivatives	Amino acids, peptides, and analogues	Peptides	di-peptides	3	HILIC ESI+	[M+H]+	C11H22N2O3S	TUYOFUHICRWDGA-CIUDSAMLSA-N	CC[C@H](C)[C@@H](C(=O)N[C@@H](CCSC)C(=O)O)N	7020105	66.17252:1844 69.06992:2045 81.07024:2255 86.09645:218462 104.05276:9064 115.32704:1927 133.03134:4453 150.05835:45130 169.1338:4308 171.81924:2411 217.13698:3422 263.14182:27988	115689	239671	135224	140121	30723	86001	nd	112541	48813	9302	164141	92835	39636	180040	89903	33101	99824	134656	147189	80259	44030	72472	214515	176915	108202	243376	73830	169715	194679	146534	208522	51257	7723
6.28_277.16	277.156	6.278	Ile-Phe	Organic acids and derivatives	Carboxylic acids and derivatives	Amino acids, peptides, and analogues	Peptides	di-peptides	3	HILIC ESI-	[M-H]-	C15H22N2O3	WMDZARSFSMZOQO-WCFLWFBJSA-N	CC[C@H](C)[C@H](C(=O)N[C@@H](CC1=CC=CC=C1)C(=O)O)N		62.34509:2173 91.05389:9809 108.73728:1976 129.10219:92461 147.04404:24962 164.07072:27139 233.16556:11321 277.15567:132761	313427	296397	619377	676922	8432	237274	19350	34315	31307	24422	106614	98896	70484	623412	809785	72697	22367	45523	187085	96421	142088	53681	1174587	224491	157239	446312	300891	10575	261117	84651	573634	159548	31725
7.28_229.15	229.154	7.283	Ile-Pro	Organic acids and derivatives	Carboxylic acids and derivatives	Amino acids, peptides, and analogues	Peptides	di-peptides	3	HILIC ESI+	[M+H]+	C11H20N2O3	BBIXOODYWPFNDT-CIUDSAMLSA-N	CC[C@H](C)[C@@H](C(=O)N1CCC[C@H]1C(=O)O)N	11862120	51.92174:12132 52.03998:12154 58.06556:48576 59.72041:11823 60.08106:115172 69.06998:27128 70.0653:1301853 86.09656:3224306 114.05512:49825 116.07077:5210836 124.07579:65817 138.8334:14443 142.08629:483829 147.47446:12834 170.08099:54121 201.24751:15224 209.74744:12137 229.15494:6506868	4900378	6212901	8602387	6718838	50774	40088172	342206	23370446	21547118	61288	2654742	3152290	1553662	17227906	11140629	16896715	10039778	32148412	7755024	2673549	1331265	1652288	11049671	1466020	1793044	4737861	568231	5952816	1858979	1574667	456204	5879663	3403979
6.29_316.17	316.167	6.292	Ile-Trp	Organic acids and derivatives	Carboxylic acids and derivatives	Amino acids, peptides, and analogues	Peptides	di-peptides	3	HILIC ESI-	[M-H]-	C17H23N3O3	BVRPESWOSNFUCJ-NZVBXONLSA-N	CC[C@H](C)[C@H](C(=O)N[C@@H](CC1=CNC2=CC=CC=C21)C(=O)O)N		53.33335:2517 74.02341:25001 85.4653:2170 104.76746:2227 116.04935:15124 129.10222:36809 141.1026:3321 142.0645:2998 143.11789:33415 169.0979:12550 187.10812:104898 203.08224:22632 272.17633:17731 316.1666:186683	42897	59800	149306	135369	906	48521	8269	5863	9664	7697	41063	20518	11714	115629	186388	12058	4017	2614	30575	15058	24086	7692	285467	27888	50025	31136	58195	nd	64478	12790	92989	34733	2413
7.14_293.15	293.151	7.136	Ile-Tyr	Organic acids and derivatives	Carboxylic acids and derivatives	Amino acids, peptides, and analogues	Peptides	di-peptides	3	HILIC ESI-	[M-H]-	C15H22N2O4	MUFXDFWAJSPHIQ-TVYUQYBPSA-N	CC[C@H](C)[C@H](C(=O)N[C@@H](CC1=CC=C(C=C1)O)C(=O)O)N		58.80602:2068 59.01244:2140 59.53484:2311 62.59424:1990 65.88184:2152 68.51771:2209 71.46243:2150 91.03705:2124 104.19609:2121 107.04893:3279 119.04903:23887 129.1022:131988 143.11845:2213 163.03905:14596 180.06599:36932 187.10802:15340 192.62534:2168 221.15326:15024 236.10437:13415 249.15987:34390 293.15076:221944	97580	97098	215223	165647	514	83192	2808	17870	32164	11239	80451	29988	21976	249613	258612	56159	8759	33482	68867	13812	11902	6695	277722	59855	25859	133396	33673	10265	78319	39091	43913	71094	15214
6.73_229.16	229.155	6.734	Ile-Val	Organic acids and derivatives	Carboxylic acids and derivatives	Amino acids, peptides, and analogues	Peptides	di-peptides	3	HILIC ESI-	[M-H]-	C11H22N2O3	BCXBIONYYJCSDF-CIUDSAMLSA-N	CC[C@H](C)[C@@H](C(=O)N[C@@H](C(C)C)C(=O)O)N	449407	63.83315:2208 65.05228:2125 72.78358:1790 82.06491:3367 83.0489:2167 116.07057:65543 168.13895:2644 182.95354:2250 185.16531:75958 196.83513:2195 203.53375:2227 229.15565:241363	1528460	1522692	1500421	2827308	33506	565266	165171	250084	190263	108983	560417	380758	368283	2198298	1663500	557911	286463	435647	1096269	435727	349902	271863	4017082	1425001	616644	2079292	448987	197243	988523	227394	3537466	2712522	225490
1.09_263.08	263.081	1.089	Indigotin	Organoheterocyclic compounds	Indoles and derivatives	Hydroxyindoles	Hydroxyindoles	indoles	3	HILIC ESI+	[M+H]+	C16H10N2O2	QQILFGKZUJYXGS-UHFFFAOYSA-N	C1=CC=C2C(=C1)C(=C(N2)C3=NC4=CC=CC=C4C3=O)O		68.54292:8218 81.78831:7559 83.88465:7404 100.52038:6970 112.65201:7679 119.04907:9074 120.93932:7696 132.04459:52784 174.12813:11574 192.1384:110450 197.6492:38861 197.66986:14699 207.09113:12606 208.07529:16128 219.09172:504370 220.13315:108900 234.07921:14292 235.08662:503676 245.07133:32433 261.89752:9877 262.07367:100985 263.08142:12936221	320825	nd	nd	422940	nd	486165	nd	13205	184404	4306785	nd	nd	nd	391781	15680	nd	nd	nd	nd	475264	nd	nd	nd	302462	494010	520175	280981	308130	nd	nd	nd	91692	180841
6.22_319.23	319.226	6.221	Isosteviol	Lipids and lipid-like molecules	Prenol lipids	Diterpenoids	Diterpenoids	sugars	3	HILIC ESI+	[M+H]+	C20H30O3	KFVUFODCZDRVSS-XGBBNYNSSA-N	C[C@]12CC[C@H]3[C@@]4(CCC[C@@]([C@H]4CC[C@@]3(C1)CC2=O)(C)C(=O)O)C	99514	59.04943:23423 61.02853:11959 67.05421:2882 69.06992:2131 73.03619:2256 81.06965:15475 83.08556:2198 93.06958:10029 95.08556:30898 97.06493:2548 105.07008:4938 107.08565:21637 109.10122:47066 119.08536:14025 121.0645:4609 121.10119:43418 123.11693:16052 124.34702:2302 125.09533:9149 131.0853:9349 133.10172:17503 135.11641:21796 139.11145:19548 145.10075:15092 147.08035:4242 147.11697:23721 149.13…	nd	nd	nd	nd	nd	nd	nd	nd	nd	nd	nd	nd	nd	124814	nd	nd	nd	nd	nd	nd	nd	nd	nd	nd	nd	nd	nd	nd	nd	nd	nd	nd	nd
4.83_203.14	203.139	4.83	L-Alanyl-L-norleucine	Organic acids and derivatives	Carboxylic acids and derivatives	Amino acids, peptides, and analogues	Peptides	di-peptides	3	HILIC ESI+	[M+H]+	C9H18N2O3	RSIYBPVKRVHPQK-UHFFFAOYSA-N	CCCCC(C(=O)O)NC(=O)C(C)N	140473	56.98696:1974 66.71108:1853 69.06985:14168 69.25428:2288 86.09648:441547 90.05482:2128 96.41606:1976 97.02831:4283 121.3647:2024 122.92591:1888 139.91635:1964 185.80737:2021 202.80775:2195 203.13896:8289	2535	26111	nd	nd	nd	15838	nd	11510	2998	2964	nd	5627	nd	nd	3022	nd	nd	8816	nd	3315	19822	10971	51867	nd	20197	7252	11516	5368	23345	4819	169198	nd	nd
8.01_260.16	260.161	8.01	Leu-Gln	Organic acids and derivatives	Carboxylic acids and derivatives	Amino acids, peptides, and analogues	Peptides	di-peptides	3	HILIC ESI+	[M+H]+	C11H21N3O4	JYOAXOMPIXKMKK-YUMQZZPRSA-N	CC(C)C[C@@H](C(=O)N[C@@H](CCC(=O)N)C(=O)O)N	1574949	51.48657:1813 78.76443:2011 84.04454:14803 86.09648:186047 97.67973:2245 100.25907:1919 101.07095:4377 130.0499:118430 131.11754:13605 147.07631:292184 201.73386:2257 243.13499:22694 260.16077:79593	229866	383586	1792567	1519702	2670	121815	7435	22448	16030	27534	488042	149466	50674	4039560	653275	25440	27544	24565	623225	76466	72110	41146	2544819	77788	82735	189180	137077	141223	311796	124923	520348	71608	nd
6.79_302.21	302.207	6.785	Leu-Gly-Leu	Organic acids and derivatives	Carboxylic acids and derivatives	Amino acids, peptides, and analogues	Peptides	tri-peptides	3	HILIC ESI+	[M+H]+	C14H27N3O4	HYIFFZAQXPUEAU-UHFFFAOYSA-N	CC(C)CC(C(=O)NCC(=O)NC(CC(C)C)C(=O)O)N	259324	53.47851:2330 75.05531:2337 84.68502:1985 86.09635:516701 94.9058:2159 96.44328:2204 121.63498:2308 132.092:3154 132.10168:84036 137.19713:2585 141.81042:2229 143.11775:151474 171.11259:107841 189.12315:110725 189.14166:3646 204.14423:3638 257.1868:3882 302.13916:2417 302.2063:19885 302.30594:3488	3959	74781	65691	143520	nd	nd	nd	3889	11453	3300	nd	24187	3787	79845	82770	42882	3853	4012	47441	25250	27174	9014	221547	30972	112749	53029	68544	21343	56322	50998	449395	13834	4282
8.73_267.15	267.146	8.732	Leu-His	Organic acids and derivatives	Carboxylic acids and derivatives	Amino acids, peptides, and analogues	Peptides	di-peptides	3	HILIC ESI-	[M-H]-	C12H20N4O3	XWOBNBRUDDUEEY-UWVGGRQHSA-N	CC(C)C[C@@H](C(=O)N[C@@H](CC1=CN=CN1)C(=O)O)N	6992827	58.71275:2132 60.04307:2033 67.02878:17313 67.35646:2140 81.04444:18798 81.13592:2068 89.93021:2270 93.04448:20889 110.07111:133387 129.10229:44148 130.08618:38346 137.03474:9797 145.6364:2280 154.0612:79297 157.09685:2948 169.0974:32978 178.13422:3321 202.62369:3109 205.14534:45414 223.15608:88085 249.13506:10036 267.1463:393496	62874	88481	98777	158026	262	10279	1271	4552	2808	1937	13949	18566	14695	152815	142798	4984	nd	5964	70684	27723	27101	6531	337065	19015	30291	68340	50174	24563	63369	26848	20569	18468	614
8.45_373.28	373.281	8.45	Leu-Ile-Lys	Organic acids and derivatives	Carboxylic acids and derivatives	Amino acids, peptides, and analogues	Peptides	tri-peptides	3	HILIC ESI+	[M+H]+	C18H36N4O4	HNDWYLYAYNBWMP-UHFFFAOYSA-N	CCC(C)C(C(=O)NC(CCCCN)C(=O)O)NC(=O)C(CC(C)C)N	18222143	69.0699:2318 70.06531:3123 77.33344:2067 84.08083:47111 86.09647:276301 129.10225:74370 130.08627:81748 147.11273:223034 159.59062:2366 191.55399:2213 198.61214:11492 199.18056:155907 227.17557:39301 227.19801:2416 242.18642:5496 260.19705:64834 302.86996:2289 363.97235:2909 373.16418:4292 373.28207:216048	13525	74777	11774	23065	nd	nd	nd	52670	25499	2686	nd	79650	nd	39694	16998	2991	4191	2162	81858	181480	124188	89597	156279	54864	72533	76057	69036	3456	19402	108826	153506	33569	11689
8.37_401.29	401.287	8.371	Leu-Leu-Arg	Organic acids and derivatives	Carboxylic acids and derivatives	Amino acids, peptides, and analogues	Peptides	tri-peptides	3	HILIC ESI+	[M+H]+	C18H36N6O4	DSFYPIUSAMSERP-UHFFFAOYSA-N	CC(C)CC(C(=O)NC(CC(C)C)C(=O)NC(CCCN=C(N)N)C(=O)O)N	22184292	50.64764:2121 60.05588:32890 62.94972:2199 69.06999:3488 70.06518:36818 72.08108:4185 78.55412:2404 86.09648:279424 112.08698:17803 113.07063:4999 114.10223:4293 115.08652:21498 116.07057:36140 130.09726:16068 133.09698:10013 144.0896:2537 156.11313:40212 157.10822:9411 158.09242:47778 175.11896:362185 199.18054:133948 205.26443:2972 225.47699:2905 227.17532:45538 229.15746:2745 247.41208:2549 24…	1077269	nd	61682	1423288	nd	nd	nd	87848	83362	2606	nd	39866	6152	515798	69031	20012	3831	7106	52719	30473	8116	98221	677049	311680	138011	285496	63578	68129	2997	14241	726886	119169	116350
8.28_373.28	373.281	8.284	Leu-Leu-Lys	Organic acids and derivatives	Carboxylic acids and derivatives	Amino acids, peptides, and analogues	Peptides	tri-peptides	3	HILIC ESI+	[M+H]+	C18H36N4O4	LXKNSJLSGPNHSK-UHFFFAOYSA-N	CC(C)CC(C(=O)NC(CC(C)C)C(=O)NC(CCCCN)C(=O)O)N	18222159	63.66149:2357 70.06517:3192 73.67551:2061 80.53107:2240 82.99016:2555 84.08087:33730 86.09647:168431 101.10742:2499 129.10213:56014 130.08636:57729 143.38988:2268 147.11279:133472 158.47214:2206 198.4313:2474 199.18037:82344 202.6832:4033 227.17584:18055 239.92152:2454 242.1857:5206 260.19693:38267 373.15799:4750 373.28104:127187	48187	4713	nd	234969	nd	nd	nd	72641	71222	6755	nd	28280	7664	108479	8738	nd	5965	2677	39893	34871	18955	61519	139580	201804	55635	145367	71120	8875	18057	41480	1447787	56351	34731
9.09_258.18	258.182	9.089	Leu-Lys	Organic acids and derivatives	Carboxylic acids and derivatives	Amino acids, peptides, and analogues	Peptides	di-peptides	3	HILIC ESI-	[M-H]-	C12H25N3O3	OTXBNHIUIHNGAO-UWVGGRQHSA-N	CC(C)C[C@@H](C(=O)N[C@@H](CCCCN)C(=O)O)N	9816627	67.71097:2192 73.93426:2039 78.50996:2057 81.74815:2012 91.08363:2418 93.41135:2223 93.53736:2063 111.40585:2137 114.05452:2785 123.62917:2268 129.1021:20891 130.08633:2315 131.62837:2397 143.92188:2229 145.09721:208266 197.16585:4901 214.19206:225192 258.18234:787320	14745	72484	156139	182565	1008	6108	6002	10092	6556	9096	856	19957	7885	175741	202019	25683	4182	5999	93558	23738	16694	10428	236434	41763	17953	85324	57658	14815	24695	19339	20735	66910	6004
6.28_279.17	279.17	6.281	Leu-Phe	Organic acids and derivatives	Carboxylic acids and derivatives	Amino acids, peptides, and analogues	Peptides	di-peptides	3	HILIC ESI+	[M+H]+	C15H22N2O3	KFKWRHQBZQICHA-STQMWFEESA-N	CC(C)C[C@@H](C(=O)N[C@@H](CC1=CC=CC=C1)C(=O)O)N	6992309	67.05414:4058 69.06974:4727 81.06965:3850 85.02819:2042 86.09648:1007068 95.08551:2978 120.08084:74191 127.77066:2277 149.02321:4104 166.08633:111207 194.8586:2349 199.60359:4569 199.62184:3724 233.1646:9367 279.13489:8605 279.16983:64378 279.22916:2877	803941	810395	2371879	2230122	50284	432109	71681	114299	235575	145006	276322	326067	388514	2288359	2987789	508056	44514	168831	1002372	316858	378484	182245	4206581	950565	900331	1760413	646162	847248	1217218	370501	2788039	1002842	167118
7.72_231.13	231.135	7.716	Leu-Thr	Organic acids and derivatives	Carboxylic acids and derivatives	Amino acids, peptides, and analogues	Peptides	di-peptides	3	HILIC ESI-	[M-H]-	C10H20N2O4	LRKCBIUDWAXNEG-CSMHCCOUSA-N	C[C@H]([C@@H](C(=O)O)NC(=O)[C@H](CC(C)C)N)O	10353878	50.10356:2253 58.02841:28412 61.44991:2703 72.0075:9525 73.03912:3710 74.02335:253700 82.06499:5218 85.03923:4722 87.06342:2564 126.09086:23462 128.07042:4240 130.08612:64211 135.60326:2699 139.08623:3804 141.10207:77694 143.11778:392160 169.09721:167356 169.13319:36575 187.10793:1715883 188.11049:3327 202.06181:4177 231.13463:404700	119286	287185	223193	264729	1842	101374	21990	25635	36814	10842	103655	64959	37806	277122	333686	84988	18705	32768	202322	87820	31250	29707	616210	141193	67054	213707	61966	89511	104238	49187	273853	102175	31191
7.04_293.15	293.151	7.045	Leu-Tyr	Organic acids and derivatives	Carboxylic acids and derivatives	Amino acids, peptides, and analogues	Peptides	di-peptides	3	HILIC ESI-	[M-H]-	C15H22N2O4	LHSGPCFBGJHPCY-STQMWFEESA-N	CC(C)C[C@@H](C(=O)N[C@@H](CC1=CC=C(C=C1)O)C(=O)O)N	6994643	56.27515:2004 101.24456:2003 107.04853:3902 110.07586:2251 112.07568:2975 119.04881:28355 129.10216:143263 129.11304:5085 163.03888:13271 180.06563:47225 187.10767:13524 193.15892:10628 220.14569:8268 221.15437:28271 236.10457:29376 249.16069:37218 293.15018:216452	85275	35106	34370	83912	335	23286	407	18170	27837	5092	15572	12831	14272	118229	31183	9877	1462	21347	18285	14454	11993	2966	118960	46768	17518	52076	37056	2797	67982	27023	47369	14981	5883
5.40_165.08	165.076	5.401	L-Fucitol	Organic oxygen compounds	Organooxygen compounds	Carbohydrates and carbohydrate conjugates	Monosaccharides	sugar alcohols	3	HILIC ESI-	[M-H]-	C6H14O5	SKCKOFZKJLZSFA-KCDKBNATSA-N	C[C@@H]([C@H]([C@H]([C@@H](CO)O)O)O)O	445724	55.01765:59070 57.03335:86584 58.00483:18737 59.00532:53194 59.01253:2465496 69.0333:190481 71.01256:2077942 72.01584:12136 72.99188:23465 73.0282:928606 75.00732:19921 81.03331:74753 83.01268:99085 83.04892:139767 85.02826:851642 87.00764:95207 87.04394:195382 89.02319:1360179 91.039:59255 99.04411:66069 101.02326:1318778 103.03895:287967 105.05509:14767 111.04411:171523 115.03893:193487 119.034…	128727	689474	44891	82361	16240	1695249	40133	119897	109412	1571	297373	393405	86847	212641	219668	122903	30907	198786	138908	80475	27453	95823	81912	12453	89575	107088	3006	57555	21333	139754	224583	124120	97670
4.21_177.04	177.04	4.211	L-Gulono-1,4-lactone	Organoheterocyclic compounds	Lactones	Gamma butyrolactones	Gamma butyrolactones	sugar acids	3	HILIC ESI-	[M-H]-	C6H10O6	SXZYCXMUPBBULW-SKNVOMKLSA-N	C([C@@H]([C@@H]1[C@@H]([C@@H](C(=O)O1)O)O)O)O	439373	52.18184:1833 56.81038:2213 57.03318:22330 59.01252:86863 68.99677:13359 69.03275:2280 71.01257:66875 72.99146:3370 75.00751:20824 83.01247:9965 85.02823:35665 87.00732:7598 89.02311:41585 97.02835:2906 99.00757:80832 113.02312:4506 117.0182:13979 129.01828:127574 141.01799:10140 159.02893:8487 174.12253:2269 177.03969:51488	5527	76567	10893	45931	3599	85488	6702	14362	5167	2396	42861	39370	3074	16477	20236	9083	3307	10845	24909	10447	7705	3848	31558	2545	9501	26151	24695	5643	3484	5116	307874	32590	15315
0.60_545.32	545.325	0.604	LPG O-22:4	Lipids and lipid-like molecules	Glycerophospholipids	Glycerophosphoglycerols	Lysophosphatidylglycerols	unsaturated_phosphatidylglycerols	3	CSH ESI-	[M-H]-	C28H51O8P	QWHIBCRRFVWLPF-UHFFFAOYSA-N	O=P(O)(OCC(O)CO)OCC(O)COCCCCCCCCCC=CCC=CCC=CCC=CCC		78.9577:455002 110.52898:7023 138.0387:6124 153.03122:749921 190.76781:5248 197.63223:52592 207.27359:5607 233.28851:5627	nd	nd	nd	nd	nd	nd	27237	nd	22282	18237	nd	10334	12686	nd	nd	7760	21396	24658	nd	19864	5132539	18740	18125	10438	53163	nd	86921	12824	24340	13767	nd	20465	17465
9.89_261.16	261.156	9.892	Lys-Asn	Organic acids and derivatives	Carboxylic acids and derivatives	Amino acids, peptides, and analogues	Peptides	di-peptides	3	HILIC ESI+	[M+H]+	C10H20N4O4	JPNRPAJITHRXRH-BQBZGAKWSA-N	C(CCN)C[C@@H](C(=O)N[C@@H](CC(=O)N)C(=O)O)N	11219156	64.22401:2028 70.83894:2243 73.72705:2746 84.08089:707919 86.53383:2280 87.05544:13357 101.10749:88818 102.09132:3095 111.09226:3420 123.0908:2282 129.10225:394213 130.0863:36190 133.06064:17579 141.55267:2329 147.11279:71634 157.0975:12770 184.10858:12292 198.12451:5430 204.13437:3935 209.09253:51510 226.11874:63690 227.103:27085 233.05304:2682 243.14546:24243 244.12924:130668 261.15598:429529	206720	534964	688146	755631	3205	185616	5230	81007	14471	3124	575650	262362	4319	2659907	259243	3090	43189	62944	165985	203377	130283	87057	3774331	314242	65752	344256	35452	39156	82050	271279	323630	53927	3292
6.78_521.39	521.394	6.775	Lys-Dihydroxylated BA	Lipids and lipid-like molecules	Steroids and steroid derivatives	Bile acids, alcohols and derivatives	Glycinated bile acids and derivatives	conjugated bile acids	3	HILIC ESI+	[M+H]+	null	null	null		68.56477:2505 70.34396:2653 71.46032:3053 84.08079:16743 95.08528:2847 96.69824:2662 103.48797:2098 129.10199:27624 130.08624:11885 147.11278:23943 181.69469:2783 200.6857:2941 231.17058:2424 321.25845:3563 339.27078:4396 485.37198:45398 503.38403:50767 521.3056:3983 521.39447:113983	162387	55428	nd	nd	nd	148781	1313	64804	58923	nd	21853	nd	21826	nd	nd	nd	33726	120422	nd	70663	25177	3815	68078	nd	30944	6930	nd	353696	373699	152566	nd	8000	27784
8.77_258.18	258.182	8.773	Lys-Leu	Organic acids and derivatives	Carboxylic acids and derivatives	Amino acids, peptides, and analogues	Peptides	di-peptides	3	HILIC ESI-	[M-H]-	C12H25N3O3	ATIPDCIQTUXABX-UWVGGRQHSA-N	CC(C)C[C@@H](C(=O)O)NC(=O)[C@H](CCCCN)N	7016103	56.99501:2091 57.94136:2284 70.8795:2114 93.48509:2477 97.07571:8440 97.73474:2077 99.09144:3264 114.09096:2229 115.90507:2153 123.95406:1944 130.08614:109565 130.09723:3681 138.45021:2177 144.11298:12906 197.16589:8537 201.09207:3685 201.11063:4146 212.1756:3329 214.19197:136666 258.18225:467846	21269	12954	25729	120728	nd	nd	2360	6564	3982	1742	2157	3001	1740	112280	25967	3951	11382	11417	7714	5723	810	612	91241	41241	7678	46454	nd	41778	10572	4779	49771	968	nd
7.28_537.39	537.389	7.284	Lys-TriHydroxylated BA	Lipids and lipid-like molecules	Steroids and steroid derivatives	Bile acids, alcohols and derivatives	Glycinated bile acids and derivatives	conjugated bile acids	3	HILIC ESI+	[M+H]+	null	null	null		50.68186:2846 84.08065:18855 129.10199:14047 130.08627:13154 143.50847:2559 147.11269:11327 167.96074:2809 193.54385:3102 199.90874:9566 287.10272:3033 337.2543:10949 415.15182:2873 422.24722:2719 483.3602:24992 501.36832:22353 519.37708:13719 537.30688:31205 537.38916:111828	231500	192848	nd	nd	1883	42259	nd	204457	133117	nd	112542	48572	29251	nd	nd	8093	64558	231192	67088	255389	39566	51023	173775	43754	51095	39030	3538	335835	344007	941089	nd	49329	93592
6.41_261.13	261.128	6.409	Met-Ile	Organic acids and derivatives	Carboxylic acids and derivatives	Amino acids, peptides, and analogues	Peptides	di-peptides	3	HILIC ESI-	[M-H]-	C11H22N2O3S	OGGRSJFVXREKOR-CIUDSAMLSA-N	CCC(C)C(C(=O)O)NC(=O)C(CCSC)N	6451660	50.36456:2523 53.24385:2028 79.95622:2420 92.39587:2269 105.12885:1875 130.0862:142347 132.43521:2109 143.43819:2424 147.0583:2630 169.13377:13086 186.86209:2106 197.88518:2314 213.12386:9523 261.12784:526542 261.57812:2894	296798	227585	33689	302432	7784	101944	14068	67946	45539	14430	36792	52024	54901	168549	61797	80624	54712	95674	173391	155690	110759	50166	248625	214560	82229	333439	110954	21965	136263	104865	339586	76223	21680
6.1_540.33	540.334	6.096	Met-TriHydroxylated BA	Lipids and lipid-like molecules	Steroids and steroid derivatives	Bile acids, alcohols and derivatives	Glycinated bile acids and derivatives	conjugated bile acids	3	HILIC ESI+	[M+H]+	null	null	null		56.04977:41252 67.45536:2561 74.02365:61601 75.02635:43120 76.99072:2662 80.49738:2684 81.0701:3672 85.15793:2694 102.05491:10682 105.37219:2979 121.1012:3560 135.11679:3523 147.11688:5162 149.02686:27893 156.06528:14143 159.1171:3083 161.13271:4217 166.05319:337552 175.14821:4566 185.13243:3064 201.16481:3427 201.60556:4687 207.58839:2961 211.14655:4310 213.16357:4745 215.17958:2964 225.16443:34…	nd	7001	nd	nd	nd	nd	3810	5772	56764	43675	13401	13600	12670	nd	nd	nd	5411	nd	nd	7900	27241	5658	90987	nd	40298	18519	58751	18016	112829	126867	nd	24872	13614
7.04_247.11	247.112	7.045	Met-Val	Organic acids and derivatives	Carboxylic acids and derivatives	Amino acids, peptides, and analogues	Peptides	di-peptides	3	HILIC ESI-	[M-H]-	C10H20N2O3S	BJFJQOMZCSHBMY-YUMQZZPRSA-N	CC(C)C(C(=O)[O-])NC(=O)C(CCSC)[NH3+]	7010519	53.97707:2160 55.94526:1958 86.77039:2027 88.53069:2044 100.07522:3603 116.05019:2356 116.07053:119759 127.08702:3001 130.48093:2083 155.11829:11052 199.10751:3432 247.11208:411294	195665	56060	64510	302438	11688	45961	6480	76005	66461	15186	39769	16161	37211	303287	156070	114473	52195	115111	131754	37785	37284	22180	241485	231375	18908	109271	43573	33668	170033	51127	58432	61558	38325
6.10_179.06	179.055	6.098	Monnosaccharide	Organic oxygen compounds	Organooxygen compounds	Carbohydrates and carbohydrate conjugates	Monosaccharides	sugars	3	HILIC ESI-	[M-H]-	C6H12O6	WQZGKKKJIJFFOK-GASJEMHNSA-N	C(C1C(C(C(C(O1)O)O)O)O)O	5793	55.42195:2084 57.0335:2993 59.0125:156379 71.01253:125982 72.84339:2002 72.9917:3960 73.02821:2160 73.40027:1837 83.01228:3908 85.02802:12341 87.00723:4302 89.02315:69057 95.01273:3974 101.02328:35671 113.02306:11227 124.69948:2303 179.05444:2783	26941	66959	15933	32653	4014	200758	9486	19786	26156	1999	37660	52753	8524	31193	31256	16746	17451	26985	25818	24237	25013	23655	24499	5361	26038	74665	9202	98646	32611	16656	70069	41643	15783
6.08_353.27	353.269	6.075	Monolinolenin (9c,12c,15c)	Lipids and lipid-like molecules	Fatty Acyls	Lineolic acids and derivatives	Lineolic acids and derivatives	unsaturated_diglycerides	3	HILIC ESI+	[M+H]+	C21H36O4	GGJRAQULURVTAJ-PDBXOOCHSA-N	CC/C=C\C/C=C\C/C=C\CCCCCCCC(=O)OCC(CO)O	5367328	55.05462:4185 57.03389:3830 67.05446:45028 69.06995:4905 71.04952:2874 77.6828:2551 79.05434:16336 81.07001:75430 83.08563:9232 91.05459:10156 93.07007:38251 95.08569:60288 97.10121:3647 105.06979:10433 107.08575:34156 107.7683:2243 109.09383:2944 109.10144:46158 117.0701:3986 119.08548:13000 121.09238:2690 121.10141:46457 123.11675:30721 131.08527:18515 133.10146:17667 135.11716:46687 137.13246:…	345792	nd	nd	212636	2780	76570	nd	nd	nd	nd	53520	nd	nd	387788	32423	nd	nd	nd	84238	14183	nd	nd	294598	nd	nd	9485	nd	35585	3639	nd	nd	nd	nd
8.41_179.06	179.055	8.414	monosaccharide	Organic oxygen compounds	Organooxygen compounds	Alcohols and polyols	Secondary alcohols	sugar alcohols	3	HILIC ESI-	[M-H]-	C6H12O6	CDAISMWEOUEBRE-UHFFFAOYSA-N	C1(C(C(C(C(C1O)O)O)O)O)O	892	56.60387:2397 58.0047:2623 59.01253:165680 69.03326:4876 71.00809:4309 71.01255:128131 72.99198:9160 73.02824:21274 75.00742:32002 83.01244:10646 85.02824:49748 87.00753:328459 87.04353:3134 89.02319:65726 90.98461:4040 95.01255:4202 97.02827:17029 99.00761:58771 101.02325:45438 105.01844:3223 113.02357:26828 115.03905:2882 117.01825:118689 119.03392:4314 119.05343:3146 125.02337:86465 129.01814:…	770628	678162	100864	162743	6957	4500837	30890	152056	464758	5650	312124	387929	52482	311552	52247	127649	162945	325343	164990	124764	113292	146984	301625	29381	129077	390050	52660	78384	89963	79425	475055	195386	76764
8.90_384.15	384.149	8.905	N-acetyl lactosamine like	Organic oxygen compounds	Organooxygen compounds	Carbohydrates and carbohydrate conjugates	Aminosaccharides	amino alcohols	3	HILIC ESI+	[M+H]+	C14H25NO11	KFEUJDWYNGMDBV-RPHKZZMBSA-N	CC(=O)NC1C(C(C(OC1O)CO)OC2C(C(C(C(O2)CO)O)O)O)O	9800166	57.04486:1995 60.0447:10803 61.02879:3714 68.62845:2198 69.41709:2157 81.03371:2503 84.0444:33988 85.02847:11228 85.25545:2523 91.03906:3002 96.04438:2984 97.02868:4856 98.05995:4108 99.0442:5129 108.04482:2669 109.03041:2471 126.04441:5189 126.05496:163154 127.03922:5450 137.59288:2202 138.05507:33415 141.05463:8791 144.0656:37862 155.07005:8766 159.06415:7053 168.06599:14760 173.08139:2756 186.…	19782	1347854	nd	nd	nd	13317	nd	nd	4809	nd	nd	675145	68754	2479	24323	nd	nd	nd	nd	nd	nd	2011	255316	nd	nd	425321	nd	6178	60279	nd	nd	340291	nd
4.50_186.08	186.076	4.498	N-Acetyl-D-galactosamine	Organic oxygen compounds	Organooxygen compounds	Carbohydrates and carbohydrate conjugates	Aminosaccharides	hexosamines	3	HILIC ESI+	[M+H-2H2O]+	C8H15NO6	OVRNDRQMDRJTHS-CBQIKETKSA-N	CC(=O)N[C@@H]1[C@H]([C@H]([C@H](O[C@@H]1O)CO)O)O	84265	50.03976:2169 55.01823:3213 56.04988:2988 59.23781:2089 60.04113:4230 60.04457:119852 60.04794:4687 68.04955:11905 69.03368:12348 70.06526:12753 71.04919:2623 72.04442:12163 73.02846:4740 79.63261:2078 80.04935:26429 81.03342:25366 83.04939:3724 84.04435:45704 86.06037:2372 89.71694:2175 96.04432:153373 97.02182:3630 97.0284:67400 97.05249:2840 98.06:163508 99.04387:20236 100.03867:2715 104.10706…	5037	193556	3258	2971	4654	7284	7696	10752	16494	5861	2829	94770	15698	3283	30480	6512	nd	12965	29518	29418	7148	6138	447104	3383	27501	73579	9229	34018	131037	8062	4694	74133	37453
8.59_384.15	384.15	8.591	N-Acetyl-D-lactosamine	Lipids and lipid-like molecules	Fatty Acyls	Fatty acyl glycosides	Fatty acyl glycosides of mono- and disaccharides	hexosamines	3	HILIC ESI+	[M+H]+	C14H25NO11	HESSGHHCXGBPAJ-ZBELOFFLSA-N	CC(=O)N[C@@H](C=O)[C@H]([C@@H]([C@@H](CO)O)O[C@H]1[C@@H]([C@H]([C@H]([C@H](O1)CO)O)O)O)O	119547	60.0446:39478 61.02866:5416 61.80696:2737 62.30741:2751 68.04955:3976 69.03361:3739 70.06524:2779 71.0493:3053 77.19626:2283 81.03337:9204 84.04446:94152 84.08084:2946 85.02853:24318 91.03903:11249 95.04922:3275 96.04433:24220 97.02854:19498 98.05984:18548 99.04414:14114 108.04417:3324 109.02876:10836 111.04408:4238 113.05975:2873 126.05491:458370 127.03905:25272 127.0753:2727 138.05486:194160 14…	62719	1586459	37252	nd	nd	76624	1414	nd	nd	nd	7396	813366	50618	386014	74666	nd	nd	nd	8477	nd	2259	nd	289593	nd	nd	570013	nd	12636	42225	3433	2749	314932	2220
7.70_220.08	220.082	7.699	N-Acetylglucosamine	Organic oxygen compounds	Organooxygen compounds	Carbohydrates and carbohydrate conjugates	Aminosaccharides	hexosamines	3	HILIC ESI-	[M-H]-	C8H15NO6	OVRNDRQMDRJTHS-RTRLPJTCSA-N	CC(=O)N[C@@H]1[C@H]([C@@H]([C@H](OC1O)CO)O)O	439174	50.12164:1792 55.01757:4904 58.00471:4284 58.02849:10143 59.01247:401275 70.89574:2051 71.01255:60468 71.01691:4428 72.99162:4179 75.44798:1853 76.80178:2358 82.02845:2824 83.0124:12904 88.93648:1896 89.02314:55016 95.9361:2297 100.03908:148528 101.02316:96971 107.89378:1988 119.03368:45407 130.67265:2188 167.54553:2174 186.56361:2003 196.87802:13058	622220	3082273	100046	16711	2559	345518	223081	13569	303697	704	nd	3358441	416159	152421	682650	20021	3837	40030	1060079	628875	2045	11833	1446332	159830	720260	2273120	41518	383645	1400385	54298	116160	3256235	1363839
7.59_353.09	353.088	7.587	Neochlorogenic acid	Organic oxygen compounds	Organooxygen compounds	Alcohols and polyols	Cyclic alcohols and derivatives	phenolic natural products	3	HILIC ESI-	[M-H]-	C16H18O9	CWVRJTMFETXNAD-OELDUEEWSA-N	C1[C@H]([C@@H]([C@H](C[C@]1(C(=O)O)O)OC(=O)/C=C/C2=CC(=C(C=C2)O)O)O)O	9998242	54.42504:3805 59.01261:5304 71.01243:5034 85.02814:20546 87.00754:7234 90.82977:4663 93.03311:47645 100.46262:3990 108.24485:4279 111.00777:4328 111.04404:19131 127.03886:9126 135.04405:489215 137.02321:25958 155.0338:45131 161.02341:88021 173.0448:519767 179.03419:1362590 191.05544:3404916 191.78671:4469 198.28505:20626 318.20547:4303 353.0882:316172	59866	nd	41001	73388	4091	112477	790	454	1654	3712	44719	1490	4988	71212	nd	1927	5747	1142	2947	1964	3022	587	2675	582	776	228571	5771	1956	17898	974	19663	3118	2370
2.31_116.07	116.07	2.315	N-Methyl-L-threonine	Organic acids and derivatives	Carboxylic acids and derivatives	Amino acids, peptides, and analogues	Amino acids and derivatives	methylated amino acid	3	HILIC ESI+	[M+H-H2O]+	C5H11NO3	CCAIIPMIAFGKSI-DMTCNVIQSA-N	C[C@H]([C@@H](C(=O)[O-])[NH2+]C)O	7010354	60.27884:1931 70.06522:4421 98.06041:7307 116.07065:13874	317994	1990723	240564	187097	1023675	489369	1426000	211630	122958	329272	53074	1541782	1089239	181952	722597	952969	771300	247701	210945	539030	1021113	821147	1590715	1686729	2572349	1026904	1196577	122764	132216	215000	3465639	3141291	3422094
8.75_322.19	322.187	8.749	Phe-Arg	Organic acids and derivatives	Carboxylic acids and derivatives	Amino acids, peptides, and analogues	Peptides	di-peptides	3	HILIC ESI+	[M+H]+	C15H23N5O3	OZILORBBPKKGRI-RYUDHWBXSA-N	C1=CC=C(C=C1)C[C@@H](C(=O)N[C@@H](CCCN=C(N)N)C(=O)O)N	150903	58.77075:2260 60.05303:3023 60.05585:47452 70.0652:122981 72.08086:4060 112.0868:33411 114.07626:2268 115.08666:18844 116.07056:27858 120.08075:135279 120.09048:4512 130.09708:11437 140.08144:8410 157.10829:14416 158.09229:44853 160.09689:3917 175.1189:180086 190.09735:48728 201.96358:3003 227.7625:2324 242.12883:3414 245.12823:3290 246.1115:3078 259.15314:4209 262.15485:10589 263.13959:22479 287…	829299	330733	247283	1068033	5956	91563	6198	84560	126228	141061	159517	107957	70764	2008114	1057968	75397	67309	253390	151596	81551	57359	96309	2957990	349672	138145	600913	228934	222076	222047	171990	1519950	276515	82584
2.7_540.37	540.367	2.703	Phe-Dihydroxylated BA	Lipids and lipid-like molecules	Steroids and steroid derivatives	Bile acids, alcohols and derivatives	Glycinated bile acids and derivatives	conjugated bile acids	3	HILIC ESI+	[M+H]+	null	null	null		54.29011:2345 67.05434:3270 79.05442:3492 81.06993:4692 83.08514:3251 85.06461:3299 87.04396:3630 87.39809:2748 89.05949:6286 93.07018:3993 95.0853:14215 105.06976:4083 107.08556:13651 109.10088:5801 109.2103:2441 111.08057:2845 119.08549:4965 120.08063:160824 121.10146:10610 123.08037:3039 123.1167:3396 125.14925:2737 131.08514:4691 133.08562:3751 133.101:11425 135.11679:15440 145.10109:4945 147…	14922	5186	nd	nd	nd	4825	nd	10797	134102	25288	nd	nd	11068	nd	nd	nd	3687	87087	nd	14333	55265	39148	73304	2927	47822	nd	11384	32476	119579	71345	nd	nd	7656
5.64_279.17	279.17	5.643	Phe-Ile	Organic acids and derivatives	Carboxylic acids and derivatives	Amino acids, peptides, and analogues	Peptides	di-peptides	3	HILIC ESI+	[M+H]+	C15H22N2O3	JWBLQDDHSDGEGR-DRZSPHRISA-N	CCC(C)C(C(=O)[O-])NC(=O)C(CC1=CC=CC=C1)[NH3+]	7010565	69.56762:2147 72.94156:2413 73.13265:2242 75.09868:2299 86.09644:67022 92.42586:2113 93.06941:2280 95.08568:2862 103.05417:4052 111.67341:2321 120.0808:877662 132.10178:37431 149.02292:3381 174.75735:2434 233.16457:42117 239.90189:2286 258.68088:2073 279.0972:2664 279.17007:101398 279.20505:3778	1127037	1320514	1542984	3125769	39792	427557	42113	164213	165793	131338	484301	462724	398583	1539917	1590856	270635	172770	298733	956703	519234	457750	168447	2233960	430839	775749	796235	724131	879588	1292569	733505	222181	733261	142909
8.46_393.25	393.249	8.458	Phe-Val-Lys	Organic acids and derivatives	Carboxylic acids and derivatives	Amino acids, peptides, and analogues	Peptides	tri-peptides	3	HILIC ESI+	[M+H]+	C20H32N4O4	RGMLUHANLDVMPB-UHFFFAOYSA-N	CC(C)C(C(=O)NC(CCCCN)C(=O)O)NC(=O)C(CC1=CC=CC=C1)N	18223411	53.55702:2302 55.84438:2240 68.48909:2640 72.0808:49165 73.66199:2267 84.0808:47836 88.8052:2118 102.80088:2177 120.08079:142923 120.09068:4637 129.10223:38754 130.0862:60509 135.83182:2433 147.11266:135632 199.3008:4254 199.31862:3283 211.92542:2594 219.14931:109572 246.18092:24697 247.14391:17745 288.66821:2473 393.18729:9569 393.24966:136803	85600	nd	nd	nd	nd	nd	nd	nd	nd	nd	nd	nd	nd	3393	nd	nd	nd	nd	nd	nd	nd	11891	80921	20965	nd	43866	5675	nd	nd	2122	242483	25817	nd
7.23_115.09	115.087	7.231	Prolinamide	Organic acids and derivatives	Carboxylic acids and derivatives	Amino acids, peptides, and analogues	Amino acids and derivatives	di-peptides	3	HILIC ESI+	[M+H]+	C5H10N2O	VLJNHYLEOZPXFW-UHFFFAOYSA-N	C1CC(NC1)C(=O)N	550774	70.06525:25375 115.08644:2628	674016	369971	447213	601274	211139	612347	161862	546597	678591	2101158	299069	472173	354158	702709	1422880	643952	432395	324533	315790	446829	512811	570817	533193	942660	758681	699721	709800	1429414	554594	706108	185073	477750	420367
5.77_480.33	480.332	5.766	Ser-Dihydroxylated BA	Lipids and lipid-like molecules	Steroids and steroid derivatives	Bile acids, alcohols and derivatives	Glycinated bile acids and derivatives	conjugated bile acids	3	HILIC ESI+	[M+H]+	null	null	null		55.05462:2374 57.6139:2359 60.04474:12972 62.06026:12435 69.06998:4370 81.07:10249 83.08568:3726 84.6599:2673 85.36021:2304 88.03932:4713 90.18218:2778 93.06969:2346 95.08581:6085 104.10689:22329 106.04997:66145 107.08546:5063 109.10139:5416 121.10154:4524 126.02196:5320 133.10101:4044 133.6637:2528 135.1169:9821 145.1006:3237 147.11694:4701 149.13203:4844 155.01097:3338 157.10226:2780 159.11806:…	476369	41946	335219	361970	nd	245562	nd	128871	163878	nd	190311	60665	53356	492736	216885	41296	107660	249401	70052	80767	47445	43384	164335	47560	54682	75145	21133	366763	169785	359064	nd	nd	38648
9.16_347.23	347.229	9.164	Ser-Ile-Lys	Organic acids and derivatives	Carboxylic acids and derivatives	Amino acids, peptides, and analogues	Peptides	tri-peptides	3	HILIC ESI+	[M+H]+	C15H30N4O5	JIPVNVNKXJLFJF-UHFFFAOYSA-N	CCC(C)C(C(=O)NC(CCCCN)C(=O)O)NC(=O)C(CO)N	18223968	54.0751:2191 60.04465:10662 60.74192:2137 82.32622:2155 84.08079:76095 85.33313:2188 86.09644:53494 87.05501:13177 105.06477:2893 109.20161:2481 128.1066:11289 129.09152:4359 129.10207:89237 129.11292:3410 130.0862:110830 147.11264:204174 173.12833:268552 201.08659:2561 201.12187:21510 216.13371:2687 240.09561:2935 242.18565:3855 260.19589:16485 329.17056:2681 347.0947:20064 347.22885:298217	25379	33303	29897	64754	nd	76558	1507	17297	13707	2045	21768	40048	3153	167260	18012	3132	9796	14308	6666	5132	3473	63350	411757	10403	6788	32685	6221	9913	6078	30240	522341	16715	nd
7.82_217.12	217.119	7.82	Ser-Leu	Organic acids and derivatives	Carboxylic acids and derivatives	Amino acids, peptides, and analogues	Peptides	di-peptides	3	HILIC ESI-	[M-H]-	C9H18N2O4	NFDYGNFETJVMSE-BQBZGAKWSA-N	CC(C)C[C@@H](C(=O)O)NC(=O)[C@H](CO)N	7015694	58.05507:2717 59.01244:9834 63.10724:2278 71.01239:2291 73.03943:47090 74.02335:2542 89.02277:9057 101.02293:2668 112.07566:2528 114.09107:2361 125.12691:2277 130.08623:425363 140.38596:2259 141.10222:5330 143.11794:137776 155.11763:9888 169.09808:2792 179.0545:2563 187.10812:1121764 199.10866:21433 200.91255:2753 200.92981:2764 217.11902:584124	232437	333462	208333	277396	5132	101595	28936	40806	43105	20282	126137	68445	62795	263294	311416	127416	40958	63737	205166	119416	60987	51418	699682	195268	97094	218313	66194	196233	221998	65857	195728	128895	31486
6.69_496.33	496.326	6.692	Ser-TriHydroxylated BA	Lipids and lipid-like molecules	Steroids and steroid derivatives	Bile acids, alcohols and derivatives	Glycinated bile acids and derivatives	conjugated bile acids	3	HILIC ESI+	[M+H]+	[C27H46NO7]+	LLEBFOGPKXFKIL-UHFFFAOYSA-O	CC(CCC(=[NH+]C(CO)C(=O)O)O)C1CCC2C1(C(CC3C2C(CC4C3(CCC(C4)O)C)O)O)C	137628442	55.05436:3510 60.04464:57096 81.06976:17984 85.06497:20375 88.03948:28853 93.06985:11279 95.0853:18119 105.06982:6952 106.04991:332799 107.0854:23090 109.1014:4760 117.07004:3149 119.08562:15235 121.10126:16587 125.38525:2687 131.08551:5082 133.02507:3100 133.1011:12154 135.11664:11335 143.08542:4520 144.06499:4034 145.1013:15244 147.11674:16301 149.09622:5268 157.10104:16386 159.11662:24532 161.…	346343	119052	249755	229042	nd	149202	4635	128551	286077	nd	172199	28313	18567	355538	148727	62414	83563	183664	304818	249611	125739	156454	306156	nd	116465	161658	nd	470054	198444	644586	nd	86803	152983
8.89_193.03	193.035	8.89	sugar acid	Organic oxygen compounds	Organooxygen compounds	Carbohydrates and carbohydrate conjugates	Sugar acids and derivatives	phenolic natural products	3	HILIC ESI-	[M-H]-	C12H24O9	VBUYCZFBVCCYFD-JJYYJPOSSA-N	C([C@H]([C@H]([C@@H](C(=O)C(=O)O)O)O)O)O	3035456	50.03493:63265 50.08788:65138 55.01786:82440 57.03333:447825 59.01251:8879892 60.80036:67424 64.07692:68848 69.03343:87895 71.01254:4900588 72.9918:12065850 73.02818:3377841 75.00774:93759 83.01266:326203 85.02826:4469949 87.00761:135615 89.02316:2520318 89.02888:95344 93.35613:75528 95.01253:555739 99.00777:380482 101.02321:3802066 103.00243:1378966 113.02328:7057772 129.01764:69741 131.03387:10…	1526569	239195	54404	156618	9792	12565049	60869	32533	10702	10808	318404	118147	63255	406316	279445	29203	45172	91727	559111	546658	77514	37939	760115	20635	242637	161914	49754	1031145	294623	96948	170007	74406	221652
4.58_163.06	163.06	4.581	sugar alcohol 1	Organic oxygen compounds	Organooxygen compounds	Carbohydrates and carbohydrate conjugates	Sugar alcohols	sugar alcohols	3	HILIC ESI-	[M-H-H2O]-	C6H14O6	FBPFZTCFMRRESA-JGWLITMVSA-N	C(C(C(C(C(CO)O)O)O)O)O	5780	51.92123:2155 55.01772:19786 57.03322:35392 58.00488:2820 59.01255:156087 67.87272:2097 69.03325:8543 71.0081:4792 71.0126:136831 72.99198:2657 73.02828:48847 83.0125:18775 85.02828:120569 87.04401:2564 89.02323:26060 91.03893:11814 95.01242:3330 97.02842:13323 99.00771:3988 99.04383:2498 101.02328:496574 103.03858:4374 113.02325:59212 115.03876:3030 119.04974:2744 122.2964:1942 127.03865:5151 13…	362245	1220694	188976	92882	119906	1059036	55991	102386	126349	25224	1302697	681222	155250	153979	2263209	133828	51500	61426	166157	157247	86050	58601	694962	153207	145463	310925	226855	285922	68450	346807	335821	281963	166020
8.75_183.09	183.086	8.748	sugar alcohol 2	Organic oxygen compounds	Organooxygen compounds	Carbohydrates and carbohydrate conjugates	Sugar alcohols	sugar alcohols	3	HILIC ESI+	[M+H]+	C6H14O6	FBPFZTCFMRRESA-JGWLITMVSA-N	C(C(C(C(C(CO)O)O)O)O)O	5780	53.03907:2689 55.01834:15232 55.0546:15065 56.52761:2177 57.03377:29951 59.0495:2724 61.02877:30936 62.83301:2090 63.25586:2065 69.03361:240847 71.04936:15146 73.02843:13268 73.06533:2708 81.03333:16015 83.04916:92362 85.0284:60908 87.04406:29218 91.03898:14060 98.79849:2469 99.04408:39348 103.03893:22926 111.04411:75562 113.96396:4061 117.05447:8108 125.59799:2253 128.04753:1953 129.0546:75060 1…	109793	776751	402066	169334	nd	439920	13336	nd	nd	nd	3720454	418036	nd	643925	810341	nd	nd	2460	2226	nd	nd	1883	124916	nd	nd	4269	nd	45040	nd	2443	910398	35275	nd
8.76_343.12	343.125	8.764	sugar alcohol 3	Lipids and lipid-like molecules	Fatty Acyls	Fatty acyl glycosides	Fatty acyl glycosides of mono- and disaccharides	sugars	3	HILIC ESI-	[M-H]-	C12H24O11	VQHSOMBJVWLPSR-QMRWEYQWSA-N	C([C@@H]1[C@@H]([C@@H]([C@H]([C@@H](O1)O[C@H]([C@@H](CO)O)[C@@H]([C@@H](CO)O)O)O)O)O)O	7130189	53.82315:2418 58.00462:5026 59.01249:676779 71.01251:438089 73.02815:35229 75.96444:2427 83.01242:5603 85.02814:39494 87.0075:30548 89.02313:625559 95.01225:24226 97.02804:3406 101.02319:327682 102.65735:2388 103.03876:3300 107.03357:3011 113.02321:231658 115.03886:9669 119.03381:292465 125.02354:3183 127.67867:2723 131.03398:39235 132.79907:3002 143.03387:79312 149.0448:27083 161.0446:69500 163.…	198130	483907	366237	241976	473	1007633	21035	170788	530321	nd	2061611	367504	1893	570949	1314309	884	1549	832	8399	1179	1204	2836	112738	709	305799	12248	18526	229375	5614	313711	1583714	43407	1004
8.86_343.12	343.125	8.86	sugar alcohol 4	Lipids and lipid-like molecules	Fatty Acyls	Fatty acyl glycosides	Fatty acyl glycosides of mono- and disaccharides	sugars	3	HILIC ESI-	[M-H]-	C12H24O11	VQHSOMBJVWLPSR-JVCRWLNRSA-N	C([C@@H]1[C@@H]([C@@H]([C@H]([C@@H](O1)O[C@H]([C@@H](CO)O)[C@@H]([C@H](CO)O)O)O)O)O)O	157355	54.11545:1926 57.24834:2071 59.01245:129728 61.84903:2019 71.01247:79485 73.02795:3436 75.83336:2664 78.94913:2201 85.0281:5544 87.0078:2774 89.0231:112250 95.01254:3472 101.02308:59366 102.05466:11884 109.82227:2332 113.0231:43015 119.03365:48402 128.03381:20502 129.44478:2421 131.03394:4851 136.82603:2263 141.8087:2410 143.03391:10696 146.04468:111580 161.04422:12371 163.06004:4041 168.02689:14…	46112	741600	366237	30726	272	582269	38354	170788	530321	nd	563820	517733	23306	70885	1314309	134102	62747	107127	331007	315838	24128	226663	116111	39492	305799	265751	77683	70749	171776	313711	164305	374514	420411
9.05_367.12	367.121	9.051	sugar alcohol 5	Lipids and lipid-like molecules	Fatty Acyls	Fatty acyl glycosides	Fatty acyl glycosides of mono- and disaccharides	sugars	3	HILIC ESI+	[M+Na]+	C12H24O11	VQHSOMBJVWLPSR-WUJBLJFYSA-N	C([C@@H]1[C@H]([C@@H]([C@H]([C@H](O1)O[C@H]([C@@H](CO)O)[C@@H]([C@H](CO)O)O)O)O)O)O	493591	63.52646:2204 66.25703:2333 67.33006:2580 77.03601:2355 77.13939:2122 107.41027:2182 140.35435:2004 143.40833:2062 186.37936:2403 203.68468:2089 205.06894:49663 367.12097:258030	1108554	1648047	314056	390142	nd	7013424	92163	nd	nd	nd	4343091	1656953	nd	1024184	1436262	nd	nd	286845	64745	nd	nd	nd	112975	nd	nd	89377	nd	16818	nd	nd	2731707	20627	nd
9.07_183.09	183.086	9.068	sugar alcohol 6	Organic oxygen compounds	Organooxygen compounds	Carbohydrates and carbohydrate conjugates	Sugar alcohols	sugar alcohols	3	HILIC ESI+	[M+H]+	C6H14O6	FBPFZTCFMRRESA-JGWLITMVSA-N	C(C(C(C(C(CO)O)O)O)O)O	5780	53.03891:3248 55.01815:25164 55.05453:26385 55.07407:2700 57.03378:54343 58.79078:2155 61.02859:57259 61.49457:2396 65.03873:2991 65.23808:1933 67.05431:2583 69.03358:379160 71.04919:24395 72.04927:2428 73.0283:17094 74.26728:2503 75.04412:4540 81.03351:22154 83.04915:146155 85.02836:104915 87.0441:45688 91.03893:20415 92.71296:2397 97.35426:2340 99.04401:62496 101.05974:3489 102.94833:2455 103.0…	62443	529401	6586	31924	nd	656496	9841	nd	nd	nd	722275	372635	nd	136928	6856	nd	2472	14153	nd	nd	nd	nd	5292	nd	nd	3982	nd	nd	nd	nd	340465	11974	nd
[truncated: 1,235 more rows]
[truncated: 333 more columns]

## Sheet: Table S2
Feature Curation of non-targeted LC-MS/MS	HILIC-MS/MS ESI+		HILIC-MS/MS ESI-		CSH-MS/MS ESI+		CSH-MS/MS ESI-
[truncated: 8 more rows]

## Sheet: Table S3
Sample Information
[truncated: 367 more rows]

[truncated: 6 more sheets: Table S4, Table S5, Table S6, Table S7, Table S8, Table S9]
